# Supplementary material for: Identification and Cloning of a Putative Male Fertility Gene Encoding an Oxidosqualene Cyclase in Qingke
Source: MDPI journal article supplement (doi:10.3390/agronomy13051292), 2023-04-30
Supplement: s1 [file s1]

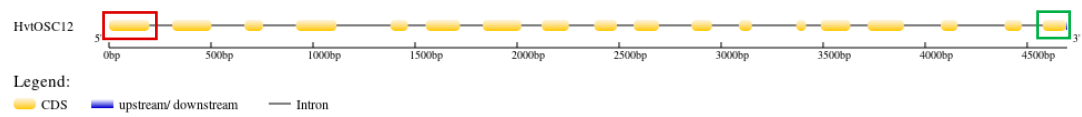

**Figure S5.** The structure of *HvtOSC12*. The red and green boxes represented the alternative splicing events of TSS (Alternative 5' first exon) and TTS (Alternative 3' last exon) by prediction, respectively.
