# Supplementary material for: Identification and Cloning of a Putative Male Fertility Gene Encoding an Oxidosqualene Cyclase in Qingke
Source: MDPI journal article supplement (doi:10.3390/agronomy13051292), 2023-04-30
Supplement: s1 [file s1]

Archive with 18 entries (18 files):
- Appendix A.1.xlsx
- Appendix A.2.pdf
- Appendix A.3.pdf
- Appendix A.4.xlsx
- Figure S1.pdf
- Figure S2.pdf
- Figure S3.pdf
- Figure S4.pdf
- Figure S5.pdf
- Figure S6.pdf
- Table S1.xlsx
- Table S2.xlsx
- Table S3.xlsx
- Table S4.xlsx
- Table S5.xlsx
- Table S6.xlsx
- Table S7.xlsx
- Table S8.xlsx
