# Supplementary material for: Identification and Cloning of a Putative Male Fertility Gene Encoding an Oxidosqualene Cyclase in Qingke
Source: MDPI journal article supplement (doi:10.3390/agronomy13051292), 2023-04-30
Supplement: s1 [file s1 › Appendix A.1.xlsx]

## Sheet: Sheet 1
#ID	gene_name	nr_symbol	ZQ2000-S3-1_FPKM	ZQ2000-S3-1_count	ZQ2000-S3-2_FPKM	ZQ2000-S3-2_count	ZQ2000-S3-3_FPKM	ZQ2000-S3-3_count	XML22-S3-1_FPKM	XML22-S3-1_count	XML22-S3-2_FPKM	XML22-S3-2_count	XML22-S3-3_FPKM	XML22-S3-3_count	ZQ2000-S2-1_FPKM	ZQ2000-S2-1_count	ZQ2000-S2-2_FPKM	ZQ2000-S2-2_count	ZQ2000-S2-3_FPKM	ZQ2000-S2-3_count	XML22-S2-1_FPKM	XML22-S2-1_count	XML22-S2-2_FPKM	XML22-S2-2_count	XML22-S2-3_FPKM	XML22-S2-3_count	ZQ2000-S1-1_FPKM	ZQ2000-S1-1_count	ZQ2000-S1-2_FPKM	ZQ2000-S1-2_count	ZQ2000-S1-3_FPKM	ZQ2000-S1-3_count	XML22-S1-1_FPKM	XML22-S1-1_count	XML22-S1-2_FPKM	XML22-S1-2_count	XML22-S1-3_FPKM	XML22-S1-3_count	ZQ2000-S3-1_ZQ2000-S3-2_ZQ2000-S3-3_vs_XML22-S3-1_XML22-S3-2_XML22-S3-3_DESeq2_FDR	ZQ2000-S3-1_ZQ2000-S3-2_ZQ2000-S3-3_vs_XML22-S3-1_XML22-S3-2_XML22-S3-3_DESeq2_log2FC	ZQ2000-S3-1_ZQ2000-S3-2_ZQ2000-S3-3_vs_XML22-S3-1_XML22-S3-2_XML22-S3-3_DESeq2_(FDR_0.05_FC_2)_regulated	ZQ2000-S2-1_ZQ2000-S2-2_ZQ2000-S2-3_vs_ZQ2000-S3-1_ZQ2000-S3-2_ZQ2000-S3-3_DESeq2_FDR	ZQ2000-S2-1_ZQ2000-S2-2_ZQ2000-S2-3_vs_ZQ2000-S3-1_ZQ2000-S3-2_ZQ2000-S3-3_DESeq2_log2FC	ZQ2000-S2-1_ZQ2000-S2-2_ZQ2000-S2-3_vs_ZQ2000-S3-1_ZQ2000-S3-2_ZQ2000-S3-3_DESeq2_(FDR_0.05_FC_2)_regulated	ZQ2000-S2-1_ZQ2000-S2-2_ZQ2000-S2-3_vs_XML22-S2-1_XML22-S2-2_XML22-S2-3_DESeq2_FDR	ZQ2000-S2-1_ZQ2000-S2-2_ZQ2000-S2-3_vs_XML22-S2-1_XML22-S2-2_XML22-S2-3_DESeq2_log2FC	ZQ2000-S2-1_ZQ2000-S2-2_ZQ2000-S2-3_vs_XML22-S2-1_XML22-S2-2_XML22-S2-3_DESeq2_(FDR_0.05_FC_2)_regulated	XML22-S2-1_XML22-S2-2_XML22-S2-3_vs_XML22-S3-1_XML22-S3-2_XML22-S3-3_DESeq2_FDR	XML22-S2-1_XML22-S2-2_XML22-S2-3_vs_XML22-S3-1_XML22-S3-2_XML22-S3-3_DESeq2_log2FC
HORVU.MOREX.r3.1HG0000030	HORVU.MOREX.r3.1HG0000030	--	15.836	373	16.69	384	14.6619	346	12.7969	281	12.6288	280	12.4719	296	11.1023	292	15.6585	344	10.756	280	12.7867	282	12.6119	285	11.0285	242	14.4891	350	16.4316	361	14.5499	313	20.0306	453	21.0948	465	20.5844	447	0.483822	-0.118705	normal	0.106376	0.291679	normal	0.887805	-0.035867	normal	0.219372	0.217217
HORVU.MOREX.r3.1HG0000040	HORVU.MOREX.r3.1HG0000040	--	43.7337	2972	43.3408	2875	40.9767	2788	45.6841	2891	44.4992	2839	42.9153	2936	46.1392	3501	44.3273	2806	43.5037	3259	49.0871	3120	46.5728	3031	43.7766	2762	31.3947	2187	32.1196	2031	31.8396	1976	36.8295	2403	34.6622	2202	35.7446	2236	0.000420968	0.248992	normal	0.10917	-0.100555	normal	0.468929	0.0573318	normal	0.23674	0.0957352
HORVU.MOREX.r3.1HG0000050	HORVU.MOREX.r3.1HG0000050	LOC109734572	28.2944	1676	28.004	1620	26.9662	1600	25.9464	1432	24.4196	1359	24.7324	1475	23.6116	1562	23.5044	1298	24.7207	1615	26.4341	1465	24.1578	1371	26.0265	1432	27.5836	1675	25.9939	1433	24.8599	1345	30.7736	1751	30.0934	1667	29.5267	1611	0.64082	0.04507	normal	0.0209186	0.176222	normal	0.328766	0.0912605	normal	0.146344	0.134052
HORVU.MOREX.r3.1HG0000060	HORVU.MOREX.r3.1HG0000060	--	13.0555	1280	13.5707	1298	12.8132	1257	10.2013	931	10.3483	953	11.5567	1140	10.4456	1144	10.6547	973	10.3116	1114	10.6236	974	10.3174	969	10.0246	913	12.9174	1298	11.788	1075	12.3476	1105	12.5726	1183	13.2628	1215	12.0579	1088	0.324549	-0.101656	normal	0.000367948	0.291211	normal	0.873131	-0.0199061	normal	0.0353254	0.213619
HORVU.MOREX.r3.1HG0000070	HORVU.MOREX.r3.1HG0000070	--	166.443	5474	162.904	5230	161.99	5334	179.487	5497	186.269	5752	162.746	5388	140.777	5171	150.091	4599	146.224	5301	139.863	4303	131.978	4157	132.565	4049	98.3097	3314	103.292	3162	94.8566	2849	95.503	3016	98.1083	3016	99.4031	3010	1.42226e-05	0.298207	normal	0.010423	0.133311	normal	0.0590041	-0.111457	normal	4.88107e-15	0.548476
HORVU.MOREX.r3.1HG0000080	HORVU.MOREX.r3.1HG0000080	--	13.3909	1066	12.4209	965	11.3138	902	11.0892	822	10.6962	800	12.4155	995	15.0256	1336	16.1272	1196	17.2983	1518	11.7818	877	13.0462	995	13.5928	1005	14.7424	1203	15.5562	1152	14.0265	1020	13.5552	1036	15.0642	1121	14.5077	1063	0.545557	0.0754341	normal	1.09638e-05	-0.417598	normal	0.000498082	-0.330605	normal	0.969647	-0.00506849
HORVU.MOREX.r3.1HG0000090	HORVU.MOREX.r3.1HG0000090	--	8.53403	592	8.02207	544	8.13423	565	6.41211	415	6.17956	403	6.6559	465	9.03347	700	9.55831	618	9.95591	762	10.3791	674	10.2825	684	10.13	653	5.82287	414	4.98756	322	5.59842	355	6.08958	406	6.47206	420	5.60103	358	0.228043	-0.162694	normal	0.0343292	-0.242889	normal	0.399486	0.107519	normal	1.57672e-05	-0.512617
HORVU.MOREX.r3.1HG0000110	HORVU.MOREX.r3.1HG0000110	--	33.0569	5074	32.4781	4866	34.5247	5305	29.0681	4155	29.1677	4204	33.6329	5197	48.0185	8231	48.1048	6880	49.4461	8366	49.2681	7075	46.3018	6807	46.3523	6606	36.4186	5730	34.4865	4926	37.5994	5271	37.7	5556	36.0155	5167	35.9174	5076	0.393012	0.0701469	normal	4.66851e-33	-0.575306	normal	0.547742	-0.0366742	normal	5.55405e-12	-0.464687
HORVU.MOREX.r3.1HG0000120	HORVU.MOREX.r3.1HG0000120	--	0	0	0	0	0	0	0	0	0	0	0	0	0.129541	3	0	0	0	0	0	0	0	0	0	0	0	0	0	0	0	0	0	0	0	0	0	0	--	--	--	--	--	--	--	--	--	--	--
HORVU.MOREX.r3.1HG0000130	HORVU.MOREX.r3.1HG0000130	--	48.5251	8168	49.046	8059	51.4618	8672	48.3325	7575	47.8062	7556	55.7	9438	47.3735	8905	46.2077	7247	45.7897	8497	50.0925	7888	48.3597	7796	54.2591	8481	48.3716	8346	51.1594	8014	45.8858	7054	55.6964	9001	54.0853	8510	57.4943	8911	0.00195832	0.219624	normal	0.232015	0.0612732	normal	0.0135541	0.130909	normal	0.0358602	0.153607
HORVU.MOREX.r3.1HG0000140	HORVU.MOREX.r3.1HG0000140	--	20.4957	1498	17.8406	1273	20.2472	1481	13.9181	947	15.7046	1078	13.1677	969	7.28089	595	8.46669	577	8.7416	705	9.40758	643	10.4887	734	9.47857	644	7.26061	544	7.59857	517	7.85522	525	7.72809	543	9.18651	628	8.02282	540	0.0164193	-0.258032	normal	2.29826e-33	1.21354	up	0.0412416	0.255648	normal	2.10818e-10	0.702516
HORVU.MOREX.r3.1HG0000160	HORVU.MOREX.r3.1HG0000160	--	0	0	0	0	0	0	0	0	0	0	0	0	0	0	0	0	0	0	0	0	0	0	0	0	0	0	0	0	0	0	0	0	0	0	0	0	--	--	--	--	--	--	--	--	--	--	--
HORVU.MOREX.r3.1HG0000170	HORVU.MOREX.r3.1HG0000170	--	0	0	0	0	0	0	0	0	0	0	0	0	0	0	0	0	0	0	0	0	0	0	0	0	0	0	0	0	0	0	0	0	0	0	0	0	--	--	--	--	--	--	--	--	--	--	--
HORVU.MOREX.r3.1HG0000180	HORVU.MOREX.r3.1HG0000180	--	0	0	0	0	0	0	0	0	0	0	0	0	0	0	0	0	0	0	0	0	0	0	0	0	0	0	0	0	0	0	0	0	0	0	0	0	--	--	--	--	--	--	--	--	--	--	--
HORVU.MOREX.r3.1HG0000200	HORVU.MOREX.r3.1HG0000200	--	0	0	0	0	0	0	0	0	0	0	0	0	0	0	0	0	0	0	0	0	0	0	0	0	0	0	0	0	0	0	0	0	0	0	0	0	--	--	--	--	--	--	--	--	--	--	--
HORVU.MOREX.r3.1HG0000210	HORVU.MOREX.r3.1HG0000210	--	0.03081	5	0	0	0.030777	5	0	0	0	0	0	0	0	0	0	0	0	0	0	0	0	0	0	0	0	0	0	0	0	0	0	0	0	0	0	0	--	--	--	--	--	--	--	--	--	--	--
HORVU.MOREX.r3.1HG0000220	HORVU.MOREX.r3.1HG0000220	--	0	0	0	0	0	0	0	0	0	0	0	0	0	0	0	0	0	0	0	0	0	0	0	0	0	0	0	0	0	0	0	0	0	0	0	0	--	--	--	--	--	--	--	--	--	--	--
HORVU.MOREX.r3.1HG0000230	HORVU.MOREX.r3.1HG0000230	--	4.86599	44	6.19772	55	12.8034	115	1.0793	10	0.325356	3	0.807035	8	1.5202	16	0.749906	7	1.70123	17	7.4964	63	8.58272	74	8.57489	72	0	0	0	0	0	0	0	0	0	0	0	0	4.53261e-08	-2.52323	down	9.61159e-07	2.11433	up	4.56468e-09	1.92401	up	7.04352e-10	-2.93822
HORVU.MOREX.r3.1HG0000240	HORVU.MOREX.r3.1HG0000240	--	0	0	0	0	0.008874	2	0	0	0	0	0	0	0.020365	3	0	0	0.016119	3	0.018993	3	0	0	0	0	0	0	0	0	0	0	0	0	0	0	0	0	--	--	--	--	--	--	--	--	--	--	--
HORVU.MOREX.r3.1HG0000250	HORVU.MOREX.r3.1HG0000250	--	0.079967	11	0.060919	8	0.07324	10	0.0523	7	0.05685	7	0.080706	11	0.181031	27	0.040993	5	0.075047	11	0.0229	3	0.050289	7	0.088653	11	0	0	0.04945	7	0	0	0	0	0	0	0	0	--	--	--	--	--	--	--	--	--	--	--
HORVU.MOREX.r3.1HG0000260	HORVU.MOREX.r3.1HG0000260	--	0	0	0	0	0	0	0	0	0	0	0	0	0	0	0	0	0.121372	4	0	0	0	0	0	0	0	0	0	0	0	0	0.125652	4	0	0	0.066361	2	--	--	--	--	--	--	--	--	--	--	--
HORVU.MOREX.r3.1HG0000270	HORVU.MOREX.r3.1HG0000270	--	1.34495	32	1.64833	38	2.19556	52	0.938889	21	0.438225	10	0.678397	16	11.3944	297	10.4034	226	15.3574	395	24.0915	525	21.3577	477	16.6936	361	21.2485	508	23.5083	510	17.4689	372	31.3065	700	37.9872	827	37.3924	802	--	--	--	2.09139e-29	-2.72925	down	7.42159e-05	0.699616	normal	1.50017e-62	-4.60251
HORVU.MOREX.r3.1HG0000280	HORVU.MOREX.r3.1HG0000280	--	0	0	0	0	0	0	0.082482	5	0	0	0.067217	4	0.620298	41	0.192321	11	0.332029	22	0.580464	32	0.529165	30	0.845395	46	0.437533	27	0.25597	14	0.31896	18	0.569879	33	0.429847	24	0.532516	29	--	--	--	--	--	--	--	--	--	--	--
HORVU.MOREX.r3.1HG0000290	HORVU.MOREX.r3.1HG0000290	--	0	0	0	0	0	0	0	0	0	0	0	0	0	0	0	0	0	0	0	0	0	0	0	0	0	0	0	0	0	0	0	0	0	0	0	0	--	--	--	--	--	--	--	--	--	--	--
HORVU.MOREX.r3.1HG0000320	HORVU.MOREX.r3.1HG0000320	--	0.046124	2	0.114425	4	0	0	0	0	0.092225	3	0.055251	2	0.505948	17	0.968975	27	0.473592	16	0.812053	23	0.768176	22	0.75216	21	1.76859	54	1.00297	28	1.46198	40	1.9631	56	1.78058	50	2.30811	63	--	--	--	--	--	--	--	--	--	--	--
HORVU.MOREX.r3.1HG0000330	HORVU.MOREX.r3.1HG0000330	LOC109749143	0	0	0.301461	6	0.183287	4	0	0	0.265623	5	0	0	1.0263	23	1.04303	20	0.915184	20	0.698098	13	1.07783	21	0.81751	15	1.28886	26	0.633165	12	1.02769	19	3.55298	67	1.35524	25	1.74158	32	--	--	--	--	--	--	--	--	--	--	--
HORVU.MOREX.r3.1HG0000340	HORVU.MOREX.r3.1HG0000340	--	3.1698	244	2.60572	196	4.24471	327	3.43255	246	2.18797	158	2.93769	228	4.87735	419	5.22477	374	5.11692	434	3.0806	222	3.40063	251	3.24035	232	0.335198	27	0.612328	44	0.464735	33	0	0	0.067611	5	0	0	0.907588	-0.033361	normal	0.000596464	-0.62051	normal	2.0003e-05	-0.620465	normal	0.931807	-0.0218955
HORVU.MOREX.r3.1HG0000350	HORVU.MOREX.r3.1HG0000350	--	22.083	791	22.8791	800	18.6987	671	24.1032	804	25.491	857	22.357	806	23.647	946	22.4149	748	21.0931	833	24.0429	806	23.3803	802	25.2566	840	20.4161	750	19.6985	657	22.5373	737	21.2256	730	23.0118	771	21.2589	701	0.00166857	0.367124	normal	0.350909	-0.112292	normal	0.337474	0.112083	normal	0.20183	0.147526
HORVU.MOREX.r3.1HG0000360	HORVU.MOREX.r3.1HG0000360	LOC109750474	3.97024	102	3.78685	95	4.09434	105	5.31517	127	4.73612	114	2.94544	76	0	0	0	0	0	0	0.192918	5	0.732515	18	0.137067	4	0	0	0	0	0	0	0	0	0	0	0	0	0.309209	0.307618	normal	6.42969e-26	5.34042	up	--	--	--	1.11883e-14	3.45777
HORVU.MOREX.r3.1HG0000370	HORVU.MOREX.r3.1HG0000370	--	0	0	0.010384	1	0	0	0	0	0	0	0	0	0	0	0.115314	2	0.41622	5	0	0	0	0	0	0	1.07256	11	0.699277	7	0.736974	7	0.992378	10	1.03957	10	1.09427	10	--	--	--	--	--	--	--	--	--	--	--
HORVU.MOREX.r3.1HG0000380	HORVU.MOREX.r3.1HG0000380	--	43.315	2187	45.3382	2235	36.873	1864	17.7939	837	22.816	1082	25.9612	1320	83.824	4727	88.3028	4154	84.5514	4706	104.914	4956	102.992	4981	93.4709	4382	110.217	5704	100.472	4721	80.7367	3723	43.1813	2094	48.4015	2285	41.8125	1944	1.93158e-09	-0.713467	normal	2.30595e-54	-1.06459	down	9.97634e-05	0.230647	normal	8.65714e-89	-2.0102
HORVU.MOREX.r3.1HG0000390	HORVU.MOREX.r3.1HG0000390	--	2.40379	83	2.00553	68	2.85032	98	3.09731	99	4.03648	131	3.62546	126	7.59282	291	7.10635	228	7.20689	273	14.1358	454	12.2177	402	10.0276	320	8.65255	305	10.5908	339	9.91536	311	4.98838	165	4.05453	131	4.9853	158	0.00681965	0.722472	normal	2.22023e-14	-1.57205	down	1.27013e-05	0.699324	normal	4.0675e-16	-1.57155
HORVU.MOREX.r3.1HG0000400	HORVU.MOREX.r3.1HG0000400	--	0	0	0	0	0	0	0	0	0	0	0	0	0	0	0	0	0	0	0	0	0	0	0	0	0	0	0	0	0	0	0	0	0	0	0	0	--	--	--	--	--	--	--	--	--	--	--
HORVU.MOREX.r3.1HG0000410	HORVU.MOREX.r3.1HG0000410	--	0	0	0	0	0	0	0	0	0	0	0	0	0	0	0	0	0.037213	3	0	0	0	0	0	0	0	0	0	0	0	0	0	0	0	0	0	0	--	--	--	--	--	--	--	--	--	--	--
HORVU.MOREX.r3.1HG0000420	HORVU.MOREX.r3.1HG0000420	--	32.8127	1612	25.739	1234	30.8147	1515	28.6632	1311	16.8428	777	18.1118	896	51.279	2813	52.0734	2383	51.1337	2768	64.4785	2963	61.7052	2903	77.7778	3547	63.6203	3203	65.0915	2975	81.6179	3661	32.8585	1550	26.9164	1236	28.085	1270	0.355309	-0.27988	normal	2.10068e-22	-0.819949	normal	3.49609e-07	0.396275	normal	2.5715e-07	-1.47684
HORVU.MOREX.r3.1HG0000430	HORVU.MOREX.r3.1HG0000430	--	1.12874	40	1.00892	35	1.09092	39	1.91775	63	1.60183	53	1.60936	57	0.09218	4	2.92251	96	3.03368	118	5.00077	165	5.14427	174	4.1664	137	4.02474	146	0	0	0	0	0.320219	11	1.51937	50	0.0478	2	0.0283624	0.776336	normal	0.49183	-0.484667	normal	0.406452	0.36849	normal	7.36475e-07	-1.29479
HORVU.MOREX.r3.1HG0000440	HORVU.MOREX.r3.1HG0000440	--	0	0	0	0	0	0	0	0	0	0	0	0	0	0	0	0	0	0	0	0	0	0	0	0	0	0	0	0	0	0	0	0	0	0	0	0	--	--	--	--	--	--	--	--	--	--	--
HORVU.MOREX.r3.1HG0000450	HORVU.MOREX.r3.1HG0000450	--	0	0	0	0	0	0	0	0	0	0	0	0	0	0	0	0	0	0	0	0	0	0	0	0	0	0	0	0	0	0	0.036889	2	0	0	0	0	--	--	--	--	--	--	--	--	--	--	--
HORVU.MOREX.r3.1HG0000460	HORVU.MOREX.r3.1HG0000460	--	8.74867	364	7.2306	294	7.11447	297	4.39488	171	4.06106	159	5.05593	212	11.4376	532	12.4731	484	12.137	557	14.4654	563	17.7483	708	16.3333	631	14.4369	616	15.2393	590	14.7489	561	7.48739	300	6.74271	263	8.40061	322	0.00209224	-0.564141	normal	1.23718e-06	-0.668352	normal	0.00056397	0.418863	normal	1.07409e-28	-1.66729
HORVU.MOREX.r3.1HG0000470	HORVU.MOREX.r3.1HG0000470	--	6.09463	338	6.74529	365	6.53594	362	4.02168	208	3.73958	195	5.99282	334	28.878	1784	29.4272	1517	28.0082	1708	27.3849	1417	26.3586	1397	25.1648	1293	26.5437	1505	26.3141	1355	26.7855	1353	8.07835	429	7.52624	390	8.93417	455	0.148461	-0.290933	normal	1.23447e-126	-2.17556	down	0.135654	-0.127748	normal	2.24052e-63	-2.33908
HORVU.MOREX.r3.1HG0000480	HORVU.MOREX.r3.1HG0000480	--	9.50707	347	12.6413	456	13.4426	488	14.6419	493	15.9811	560	15.9874	592	30.0382	1195	22.9973	761	26.4704	1054	44.1516	1464	48.9257	1630	50.1468	1651	35.017	1256	38.1558	1272	36.1235	1187	23.78	814	17.0162	581	20.8955	689	8.08787e-05	0.582323	normal	2.96479e-17	-1.14827	down	1.98153e-17	0.811716	normal	2.18678e-46	-1.39073
HORVU.MOREX.r3.1HG0000490	HORVU.MOREX.r3.1HG0000490	--	10.0166	421	13.1593	540	13.2582	558	7.17253	281	6.45904	255	6.4793	274	11.8517	556	10.5148	412	13.3243	617	12.2971	483	13.3131	536	11.8476	462	14.4131	621	12.5821	492	15.1966	583	12.0803	487	9.15478	360	9.20791	356	3.41651e-05	-0.651681	normal	0.969472	-0.00688818	normal	0.707174	0.0653352	normal	4.28083e-07	-0.729074
HORVU.MOREX.r3.1HG0000500	HORVU.MOREX.r3.1HG0000500	--	0.155589	7	0.255889	12	0.119095	6	0	0	0	0	0	0	0.079537	4	0.007518	1	0.035827	2	0.06643	3	0.12464	6	0.023915	1	0.033731	2	0.050128	3	0	0	0.015523	1	0.023916	1	0	0	--	--	--	--	--	--	--	--	--	--	--
HORVU.MOREX.r3.1HG0000520	HORVU.MOREX.r3.1HG0000520	--	0	0	0	0	0	0	0	0	0	0	0	0	0	0	0	0	0	0	0	0	0	0	0	0	0	0	0	0	0	0	0.037034	4	0	0	0	0	--	--	--	--	--	--	--	--	--	--	--
HORVU.MOREX.r3.1HG0000530	HORVU.MOREX.r3.1HG0000530	LOC109760602	0	0	0	0	0	0	0	0	0	0	0	0	0	0	0	0	0	0	0	0	0	0	0	0	0	0	0	0	0	0	0	0	0	0	0	0	--	--	--	--	--	--	--	--	--	--	--
HORVU.MOREX.r3.1HG0000540	HORVU.MOREX.r3.1HG0000540	--	0	0	0	0	0	0	0	0	0	0	0	0	0	0	0	0	0	0	0	0	0	0	0	0	0	0	0	0	0	0	0	0	0	0	0	0	--	--	--	--	--	--	--	--	--	--	--
HORVU.MOREX.r3.1HG0000550	HORVU.MOREX.r3.1HG0000550	--	0	0	0	0	0	0	0	0	0	0	0	0	0	0	0	0	0	0	0	0	0	0	0	0	0	0	0	0	0	0	0	0	0	0	0	0	--	--	--	--	--	--	--	--	--	--	--
HORVU.MOREX.r3.1HG0000570	HORVU.MOREX.r3.1HG0000570	--	0	0	0	0	0	0	0	0	0	0	0	0	0	0	0	0	0	0	0	0	0	0	0	0	0	0	0	0	0	0	0	0	0	0	0	0	--	--	--	--	--	--	--	--	--	--	--
HORVU.MOREX.r3.1HG0000580	HORVU.MOREX.r3.1HG0000580	--	0	0	0	0	0	0	0	0	0	0	0	0	0	0	0	0	0	0	0	0	0	0	0	0	0	0	0	0	0	0	0	0	0	0	0	0	--	--	--	--	--	--	--	--	--	--	--
HORVU.MOREX.r3.1HG0000590	HORVU.MOREX.r3.1HG0000590	--	1.27104	13	0.80925	8	1.04758	11	0.612534	6	0.705982	7	0.809519	9	2.0131	23	1.38958	13	0.830602	10	0.747582	7	0.594763	6	0.752464	7	1.76079	18	1.96785	19	0.932317	9	0.94663	9	1.93095	18	0.825658	8	--	--	--	--	--	--	--	--	--	--	--
HORVU.MOREX.r3.1HG0000600	HORVU.MOREX.r3.1HG0000600	LOC109750480	0.627285	52	0.609934	49	0.76231	63	0.504223	39	0.388606	31	0.268066	23	0.479369	45	0.799164	62	0.606456	56	0.280922	22	0.190236	15	0.367224	29	0.506575	43	0.740604	57	1.12806	85	0.509155	41	0.531045	41	0.568241	44	0.215936	-0.505498	normal	0.935881	0.0339992	normal	0.0194287	-0.858638	normal	--	--
HORVU.MOREX.r3.1HG0000610	HORVU.MOREX.r3.1HG0000610	--	41.898	1884	45.6116	2002	40.7359	1834	43.9675	1841	39.6543	1674	40.4522	1831	65.0911	3268	63.0865	2643	60.1058	2979	54.9288	2311	50.643	2181	51.7254	2160	51.512	2374	54.6109	2285	52.9375	2174	44.3413	1914	38.7162	1627	42.3588	1754	0.102812	0.145964	normal	1.5922e-19	-0.588018	normal	7.87257e-05	-0.257308	normal	0.0343543	-0.179183
HORVU.MOREX.r3.1HG0000620	HORVU.MOREX.r3.1HG0000620	AML6	49.1371	6208	47.2973	5836	46.075	5827	33.8913	3992	34.7396	4123	39.3303	5017	47.4182	6697	48.4954	5709	46.1138	6422	55.6589	6581	55.8604	6756	56.6851	6664	54.8301	7101	58.7415	6908	54.298	6271	56.8103	6898	56.0673	6664	56.0734	6523	0.00501372	-0.204014	normal	0.589143	-0.0307472	normal	2.35524e-08	0.243768	normal	1.82379e-13	-0.475636
HORVU.MOREX.r3.1HG0000630	HORVU.MOREX.r3.1HG0000630	--	38.6192	3764	36.5119	3474	40.2469	3927	60.1103	5456	57.6227	5274	64.2153	6301	25.1686	2740	22.6448	2057	23.3242	2506	29.5499	2695	26.729	2496	26.9561	2440	13.3013	1329	14.3949	1306	13.961	1243	7.69403	720	9.73401	887	8.63225	775	1.46208e-36	0.847953	normal	2.22172e-24	0.659985	normal	0.00188604	0.224454	normal	1.7273e-82	1.2886
HORVU.MOREX.r3.1HG0000640	HORVU.MOREX.r3.1HG0000640	--	0.606072	15	0.577849	14	0.861281	21	7.47316	163	8.25143	181	12.7553	300	0	0	0.086528	2	0	0	0.183353	4	0.084175	2	0.154557	4	0	0	0	0	0	0	0	0	0	0	0	0	3.19348e-34	3.63646	up	--	--	--	--	--	--	3.6085e-36	5.66259
HORVU.MOREX.r3.1HG0000650	HORVU.MOREX.r3.1HG0000650	--	0.134824	2	0	0	0.54341	7	2.00124	22	1.54499	17	2.13527	25	0	0	0	0	0	0	0	0	0.06516	1	0	0	0	0	0	0	0	0	0	0	0	0	0	0	--	--	--	--	--	--	--	--	--	--	--
HORVU.MOREX.r3.1HG0000660	HORVU.MOREX.r3.1HG0000660	--	17.0545	1373	17.5405	1379	16.422	1324	20.4968	1537	17.2704	1306	19.7302	1599	14.8777	1338	14.5501	1092	14.39	1277	15.8398	1193	14.3656	1108	13.1156	981	15.0532	1243	15.2409	1142	13.6388	1003	17.4006	1345	16.3309	1229	16.4084	1217	8.80889e-05	0.364721	normal	0.0243623	0.182784	normal	0.903966	-0.0160201	normal	2.79842e-08	0.569206
HORVU.MOREX.r3.1HG0000670	HORVU.MOREX.r3.1HG0000670	--	30.1791	1434	31.1499	1445	29.9036	1422	30.3176	1341	33.999	1517	33.7675	1615	19.519	1036	19.5247	865	19.3461	1013	27.6168	1228	24.9338	1135	22.5053	993	21.5223	1048	22.175	981	21.362	927	26.9715	1230	26.5335	1179	25.8449	1131	0.000542952	0.296886	normal	8.42482e-15	0.605175	normal	0.000302838	0.356939	normal	2.90205e-08	0.546131
HORVU.MOREX.r3.1HG0000680	HORVU.MOREX.r3.1HG0000680	--	0.24819	12	0.674332	32	0.678201	33	0.704082	32	0.415073	19	0.557315	27	1.61646	87	1.64798	74	1.82641	97	3.13884	141	2.50254	115	2.10791	94	3.55762	175	2.66814	120	2.11603	93	2.22708	103	2.24606	101	1.37002	61	--	--	--	3.73309e-05	-1.52377	down	0.0455925	0.53473	normal	1.01739e-08	-1.9554
HORVU.MOREX.r3.1HG0000690	HORVU.MOREX.r3.1HG0000690	--	0.63335	75	0.607382	70	0.888879	105	0.054984	7	0.190716	21	0.078055	10	0.125024	17	0.135271	15	0.119232	16	0.029898	4	0.016382	2	0.128324	14	0.130942	16	0.018327	2	0.03735	5	0	0	0	0	0.037047	5	1.08121e-07	-2.14505	down	2.26748e-09	2.17604	up	--	--	--	--	--
HORVU.MOREX.r3.1HG0000700	HORVU.MOREX.r3.1HG0000700	--	0	0	0	0	0	0	0	0	0	0	0	0	0	0	0	0	0	0	0	0	0	0	0	0	0	0	0	0	0	0	0	0	0	0	0	0	--	--	--	--	--	--	--	--	--	--	--
HORVU.MOREX.r3.1HG0000710	HORVU.MOREX.r3.1HG0000710	LOC109787306	0	0	0	0	0	0	0	0	0	0	0	0	0	0	0	0	0	0	0	0	0	0	0	0	0	0	0	0	0	0	0	0	0	0	0	0	--	--	--	--	--	--	--	--	--	--	--
HORVU.MOREX.r3.1HG0000720	HORVU.MOREX.r3.1HG0000720	--	0	0	0	0	0	0	0	0	0	0	0	0	0	0	0	0	0	0	0	0	0	0	0	0	0	0	0	0	0	0	0	0	0	0	0	0	--	--	--	--	--	--	--	--	--	--	--
HORVU.MOREX.r3.1HG0000730	HORVU.MOREX.r3.1HG0000730	--	0.030236	5	0.025761	4	0.063375	9	0	0	0	0	0	0	0	0	0	0	0	0	0	0	0	0	0	0	0	0	0	0	0	0	0	0	0	0	0	0	--	--	--	--	--	--	--	--	--	--	--
HORVU.MOREX.r3.1HG0000740	HORVU.MOREX.r3.1HG0000740	--	0	0	0	0	0	0	0	0	0	0	0	0	0	0	0	0	0	0	0	0	0	0	0	0	0	0	0	0	0	0	0	0	0	0	0	0	--	--	--	--	--	--	--	--	--	--	--
HORVU.MOREX.r3.1HG0000760	HORVU.MOREX.r3.1HG0000760	LOC109732027	0	0	0	0	0	0	0.575386	7	0	0	0	0	0	0	0	0	0	0	0	0	0	0	0	0	0	0	0	0	0	0	0	0	0	0	0	0	--	--	--	--	--	--	--	--	--	--	--
HORVU.MOREX.r3.1HG0000770	HORVU.MOREX.r3.1HG0000770	--	0	0	0	0	0	0	0	0	0	0	0	0	0	0	0	0	0	0	0	0	0	0	0	0	0	0	0	0	0	0	0	0	0	0	0	0	--	--	--	--	--	--	--	--	--	--	--
HORVU.MOREX.r3.1HG0000780	HORVU.MOREX.r3.1HG0000780	LOC102682035	28.6115	883	26.6175	802	36.8885	1139	2361.62	67796	2348.75	67995	2549.65	79134	0	0	0	0	0	0	0	0	0	0	5.23261	150	0	0	0.06971	2	0	0	0	0	0.05876	2	0.058479	2	0	6.37636	up	7.46066e-84	8.25409	up	--	--	--	0.17374	1.24798
HORVU.MOREX.r3.1HG0000790	HORVU.MOREX.r3.1HG0000790	--	0	0	0	0	0	0	1.75193	13	1.77418	13	1.89198	15	0	0	0	0	0	0	0	0	0	0	0	0	0	0	0	0	0	0	0	0	0	0	0	0	--	--	--	--	--	--	--	--	--	--	--
HORVU.MOREX.r3.1HG0000800	HORVU.MOREX.r3.1HG0000800	--	27.8469	956	33.038	1107	34.6876	1192	2727.69	87133	2790.96	89904	3026.15	104511	0	0	0.112001	4	0	0	0	0	0	0	6.82157	218	0	0	0.062439	2	0	0	0.035927	2	0	0	0.040735	2	0	6.64989	up	1.46935e-100	7.98553	up	--	--	--	0.199762	1.16508
HORVU.MOREX.r3.1HG0000810	HORVU.MOREX.r3.1HG0000810	--	18.0229	696	17.9608	677	20.0773	776	1197.09	42988	1289.64	46702	1324.12	51409	0	0	0	0	0	0	0	0	0	0	2.71479	98	0	0	0	0	0	0	0	0	0	0	0	0	0	6.25848	up	6.50006e-76	7.93716	up	--	--	--	0.142067	1.36074
HORVU.MOREX.r3.1HG0000850	HORVU.MOREX.r3.1HG0000850	--	102.763	4540	95.8675	4134	102.102	4516	100.069	4116	100.255	4159	99.8485	4441	74.309	3666	75.3455	3101	72.94	3552	72.7562	3007	74.07	3134	74.7799	3068	58.468	2648	54.4363	2238	55.292	2231	47.821	2029	48.707	2012	47.3819	1928	0.00364406	0.190403	normal	5.5912e-13	0.398322	normal	0.935806	-0.00629889	normal	8.40166e-24	0.599806
HORVU.MOREX.r3.1HG0000860	HORVU.MOREX.r3.1HG0000860	--	0	0	0	0	0.071763	2	6.66373	171	7.83995	203	7.34356	204	0	0	0	0	0	0	0	0	0	0	0	0	0	0	0	0	0	0	0	0	0	0	0	0	1.20306e-42	6.05778	up	--	--	--	--	--	--	5.72733e-28	7.38065
HORVU.MOREX.r3.1HG0000870	HORVU.MOREX.r3.1HG0000870	--	0.061373	5	0.157187	11	0.179218	12	1.74474	106	1.64596	101	2.82456	186	0.027478	2	0.032936	2	0.229939	17	0.310851	19	0.096121	6	0.132192	8	0.060074	5	0.065953	5	0	0	0	0	0	0	0.033329	2	3.51567e-23	3.59067	up	--	--	--	--	--	--	3.12209e-18	3.49404
HORVU.MOREX.r3.1HG0000880	HORVU.MOREX.r3.1HG0000880	LOC104582784	12.2389	259	14.5209	300	11.0409	234	14.9325	294	11.7156	233	11.9021	253	20.8602	492	23.8125	469	24.4262	569	22.3243	441	19.8484	402	18.3461	360	26.2667	569	28.4927	560	25.0868	484	23.3939	475	28.374	560	23.3109	454	0.275722	0.217186	normal	1.47449e-09	-0.890991	normal	0.241671	-0.184953	normal	0.00473641	-0.482702
HORVU.MOREX.r3.1HG0000890	HORVU.MOREX.r3.1HG0000890	--	0	0	0	0	0	0	0	0	0	0	0.060239	1	0	0	0	0	0	0	0	0	0	0	0	0	0	0	0	0	0	0	0	0	0	0	0	0	--	--	--	--	--	--	--	--	--	--	--
HORVU.MOREX.r3.1HG0000900	HORVU.MOREX.r3.1HG0000900	--	0	0	0	0	0	0	0	0	0	0	0	0	0	0	0	0	0	0	0	0	0	0	0	0	0	0	0	0	0	0	0	0	0	0	0	0	--	--	--	--	--	--	--	--	--	--	--
HORVU.MOREX.r3.1HG0000910	HORVU.MOREX.r3.1HG0000910	--	0	0	0	0	0	0	0	0	0	0	0	0	0	0	0.136761	3	0	0	0	0	0	0	0	0	0	0	0	0	0	0	0	0	0	0	0	0	--	--	--	--	--	--	--	--	--	--	--
HORVU.MOREX.r3.1HG0000920	HORVU.MOREX.r3.1HG0000920	--	0	0	0	0	0	0	0	0	0	0	0	0	0	0	0	0	0	0	0	0	0	0	0	0	0	0	0	0	0	0	0	0	0	0	0	0	--	--	--	--	--	--	--	--	--	--	--
HORVU.MOREX.r3.1HG0000930	HORVU.MOREX.r3.1HG0000930	--	0	0	0	0	0	0	0	0	0	0	0	0	0	0	0	0	0	0	0	0	0	0	0	0	0	0	0	0	0	0	0	0	0	0	0	0	--	--	--	--	--	--	--	--	--	--	--
HORVU.MOREX.r3.1HG0000940	HORVU.MOREX.r3.1HG0000940	--	0	0	0	0	0	0	0	0	0	0	0	0	0	0	0	0	0	0	0	0	0	0	0	0	0	0	0	0	0	0	0	0	0	0	0	0	--	--	--	--	--	--	--	--	--	--	--
HORVU.MOREX.r3.1HG0000950	HORVU.MOREX.r3.1HG0000950	--	1.26403	171	1.36649	180	1.76535	239	3.71972	467	3.35696	425	4.31749	586	5.62621	847	5.39401	678	5.46377	812	8.57874	1082	7.0564	911	8.7613	1097	1.96667	272	2.35254	295	1.98317	244	1.27024	165	1.03527	131	1.10187	137	1.44231e-20	1.53268	up	2.563e-43	-1.91105	down	7.58004e-08	0.554549	normal	1.17932e-13	-0.930828
HORVU.MOREX.r3.1HG0000970	HORVU.MOREX.r3.1HG0000970	--	0	0	0	0	0	0	0	0	0	0	0	0	0.016923	1	0.074211	2	0.130049	3	0	0	0	0	0	0	0.264426	4	0	0	0	0	0.010563	1	0	0	0	0	--	--	--	--	--	--	--	--	--	--	--
HORVU.MOREX.r3.1HG0000980	HORVU.MOREX.r3.1HG0000980	LOC104703636	0.285489	6	0.666831	14	0.557581	12	0	0	0	0	0	0	0	0	0.096762	2	0	0	0	0	0	0	0	0	0.023392	1	0	0	0	0	0	0	0	0	0	0	--	--	--	--	--	--	--	--	--	--	--
HORVU.MOREX.r3.1HG0000990	HORVU.MOREX.r3.1HG0000990	--	0.323242	55	0.323957	54	0.332388	57	0.044226	7	0.038192	7	0	0	0.0212	4	0.10613	17	0.026417	5	0.117804	19	0.067401	11	0.054074	9	0.119334	21	0.281935	45	0.116272	18	0.123337	21	0.120861	20	0.055028	9	9.5827e-08	-2.58686	down	3.30923e-06	2.17524	up	--	--	--	--	--
HORVU.MOREX.r3.1HG0001000	HORVU.MOREX.r3.1HG0001000	--	0	0	0	0	0	0	0	0	0	0	0	0	0	0	0	0	0	0	0	0	0	0	0	0	0	0	0	0	0	0	0	0	0	0	0	0	--	--	--	--	--	--	--	--	--	--	--
HORVU.MOREX.r3.1HG0001010	HORVU.MOREX.r3.1HG0001010	--	0.022816	4	0	0	0	0	0	0	0	0	0	0	0	0	0	0	0	0	0	0	0	0	0	0	0	0	0	0	0	0	0	0	0.031894	5	0	0	--	--	--	--	--	--	--	--	--	--	--
HORVU.MOREX.r3.1HG0001020	HORVU.MOREX.r3.1HG0001020	--	0.197882	31	0.144539	22	0.171878	27	0	0	0	0	0	0	0	0	0	0	0	0	0	0	0	0	0	0	0	0	0	0	0	0	0	0	0	0	0	0	--	--	--	--	--	--	--	--	--	--	--
HORVU.MOREX.r3.1HG0001030	HORVU.MOREX.r3.1HG0001030	--	0.034627	6	0	0	0.018036	4	0.024326	4	0.026011	5	0	0	0.163586	31	0.171268	27	0.076656	15	0.114301	18	0.182699	30	0.108763	17	0.096099	17	0.058166	9	0.026274	4	0.070378	12	0.131786	21	0.080753	13	--	--	--	--	--	--	--	--	--	--	--
HORVU.MOREX.r3.1HG0001040	HORVU.MOREX.r3.1HG0001040	--	0	0	0	0	0	0	0	0	0	0	0	0	0	0	0	0	0	0	0	0	0	0	0	0	0	0	0	0	0	0	0	0	0	0	0	0	--	--	--	--	--	--	--	--	--	--	--
HORVU.MOREX.r3.1HG0001050	HORVU.MOREX.r3.1HG0001050	LOC109742914	0.095396	2	0	0	0	0	0	0	0	0	0	0	0	0	0	0	0	0	0.163155	4	0	0	0	0	0	0	0	0	0	0	0	0	0	0	0	0	--	--	--	--	--	--	--	--	--	--	--
HORVU.MOREX.r3.1HG0001060	HORVU.MOREX.r3.1HG0001060	--	0.0746	1	0.076425	1	0	0	0	0	0.08673	2	0	0	0	0	0	0	0	0	0	0	0	0	0	0	0	0	0	0	0	0	0	0	0	0	0	0	--	--	--	--	--	--	--	--	--	--	--
HORVU.MOREX.r3.1HG0001070	HORVU.MOREX.r3.1HG0001070	--	7.72664	121	7.06303	108	4.25897	67	112.419	1632	133.699	1957	116.205	1823	0	0	0	0	0	0	0	0	0	0	0.053904	1	0.05676	1	0	0	0	0	0	0	0	0	0	0	4.74869e-211	4.36906	up	1.54896e-24	5.24781	up	--	--	--	8.84345e-74	9.99998
HORVU.MOREX.r3.1HG0001080	HORVU.MOREX.r3.1HG0001080	LOC102682042	157.207	3050	157.91	2990	158.887	3086	7274.22	131370	7363.47	134101	8764.5	171128	0	0	0.052017	1	0.0132	1	0	0	0.026916	1	14.5267	262	0.099592	2	0.055405	1	0.015557	1	0	0	0	0	0.111997	3	0	5.79898	up	1.80757e-145	9.56583	up	--	--	--	0.0705499	1.70624
HORVU.MOREX.r3.1HG0001100	HORVU.MOREX.r3.1HG0001100	LOC548231	27.0077	421	28.891	440	28.847	451	1267.1	18387	1137.65	16647	1387.08	21761	0	0	0	0	0.061446	2	0	0	0.022333	1	2.34395	34	0	0	0	0	0	0	0.022131	1	0	0	0	0	0	5.64845	up	5.89362e-63	7.02496	up	--	--	--	0.00148571	2.98284
HORVU.MOREX.r3.1HG0001110	HORVU.MOREX.r3.1HG0001110	--	42.7579	825	47.3249	891	43.7256	845	2342.87	42067	2261.82	40954	2206.39	42831	0	0	0	0	0.001882	1	0.055432	2	0	0	4.67601	84	0.005396	1	0.028978	1	0	0	0.028807	1	0.089879	2	0	0	0	5.84721	up	1.51128e-84	8.0318	up	--	--	--	0.00960944	2.45523
HORVU.MOREX.r3.1HG0001120	HORVU.MOREX.r3.1HG0001120	--	27.176	1106	29.9145	1189	30.2996	1235	27.3975	1039	27.1107	1036	24.2881	996	32.8907	1495	30.7894	1168	29.1002	1306	34.3096	1307	30.0072	1170	32.3518	1223	24.1084	1006	26.0491	987	22.3216	830	27.2955	1067	26.9475	1026	27.1639	1018	0.707426	0.0445934	normal	0.204483	-0.121183	normal	0.60777	0.0586037	normal	0.229485	-0.131248
HORVU.MOREX.r3.1HG0001130	HORVU.MOREX.r3.1HG0001130	--	35.6201	2395	34.774	2283	37.0776	2496	36.588	2291	34.251	2163	38.2276	2588	20.9217	1571	22.3549	1401	24.2905	1801	20.8728	1313	22.828	1470	23.6518	1477	14.2641	983	15.0695	943	12.2616	753	15.7727	1019	15.5703	979	15.7983	978	0.00624486	0.214272	normal	3.974e-17	0.631351	normal	0.964428	-0.00560916	normal	1.7057e-26	0.856429
HORVU.MOREX.r3.1HG0001140	HORVU.MOREX.r3.1HG0001140	--	23.8468	458	26.3944	494	20.4757	393	15.0659	269	19.8242	357	16.9394	327	24.8524	533	24.4451	437	23.5859	499	30.3881	546	29.041	534	24.5341	437	31.0519	611	28.9831	518	28.6133	501	36.0878	665	28.038	503	30.6691	542	0.141304	-0.250091	normal	0.605473	-0.0800325	normal	0.172327	0.199261	normal	0.000734123	-0.531696
HORVU.MOREX.r3.1HG0001150	HORVU.MOREX.r3.1HG0001150	--	27.5247	1040	32.9077	1214	24.1414	914	18.2806	644	19.0091	675	18.7848	715	28.9139	1220	26.1794	922	28.0725	1170	27.9192	987	29.9971	1086	28.5298	1001	31.294	1212	35.5055	1249	34.5559	1193	37.7686	1371	35.1335	1241	35.0715	1221	0.0012717	-0.393091	normal	0.92087	-0.0133023	normal	0.641582	0.0538269	normal	4.24219e-06	-0.459569
HORVU.MOREX.r3.1HG0001180	HORVU.MOREX.r3.1HG0001180	--	0	0	0	0	0	0	0	0	0	0	0	0	0	0	0	0	0	0	0	0	0	0	0	0	0	0	0	0	0	0	0	0	0	0	0	0	--	--	--	--	--	--	--	--	--	--	--
HORVU.MOREX.r3.1HG0001190	HORVU.MOREX.r3.1HG0001190	--	0	0	0	0	0	0	0	0	0	0	0	0	0	0	0	0	0	0	0	0	0	0	0	0	0	0	0	0	0	0	0	0	0	0	0	0	--	--	--	--	--	--	--	--	--	--	--
HORVU.MOREX.r3.1HG0001210	HORVU.MOREX.r3.1HG0001210	--	0	0	0	0	0	0	0	0	0	0	0	0	0	0	0	0	0	0	0	0	0	0	0	0	0	0	0	0	0	0	0	0	0	0	0	0	--	--	--	--	--	--	--	--	--	--	--
HORVU.MOREX.r3.1HG0001220	HORVU.MOREX.r3.1HG0001220	--	1.74862	28	2.95535	46	3.74984	59	2355.16	34421	2628.21	38734	2654.55	41944	0	0	0	0	0	0	0	0	0.004435	1	5.00354	73	0.033702	1	0.060554	1	0	0	0	0	0	0	0.003921	1	2.87523e-289	9.44095	up	--	--	--	--	--	--	0.015319	2.30186
HORVU.MOREX.r3.1HG0001230	HORVU.MOREX.r3.1HG0001230	--	12.7304	426	17.3398	566	25.426	851	2784.43	86620	2982.83	93573	2940.58	98900	0	0	0	0	0	0	0.085532	3	0.08813	3	5.88024	183	0.058401	2	0.004932	1	0.032776	1	0.093527	4	0	0	0	0	1.03403e-142	7.02725	up	5.34627e-49	7.08271	up	--	--	--	0.00017616	3.47271
HORVU.MOREX.r3.1HG0001250	HORVU.MOREX.r3.1HG0001250	--	0	0	0	0	0	0	0	0	0	0	0	0	0	0	0	0	0	0	0	0	0	0	0	0	0	0	0	0	0	0	0	0	0	0	0	0	--	--	--	--	--	--	--	--	--	--	--
HORVU.MOREX.r3.1HG0001260	HORVU.MOREX.r3.1HG0001260	--	0	0	0	0	0	0	0	0	0	0	0	0	0	0	0	0	0	0	0	0	0	0	0	0	0	0	0	0	0	0	0	0	0	0	0	0	--	--	--	--	--	--	--	--	--	--	--
HORVU.MOREX.r3.1HG0001270	HORVU.MOREX.r3.1HG0001270	--	0	0	0	0	0	0	0	0	0	0	0	0	0	0	0	0	0	0	0	0	0	0	0	0	0	0	0	0	0	0	0	0	0	0	0	0	--	--	--	--	--	--	--	--	--	--	--
HORVU.MOREX.r3.1HG0001280	HORVU.MOREX.r3.1HG0001280	--	2.21732	63	2.03933	57	1.42769	41	0.62618	17	0	0	0.141813	5	0	0	0.15297	5	0.216415	7	0	0	0	0	0	0	0	0	0	0	0	0	0	0	0	0	0	0	0.000151759	-1.97449	down	2.18679e-09	2.92762	up	--	--	--	--	--
HORVU.MOREX.r3.1HG0001290	HORVU.MOREX.r3.1HG0001290	--	0	0	0	0	0	0	0	0	0	0	0	0	0	0	0	0	0	0	0	0	0	0	0	0	0	0	0	0	0	0	0	0	0	0	0	0	--	--	--	--	--	--	--	--	--	--	--
HORVU.MOREX.r3.1HG0001300	HORVU.MOREX.r3.1HG0001300	--	0	0	0	0	0	0	0	0	0	0	0	0	0	0	0	0	0	0	0	0	0	0	0	0	0	0	0	0	0	0	0	0	0	0	0	0	--	--	--	--	--	--	--	--	--	--	--
HORVU.MOREX.r3.1HG0001320	HORVU.MOREX.r3.1HG0001320	--	0	0	0	0	0	0	0	0	0	0	0	0	0	0	0	0	0	0	0	0	0	0	0	0	0	0	0	0	0	0	0	0	0	0	0	0	--	--	--	--	--	--	--	--	--	--	--
HORVU.MOREX.r3.1HG0001330	HORVU.MOREX.r3.1HG0001330	--	1.05863	17	2.63127	41	1.51551	24	268.316	3922	284.539	4194	267.826	4232	0	0	0	0	0	0	0	0	0	0	0.198522	3	0	0	0	0	0	0	0	0	0	0	0	0	1.5502e-199	7.13449	up	--	--	--	--	--	--	8.38061e-112	10.7086
HORVU.MOREX.r3.1HG0001340	HORVU.MOREX.r3.1HG0001340	--	0	0	0	0	0	0	0	0	0	0	0	0	0	0	0	0	0	0	0	0	0	0	0	0	0	0	0	0	0	0	0	0	0	0	0	0	--	--	--	--	--	--	--	--	--	--	--
HORVU.MOREX.r3.1HG0001350	HORVU.MOREX.r3.1HG0001350	--	0	0	0	0	0	0	0	0	0	0	0	0	0	0	0	0	0	0	0	0	0	0	0	0	0	0	0	0	0	0	0	0	0	0	0	0	--	--	--	--	--	--	--	--	--	--	--
HORVU.MOREX.r3.1HG0001370	HORVU.MOREX.r3.1HG0001370	--	0	0	0	0	0	0	0	0	0	0	0	0	0	0	0	0	0	0	0	0	0	0	0	0	0	0	0	0	0	0	0	0	0	0	0	0	--	--	--	--	--	--	--	--	--	--	--
HORVU.MOREX.r3.1HG0001390	HORVU.MOREX.r3.1HG0001390	--	0	0	0	0	0	0	0	0	0	0	0	0	0	0	0	0	0	0	0	0	0	0	0	0	0	0	0	0	0	0	0	0	0	0	0	0	--	--	--	--	--	--	--	--	--	--	--
HORVU.MOREX.r3.1HG0001400	HORVU.MOREX.r3.1HG0001400	--	0	0	0	0	0	0	0	0	0	0	0	0	0	0	0	0	0	0	0	0	0	0	0	0	0	0	0	0	0	0	0	0	0	0	0	0	--	--	--	--	--	--	--	--	--	--	--
HORVU.MOREX.r3.1HG0001410	HORVU.MOREX.r3.1HG0001410	LOC109767856	0	0	0	0	0	0	0	0	0	0	0	0	0	0	0	0	0	0	0	0	0	0	0	0	0	0	0	0	0	0	0	0	0	0	0	0	--	--	--	--	--	--	--	--	--	--	--
HORVU.MOREX.r3.1HG0001420	HORVU.MOREX.r3.1HG0001420	--	10.1688	341	13.3096	436	11.2115	377	30.3118	947	25.8017	813	22.6638	765	0	0	0	0	0	0	0	0	0	0	0.05997	2	0	0	0	0	0	0	0	0	0	0	0	0	7.18716e-23	1.35881	up	3.68627e-56	7.12219	up	--	--	--	3.15117e-59	8.77463
HORVU.MOREX.r3.1HG0001430	HORVU.MOREX.r3.1HG0001430	--	0	0	0	0	0	0	11.206	158	5.3169	76	4.73501	73	0	0	0	0	0	0	0	0	0	0	0	0	0	0	0	0	0	0	0	0	0	0	0	0	5.72363e-26	5.35454	up	--	--	--	--	--	--	2.17806e-19	6.47742
HORVU.MOREX.r3.1HG0001440	HORVU.MOREX.r3.1HG0001440	--	0	0	0	0	0	0	0	0	0	0	0	0	0	0	0	0	0	0	0	0	0	0	0	0	0	0	0	0	0	0	0	0	0	0	0	0	--	--	--	--	--	--	--	--	--	--	--
HORVU.MOREX.r3.1HG0001450	HORVU.MOREX.r3.1HG0001450	--	0	0	0	0	0	0	0	0	0	0	0	0	0	0	0	0	0	0	0	0	0	0	0	0	0	0	0	0	0	0	0	0	0	0	0	0	--	--	--	--	--	--	--	--	--	--	--
HORVU.MOREX.r3.1HG0001460	HORVU.MOREX.r3.1HG0001460	LOC109767856	0	0	0	0	0	0	0	0	0	0	0.069497	4	0	0	0	0	0	0	0	0	0	0	0	0	0.067744	4	0	0	0	0	0	0	0	0	0.037964	2	--	--	--	--	--	--	--	--	--	--	--
HORVU.MOREX.r3.1HG0001470	HORVU.MOREX.r3.1HG0001470	--	0.021815	3	0.074629	10	0.101218	14	0	0	0	0	0	0	0	0	0	0	0	0	0	0	0	0	0	0	0.014347	2	0	0	0.062269	8	0.068931	9	0.016049	3	0.063893	9	--	--	--	--	--	--	--	--	--	--	--
HORVU.MOREX.r3.1HG0001480	HORVU.MOREX.r3.1HG0001480	--	0	0	0	0	0	0	0	0	0	0	0	0	0	0	0	0	0	0	0	0	0	0	0	0	0.22056	3	0.460591	5	0.286245	3	0.943138	11	0.641218	7	0.285196	3	--	--	--	--	--	--	--	--	--	--	--
HORVU.MOREX.r3.1HG0001490	HORVU.MOREX.r3.1HG0001490	--	0	0	0	0	0	0	0	0	0	0	0	0	0	0	0	0	0	0	0	0	0	0	0	0	0	0	0	0	0	0	0	0	0	0	0	0	--	--	--	--	--	--	--	--	--	--	--
HORVU.MOREX.r3.1HG0001500	HORVU.MOREX.r3.1HG0001500	--	0	0	0.079459	2	0	0	0.842657	11	0.583075	8	0.84551	11	0	0	0	0	0	0	0	0	0.158726	2	0	0	0	0	0	0	0	0	0	0	0	0	0	0	--	--	--	--	--	--	--	--	--	--	--
HORVU.MOREX.r3.1HG0001510	HORVU.MOREX.r3.1HG0001510	--	0.230055	27	0.263467	30	0.242891	29	0	0	0	0	0	0	0	0	0	0	0	0	0	0	0	0	0	0	0	0	0	0	0	0	0	0	0	0	0	0	--	--	--	--	--	--	--	--	--	--	--
HORVU.MOREX.r3.1HG0001530	HORVU.MOREX.r3.1HG0001530	--	0.00394	1	0.031832	2	0.015742	1	0.192729	12	0.202085	13	0.103178	7	0.067936	5	0.265806	16	0.136389	10	0.113919	7	0.031669	2	0.140071	9	0.263098	18	0.235778	14	0.197161	12	0.295504	19	0.229594	14	0.087647	6	--	--	--	--	--	--	--	--	--	--	--
HORVU.MOREX.r3.1HG0001540	HORVU.MOREX.r3.1HG0001540	--	0	0	0	0	0	0	0	0	0	0	0	0	0	0	0	0	0	0	0	0	0	0	0	0	0.105015	5	0.05536	3	0	0	0.173159	8	0.298223	13	0	0	--	--	--	--	--	--	--	--	--	--	--
HORVU.MOREX.r3.1HG0001550	HORVU.MOREX.r3.1HG0001550	--	0	0	0	0	0	0	0	0	0	0	0	0	0	0	0	0	0	0	0	0	0	0	0	0	0	0	0	0	0	0	0	0	0	0	0	0	--	--	--	--	--	--	--	--	--	--	--
HORVU.MOREX.r3.1HG0001560	HORVU.MOREX.r3.1HG0001560	--	0	0	0	0	0	0	0	0	0	0	0	0	0	0	0	0	0	0	0	0	0	0	0	0	0	0	0	0	0	0	0	0	0	0	0	0	--	--	--	--	--	--	--	--	--	--	--
HORVU.MOREX.r3.1HG0001570	HORVU.MOREX.r3.1HG0001570	--	0	0	0	0	0	0	0	0	0	0	0	0	0	0	0	0	0	0	0	0	0	0	0	0	0	0	0	0	0	0	0	0	0	0	0	0	--	--	--	--	--	--	--	--	--	--	--
HORVU.MOREX.r3.1HG0001580	HORVU.MOREX.r3.1HG0001580	--	0	0	0	0	0	0	0	0	0	0	0	0	0	0	0	0	0	0	0	0	0	0	0	0	0	0	0	0	0	0	0	0	0	0	0	0	--	--	--	--	--	--	--	--	--	--	--
HORVU.MOREX.r3.1HG0001590	HORVU.MOREX.r3.1HG0001590	--	0	0	0	0	0	0	0	0	0	0	0	0	0	0	0	0	0	0	0	0	0	0	0	0	0	0	0	0	0	0	0	0	0	0	0	0	--	--	--	--	--	--	--	--	--	--	--
HORVU.MOREX.r3.1HG0001600	HORVU.MOREX.r3.1HG0001600	--	0	0	0	0	0	0	0	0	0	0	0	0	0	0	0	0	0	0	0	0	0	0	0	0	0	0	0	0	0	0	0	0	0	0	0	0	--	--	--	--	--	--	--	--	--	--	--
HORVU.MOREX.r3.1HG0001610	HORVU.MOREX.r3.1HG0001610	--	0	0	0	0	0	0	0	0	0	0	0	0	0	0	0	0	0	0	0	0	0	0	0	0	0	0	0	0	0	0	0	0	0	0	0	0	--	--	--	--	--	--	--	--	--	--	--
HORVU.MOREX.r3.1HG0001620	HORVU.MOREX.r3.1HG0001620	--	0	0	0	0	0	0	0	0	0	0	0	0	0	0	0	0	0	0	0	0	0	0	0	0	0	0	0	0	0	0	0	0	0	0	0	0	--	--	--	--	--	--	--	--	--	--	--
HORVU.MOREX.r3.1HG0001630	HORVU.MOREX.r3.1HG0001630	--	0	0	0	0	0	0	0	0	0	0	0	0	0	0	0	0	0	0	0	0	0	0	0	0	0	0	0	0	0	0	0	0	0	0	0	0	--	--	--	--	--	--	--	--	--	--	--
HORVU.MOREX.r3.1HG0001640	HORVU.MOREX.r3.1HG0001640	--	0	0	0	0	0	0	0	0	0	0	0	0	0	0	0	0	0	0	0	0	0	0	0	0	0	0	0.212264	9	0.059796	3	0.111607	5	0	0	0.317115	14	--	--	--	--	--	--	--	--	--	--	--
HORVU.MOREX.r3.1HG0001650	HORVU.MOREX.r3.1HG0001650	--	1.18853	85	1.90473	133	1.10378	79	0.983807	66	0.577562	39	0.373972	27	1.13435	91	0.72683	49	0.993006	78	0.168941	12	0.17042	12	0.248257	17	0.221419	17	0.08926	6	0.274471	18	0.063723	5	0	0	0.04831	4	0.0265638	-0.826253	normal	0.145532	0.475833	normal	6.56794e-07	-1.66633	down	--	--
HORVU.MOREX.r3.1HG0001660	HORVU.MOREX.r3.1HG0001660	--	0	0	0	0	0	0	0	0	0	0	0	0	0	0	0	0	0	0	0	0	0	0	0	0	0	0	0	0	0	0	0	0	0	0	0	0	--	--	--	--	--	--	--	--	--	--	--
HORVU.MOREX.r3.1HG0001670	HORVU.MOREX.r3.1HG0001670	--	0.410438	12	0.384759	11	0.377627	11	0	0	0	0	0	0	0	0	0	0	0.033026	2	0	0	0	0	0.014115	1	0.011836	1	0	0	0.03898	1	0	0	0	0	0	0	--	--	--	--	--	--	--	--	--	--	--
HORVU.MOREX.r3.1HG0001680	HORVU.MOREX.r3.1HG0001680	--	0	0	0	0	0	0	0	0	0	0	0	0	0	0	0	0	0	0	0	0	0	0	0	0	0	0	0	0	0	0	0	0	0	0	0	0	--	--	--	--	--	--	--	--	--	--	--
HORVU.MOREX.r3.1HG0001690	HORVU.MOREX.r3.1HG0001690	--	0.356942	26	0.618961	44	0.094764	7	0.455701	31	0.178838	12	0.109164	8	0.68405	55	0.175641	12	0.75384	60	0	0	0.103587	8	0.082697	6	0.072565	6	0.050904	4	0.050963	4	0.013899	1	0.022011	2	0	0	--	--	--	0.387604	-0.491708	normal	--	--	--	--	--
HORVU.MOREX.r3.1HG0001700	HORVU.MOREX.r3.1HG0001700	--	0.436794	34	0.279377	22	0.071408	6	0	0	0	0	0	0	0.026945	3	0	0	0.015613	2	0	0	0	0	0	0	0	0	0	0	0	0	0	0	0	0	0	0	--	--	--	--	--	--	--	--	--	--	--
HORVU.MOREX.r3.1HG0001710	HORVU.MOREX.r3.1HG0001710	--	0.382266	3	0	0	0	0	0	0	0	0	0	0	0.126876	2	0	0	0.103263	1	0	0	0	0	0	0	0	0	0	0	0	0	0	0	0	0	0	0	--	--	--	--	--	--	--	--	--	--	--
HORVU.MOREX.r3.1HG0001720	HORVU.MOREX.r3.1HG0001720	--	0.094618	7	0.08072	6	0.044891	4	0.39922	27	0.3525	24	0.164621	12	0.027764	3	0.275478	19	0.149355	12	0	0	0.041891	3	0.069163	5	0.07625	6	0.013268	1	0.036074	3	0.013899	1	0.010189	1	0	0	--	--	--	--	--	--	--	--	--	--	--
HORVU.MOREX.r3.1HG0001730	HORVU.MOREX.r3.1HG0001730	--	0	0	0.016495	2	0.03337	3	0	0	0	0	0	0	0	0	0	0	0.039033	4	0	0	0	0	0	0	0	0	0	0	0	0	0	0	0	0	0	0	--	--	--	--	--	--	--	--	--	--	--
HORVU.MOREX.r3.1HG0001750	HORVU.MOREX.r3.1HG0001750	--	0	0	0	0	0	0	0	0	0	0	0	0	0	0	0	0	0	0	0	0	0	0	0	0	0	0	0.173355	8	0	0	0.13514	6	0.26985	12	0.205264	9	--	--	--	--	--	--	--	--	--	--	--
HORVU.MOREX.r3.1HG0001760	HORVU.MOREX.r3.1HG0001760	--	0	0	0	0	0	0	0	0	0	0	0	0	0	0	0	0	0	0	0	0	0	0	0	0	0	0	0	0	0	0	0	0	0	0	0	0	--	--	--	--	--	--	--	--	--	--	--
HORVU.MOREX.r3.1HG0001770	HORVU.MOREX.r3.1HG0001770	--	0	0	0	0	0	0	0	0	0	0	0	0	0	0	0	0	0	0	0	0	0	0	0	0	0	0	0	0	0	0	0	0	0	0	0	0	--	--	--	--	--	--	--	--	--	--	--
HORVU.MOREX.r3.1HG0001780	HORVU.MOREX.r3.1HG0001780	--	0	0	0	0	0	0	0	0	0	0	0	0	0	0	0	0	0	0	0	0	0	0	0	0	0	0	0	0	0	0	0	0	0	0	0	0	--	--	--	--	--	--	--	--	--	--	--
HORVU.MOREX.r3.1HG0001790	HORVU.MOREX.r3.1HG0001790	--	0	0	0	0	0	0	0	0	0	0	0	0	0	0	0	0	0	0	0	0	0	0	0	0	0	0	0	0	0	0	0	0	0	0	0	0	--	--	--	--	--	--	--	--	--	--	--
HORVU.MOREX.r3.1HG0001800	HORVU.MOREX.r3.1HG0001800	--	1.17383	84	0.671848	47	0.882163	63	0.925146	62	0.904308	61	0.630478	46	0.831001	67	1.73615	116	0.984059	78	0.139037	10	0.1362	10	0.233131	16	0.221449	17	0	0	0.061286	4	0.068048	5	0.029855	2	0.048311	4	0.910221	0.0488599	normal	0.304428	-0.382853	normal	2.57859e-09	-1.99806	down	1.10908e-06	2.21588
HORVU.MOREX.r3.1HG0001810	HORVU.MOREX.r3.1HG0001810	--	0	0	0	0	0	0	0	0	0.118173	6	0	0	0	0	0	0	0	0	0	0	0	0	0	0	0	0	0	0	0	0	0	0	0	0	0	0	--	--	--	--	--	--	--	--	--	--	--
HORVU.MOREX.r3.1HG0001820	HORVU.MOREX.r3.1HG0001820	--	0.391125	11	0.163109	5	0.040424	2	0	0	0	0	0	0	0	0	0.156298	5	0	0	0.019458	1	0	0	0.014115	1	0.011836	1	0	0	0.038094	1	0	0	0	0	0	0	--	--	--	--	--	--	--	--	--	--	--
HORVU.MOREX.r3.1HG0001830	HORVU.MOREX.r3.1HG0001830	--	0	0	0	0	0	0	0	0	0	0	0	0	0	0	0	0	0	0	0	0	0	0	0	0	0	0	0	0	0	0	0	0	0	0	0	0	--	--	--	--	--	--	--	--	--	--	--
HORVU.MOREX.r3.1HG0001840	HORVU.MOREX.r3.1HG0001840	--	0.139088	10	0.175608	13	0.158162	12	0.195498	13	0.165158	12	0.108	8	0.364818	30	0.22236	15	0.14017	12	0	0	0	0	0.014179	1	0.048431	4	0.016287	2	0.030137	2	0.005481	1	0	0	0	0	--	--	--	--	--	--	--	--	--	--	--
HORVU.MOREX.r3.1HG0001850	HORVU.MOREX.r3.1HG0001850	--	0.058946	5	0.08948	7	0.05076	4	0	0	0	0	0	0	0.015388	2	0	0	0.015613	2	0	0	0	0	0	0	0	0	0	0	0	0	0	0	0	0	0	0	--	--	--	--	--	--	--	--	--	--	--
HORVU.MOREX.r3.1HG0001860	HORVU.MOREX.r3.1HG0001860	--	0.022936	1	0	0	0	0	0	0	0	0	0	0	0.126896	2	0	0	0.145647	2	0	0	0	0	0	0	0	0	0	0	0	0	0	0	0	0	0	0	--	--	--	--	--	--	--	--	--	--	--
HORVU.MOREX.r3.1HG0001870	HORVU.MOREX.r3.1HG0001870	--	0	0	0	0	0	0	0	0	0	0	0	0	0	0	0	0	0	0	0	0	0	0	0	0	0	0	0	0	0	0	0	0	0	0	0	0	--	--	--	--	--	--	--	--	--	--	--
HORVU.MOREX.r3.1HG0001880	HORVU.MOREX.r3.1HG0001880	--	0.250008	18	0.391656	28	0.285244	21	0.390475	26	0.340364	23	0.248264	18	0.15658	13	0.337698	23	0.353152	28	0.063898	5	0.035497	3	0.031042	3	0.06462	5	0.044816	3	0.080731	6	0.005481	1	0.023844	2	0	0	--	--	--	--	--	--	--	--	--	--	--
HORVU.MOREX.r3.1HG0001890	HORVU.MOREX.r3.1HG0001890	--	0.0074	1	0.040637	4	0.023107	2	0	0	0	0	0	0	0	0	0	0	0	0	0	0	0	0	0	0	0	0	0	0	0	0	0	0	0	0	0	0	--	--	--	--	--	--	--	--	--	--	--
HORVU.MOREX.r3.1HG0001910	HORVU.MOREX.r3.1HG0001910	--	0	0	0	0	0	0	0	0	0	0	0	0	0	0	0	0	0.021963	2	0	0	0	0	0	0	0	0	0.013185	2	0	0	0	0	0	0	0	0	--	--	--	--	--	--	--	--	--	--	--
HORVU.MOREX.r3.1HG0001920	HORVU.MOREX.r3.1HG0001920	--	0	0	0	0	0	0	0	0	0	0	0	0	0	0	0	0	0	0	0	0	0	0	0	0	0	0	0	0	0	0	0	0	0	0	0	0	--	--	--	--	--	--	--	--	--	--	--
HORVU.MOREX.r3.1HG0001930	HORVU.MOREX.r3.1HG0001930	--	0	0	0	0	0	0	0	0	0	0	0	0	0	0	0	0	0	0	0	0	0	0	0	0	0	0	0	0	0	0	0	0	0	0	0	0	--	--	--	--	--	--	--	--	--	--	--
HORVU.MOREX.r3.1HG0001940	HORVU.MOREX.r3.1HG0001940	--	0	0	0	0	0	0	0	0	0	0	0	0	0	0	0	0	0	0	0	0	0	0	0	0	0	0	0	0	0	0	0	0	0	0	0	0	--	--	--	--	--	--	--	--	--	--	--
HORVU.MOREX.r3.1HG0001950	HORVU.MOREX.r3.1HG0001950	--	0	0	0	0	0	0	0	0	0	0	0	0	0	0	0	0	0	0	0	0	0	0	0	0	0	0	0	0	0	0	0	0	0	0	0	0	--	--	--	--	--	--	--	--	--	--	--
HORVU.MOREX.r3.1HG0001960	HORVU.MOREX.r3.1HG0001960	--	0	0	0	0	0	0	0	0	0	0	0	0	0	0	0	0	0	0	0	0	0	0	0	0	0	0	0	0	0	0	0	0	0	0	0	0	--	--	--	--	--	--	--	--	--	--	--
HORVU.MOREX.r3.1HG0001970	HORVU.MOREX.r3.1HG0001970	LOC109780915	0	0	0	0	0	0	0	0	0	0	0	0	0	0	0	0	0	0	0	0	0	0	0	0	0	0	0	0	0	0	0	0	0	0	0	0	--	--	--	--	--	--	--	--	--	--	--
HORVU.MOREX.r3.1HG0001980	HORVU.MOREX.r3.1HG0001980	--	0	0	0	0	0	0	0	0	0	0	0	0	0	0	0	0	0	0	0	0	0	0	0	0	0	0	0	0	0	0	0	0	0	0	0	0	--	--	--	--	--	--	--	--	--	--	--
HORVU.MOREX.r3.1HG0001990	HORVU.MOREX.r3.1HG0001990	--	0	0	0	0	0	0	0	0	0	0	0	0	0	0	0	0	0	0	0	0	0	0	0.06099	2	0	0	0	0	0	0	0	0	0	0	0	0	--	--	--	--	--	--	--	--	--	--	--
HORVU.MOREX.r3.1HG0002000	HORVU.MOREX.r3.1HG0002000	--	0	0	0	0	0	0	0	0	0	0	0.220221	4	0	0	0	0	0	0	0	0	0	0	0	0	0	0	0	0	0	0	0	0	0	0	0	0	--	--	--	--	--	--	--	--	--	--	--
HORVU.MOREX.r3.1HG0002010	HORVU.MOREX.r3.1HG0002010	--	0.053431	1	0.175694	2	0.099428	1	0.348978	3	0.247508	2	0.056553	1	0	0	0.051798	1	0	0	0.109162	1	0.050389	1	0.203256	2	0.107196	1	0	0	0	0	0.42188	4	0.078831	1	0	0	--	--	--	--	--	--	--	--	--	--	--
HORVU.MOREX.r3.1HG0002020	HORVU.MOREX.r3.1HG0002020	--	20.9568	955	24.7367	1100	22.8051	1041	36.8417	1563	35.8612	1534	36.3101	1666	17.8053	906	18.5176	786	17.2707	868	50.5504	2155	45.6918	1994	48.8947	2069	24.1036	1126	24.4281	1036	23.0193	958	33.0591	1446	31.5285	1343	27.1145	1138	1.04097e-22	0.859734	normal	0.0012378	0.316676	normal	3.06981e-80	1.42295	up	0.00186649	-0.249707
HORVU.MOREX.r3.1HG0002030	HORVU.MOREX.r3.1HG0002030	--	0.165835	5	0	0	0.12353	4	0	0	0	0	0	0	0	0	0	0	0	0	0	0	0	0	0	0	0	0	0	0	0	0	0	0	0	0	0	0	--	--	--	--	--	--	--	--	--	--	--
HORVU.MOREX.r3.1HG0002040	HORVU.MOREX.r3.1HG0002040	--	1.32836	35	2.03097	52	1.11659	30	2.1694	53	2.23523	55	2.55348	68	3.54539	104	4.50642	110	2.99813	87	3.33908	82	3.76464	95	3.43092	84	3.65524	98	2.52888	62	2.49642	60	5.02981	127	4.47865	110	3.86373	93	0.0412587	0.751996	normal	0.000160816	-1.23044	down	0.881328	-0.0541996	normal	0.189471	-0.425035
HORVU.MOREX.r3.1HG0002050	HORVU.MOREX.r3.1HG0002050	LOC109777806	0	0	0.226336	4	0.057114	1	0.187785	3	0	0	0	0	0	0	0.07364	1	0	0	0	0	0	0	0	0	0	0	0.003932	1	0	0	0.071464	1	0	0	0.149042	3	--	--	--	--	--	--	--	--	--	--	--
HORVU.MOREX.r3.1HG0002060	HORVU.MOREX.r3.1HG0002060	--	1.97832	98	1.8625	90	1.85614	92	2.08529	96	1.5866	74	2.12689	106	2.1062	116	2.30198	106	2.33395	127	2.60292	120	2.23245	105	2.5685	118	2.19692	111	0	0	1.7871	81	2.39934	114	2.38528	110	2.25202	102	0.485087	0.209656	normal	0.334148	-0.262592	normal	0.685717	0.121132	normal	0.553653	-0.178675
HORVU.MOREX.r3.1HG0002070	HORVU.MOREX.r3.1HG0002070	--	0.07433	2	0.135037	2	0	0	0.230062	3	0.14127	2	0	0	0	0	0.140408	2	0.084061	2	0.158906	2	0.287151	4	0	0	0.270722	4	0.079343	1	0.174181	3	0	0	0	0	0.205057	3	--	--	--	--	--	--	--	--	--	--	--
HORVU.MOREX.r3.1HG0002080	HORVU.MOREX.r3.1HG0002080	--	5.02717	535	5.20239	541	5.82687	621	1.68917	168	1.62511	163	1.4581	157	10.5281	1251	10.9292	1084	11.8009	1384	5.15165	513	4.90016	500	5.35124	529	5.80688	634	5.72965	568	6.15137	598	4.99635	511	4.33901	432	4.13059	405	2.14534e-24	-1.52668	down	3.09043e-27	-1.07747	down	8.35773e-31	-1.09227	down	2.86097e-23	-1.51192
HORVU.MOREX.r3.1HG0002090	HORVU.MOREX.r3.1HG0002090	--	0.117576	1	0	0	0.124197	1	0	0	0	0	0	0	0	0	0	0	0	0	0	0	0	0	0	0	0	0	0	0	0	0	0	0	0	0	0.029357	1	--	--	--	--	--	--	--	--	--	--	--
HORVU.MOREX.r3.1HG0002100	HORVU.MOREX.r3.1HG0002100	--	0.019746	2	0.034877	4	0	0	0.176124	15	0.158319	14	0.111875	10	0.114488	12	0.273638	23	0.179673	18	0.042213	4	0.280733	24	0.253714	21	0.518932	47	0.647544	54	0.732121	59	0.31937	28	0.643383	53	0.831468	68	--	--	--	--	--	--	--	--	--	--	--
HORVU.MOREX.r3.1HG0002110	HORVU.MOREX.r3.1HG0002110	--	0	0	0	0	0	0	0	0	0	0	0	0	0	0	0	0	0	0	0	0	0	0	0.121496	3	0	0	0	0	0	0	0	0	0	0	0	0	--	--	--	--	--	--	--	--	--	--	--
HORVU.MOREX.r3.1HG0002130	HORVU.MOREX.r3.1HG0002130	--	14.9448	947	17.093	1051	14.6107	924	17.3099	1024	17.073	1019	17.6645	1118	16.01	1123	15.4819	908	14.6637	1025	17.3558	1026	15.2812	938	15.7348	912	20.2644	1303	19.4481	1139	18.9258	1081	21.1644	1281	20.2091	1182	22.6576	1317	0.000334887	0.353727	normal	0.876173	-0.0180426	normal	0.552478	0.070838	normal	0.00644857	0.269737
HORVU.MOREX.r3.1HG0002140	HORVU.MOREX.r3.1HG0002140	--	0	0	0	0	0	0	0	0	0	0	0	0	0	0	0	0	0	0	0	0	0	0	0.089854	2	0	0	0	0	0	0	0	0	0	0	0	0	--	--	--	--	--	--	--	--	--	--	--
HORVU.MOREX.r3.1HG0002150	HORVU.MOREX.r3.1HG0002150	--	0	0	0	0	0	0	0	0	0	0	0	0	0	0	0	0	0	0	0	0	0	0	0	0	0	0	0	0	0	0	0	0	0	0	0	0	--	--	--	--	--	--	--	--	--	--	--
HORVU.MOREX.r3.1HG0002160	HORVU.MOREX.r3.1HG0002160	--	14.9024	1011	17.0053	1132	14.6994	995	15.8097	1001	14.0099	897	14.9419	1024	14.8629	1132	17.7842	1135	17.3488	1309	27.7944	1769	26.2159	1705	26.1998	1654	17.6557	1236	17.3589	1097	20.4413	1274	17.4755	1132	20.0229	1257	14.6118	921	0.213354	0.139357	normal	0.179124	-0.146515	normal	3.51074e-15	0.665386	normal	1.51179e-14	-0.674847
HORVU.MOREX.r3.1HG0002170	HORVU.MOREX.r3.1HG0002170	--	8.17238	169	6.3329	128	6.07771	126	4.85971	94	4.42596	86	6.51176	136	6.20328	143	4.83554	93	5.83289	133	8.09869	157	5.23857	104	6.21392	120	7.01532	149	6.74778	130	6.11649	116	7.67127	152	7.25106	140	7.28194	139	0.542619	-0.176143	normal	0.356732	0.242125	normal	0.510149	0.195462	normal	0.652301	-0.142078
HORVU.MOREX.r3.1HG0002180	HORVU.MOREX.r3.1HG0002180	--	6.08734	491	5.64256	444	4.80989	389	3.6382	274	4.0576	308	4.73829	385	5.18961	468	4.35693	328	4.72982	421	5.18379	391	4.6348	358	5.08489	381	4.15773	344	5.35388	402	4.84454	357	6.02606	467	6.57806	496	6.00538	446	0.214254	-0.211386	normal	0.275105	0.171067	normal	0.764876	0.0565861	normal	0.595425	-0.0954566
HORVU.MOREX.r3.1HG0002190	HORVU.MOREX.r3.1HG0002190	--	5.22377	47	6.1761	54	2.676	24	1.97237	17	3.00794	26	1.13394	11	4.41614	44	2.33489	20	2.63551	26	4.08409	34	1.96736	17	3.06892	26	4.75403	44	2.41367	20	1.20812	10	4.65536	40	4.90019	41	2.87035	24	--	--	--	0.326145	0.463759	normal	--	--	--	--	--
HORVU.MOREX.r3.1HG0002200	HORVU.MOREX.r3.1HG0002200	--	0	0	1.46079	33	1.27885	30	1.60524	35	0	0	1.53466	36	0.241516	7	1.12638	25	2.33143	60	0.501317	11	1.94453	43	2.22722	48	0.318169	8	0.516662	12	1.86062	40	0.600975	14	0.58006	13	0.662441	15	--	--	--	--	--	--	0.748444	0.170805	normal	0.838474	-0.227706
HORVU.MOREX.r3.1HG0002210	HORVU.MOREX.r3.1HG0002210	--	0	0	0.680771	6	1.56028	14	1.27294	11	0	0	1.19067	11	0.022916	1	0.796289	7	2.02263	20	0	0	1.17009	10	2.17531	18	0	0	0.12133	1	1.0612	9	0	0	0	0	0	0	--	--	--	--	--	--	--	--	--	--	--
HORVU.MOREX.r3.1HG0002220	HORVU.MOREX.r3.1HG0002220	--	0.189682	2	0.00463	1	0	0	0.612611	6	0.328253	3	0.215392	2	0.260169	3	0.229435	2	0.107206	2	0.032183	1	0.557209	5	1.01409	9	0.12557	2	0	0	0.253039	3	0.112111	1	0.272188	3	0.053959	1	--	--	--	--	--	--	--	--	--	--	--
HORVU.MOREX.r3.1HG0002230	HORVU.MOREX.r3.1HG0002230	--	0	0	0	0	0	0	0	0	0	0	0	0	0	0	0	0	0	0	0	0	0	0	0	0	0	0	0	0	0	0	0	0	0	0	0	0	--	--	--	--	--	--	--	--	--	--	--
HORVU.MOREX.r3.1HG0002260	HORVU.MOREX.r3.1HG0002260	--	0	0	0	0	0	0	0	0	0	0	0	0	0	0	0	0	0	0	0	0	0	0	0	0	0	0	0	0	0	0	0	0	0	0	0	0	--	--	--	--	--	--	--	--	--	--	--
HORVU.MOREX.r3.1HG0002280	HORVU.MOREX.r3.1HG0002280	--	0.845462	46	0.43747	23	0.9296	50	0.726336	37	0.436395	22	0.310625	17	1.88795	114	0.989083	50	1.02421	61	0.068568	4	0.304506	16	0.369377	19	0.072525	4	0	0	0	0	0	0	0	0	0	0	0.516782	-0.328299	normal	0.053053	-0.765238	normal	7.50151e-06	-1.61423	down	--	--
HORVU.MOREX.r3.1HG0002320	HORVU.MOREX.r3.1HG0002320	--	35.995	1320	32.4442	1162	31.6524	1162	33.3672	1140	33.9394	1169	29.4926	1089	22.6821	929	24.1461	825	19.0139	769	24.9472	856	25.3925	892	20.6622	704	21.5078	809	20.7443	708	15.8695	532	22.5686	795	22.2599	763	22.4832	759	0.182365	0.144768	normal	4.68638e-08	0.566037	normal	0.462208	0.108135	normal	7.06902e-08	0.607576
HORVU.MOREX.r3.1HG0002330	HORVU.MOREX.r3.1HG0002330	--	66.1166	2825	73.6386	3071	68.0006	2908	146.914	5844	135.727	5444	144.704	6223	79.4185	3789	82.9795	3303	76.5228	3604	84.6881	3385	83.1717	3403	79.0219	3135	79.3416	3474	83.3438	3313	78.127	3048	73.4235	3012	78.8747	3150	75.878	2985	1.07864e-79	1.23091	up	0.00014806	-0.236585	normal	0.52596	0.0475173	normal	5.27885e-52	0.952893
HORVU.MOREX.r3.1HG0002340	HORVU.MOREX.r3.1HG0002340	--	29.297	1751	25.2333	1472	28.0108	1676	22.741	1266	21.9951	1235	23.8136	1433	23.8706	1593	22.98	1280	23.5466	1552	23.9453	1339	24.3628	1395	25.1494	1396	25.9418	1589	22.4257	1248	25.8745	1412	30.8796	1772	28.9769	1619	26.761	1473	0.480985	-0.0735803	normal	0.0235515	0.19321	normal	0.525427	0.0601843	normal	0.513537	0.0629545
HORVU.MOREX.r3.1HG0002350	HORVU.MOREX.r3.1HG0002350	--	4.00603	50	2.85028	35	2.59588	33	1.5496	18	2.37301	28	1.84179	24	1.57726	22	2.26251	27	1.57261	22	2.48352	29	2.15626	26	3.05486	36	1.94888	25	2.29294	27	1.85605	22	1.06295	13	2.0673	25	1.63673	19	--	--	--	--	--	--	--	--	--	--	--
HORVU.MOREX.r3.1HG0002360	HORVU.MOREX.r3.1HG0002360	--	2.08716	104	1.56551	76	1.96554	98	0.645498	30	0.740543	35	0.813745	41	0.036222	2	0.043416	2	0.156692	9	0.599016	28	0.614391	30	0.806084	38	0	0	0	0	0	0	0	0	0	0	0	0	0.000970102	-1.06544	down	3.82179e-18	3.7216	up	--	--	--	0.601089	0.257341
HORVU.MOREX.r3.1HG0002370	HORVU.MOREX.r3.1HG0002370	--	0.024936	1	0.022926	1	0.051096	1	0	0	0	0	0.024814	1	0	0	0	0	0	0	0	0	0	0	0	0	0	0	0	0	0	0	0	0	0	0	0.103475	1	--	--	--	--	--	--	--	--	--	--	--
HORVU.MOREX.r3.1HG0002380	HORVU.MOREX.r3.1HG0002380	--	0	0	0	0	0	0	0	0	0	0	0	0	0	0	0	0	0	0	0	0	0	0	0	0	0.151335	8	0	0	0.126973	6	0.040393	2	0	0	0	0	--	--	--	--	--	--	--	--	--	--	--
HORVU.MOREX.r3.1HG0002390	HORVU.MOREX.r3.1HG0002390	--	0	0	0	0	0	0	0	0	0	0	0	0	0	0	0	0	0	0	0	0	0	0	0	0	0	0	0	0	0	0	0	0	0	0	0	0	--	--	--	--	--	--	--	--	--	--	--
HORVU.MOREX.r3.1HG0002400	HORVU.MOREX.r3.1HG0002400	--	0	0	0	0	0	0	0	0	0	0	0	0	0	0	0	0	0	0	0	0	0	0	0	0	0	0	0	0	0	0	0	0	0	0	0	0	--	--	--	--	--	--	--	--	--	--	--
HORVU.MOREX.r3.1HG0002410	HORVU.MOREX.r3.1HG0002410	--	0.092357	9	0	0	0	0	0.17472	16	0.150198	14	0.082754	8	0.047458	5	0.135421	12	0.169176	18	0.04359	4	0.10014	9	0	0	0	0	0	0	0	0	0	0	0.022802	2	0.069446	7	--	--	--	--	--	--	--	--	--	--	--
HORVU.MOREX.r3.1HG0002430	HORVU.MOREX.r3.1HG0002430	--	0	0	0	0	0	0	0	0	0	0	0	0	0	0	0	0	0	0	0	0	0	0	0	0	0	0	0	0	0	0	0	0	0	0	0	0	--	--	--	--	--	--	--	--	--	--	--
HORVU.MOREX.r3.1HG0002440	HORVU.MOREX.r3.1HG0002440	--	0	0	0	0	0	0	0	0	0	0	0	0	0.204502	10	0	0	0	0	0	0	0.047882	2	0.098776	5	0	0	0.045338	2	0.122863	5	0	0	0.097962	4	0	0	--	--	--	--	--	--	--	--	--	--	--
HORVU.MOREX.r3.1HG0002450	HORVU.MOREX.r3.1HG0002450	LOC109757809	29.0511	2351	30.1085	2378	29.2754	2372	19.9414	1503	22.252	1691	21.0572	1716	80.4586	7270	81.8537	6171	81.9771	7312	164.671	12465	152.791	11840	155.077	11651	186.025	15428	189.813	14292	196.731	14526	138.84	10786	142.144	10750	135.738	10112	0.000200788	-0.288176	normal	3.74149e-212	-1.49887	down	3.75561e-106	0.948469	normal	0	-2.7348
HORVU.MOREX.r3.1HG0002460	HORVU.MOREX.r3.1HG0002460	--	0	0	0	0	0.27641	4	0	0	0	0	0	0	0.089097	2	0	0	0	0	0	0	0	0	0	0	0.126937	2	0.18411	2	0	0	0	0	0	0	0.427795	5	--	--	--	--	--	--	--	--	--	--	--
HORVU.MOREX.r3.1HG0002470	HORVU.MOREX.r3.1HG0002470	--	35.0101	899	32.4873	815	32.4013	833	25.3746	607	30.2097	729	21.8193	564	59.4714	1706	61.6471	1475	45.0661	1276	111.36	2675	100.505	2472	93.088	2220	111.193	2927	109.224	2610	99.153	2325	92.5935	2283	88.5481	2125	97.5352	2306	0.220085	-0.172465	normal	3.84707e-12	-0.761956	normal	3.63315e-18	0.861771	normal	2.08939e-58	-1.80765
HORVU.MOREX.r3.1HG0002480	HORVU.MOREX.r3.1HG0002480	--	0	0	0	0	0	0	0	0	0	0	0	0	0	0	0	0	0	0	0	0	0	0	0	0	0	0	0	0	0	0	0	0	0	0	0	0	--	--	--	--	--	--	--	--	--	--	--
HORVU.MOREX.r3.1HG0002490	HORVU.MOREX.r3.1HG0002490	--	0	0	0	0	0	0	0	0	0	0	0	0	0	0	0	0	0	0	0	0	0	0	0	0	0	0	0	0	0	0	0	0	0	0	0	0	--	--	--	--	--	--	--	--	--	--	--
HORVU.MOREX.r3.1HG0002500	HORVU.MOREX.r3.1HG0002500	--	0	0	0.068956	4	0.123795	8	0.188462	11	0	0	0.101649	7	0.183056	12	0.103848	6	0.174516	12	0.008021	1	0.122274	7	0	0	0.213634	13	0.303131	17	0.208789	12	0.186754	11	0.231725	13	0.16671	10	--	--	--	--	--	--	--	--	--	--	--
HORVU.MOREX.r3.1HG0002510	HORVU.MOREX.r3.1HG0002510	--	35.5645	4786	35.9204	4701	36.0212	4860	22.0639	2755	20.5083	2601	22.3802	3016	81.8514	12243	78.2976	9819	81.4418	12087	68.8749	8661	70.7327	9076	71.3347	8927	74.6109	10241	73.9035	9211	74.1628	9068	52.5942	6755	52.8105	6593	49.4118	6095	4.14948e-17	-0.533015	normal	1.35887e-174	-1.20132	down	1.53148e-06	-0.195688	normal	5.67157e-156	-1.53573
HORVU.MOREX.r3.1HG0002520	HORVU.MOREX.r3.1HG0002520	--	0	0	0.245649	6	0.386092	10	0	0	0	0	0	0	0	0	0	0	0.03746	1	0	0	0	0	0	0	0	0	0	0	0	0	0	0	0	0	0	0	--	--	--	--	--	--	--	--	--	--	--
HORVU.MOREX.r3.1HG0002530	HORVU.MOREX.r3.1HG0002530	--	180.04	3210	169.366	2947	160.14	2858	118.038	1960	104.46	1749	92.8719	1667	0	0	0	0	0	0	5.2501	88	6.19618	106	3.92937	66	0	0	0	0	0	0	0.175289	3	0.31889	6	0.243716	5	1.32028e-07	-0.494502	normal	7.08113e-135	9.77052	up	3.09207e-27	3.83058	up	5.16345e-207	4.48038
HORVU.MOREX.r3.1HG0002560	HORVU.MOREX.r3.1HG0002560	--	8.02197	347	8.00234	338	8.31654	360	9.06282	365	7.30407	297	7.87137	343	9.37075	453	9.60016	387	7.74417	370	7.46945	303	8.22789	341	7.29403	293	6.62425	294	7.7646	313	7.34088	290	10.3921	432	9.47472	383	9.84045	392	0.264243	0.1857	normal	0.294506	-0.167245	normal	0.223274	-0.207404	normal	0.169315	0.236474
HORVU.MOREX.r3.1HG0002570	HORVU.MOREX.r3.1HG0002570	--	0	0	0	0	0	0	0	0	0	0	0	0	0	0	0	0	0	0	0	0	0	0	0	0	0	0	0	0	0	0	0	0	0	0	0	0	--	--	--	--	--	--	--	--	--	--	--
HORVU.MOREX.r3.1HG0002580	HORVU.MOREX.r3.1HG0002580	--	0	0	0.034975	2	0	0	0	0	0	0	0	0	0	0	0	0	0	0	0	0	0	0	0	0	0	0	0	0	0	0	0	0	0	0	0	0	--	--	--	--	--	--	--	--	--	--	--
HORVU.MOREX.r3.1HG0002590	HORVU.MOREX.r3.1HG0002590	--	13.1967	686	17.33	868	14.3397	731	14.4298	686	11.0486	528	15.0495	778	15.2374	875	13.0562	620	12.1994	700	13.1784	643	11.1805	558	13.4327	647	13.5937	738	13.5861	659	11.8331	571	14.2172	713	13.3181	647	14.9593	715	0.815052	0.0405949	normal	0.443461	0.107652	normal	0.601801	-0.0821304	normal	0.112052	0.236728
HORVU.MOREX.r3.1HG0002600	HORVU.MOREX.r3.1HG0002600	--	0	0	0	0	0	0	0	0	0	0	0	0	0	0	0	0	0	0	0	0	0	0	0	0	0	0	0	0	0	0	0	0	0	0	0	0	--	--	--	--	--	--	--	--	--	--	--
HORVU.MOREX.r3.1HG0002630	HORVU.MOREX.r3.1HG0002630	--	7.79908	806	7.27855	734	7.50314	776	3.87988	373	3.36241	326	3.70194	385	2.4923	288	3.22899	311	3.08255	351	2.49302	241	2.43197	241	2.86724	275	3.61192	383	3.47965	335	2.97441	281	4.12428	409	3.66823	354	4.05187	386	2.21764e-12	-0.843026	normal	1.39447e-25	1.31002	up	0.407679	-0.167612	normal	5.24866e-05	0.647167
HORVU.MOREX.r3.1HG0002640	HORVU.MOREX.r3.1HG0002640	--	0.042373	3	0	0	0.021163	2	0	0	0	0	0	0	0.066274	4	0	0	0.337497	18	0.090286	4	0.040261	2	0	0	0.0175	1	0	0	0.046245	2	0	0	0	0	0	0	--	--	--	--	--	--	--	--	--	--	--
HORVU.MOREX.r3.1HG0002650	HORVU.MOREX.r3.1HG0002650	--	0	0	0	0	0	0	0	0	0	0	0	0	0	0	0	0	0	0	0	0	0	0	0	0	0	0	0	0	0	0	0	0	0	0	0	0	--	--	--	--	--	--	--	--	--	--	--
HORVU.MOREX.r3.1HG0002660	HORVU.MOREX.r3.1HG0002660	--	16.025	1990	13.937	1689	15.8224	1967	18.0107	2082	14.3902	1678	18.5035	2313	12.3404	1711	11.7866	1364	11.4927	1573	12.8191	1489	13.8146	1643	13.7826	1589	11.7814	1500	12.5816	1454	11.9836	1359	12.7084	1515	13.6133	1580	10.8871	1245	0.00106812	0.343921	normal	6.05542e-05	0.325833	normal	0.0235356	0.180137	normal	5.35272e-07	0.49394
HORVU.MOREX.r3.1HG0002670	HORVU.MOREX.r3.1HG0002670	--	0.078414	4	0	0	0.115925	6	0.530795	26	0.247736	12	0.271849	14	0.244702	14	0.273522	13	0.141793	8	0	0	0.052399	3	0.292752	14	0.34093	18	0.189315	9	0.256164	12	0.049549	3	0.851921	41	0.652094	31	--	--	--	--	--	--	--	--	--	--	--
HORVU.MOREX.r3.1HG0002680	HORVU.MOREX.r3.1HG0002680	--	0	0	0	0	0	0	0	0	0	0	0	0	0	0	0	0	0	0	0	0	0	0	0	0	0	0	0	0	0	0	0	0	0	0	0	0	--	--	--	--	--	--	--	--	--	--	--
HORVU.MOREX.r3.1HG0002690	HORVU.MOREX.r3.1HG0002690	--	0	0	0	0	0	0	0.256139	10	0	0	0	0	0	0	0	0	0	0	0	0	0	0	0	0	0	0	0	0	0	0	0	0	0	0	0	0	--	--	--	--	--	--	--	--	--	--	--
HORVU.MOREX.r3.1HG0002730	HORVU.MOREX.r3.1HG0002730	--	0	0	0	0	0	0	0	0	0	0	0	0	0	0	0	0	0	0	0	0	0	0	0	0	0	0	0	0	0	0	0	0	0	0	0	0	--	--	--	--	--	--	--	--	--	--	--
HORVU.MOREX.r3.1HG0002740	HORVU.MOREX.r3.1HG0002740	--	0	0	0	0	0	0	0	0	0	0	0	0	0	0	0	0	0	0	0	0	0	0	0	0	0	0	0	0	0	0	0	0	0	0	0	0	--	--	--	--	--	--	--	--	--	--	--
HORVU.MOREX.r3.1HG0002750	HORVU.MOREX.r3.1HG0002750	--	0	0	0	0	0.274073	6	0	0	0	0	0	0	0	0	0	0	0	0	0	0	0	0	0	0	0	0	0	0	0	0	0	0	0	0	0	0	--	--	--	--	--	--	--	--	--	--	--
HORVU.MOREX.r3.1HG0002760	HORVU.MOREX.r3.1HG0002760	--	0.028383	4	0	0	0.044923	7	0.159236	20	0.078021	10	0	0	0.350894	53	0.20895	26	0.181593	27	0.254891	32	0.480194	62	0.187437	24	37.4387	5120	32.2731	4007	42.0852	5128	59.4962	7621	72.4395	9034	65.4571	8041	--	--	--	--	--	--	--	--	--	--	--
HORVU.MOREX.r3.1HG0002770	HORVU.MOREX.r3.1HG0002770	--	54.971	524	55.8771	520	87.735	837	27.6839	246	20.7925	187	18.2684	176	10.4001	111	14.9824	134	10.4291	110	66.5374	594	76.3305	697	62.8054	556	0.425192	5	0.631492	6	0.428222	4	0	0	0.348402	4	0.702859	7	1.0848e-11	-1.33732	down	3.691e-33	2.36691	up	1.27024e-53	2.40583	up	7.46163e-18	-1.44461
HORVU.MOREX.r3.1HG0002780	HORVU.MOREX.r3.1HG0002780	--	0.130189	2	0	0	0	0	0	0	0	0	0	0	0	0	0.049317	1	0	0	0	0	0	0	0.06501	1	0	0	0	0	0	0	0.140763	3	0	0	0	0	--	--	--	--	--	--	--	--	--	--	--
HORVU.MOREX.r3.1HG0002790	HORVU.MOREX.r3.1HG0002790	--	0	0	0	0	0	0	0	0	0	0	0	0	0	0	0	0	0	0	0	0	0	0	0	0	0	0	0	0	0	0	0	0	0	0	0	0	--	--	--	--	--	--	--	--	--	--	--
HORVU.MOREX.r3.1HG0002800	HORVU.MOREX.r3.1HG0002800	--	0	0	0	0	0	0	0	0	0	0	0	0	0	0	0	0	0	0	0	0	0	0	0	0	0	0	0	0	0	0	0	0	0	0	0	0	--	--	--	--	--	--	--	--	--	--	--
HORVU.MOREX.r3.1HG0002810	HORVU.MOREX.r3.1HG0002810	LOC109745986	0	0	0	0	0	0	0	0	0	0	0	0	0	0	0	0	0	0	0	0	0	0	0	0	0	0	0	0	0	0	0	0	0	0	0	0	--	--	--	--	--	--	--	--	--	--	--
HORVU.MOREX.r3.1HG0002820	HORVU.MOREX.r3.1HG0002820	--	0	0	0	0	0	0	0	0	0	0	0	0	0	0	0	0	0	0	0	0	0	0	0	0	0	0	0	0	0	0	0	0	0	0	0	0	--	--	--	--	--	--	--	--	--	--	--
HORVU.MOREX.r3.1HG0002830	HORVU.MOREX.r3.1HG0002830	--	4.05331	315	3.80993	289	3.48507	272	0	0	0	0	0	0	0	0	0	0	0	0	0	0	0	0	0	0	0	0	0	0	0	0	0	0	0	0	0	0	5.14764e-45	-6.49388	down	4.34868e-49	6.77416	up	--	--	--	--	--
HORVU.MOREX.r3.1HG0002840	HORVU.MOREX.r3.1HG0002840	--	2.02061	173	2.01615	168	2.42311	207	2.46294	196	1.91877	154	2.6461	228	4.12782	393	3.98854	317	3.93768	371	0.764004	61	0.706744	58	0.955539	76	0.393468	35	0.717983	57	0.553314	44	0.120803	10	0.151528	13	0.07987	7	0.162574	0.307795	normal	1.83327e-08	-0.916002	normal	6.23607e-32	-2.15935	down	1.46097e-11	1.66495
HORVU.MOREX.r3.1HG0002850	HORVU.MOREX.r3.1HG0002850	--	0	0	0	0	0	0	0	0	0	0	0	0	0	0	0	0	0	0	0	0	0	0	0	0	0.13528	4	0	0	0	0	0	0	0	0	0	0	--	--	--	--	--	--	--	--	--	--	--
HORVU.MOREX.r3.1HG0002860	HORVU.MOREX.r3.1HG0002860	--	0.344417	27	0.586096	45	0.366827	29	0.824379	60	0.789587	58	0.753677	59	0.99995	87	0.853938	62	1.00526	86	0.418533	31	0.560677	42	0.35602	26	0.937285	75	0.792828	57	0.96412	68	0.71972	54	0.879985	64	1.20639	86	0.0093158	0.954034	normal	0.00219134	-1.06551	down	0.00517237	-0.885784	normal	0.0160706	0.934952
HORVU.MOREX.r3.1HG0002870	HORVU.MOREX.r3.1HG0002870	--	23.5875	1362	21.5416	1215	20.9944	1214	19.5584	1052	18.6669	1013	21.792	1267	15.8643	1023	18.6434	1003	17.4055	1108	19.8643	1073	20.8666	1154	20.4411	1096	16.1299	955	19.1169	1028	15.8596	837	21.2838	1180	17.8769	965	20.5183	1091	0.640483	0.0540699	normal	0.000961876	0.313056	normal	0.0156871	0.234296	normal	0.188707	0.13526
HORVU.MOREX.r3.1HG0002880	HORVU.MOREX.r3.1HG0002880	--	154.395	6132	145.716	5771	140.464	5584	97.2006	3551	101.542	3850	86.6315	3463	152.76	6707	159.588	5884	150.436	6688	149.695	5371	146.876	5517	136.617	5062	147.894	5958	143.663	5411	139.328	5170	138.861	5347	134.843	5082	131.868	4898	8.14027e-09	-0.438338	normal	0.0761208	-0.0967926	normal	0.0278563	-0.116606	normal	4.78083e-08	-0.414555
HORVU.MOREX.r3.1HG0002890	HORVU.MOREX.r3.1HG0002890	--	13.2237	853	12.6579	797	13.0915	845	14.3223	860	13.0018	787	12.9725	842	12.9101	930	12.9155	776	12.052	857	14.7645	891	13.8165	854	13.6412	817	11.2814	746	12.2743	737	10.6559	628	14.7243	912	13.5577	817	13.2692	788	0.0260371	0.239778	normal	0.95912	0.00608772	normal	0.153225	0.155055	normal	0.425768	0.0943457
HORVU.MOREX.r3.1HG0002910	HORVU.MOREX.r3.1HG0002910	--	0.491476	36	0.669501	47	0.297194	22	0.679181	46	0.637839	43	0.243366	18	0.7306	59	0.975037	66	0.899216	72	0.224207	16	0.175977	13	0.044067	3	0.331028	25	0.230176	16	0.102589	7	0.024065	2	0.080139	6	0.082672	6	0.634929	0.244417	normal	0.0394848	-0.785533	normal	2.1399e-06	-1.69749	down	--	--
HORVU.MOREX.r3.1HG0002920	HORVU.MOREX.r3.1HG0002920	--	1.08337	54	0.669334	33	0.610129	31	0	0	0	0	0	0	0	0	0	0	0	0	0	0	0	0	0	0	0	0	0	0	0	0	0	0	0	0	0	0	--	--	--	--	--	--	--	--	--	--	--
HORVU.MOREX.r3.1HG0002930	HORVU.MOREX.r3.1HG0002930	--	0	0	0	0	0	0	0	0	0	0	0	0	0	0	0	0	0	0	0	0	0	0	0	0	0	0	0	0	0	0	0	0	0	0	0	0	--	--	--	--	--	--	--	--	--	--	--
HORVU.MOREX.r3.1HG0002940	HORVU.MOREX.r3.1HG0002940	--	0	0	0	0	0	0	0	0	0	0	0	0	0	0	0	0	0	0	0	0	0	0	0	0	0	0	0	0	0	0	0	0	0	0	0	0	--	--	--	--	--	--	--	--	--	--	--
HORVU.MOREX.r3.1HG0002950	HORVU.MOREX.r3.1HG0002950	--	0	0	0	0	0	0	0	0	0	0	0	0	0	0	0	0	0	0	0	0	0	0	0	0	0	0	0	0	0	0	0	0	0	0	0	0	--	--	--	--	--	--	--	--	--	--	--
HORVU.MOREX.r3.1HG0002960	HORVU.MOREX.r3.1HG0002960	--	0	0	0	0	0	0	0	0	0	0	0	0	0	0	0	0	0	0	0	0	0	0	0	0	0	0	0	0	0	0	0	0	0	0	0	0	--	--	--	--	--	--	--	--	--	--	--
HORVU.MOREX.r3.1HG0002980	HORVU.MOREX.r3.1HG0002980	--	0.038762	3	0.203691	15	0.472863	35	0.171333	12	0.092466	7	0.088086	7	0.063193	6	0.074245	6	0.088814	8	0.052493	4	0	0	0.01945	2	0.022001	2	0.01952	2	0.029869	2	0	0	0.047841	4	0.026417	2	--	--	--	--	--	--	--	--	--	--	--
HORVU.MOREX.r3.1HG0002990	HORVU.MOREX.r3.1HG0002990	--	0.119265	10	0.437295	33	0.607737	47	0	0	0	0	0	0	0	0	0	0	0	0	0	0	0	0	0	0	0	0	0	0	0	0	0	0	0	0	0	0	--	--	--	--	--	--	--	--	--	--	--
HORVU.MOREX.r3.1HG0003000	HORVU.MOREX.r3.1HG0003000	--	0	0	0	0	0	0	0	0	0	0	0	0	0	0	0	0	0	0	0	0	0	0	0	0	0	0	0	0	0	0	0	0	0	0	0	0	--	--	--	--	--	--	--	--	--	--	--
HORVU.MOREX.r3.1HG0003010	HORVU.MOREX.r3.1HG0003010	--	0	0	0	0	0	0	0	0	0	0	0	0	0	0	0	0	0	0	0	0	0	0	0	0	0	0	0	0	0	0	0	0	0	0	0	0	--	--	--	--	--	--	--	--	--	--	--
HORVU.MOREX.r3.1HG0003030	HORVU.MOREX.r3.1HG0003030	--	0.78082	29	0.050889	2	0.159665	6	0.190242	7	0.221152	8	0.213465	8	0.409734	17	0.201941	7	0.202451	9	0.125187	5	0	0	0.049787	2	0.017687	1	0.038444	2	0.064783	3	0	0	0.122077	5	0.058505	2	--	--	--	--	--	--	--	--	--	--	--
HORVU.MOREX.r3.1HG0003040	HORVU.MOREX.r3.1HG0003040	--	0.551169	43	0.525057	40	0.582743	46	0	0	0	0	0	0	0	0	0	0	0	0	0	0	0	0	0	0	0	0	0	0	0	0	0	0	0	0	0	0	3.8312e-12	-3.87874	down	1.19987e-13	4.12487	up	--	--	--	--	--
HORVU.MOREX.r3.1HG0003050	HORVU.MOREX.r3.1HG0003050	--	0	0	0.166142	9	0.040499	3	0	0	0	0	0	0	0	0	0	0	0	0	0	0	0	0	0	0	0	0	0	0	0	0	0	0	0	0	0	0	--	--	--	--	--	--	--	--	--	--	--
HORVU.MOREX.r3.1HG0003060	HORVU.MOREX.r3.1HG0003060	--	0	0	0	0	0	0	0	0	0	0	0	0	0	0	0	0	0	0	0	0	0	0	0	0	0	0	0	0	0	0	0	0	0	0	0	0	--	--	--	--	--	--	--	--	--	--	--
HORVU.MOREX.r3.1HG0003070	HORVU.MOREX.r3.1HG0003070	--	0.029197	2	0.165408	12	0.071356	5	0	0	0	0	0	0	0	0	0	0	0	0	0	0	0	0	0	0	0	0	0	0	0	0	0	0	0	0	0	0	--	--	--	--	--	--	--	--	--	--	--
HORVU.MOREX.r3.1HG0003080	HORVU.MOREX.r3.1HG0003080	--	0	0	0	0	0	0	0	0	0	0	0	0	0	0	0	0	0	0	0	0	0	0	0	0	0	0	0	0	0	0	0	0	0	0	0	0	--	--	--	--	--	--	--	--	--	--	--
HORVU.MOREX.r3.1HG0003090	HORVU.MOREX.r3.1HG0003090	--	0	0	0	0	0	0	0	0	0	0	0	0	0	0	0	0	0	0	0	0	0	0	0	0	0	0	0	0	0	0	0	0	0	0	0	0	--	--	--	--	--	--	--	--	--	--	--
HORVU.MOREX.r3.1HG0003100	HORVU.MOREX.r3.1HG0003100	--	0	0	0	0	0	0	0	0	0	0	0	0	0	0	0	0	0	0	0	0	0	0	0	0	0	0	0	0	0	0	0	0	0	0	0	0	--	--	--	--	--	--	--	--	--	--	--
HORVU.MOREX.r3.1HG0003110	HORVU.MOREX.r3.1HG0003110	--	0	0	0	0	0	0	0	0	0	0	0	0	0	0	0	0	0	0	0	0	0	0	0	0	0	0	0	0	0	0	0	0	0	0	0	0	--	--	--	--	--	--	--	--	--	--	--
HORVU.MOREX.r3.1HG0003120	HORVU.MOREX.r3.1HG0003120	--	0	0	0	0	0	0	0	0	0	0	0	0	0	0	0	0	0	0	0	0	0	0	0	0	0	0	0	0	0	0	0	0	0	0	0	0	--	--	--	--	--	--	--	--	--	--	--
HORVU.MOREX.r3.1HG0003130	HORVU.MOREX.r3.1HG0003130	--	9.06393	1290	8.76635	1218	9.25637	1319	8.74173	1159	8.14687	1089	9.30392	1333	5.79244	921	5.77328	766	5.28117	829	7.33646	977	8.36459	1141	6.90098	912	7.88547	1151	8.30013	1100	8.03683	1045	9.20534	1258	9.18504	1222	9.61578	1260	0.141616	0.144828	normal	9.47456e-14	0.646408	normal	4.36776e-05	0.417067	normal	0.000385037	0.373423
HORVU.MOREX.r3.1HG0003140	HORVU.MOREX.r3.1HG0003140	LOC100831731	281.056	18045	283.316	17756	275.304	17695	184.198	11012	185.476	11182	181.205	11712	242.227	17368	231.818	13868	243.884	17261	212.158	12743	220.512	13560	211.728	12623	343.091	22579	360.164	21519	344.232	20184	325.279	20051	329.451	19771	320.276	18933	6.26245e-17	-0.413308	normal	1.20306e-06	0.189886	normal	0.000147698	-0.15591	normal	0.275676	-0.0634082
HORVU.MOREX.r3.1HG0003150	HORVU.MOREX.r3.1HG0003150	--	11.5523	468	10.1392	401	10.1588	412	10.4656	395	9.9725	380	10.2689	419	13.7252	621	12.4555	471	14.6993	657	13.5566	514	11.1815	434	14.3991	542	9.37535	390	10.7459	406	9.09289	337	10.0752	392	12.7818	484	13.0485	487	0.356612	0.140445	normal	0.00256071	-0.393659	normal	0.721357	-0.0633803	normal	0.23188	-0.184968
HORVU.MOREX.r3.1HG0003160	HORVU.MOREX.r3.1HG0003160	--	0.191026	13	0	0	0.220066	15	0	0	0	0	0	0	0.212809	16	0.209331	13	0.390246	29	0	0	0.152128	10	0.107992	7	10.2548	699	11.1504	690	13.4251	816	22.0557	1408	22.5961	1405	22.2424	1362	--	--	--	--	--	--	--	--	--	--	--
HORVU.MOREX.r3.1HG0003170	HORVU.MOREX.r3.1HG0003170	--	0	0	0	0	0	0	0	0	0	0	0	0	0	0	0	0	0	0	0	0	0	0	0	0	0	0	0	0	0	0	0	0	0	0	0	0	--	--	--	--	--	--	--	--	--	--	--
HORVU.MOREX.r3.1HG0003180	HORVU.MOREX.r3.1HG0003180	--	0.178749	10	0.114391	7	0.045591	3	0.153578	8	0.037947	2	0	0	0.115031	8	0.190186	10	0	0	0.038214	3	0	0	0	0	0	0	0	0	0	0	0	0	0	0	0	0	--	--	--	--	--	--	--	--	--	--	--
HORVU.MOREX.r3.1HG0003190	HORVU.MOREX.r3.1HG0003190	--	0	0	0	0	0	0	0	0	0	0	0	0	0	0	0	0	0	0	0	0	0	0	0	0	0	0	0	0	0	0	0	0	0	0	0	0	--	--	--	--	--	--	--	--	--	--	--
HORVU.MOREX.r3.1HG0003200	HORVU.MOREX.r3.1HG0003200	--	0	0	0.072811	2	0	0	0	0	0	0	0	0	0	0	0	0	0	0	0	0	0	0	0	0	0	0	0	0	0	0	0	0	0	0	0	0	--	--	--	--	--	--	--	--	--	--	--
HORVU.MOREX.r3.1HG0003210	HORVU.MOREX.r3.1HG0003210	--	0	0	0	0	0	0	0	0	0	0	0	0	0	0	0	0	0	0	0	0	0	0	0	0	0	0	0	0	0	0	0	0	0	0	0	0	--	--	--	--	--	--	--	--	--	--	--
HORVU.MOREX.r3.1HG0003220	HORVU.MOREX.r3.1HG0003220	--	0	0	0	0	0	0	0	0	0	0	0	0	0	0	0	0	0	0	0	0	0	0	0	0	0	0	0	0	0	0	0	0	0.043242	2	0.021727	1	--	--	--	--	--	--	--	--	--	--	--
HORVU.MOREX.r3.1HG0003230	HORVU.MOREX.r3.1HG0003230	LOC109786212	0	0	0	0	0	0	0	0	0	0	0	0	0	0	0	0	0	0	0	0	0	0	0	0	0	0	0	0	0	0	0	0	0	0	0	0	--	--	--	--	--	--	--	--	--	--	--
HORVU.MOREX.r3.1HG0003240	HORVU.MOREX.r3.1HG0003240	--	0	0	0	0	0	0	0	0	0	0	0	0	0	0	0	0	0	0	0	0	0	0	0	0	0	0	0	0	0	0	0	0	0	0	0	0	--	--	--	--	--	--	--	--	--	--	--
HORVU.MOREX.r3.1HG0003250	HORVU.MOREX.r3.1HG0003250	--	0	0	0	0	0	0	0	0	0	0	0	0	0	0	0	0	0	0	0	0	0	0	0	0	0	0	0.072069	2	0	0	0	0	0	0	0	0	--	--	--	--	--	--	--	--	--	--	--
HORVU.MOREX.r3.1HG0003260	HORVU.MOREX.r3.1HG0003260	LOC109786212	0	0	0	0	0.05925	8	0.015979	3	0.015846	3	0.01478	3	0	0	0.015916	2	0.020246	3	0.054762	7	0.014706	2	0	0	0.014515	3	0.11986	15	0.062942	8	0.112765	15	0.038627	5	0.084192	11	--	--	--	--	--	--	--	--	--	--	--
HORVU.MOREX.r3.1HG0003270	HORVU.MOREX.r3.1HG0003270	--	0	0	0	0	0	0	0	0	0	0	0	0	0	0	0	0	0	0	0	0	0	0	0	0	0	0	0	0	0	0	0	0	0	0	0	0	--	--	--	--	--	--	--	--	--	--	--
HORVU.MOREX.r3.1HG0003280	HORVU.MOREX.r3.1HG0003280	--	0.033564	5	0	0	0.066384	8	0	0	0	0	0	0	0.052546	7	0	0	0	0	0.035399	4	0	0	0	0	0.197938	25	0.205588	23	0.349399	39	0.362874	42	0.549161	62	0.333131	37	--	--	--	--	--	--	--	--	--	--	--
HORVU.MOREX.r3.1HG0003290	HORVU.MOREX.r3.1HG0003290	--	4.29969	648	5.09303	749	4.16395	628	3.40451	478	3.93336	557	4.17756	634	4.08599	688	3.79586	533	3.9962	664	3.23684	457	3.65803	528	3.65778	512	5.33223	824	4.64343	651	4.66428	642	3.23991	469	3.47598	490	3.16567	439	0.803798	-0.03918	normal	0.229372	0.151445	normal	0.208211	-0.167621	normal	0.0349896	0.286706
HORVU.MOREX.r3.1HG0003300	HORVU.MOREX.r3.1HG0003300	--	0	0	0	0	0.117664	6	0	0	0	0	0	0	0	0	0	0	0	0	0	0	0	0	0	0	0	0	0	0	0.128986	6	0.12269	6	0	0	0	0	--	--	--	--	--	--	--	--	--	--	--
HORVU.MOREX.r3.1HG0003310	HORVU.MOREX.r3.1HG0003310	--	1.32604	84	1.40831	87	1.62731	103	1.19811	71	1.69113	100	0.955131	61	0.884091	62	1.13238	67	0.806932	56	1.10996	66	0.529955	32	0.787114	46	0.716963	47	1.18342	70	0.970434	56	0.825403	50	1.45162	86	0.696363	41	0.980739	0.00985853	normal	0.065707	0.564995	normal	0.687751	-0.169395	normal	0.0393779	0.794339
HORVU.MOREX.r3.1HG0003320	HORVU.MOREX.r3.1HG0003320	--	0	0	0	0	0	0	0	0	0	0	0	0	0	0	0	0	0	0	0	0	0	0	0	0	0	0	0	0	0	0	0	0	0	0	0	0	--	--	--	--	--	--	--	--	--	--	--
HORVU.MOREX.r3.1HG0003330	HORVU.MOREX.r3.1HG0003330	--	0	0	0	0	0	0	0	0	0	0	0	0	0	0	0	0	0	0	0	0	0	0	0	0	0	0	0	0	0	0	0	0	0	0	0	0	--	--	--	--	--	--	--	--	--	--	--
HORVU.MOREX.r3.1HG0003340	HORVU.MOREX.r3.1HG0003340	--	0	0	0	0	0	0	0	0	0	0	0	0	0	0	0	0	0	0	0	0	0	0	0	0	0	0	0.073312	1	0	0	0	0	0	0	0	0	--	--	--	--	--	--	--	--	--	--	--
HORVU.MOREX.r3.1HG0003350	HORVU.MOREX.r3.1HG0003350	--	0	0	0	0	0	0	0	0	0	0	0	0	0	0	0	0	0	0	0	0	0	0	0	0	0	0	0	0	0	0	0	0	0	0	0	0	--	--	--	--	--	--	--	--	--	--	--
HORVU.MOREX.r3.1HG0003360	HORVU.MOREX.r3.1HG0003360	--	1.03723	44	1.22426	51	1.23684	53	1.30412	52	0.548522	22	1.1342	49	0.694466	33	1.50876	60	1.88451	89	1.11066	45	0.74463	31	1.18227	47	1.12632	49	1.09088	44	0.777322	31	0.711276	29	0.654692	26	1.27136	50	0.964054	-0.0232914	normal	0.588158	-0.235985	normal	0.451361	-0.314913	normal	0.814344	0.122142
HORVU.MOREX.r3.1HG0003380	HORVU.MOREX.r3.1HG0003380	--	0	0	0	0	0	0	0	0	0	0	0	0	0	0	0	0	0	0	0	0	0	0	0	0	0	0	0	0	0	0	0	0	0	0	0	0	--	--	--	--	--	--	--	--	--	--	--
HORVU.MOREX.r3.1HG0003390	HORVU.MOREX.r3.1HG0003390	--	0	0	0	0	0	0	0	0	0	0	0	0	0	0	0	0	0	0	0	0	0	0	0	0	0	0	0	0	0	0	0	0	0	0	0	0	--	--	--	--	--	--	--	--	--	--	--
HORVU.MOREX.r3.1HG0003400	HORVU.MOREX.r3.1HG0003400	--	0	0	0	0	0	0	0	0	0	0	0	0	0	0	0	0	0	0	0	0	0	0	0	0	0	0	0	0	0	0	0	0	0	0	0	0	--	--	--	--	--	--	--	--	--	--	--
HORVU.MOREX.r3.1HG0003410	HORVU.MOREX.r3.1HG0003410	--	0	0	0	0	0	0	0	0	0	0	0	0	0	0	0	0	0	0	0	0	0	0	0	0	0	0	0	0	0	0	0.017546	3	0	0	0	0	--	--	--	--	--	--	--	--	--	--	--
HORVU.MOREX.r3.1HG0003420	HORVU.MOREX.r3.1HG0003420	--	0	0	0	0	0	0	0	0	0	0	0	0	0	0	0	0	0	0	0	0	0	0	0	0	0	0	0	0	0	0	0	0	0	0	0	0	--	--	--	--	--	--	--	--	--	--	--
HORVU.MOREX.r3.1HG0003430	HORVU.MOREX.r3.1HG0003430	--	14.4153	1296	16.388	1438	16.3006	1467	8.29295	694	9.35329	790	9.14605	828	14.7677	1482	15.1634	1270	15.5631	1542	13.1844	1109	14.1955	1222	14.2496	1189	18.3024	1686	17.7114	1481	20.2982	1666	17.7504	1532	20.5951	1730	18.7829	1554	3.26318e-10	-0.61548	normal	0.885532	0.0146525	normal	0.16256	-0.127115	normal	1.69848e-06	-0.471401
HORVU.MOREX.r3.1HG0003440	HORVU.MOREX.r3.1HG0003440	--	0	0	0	0	0	0	0	0	0	0	0	0	0	0	0	0	0	0	0	0	0	0	0.086332	6	0	0	0	0	0	0	0.101345	7	0	0	0	0	--	--	--	--	--	--	--	--	--	--	--
HORVU.MOREX.r3.1HG0003450	HORVU.MOREX.r3.1HG0003450	--	0	0	0.064696	7	0.068213	7	0	0	0	0	0	0	0	0	0	0	0	0	0	0	0	0	0	0	0	0	0	0	0.010749	2	0	0	0	0	0	0	--	--	--	--	--	--	--	--	--	--	--
HORVU.MOREX.r3.1HG0003460	HORVU.MOREX.r3.1HG0003460	--	0	0	0	0	0	0	0	0	0	0	0	0	0	0	0	0	0	0	0	0	0	0	0	0	0	0	0	0	0	0	0	0	0	0	0	0	--	--	--	--	--	--	--	--	--	--	--
HORVU.MOREX.r3.1HG0003470	HORVU.MOREX.r3.1HG0003470	--	0	0	0	0	0	0	0	0	0	0	0	0	0	0	0	0	0	0	0	0	0	0	0	0	0	0	0	0	0	0	0	0	0	0	0	0	--	--	--	--	--	--	--	--	--	--	--
HORVU.MOREX.r3.1HG0003480	HORVU.MOREX.r3.1HG0003480	--	0	0	0	0	0	0	0	0	0	0	0	0	0	0	0	0	0	0	0	0	0	0	0	0	0	0	0	0	0	0	0	0	0	0	0	0	--	--	--	--	--	--	--	--	--	--	--
HORVU.MOREX.r3.1HG0003490	HORVU.MOREX.r3.1HG0003490	--	0	0	0	0	0	0	0	0	0	0	0	0	0	0	0	0	0	0	0	0	0	0	0	0	0	0	0	0	0	0	0	0	0	0	0	0	--	--	--	--	--	--	--	--	--	--	--
HORVU.MOREX.r3.1HG0003500	HORVU.MOREX.r3.1HG0003500	--	0	0	0	0	0	0	0	0	0	0	0	0	0	0	0	0	0	0	0	0	0	0	0	0	0	0	0	0	0	0	0	0	0	0	0	0	--	--	--	--	--	--	--	--	--	--	--
HORVU.MOREX.r3.1HG0003510	HORVU.MOREX.r3.1HG0003510	--	0	0	0	0	0	0	0	0	0	0	0	0	0	0	0	0	0	0	0	0	0	0	0	0	0	0	0	0	0	0	0	0	0	0	0	0	--	--	--	--	--	--	--	--	--	--	--
HORVU.MOREX.r3.1HG0003520	HORVU.MOREX.r3.1HG0003520	--	0	0	0	0	0	0	0	0	0	0	0	0	0	0	0	0	0	0	0	0	0	0	0	0	0	0	0	0	0	0	0	0	0	0	0	0	--	--	--	--	--	--	--	--	--	--	--
HORVU.MOREX.r3.1HG0003530	HORVU.MOREX.r3.1HG0003530	--	0	0	0	0	0	0	0	0	0	0	0	0	0	0	0	0	0	0	0	0	0	0	0	0	0	0	0	0	0	0	0	0	0	0	0	0	--	--	--	--	--	--	--	--	--	--	--
HORVU.MOREX.r3.1HG0003540	HORVU.MOREX.r3.1HG0003540	--	0	0	0	0	0	0	0	0	0	0	0	0	0	0	0	0	0	0	0	0	0	0	0	0	0	0	0	0	0	0	0	0	0	0	0	0	--	--	--	--	--	--	--	--	--	--	--
HORVU.MOREX.r3.1HG0003550	HORVU.MOREX.r3.1HG0003550	--	0	0	0	0	0	0	0	0	0	0	0	0	0	0	0	0	0	0	0	0	0	0	0	0	0	0	0	0	0	0	0	0	0	0	0	0	--	--	--	--	--	--	--	--	--	--	--
HORVU.MOREX.r3.1HG0003560	HORVU.MOREX.r3.1HG0003560	--	0	0	0	0	0	0	0	0	0	0	0	0	0	0	0	0	0	0	0	0	0	0	0	0	0	0	0	0	0	0	0	0	0	0	0	0	--	--	--	--	--	--	--	--	--	--	--
HORVU.MOREX.r3.1HG0003570	HORVU.MOREX.r3.1HG0003570	--	0	0	0	0	0	0	0	0	0	0	0	0	0	0	0	0	0	0	0	0	0	0	0	0	0	0	0	0	0	0	0	0	0	0	0	0	--	--	--	--	--	--	--	--	--	--	--
HORVU.MOREX.r3.1HG0003580	HORVU.MOREX.r3.1HG0003580	--	0	0	0	0	0	0	0	0	0	0	0	0	0	0	0	0	0	0	0	0	0	0	0	0	0	0	0	0	0	0	0	0	0	0	0	0	--	--	--	--	--	--	--	--	--	--	--
HORVU.MOREX.r3.1HG0003590	HORVU.MOREX.r3.1HG0003590	--	0	0	0	0	0	0	0	0	0	0	0	0	0	0	0	0	0	0	0	0	0	0	0	0	0	0	0	0	0	0	0	0	0	0	0	0	--	--	--	--	--	--	--	--	--	--	--
HORVU.MOREX.r3.1HG0003600	HORVU.MOREX.r3.1HG0003600	--	0	0	0	0	0	0	0	0	0	0	0	0	0	0	0	0	0	0	0	0	0	0	0	0	0	0	0	0	0	0	0	0	0	0	0	0	--	--	--	--	--	--	--	--	--	--	--
HORVU.MOREX.r3.1HG0003610	HORVU.MOREX.r3.1HG0003610	--	7.29169	425	8.44212	480	9.35678	546	5.23994	284	5.73329	314	5.50893	323	5.91281	385	5.28424	287	6.03675	388	5.84071	318	6.55554	366	6.75216	365	3.81374	228	3.31711	180	4.56207	243	4.30602	241	4.06205	221	3.83508	206	0.00760919	-0.40673	normal	0.000630229	0.497631	normal	0.414242	0.143302	normal	0.772052	-0.0528269
HORVU.MOREX.r3.1HG0003620	HORVU.MOREX.r3.1HG0003620	--	0	0	0	0	0	0	0.773721	50	0.722063	47	1.05059	72	0.024488	2	0	0	0.1404	11	0	0	0	0	0	0	0	0	0	0	0	0	0	0	0	0	0	0	2.6035e-18	4.63405	up	--	--	--	--	--	--	2.51847e-14	5.73012
HORVU.MOREX.r3.1HG0003630	HORVU.MOREX.r3.1HG0003630	--	0	0	0	0	0	0	0	0	0	0	0	0	0	0	0	0	0	0	0	0	0	0	0	0	0	0	0	0	0	0	0	0	0	0	0	0	--	--	--	--	--	--	--	--	--	--	--
HORVU.MOREX.r3.1HG0003640	HORVU.MOREX.r3.1HG0003640	--	0	0	0	0	0	0	0	0	0	0	0	0	0	0	0	0	0	0	0	0	0	0	0	0	0	0	0	0	0	0	0	0	0	0	0	0	--	--	--	--	--	--	--	--	--	--	--
HORVU.MOREX.r3.1HG0003650	HORVU.MOREX.r3.1HG0003650	--	0	0	0	0	0	0	0.058145	4	0.08649	6	0	0	0	0	0	0	0	0	0	0	0.056151	4	0	0	0	0	0	0	0	0	0	0	0	0	0	0	--	--	--	--	--	--	--	--	--	--	--
HORVU.MOREX.r3.1HG0003660	HORVU.MOREX.r3.1HG0003660	--	10.4077	471	11.7242	518	11.7595	532	9.25398	390	8.83984	376	9.27008	422	4.88096	247	4.92743	208	5.5698	278	6.13938	260	6.94979	301	6.83586	287	3.51871	163	3.51272	148	3.3819	140	4.41095	192	5.04799	214	5.00925	209	0.45022	-0.112383	normal	7.67509e-15	1.08618	up	0.0413126	0.354286	normal	3.01715e-05	0.617101
HORVU.MOREX.r3.1HG0003690	HORVU.MOREX.r3.1HG0003690	--	40.0619	6694	41.2786	6733	40.599	6791	36.6015	5695	39.1148	6137	44.027	7406	51.5068	9611	49.8211	7756	49.9394	9199	50.5637	7904	44.3983	7105	49.2671	7644	53.3206	9133	53.0578	8250	53.1384	8109	53.3604	8560	53.8962	8418	54.7566	8424	0.0236308	0.166872	normal	2.05941e-16	-0.346212	normal	0.282326	-0.0685713	normal	0.186991	-0.106236
HORVU.MOREX.r3.1HG0003700	HORVU.MOREX.r3.1HG0003700	--	2.6703	205	2.94049	221	2.99859	231	0.634052	46	1.08475	79	0.825071	64	2.98549	256	2.47496	177	3.0289	257	3.20238	230	3.31629	244	3.17206	226	3.20761	253	2.60554	186	2.78201	195	3.58679	265	3.25191	234	3.57157	253	4.2157e-10	-1.49017	down	0.942999	-0.0159131	normal	0.393902	0.177838	normal	5.52149e-13	-1.72321
HORVU.MOREX.r3.1HG0003710	HORVU.MOREX.r3.1HG0003710	--	11.3389	571	11.4219	562	11.4811	579	8.50341	399	8.6225	408	9.58871	486	11.2323	632	12.2809	576	10.5069	584	9.66653	456	10.3952	502	9.86707	462	6.40164	331	7.19695	338	6.40679	295	7.4669	361	6.86117	323	6.99954	325	0.23133	-0.162338	normal	0.862231	-0.024502	normal	0.193307	-0.178132	normal	0.986572	-0.00282529
HORVU.MOREX.r3.1HG0003720	HORVU.MOREX.r3.1HG0003720	--	0	0	0	0	0	0	0	0	0	0	0	0	0	0	0	0	0	0	0	0	0	0	0	0	0	0	0	0	0	0	0	0	0	0	0	0	--	--	--	--	--	--	--	--	--	--	--
HORVU.MOREX.r3.1HG0003730	HORVU.MOREX.r3.1HG0003730	--	0	0	0	0	0	0	0	0	0	0	0	0	0	0	0	0	0	0	0.026383	2	0	0	0	0	0	0	0	0	0	0	0.053189	5	0	0	0	0	--	--	--	--	--	--	--	--	--	--	--
HORVU.MOREX.r3.1HG0003740	HORVU.MOREX.r3.1HG0003740	--	0	0	0	0	0	0	0	0	0	0	0	0	0	0	0	0	0	0	0	0	0	0	0	0	0	0	0	0	0	0	0	0	0	0	0	0	--	--	--	--	--	--	--	--	--	--	--
HORVU.MOREX.r3.1HG0003750	HORVU.MOREX.r3.1HG0003750	--	0	0	0	0	0	0	0	0	0	0	0.176665	14	0	0	0.058438	4	0.147103	12	0	0	0.233111	17	0.058932	4	0	0	0	0	0	0	0	0	0.025174	2	0.028924	2	--	--	--	--	--	--	--	--	--	--	--
HORVU.MOREX.r3.1HG0003760	HORVU.MOREX.r3.1HG0003760	--	0	0	0	0	0	0	0	0	0.099518	2	0.066453	1	0	0	0	0	0	0	0	0	0	0	0	0	0	0	0	0	0	0	0	0	0	0	0	0	--	--	--	--	--	--	--	--	--	--	--
HORVU.MOREX.r3.1HG0003780	HORVU.MOREX.r3.1HG0003780	--	0	0	0	0	0	0	0	0	0	0	0	0	0.49934	28	0	0	0.070665	4	0.297683	14	0.166552	9	0	0	0	0	0	0	0	0	0	0	0	0	0	0	--	--	--	--	--	--	--	--	--	--	--
HORVU.MOREX.r3.1HG0003790	HORVU.MOREX.r3.1HG0003790	--	0	0	0	0	0	0	0	0	0	0	0	0	0	0	0	0	0	0	0	0	0	0	0	0	0	0	0	0	0	0	0	0	0	0	0	0	--	--	--	--	--	--	--	--	--	--	--
HORVU.MOREX.r3.1HG0003800	HORVU.MOREX.r3.1HG0003800	--	0	0	0	0	0	0	0	0	0	0	0	0	0	0	0	0	0	0	0	0	0	0	0	0	0	0	0	0	0	0	0	0	0	0	0	0	--	--	--	--	--	--	--	--	--	--	--
HORVU.MOREX.r3.1HG0003810	HORVU.MOREX.r3.1HG0003810	--	0	0	0	0	0	0	0	0	0	0	0	0	0	0	0	0	0	0	0	0	0	0	0	0	0	0	0	0	0	0	0	0	0	0	0	0	--	--	--	--	--	--	--	--	--	--	--
HORVU.MOREX.r3.1HG0003820	HORVU.MOREX.r3.1HG0003820	--	0	0	0	0	0	0	0	0	0	0	0	0	0	0	0	0	0	0	0	0	0	0	0	0	0	0	0.032273	2	0	0	0	0	0	0	0	0	--	--	--	--	--	--	--	--	--	--	--
HORVU.MOREX.r3.1HG0003830	HORVU.MOREX.r3.1HG0003830	--	0	0	0	0	0.157001	4	1.10198	27	0.560482	14	0.273228	7	0	0	0	0	0	0	0	0	0.110772	3	0	0	0	0	0.08445	3	0	0	0	0	0.084077	3	0.153069	4	--	--	--	--	--	--	--	--	--	--	--
HORVU.MOREX.r3.1HG0003840	HORVU.MOREX.r3.1HG0003840	--	0	0	0.137391	4	0.263376	7	0.421765	11	1.29004	32	0.50297	14	0	0	0	0	0.031448	1	0.202589	5	0.038045	1	0	0	0.122442	4	0	0	0.015239	1	0.079067	3	0.081214	3	0.062661	2	--	--	--	--	--	--	--	--	--	--	--
HORVU.MOREX.r3.1HG0003850	HORVU.MOREX.r3.1HG0003850	--	0	0	0.253452	5	0.472989	9	1.09394	19	1.52069	26	0.424789	8	0	0	0	0	0.032632	1	0	0	0.057488	2	0.274342	5	0	0	0	0	0.085613	2	0.055054	1	0.115847	2	0.081728	2	--	--	--	--	--	--	--	--	--	--	--
HORVU.MOREX.r3.1HG0003860	HORVU.MOREX.r3.1HG0003860	--	27.7703	851	30.2503	905	25.9619	797	20.7257	592	23.6536	681	20.0984	621	32.8131	1123	34.7384	992	33.4648	1131	28.7952	826	25.7894	757	26.6134	758	24.6186	774	24.7784	707	23.8928	669	26.3624	776	26.5656	761	27.1463	766	0.136882	-0.184341	normal	0.00157954	-0.300532	normal	0.00129722	-0.309764	normal	0.181407	-0.168607
HORVU.MOREX.r3.1HG0003870	HORVU.MOREX.r3.1HG0003870	--	0	0	0.154398	2	0	0	0	0	0	0	0	0	0	0	0	0	0	0	0	0	0.130596	2	0	0	0.081517	2	0	0	0	0	0	0	0	0	0.083515	1	--	--	--	--	--	--	--	--	--	--	--
HORVU.MOREX.r3.1HG0003890	HORVU.MOREX.r3.1HG0003890	--	0.738629	26	1.85745	62	1.68768	58	0.164459	6	0.716369	23	0.274468	10	1.7575	67	2.25891	72	1.76343	67	1.62482	52	2.21948	73	1.33492	43	1.41693	50	1.37495	44	1.31647	41	1.9162	63	1.57774	51	2.05739	65	--	--	--	0.29215	-0.417422	normal	0.756774	-0.124571	normal	0.00036088	-1.80593
HORVU.MOREX.r3.1HG0003900	HORVU.MOREX.r3.1HG0003900	--	6.93982	496	7.12309	497	7.25022	518	4.25528	283	4.88976	328	4.27449	307	4.17193	333	4.6712	311	4.76227	375	4.42827	296	4.48542	307	5.24773	348	2.6366	193	1.81479	121	2.45969	161	3.95509	271	2.94234	197	2.86684	189	0.000821693	-0.468455	normal	4.00411e-06	0.605155	normal	0.789824	0.0550608	normal	0.654552	0.083839
HORVU.MOREX.r3.1HG0003910	HORVU.MOREX.r3.1HG0003910	--	0	0	0	0	0	0	0	0	0	0	0	0	0	0	0	0	0	0	0	0	0	0	0	0	0	0	0	0	0	0	0	0	0	0	0	0	--	--	--	--	--	--	--	--	--	--	--
HORVU.MOREX.r3.1HG0003920	HORVU.MOREX.r3.1HG0003920	--	0	0	0	0	0	0	0	0	0	0	0	0	0	0	0	0	0	0	0	0	0	0	0	0	0	0	0	0	0	0	0	0	0	0	0	0	--	--	--	--	--	--	--	--	--	--	--
HORVU.MOREX.r3.1HG0003940	HORVU.MOREX.r3.1HG0003940	--	0	0	0	0	0	0	0	0	0	0	0	0	0	0	0	0	0	0	0	0	0	0	0	0	0.035912	1	0.048078	1	0.266038	3	0.113254	2	0	0	0.197445	3	--	--	--	--	--	--	--	--	--	--	--
HORVU.MOREX.r3.1HG0003950	HORVU.MOREX.r3.1HG0003950	--	35.709	3181	34.3506	2987	36.9158	3286	37.4379	3104	35.163	2936	35.0003	3145	40.31	4007	39.2613	3262	42.2271	4155	32.8693	2739	33.1365	2828	38.4897	3181	39.1989	3577	40.9513	3396	40.1244	3265	34.758	2970	41.6958	3471	37.4366	3070	0.0055567	0.2023	normal	0.000242169	-0.224305	normal	0.0018109	-0.221784	normal	0.0130034	0.205363
HORVU.MOREX.r3.1HG0003970	HORVU.MOREX.r3.1HG0003970	--	0	0	0	0	0	0	0	0	0	0	0	0	0.080272	3	0	0	0	0	0.095823	3	0	0	0	0	0	0	0	0	0	0	0	0	0	0	0	0	--	--	--	--	--	--	--	--	--	--	--
HORVU.MOREX.r3.1HG0003980	HORVU.MOREX.r3.1HG0003980	--	0	0	0	0	0	0	0	0	0	0	0	0	0	0	0	0	0	0	0	0	0	0	0	0	0	0	0	0	0	0	0	0	0	0	0	0	--	--	--	--	--	--	--	--	--	--	--
HORVU.MOREX.r3.1HG0003990	HORVU.MOREX.r3.1HG0003990	--	0	0	0	0	0	0	0	0	0	0	0	0	0	0	0	0	0	0	0	0	0	0	0	0	0	0	0	0	0	0	0	0	0	0	0	0	--	--	--	--	--	--	--	--	--	--	--
HORVU.MOREX.r3.1HG0004000	HORVU.MOREX.r3.1HG0004000	LOC112937462	0	0	0	0	0	0	0	0	0	0	0	0	0	0	0	0	0	0	0	0	0	0	0	0	0	0	0	0	0	0	0	0	0	0	0	0	--	--	--	--	--	--	--	--	--	--	--
HORVU.MOREX.r3.1HG0004010	HORVU.MOREX.r3.1HG0004010	--	0	0	0	0	0	0	0	0	0	0	0	0	0	0	0	0	0	0	0	0	0	0	0	0	0	0	0	0	0	0	0	0	0	0	0	0	--	--	--	--	--	--	--	--	--	--	--
HORVU.MOREX.r3.1HG0004020	HORVU.MOREX.r3.1HG0004020	--	0	0	0	0	0	0	0	0	0	0	0	0	0	0	0	0	0	0	0	0	0	0	0	0	0	0	0	0	0	0	0	0	0	0	0	0	--	--	--	--	--	--	--	--	--	--	--
HORVU.MOREX.r3.1HG0004030	HORVU.MOREX.r3.1HG0004030	--	0.215244	12	0.067318	4	0.027578	2	0.27477	14	0.059871	3	0.245957	14	0.329438	20	0.144202	8	0.389388	23	0	0	0.03913	2	0.077224	4	0.232717	13	0.256543	13	0.282618	14	0.058553	3	0.100238	5	0	0	--	--	--	--	--	--	--	--	--	--	--
HORVU.MOREX.r3.1HG0004040	HORVU.MOREX.r3.1HG0004040	--	0.100522	2	0.131991	2	0.13624	2	0.101369	2	0.210596	3	0	0	0.294972	5	0.482716	7	0.331793	6	0	0	0	0	0.072171	1	0.367868	6	0.031443	1	0.36743	5	0	0	0.067152	1	0.043057	1	--	--	--	--	--	--	--	--	--	--	--
HORVU.MOREX.r3.1HG0004050	HORVU.MOREX.r3.1HG0004050	--	0.567028	6	0	0	0.192339	2	0.640147	6	0.975579	9	0.158925	2	0.690944	8	0.499178	5	0.900979	10	0.09156	1	0	0	0	0	1.35361	14	0.665633	6	1.18058	11	0.154839	2	0.135567	2	0	0	--	--	--	--	--	--	--	--	--	--	--
HORVU.MOREX.r3.1HG0004060	HORVU.MOREX.r3.1HG0004060	--	0	0	0	0	0	0	0.960127	37	0.580537	23	0.648954	27	0.359454	17	0.324355	13	0.385041	18	0.433707	17	0.856797	34	0.548108	21	1.04191	44	1.59017	61	1.48674	56	2.9351	116	3.55322	136	3.89744	147	--	--	--	--	--	--	--	--	--	--	--
HORVU.MOREX.r3.1HG0004070	HORVU.MOREX.r3.1HG0004070	--	0	0	0	0	0	0	0	0	0	0	0	0	0	0	0	0	0	0	0	0	0	0	0	0	0	0	0	0	0	0	0	0	0.117483	3	0	0	--	--	--	--	--	--	--	--	--	--	--
HORVU.MOREX.r3.1HG0004080	HORVU.MOREX.r3.1HG0004080	--	0	0	0	0	0	0	0	0	0	0	0	0	0	0	0	0	0	0	0	0	0	0	0	0	0	0	0	0	0	0	0	0	0	0	0	0	--	--	--	--	--	--	--	--	--	--	--
HORVU.MOREX.r3.1HG0004090	HORVU.MOREX.r3.1HG0004090	--	0	0	0	0	0	0	0	0	0	0	0	0	0	0	0	0	0	0	0	0	0	0	0	0	0	0	0	0	0	0	0	0	0.122494	4	0	0	--	--	--	--	--	--	--	--	--	--	--
HORVU.MOREX.r3.1HG0004100	HORVU.MOREX.r3.1HG0004100	--	0	0	0	0	0	0	0	0	0	0	0	0	0	0	0	0	0	0	0	0	0	0	0	0	0	0	0	0	0	0	0	0	0	0	0	0	--	--	--	--	--	--	--	--	--	--	--
HORVU.MOREX.r3.1HG0004110	HORVU.MOREX.r3.1HG0004110	--	10.7741	122	13.6989	152	7.35838	84	0.820098	9	1.35939	15	0.447407	6	10.9462	139	14.4136	153	12.4694	156	9.76345	104	9.81708	107	6.82496	72	3.90057	46	3.06344	33	6.32124	66	2.27445	25	1.45754	16	2.02643	22	1.37464e-14	-2.92569	down	0.332584	-0.274484	normal	0.07469	-0.463927	normal	8.34831e-12	-2.90844
HORVU.MOREX.r3.1HG0004130	HORVU.MOREX.r3.1HG0004130	--	0	0	0.028178	2	0.160844	10	0.266573	15	0.106024	6	0.257958	16	0	0	0	0	0	0	0.070466	4	0.025114	2	0.067277	4	0.032591	3	0	0	0	0	0	0	0	0	0	0	--	--	--	--	--	--	--	--	--	--	--
HORVU.MOREX.r3.1HG0004150	HORVU.MOREX.r3.1HG0004150	LOC109742024	11.7321	947	11.2204	885	11.6773	949	12.1928	918	9.59583	728	13.305	1078	9.42071	855	8.68877	657	8.32991	746	11.0181	836	8.06644	626	9.43826	710	7.50066	624	8.06878	614	7.73539	577	8.85721	688	7.57152	573	7.94519	596	0.109821	0.207517	normal	0.000486657	0.345889	normal	0.503371	0.103816	normal	0.00150901	0.452746
HORVU.MOREX.r3.1HG0004160	HORVU.MOREX.r3.1HG0004160	--	7.11422	585	6.1001	490	6.42908	529	9.65224	739	9.81584	758	7.17415	594	9.99519	918	10.3756	795	11.4896	1041	10.0516	773	10.2577	808	9.3924	717	8.59848	725	8.55729	655	9.22365	693	11.8167	933	11.4665	881	11.1052	841	9.3892e-06	0.624626	normal	3.86268e-11	-0.726937	normal	0.422206	-0.100097	normal	0.96818	0.0067629
HORVU.MOREX.r3.1HG0004170	HORVU.MOREX.r3.1HG0004170	--	0	0	0	0	0	0	0	0	0	0	0	0	0	0	0.058081	2	0	0	0	0	0	0	0	0	0	0	0.091625	2	0	0	0	0	0	0	0.06561	2	--	--	--	--	--	--	--	--	--	--	--
HORVU.MOREX.r3.1HG0004180	HORVU.MOREX.r3.1HG0004180	--	0	0	0	0	0	0	0	0	0	0	0	0	0	0	0	0	0	0	0	0	0	0	0	0	0	0	0	0	0	0	0	0	0	0	0.037516	2	--	--	--	--	--	--	--	--	--	--	--
HORVU.MOREX.r3.1HG0004190	HORVU.MOREX.r3.1HG0004190	--	0	0	0	0	0	0	0.51961	5	0.087078	1	0	0	0	0	0.306055	3	0.237227	3	0	0	0.171444	2	0	0	0.263031	3	0.092946	1	0.10951	1	0.100645	1	0.173503	2	0.088804	1	--	--	--	--	--	--	--	--	--	--	--
HORVU.MOREX.r3.1HG0004200	HORVU.MOREX.r3.1HG0004200	--	0	0	0	0	0	0	0	0	0	0	0	0	0	0	0	0	0	0	0	0	0	0	0	0	0	0	0	0	0	0	0	0	0	0	0	0	--	--	--	--	--	--	--	--	--	--	--
HORVU.MOREX.r3.1HG0004210	HORVU.MOREX.r3.1HG0004210	--	12.4698	344	12.2562	330	12.71	351	8.19233	211	9.3988	244	7.89777	220	8.04702	248	8.94336	230	7.90069	241	9.46668	245	10.2259	271	9.13136	234	8.29332	235	5.58716	144	5.46192	138	7.45267	198	9.0203	233	6.78639	173	0.0372998	-0.351145	normal	0.000469399	0.544328	normal	0.291907	0.204611	normal	0.948818	-0.0143693
HORVU.MOREX.r3.1HG0004220	HORVU.MOREX.r3.1HG0004220	--	0.27829	13	0.109654	5	0.36238	17	0.525104	23	0.120833	6	0.550196	26	0.133671	7	0.091138	4	0.151084	8	0.638269	28	1.01937	46	0.658582	29	19.6543	942	21.0267	915	20.8259	889	31.5175	1414	31.8297	1390	30.0093	1291	--	--	--	--	--	--	--	--	--	--	--
HORVU.MOREX.r3.1HG0004230	HORVU.MOREX.r3.1HG0004230	--	0.582091	60	0.569356	57	0.875967	90	0.49462	47	0.417071	40	0.338318	35	0	0	0.02104	2	0	0	0.104075	10	0.074504	8	0.315201	30	0	0	0	0	0	0	0.033826	4	0.022441	3	0.021221	2	0.212568	-0.467944	normal	7.33177e-18	4.40058	up	--	--	--	--	--
HORVU.MOREX.r3.1HG0004240	HORVU.MOREX.r3.1HG0004240	--	1.38839	59	1.45029	60	1.45758	62	6.58299	257	5.61843	221	5.05827	213	1.80583	85	2.65143	104	3.55822	165	1.50062	59	1.83181	74	2.20207	86	1.29321	56	1.20366	47	1.55855	60	0.721807	29	1.33785	53	1.24633	48	7.67841e-22	2.10252	up	0.00476693	-0.865287	normal	0.141911	-0.459747	normal	2.46573e-14	1.76763
HORVU.MOREX.r3.1HG0004250	HORVU.MOREX.r3.1HG0004250	--	0	0	0	0	0	0	0	0	0	0	0	0	0	0	0	0	0	0	0	0	0	0	0	0	0	0	0	0	0	0	0	0	0	0	0	0	--	--	--	--	--	--	--	--	--	--	--
HORVU.MOREX.r3.1HG0004260	HORVU.MOREX.r3.1HG0004260	--	0	0	0	0	0	0	0	0	0	0	0	0	0	0	0	0	0	0	0	0	0	0	0	0	0	0	0	0	0	0	0	0	0	0	0	0	--	--	--	--	--	--	--	--	--	--	--
HORVU.MOREX.r3.1HG0004270	HORVU.MOREX.r3.1HG0004270	--	0	0	0	0	0	0	0	0	0.344482	14	0.413	18	0.096136	5	0.230458	9	0.021824	1	0.146542	6	0	0	0	0	0.152658	7	0	0	0.275977	11	0.61865	25	0.750575	29	0.734972	28	--	--	--	--	--	--	--	--	--	--	--
HORVU.MOREX.r3.1HG0004280	HORVU.MOREX.r3.1HG0004280	--	0.201854	4	0.221745	5	0.114701	3	1.02453	20	0.620376	12	0.804376	16	7.68414	167	9.716	177	7.42272	160	11.8233	216	12.8168	239	10.6544	193	19.1973	383	20.5372	372	19.8657	353	14.9641	280	11.9687	218	11.7922	212	--	--	--	2.549e-33	-4.62393	down	0.0186935	0.477693	normal	7.04654e-31	-3.50854
HORVU.MOREX.r3.1HG0004290	HORVU.MOREX.r3.1HG0004290	--	0.797606	7	1.0941	9	0.377776	4	2.22327	18	0.540413	5	2.08082	18	14.7665	139	22.7891	179	20.9673	195	29.8206	235	28.1236	227	22.5901	177	47.2436	408	43.8069	343	39.6268	305	25.4184	206	20.5889	162	20.2452	157	--	--	--	2.1231e-30	-4.12958	down	0.059022	0.428201	normal	2.2878e-28	-3.68916
HORVU.MOREX.r3.1HG0004300	HORVU.MOREX.r3.1HG0004300	--	0	0	0	0	0	0	0	0	0	0	0	0	0	0	0	0	0	0	0	0	0	0	0	0	0	0	0	0	0	0	0	0	0	0	0	0	--	--	--	--	--	--	--	--	--	--	--
HORVU.MOREX.r3.1HG0004310	HORVU.MOREX.r3.1HG0004310	--	0	0	0	0	0	0	0	0	0	0	0	0	0	0	0	0	0	0	0	0	0	0	0	0	0	0	0	0	0	0	0	0	0	0	0	0	--	--	--	--	--	--	--	--	--	--	--
HORVU.MOREX.r3.1HG0004320	HORVU.MOREX.r3.1HG0004320	--	0	0	0	0	0	0	29.0665	258	25.0055	224	23.5471	226	0	0	0	0	0	0	0	0	0	0	0	0	0	0	0	0	0	0	0.079423	1	0	0	0	0	4.46727e-47	6.6229	up	--	--	--	--	--	--	1.05592e-30	7.64327
HORVU.MOREX.r3.1HG0004330	HORVU.MOREX.r3.1HG0004330	--	0	0	0	0	0	0	0	0	0	0	0	0	0	0	0	0	0	0	0	0	0	0	0	0	0	0	0	0	0	0	0	0	0	0	0	0	--	--	--	--	--	--	--	--	--	--	--
HORVU.MOREX.r3.1HG0004340	HORVU.MOREX.r3.1HG0004340	--	1.01514	82	0.911902	72	0.826583	67	3.2458	242	2.48487	187	2.55572	206	2.87273	257	2.96221	221	3.34811	296	3.13132	235	2.76404	212	3.97799	296	3.17022	260	2.19548	164	2.64566	194	3.84609	296	3.8856	291	3.71114	274	1.52958e-14	1.70538	up	2.03395e-16	-1.70595	down	0.682888	0.0974972	normal	0.712181	-0.0886357
HORVU.MOREX.r3.1HG0004350	HORVU.MOREX.r3.1HG0004350	--	0	0	0	0	0	0	0.194629	5	0	0	0.051475	2	0	0	0	0	0	0	0	0	0	0	0	0	0	0	0	0	0	0	0	0	0	0	0	0	--	--	--	--	--	--	--	--	--	--	--
HORVU.MOREX.r3.1HG0004360	HORVU.MOREX.r3.1HG0004360	--	0	0	0	0	0	0	0	0	0	0	0	0	0	0	0	0	0	0	0	0	0	0	0	0	0	0	0	0	0	0	0	0	0	0	0	0	--	--	--	--	--	--	--	--	--	--	--
HORVU.MOREX.r3.1HG0004370	HORVU.MOREX.r3.1HG0004370	--	0	0	0	0	0	0	0	0	0	0	0	0	0	0	0	0	0	0	0	0	0	0	0	0	0	0	0	0	0	0	0	0	0	0	0	0	--	--	--	--	--	--	--	--	--	--	--
HORVU.MOREX.r3.1HG0004380	HORVU.MOREX.r3.1HG0004380	--	0.072364	10	0.40826	52	0	0	0.201367	25	0.081885	10	0.107485	15	0.234919	35	0.012384	2	0.079322	12	0.020601	3	0.92871	116	0.079611	10	0.044875	6	0.135607	17	0.083189	10	0.061873	8	0.100348	13	0.0334	4	--	--	--	--	--	--	--	--	--	--	--
HORVU.MOREX.r3.1HG0004390	HORVU.MOREX.r3.1HG0004390	--	0	0	0	0	0	0	0	0	0	0	0.039576	1	0	0	0	0	0	0	0	0	0	0	0	0	0	0	0	0	0	0	0.052026	1	0	0	0.025188	1	--	--	--	--	--	--	--	--	--	--	--
HORVU.MOREX.r3.1HG0004400	HORVU.MOREX.r3.1HG0004400	--	0	0	0	0	0	0	0	0	0	0	0.045438	1	0	0	0	0	0	0	0	0	0	0	0	0	0	0	0	0	0	0	0.123871	2	0	0	0.067069	1	--	--	--	--	--	--	--	--	--	--	--
HORVU.MOREX.r3.1HG0004410	HORVU.MOREX.r3.1HG0004410	--	2.01892	165	2.06054	164	1.78931	146	2.88367	219	4.67891	358	5.64123	463	5.39039	490	5.14837	391	5.28688	475	6.95057	530	6.89353	538	6.6743	505	7.53192	629	7.3366	556	7.93063	590	10.122	791	8.28482	631	8.69368	652	8.72416e-10	1.31668	up	1.26476e-21	-1.44156	down	0.00277259	0.365825	normal	0.0161154	-0.469778
HORVU.MOREX.r3.1HG0004420	HORVU.MOREX.r3.1HG0004420	--	1.93181	62	1.96923	61	2.20397	70	3.31601	98	7.06632	210	7.12824	227	6.39279	226	5.862	173	7.24909	253	9.81229	291	12.1202	368	8.66945	255	7.92489	257	7.58128	224	8.33291	241	10.1216	308	10.9936	325	10.0131	292	1.37768e-08	1.60389	up	2.24913e-13	-1.64223	down	0.000693689	0.614694	normal	0.0130602	-0.634946
HORVU.MOREX.r3.1HG0004430	HORVU.MOREX.r3.1HG0004430	--	0	0	0.089486	2	0	0	0	0	0	0	0	0	0.204555	5	0.147659	3	0.139402	3	0.141048	3	0.123981	3	0.247009	5	0.295621	6	0.162379	3	0	0	0	0	0.127026	3	0.084981	2	--	--	--	--	--	--	--	--	--	--	--
HORVU.MOREX.r3.1HG0004440	HORVU.MOREX.r3.1HG0004440	--	0	0	0	0	0	0	0	0	0	0	0	0	0	0	0	0	0	0	0	0	0	0	0	0	0	0	0	0	0	0	0	0	0	0	0	0	--	--	--	--	--	--	--	--	--	--	--
HORVU.MOREX.r3.1HG0004450	HORVU.MOREX.r3.1HG0004450	--	0	0	0	0	0	0	0	0	0	0	0	0	0	0	0	0	0	0	0	0	0	0	0	0	0	0	0	0	0	0	0	0	0	0	0	0	--	--	--	--	--	--	--	--	--	--	--
HORVU.MOREX.r3.1HG0004460	HORVU.MOREX.r3.1HG0004460	--	1.44218	186	1.54066	194	2.04244	263	3.08706	370	2.93604	355	3.50332	454	4.57299	657	4.50941	540	4.59725	652	5.02727	605	4.96428	611	5.59728	668	7.0379	927	6.11039	731	6.40317	752	7.1053	877	8.24552	991	7.56416	895	1.5217e-10	1.09167	up	9.35833e-23	-1.45342	down	0.137867	0.183422	normal	3.3114e-05	-0.542794
HORVU.MOREX.r3.1HG0004470	HORVU.MOREX.r3.1HG0004470	--	0	0	0	0	0	0	0	0	0	0	0	0	0	0	0	0	0.080915	1	0	0	0	0	0	0	0	0	0	0	0	0	0	0	0	0	0.025188	1	--	--	--	--	--	--	--	--	--	--	--
HORVU.MOREX.r3.1HG0004480	HORVU.MOREX.r3.1HG0004480	--	0	0	0	0	0	0	0	0	0	0	0	0	0	0	0	0	0	0	0	0	0	0	0	0	0	0	0	0	0	0	0	0	0	0	0.067069	1	--	--	--	--	--	--	--	--	--	--	--
HORVU.MOREX.r3.1HG0004490	HORVU.MOREX.r3.1HG0004490	--	1.66212	136	1.77404	141	1.2151	100	1.86023	141	0	0	0.104307	9	3.97439	362	3.74143	284	3.72991	335	3.49146	266	0.32788	26	2.73191	207	4.43703	371	5.1909	394	4.59301	342	6.18615	484	6.40191	488	4.89898	368	0.662844	-0.283606	normal	1.97553e-12	-1.29952	down	0.4871	-0.339361	normal	0.531328	-0.657512
HORVU.MOREX.r3.1HG0004500	HORVU.MOREX.r3.1HG0004500	--	2.24635	72	1.97775	62	2.18122	70	2.93645	87	0.207729	7	0.191905	7	6.93233	245	7.19588	212	6.37272	223	6.0603	180	1.65719	51	4.40015	130	5.97673	194	7.80889	230	7.19516	208	9.81625	298	11.3921	337	8.54586	249	0.607964	-0.367897	normal	2.29252e-14	-1.63785	down	0.239329	-0.506239	normal	0.236801	-1.1181
HORVU.MOREX.r3.1HG0004510	HORVU.MOREX.r3.1HG0004510	--	0	0	0.029703	1	0	0	0	0	0	0	0	0	0.294182	6	0.093159	2	0.084412	2	0.073696	2	0	0	0	0	0.147732	3	0.135343	3	0	0	0	0	0	0	0.035568	1	--	--	--	--	--	--	--	--	--	--	--
HORVU.MOREX.r3.1HG0004520	HORVU.MOREX.r3.1HG0004520	--	0	0	0	0	0	0	0	0	0	0	0	0	0	0	0	0	0	0	0	0	0	0	0	0	0	0	0	0	0	0	0	0	0	0	0	0	--	--	--	--	--	--	--	--	--	--	--
HORVU.MOREX.r3.1HG0004540	HORVU.MOREX.r3.1HG0004540	--	9.72621	1131	9.61594	1092	9.0144	1050	7.76615	841	6.44027	704	7.82664	917	5.12964	667	5.45498	591	5.82113	747	4.12893	450	4.86821	543	5.23629	566	4.43239	529	4.77201	517	4.49549	478	4.72924	528	4.77002	519	4.81727	516	0.147005	-0.167797	normal	3.69678e-15	0.748062	normal	0.152391	-0.199837	normal	7.10897e-10	0.788168
HORVU.MOREX.r3.1HG0004550	HORVU.MOREX.r3.1HG0004550	--	2.01502	22	3.48242	37	4.6135	51	1.10476	12	1.41741	15	0.36964	5	1.99045	25	2.46668	25	2.97299	36	4.88055	50	7.54962	79	3.88066	40	0.17882	2	0.868918	9	0.691419	7	0.213263	3	0.481397	5	0.362208	4	--	--	--	--	--	--	0.0150781	0.861454	normal	4.54167e-05	-2.0624
HORVU.MOREX.r3.1HG0004560	HORVU.MOREX.r3.1HG0004560	--	37.2391	4351	37.6105	4289	38.666	4522	11.2544	1225	12.1629	1335	12.0305	1415	67.8934	8858	65.4153	7121	72.0211	9275	48.5095	5302	45.9363	5140	50.107	5436	107.014	12815	105.888	11512	104.961	11198	76.1436	8541	75.5986	8255	71.2056	7659	1.09187e-106	-1.47972	down	7.22134e-68	-0.889188	normal	1.57929e-22	-0.504604	normal	1.33893e-168	-1.86192
HORVU.MOREX.r3.1HG0004570	HORVU.MOREX.r3.1HG0004570	--	0	0	0	0	0	0	0	0	0	0	0	0	0	0	0	0	0	0	0	0	0	0	0	0	0	0	0	0	0	0	0.064967	1	0	0	0	0	--	--	--	--	--	--	--	--	--	--	--
HORVU.MOREX.r3.1HG0004580	HORVU.MOREX.r3.1HG0004580	--	0	0	0	0	0	0	0	0	0	0	0	0	0	0	0	0	0	0	0	0	0	0	0	0	0	0	0.013538	1	0	0	0	0	0	0	0	0	--	--	--	--	--	--	--	--	--	--	--
HORVU.MOREX.r3.1HG0004600	HORVU.MOREX.r3.1HG0004600	--	2.25854	168	2.28712	166	2.44611	182	1.29983	90	2.28102	159	1.46665	110	0.220066	19	0.027669	2	0.150666	13	0.947005	66	1.31086	94	1.09428	76	0.078868	6	0	0	0	0	0	0	0	0	0	0	0.323562	-0.266169	normal	4.7271e-27	3.62764	up	5.69001e-10	2.12303	up	0.017783	0.724896
HORVU.MOREX.r3.1HG0004610	HORVU.MOREX.r3.1HG0004610	--	0	0	0	0	0	0	0	0	0	0	0	0	0	0	0	0	0	0	0	0	0	0	0	0	0	0	0	0	0	0	0	0	0	0	0	0	--	--	--	--	--	--	--	--	--	--	--
HORVU.MOREX.r3.1HG0004620	HORVU.MOREX.r3.1HG0004620	--	0	0	0	0	0	0	0	0	0	0	0	0	0	0	0	0	0	0	0	0	0	0	0	0	0	0	0	0	0	0	0	0	0	0	0	0	--	--	--	--	--	--	--	--	--	--	--
HORVU.MOREX.r3.1HG0004640	HORVU.MOREX.r3.1HG0004640	LOC109784102	0	0	0	0	0	0	0	0	0	0	0	0	0	0	0	0	0	0	0	0	0	0	0	0	0	0	0	0	0	0	0	0	0	0	0	0	--	--	--	--	--	--	--	--	--	--	--
HORVU.MOREX.r3.1HG0004650	HORVU.MOREX.r3.1HG0004650	LOC109784111	0	0	0	0	0	0	0	0	0	0	0	0	0	0	0	0	0	0	0	0	0	0	0	0	0	0	0.190131	3	0.337313	5	0.933096	13	0.537624	7	0.888835	12	--	--	--	--	--	--	--	--	--	--	--
HORVU.MOREX.r3.1HG0004660	HORVU.MOREX.r3.1HG0004660	--	23.8283	1240	20.5726	1047	20.8346	1090	19.0317	926	20.1828	977	19.3224	1009	13.9867	806	13.4651	655	14.79	851	13.8743	677	14.7196	730	14.6961	706	13.3211	708	11.521	550	13.0555	612	8.4109	418	10.0754	491	11.2437	535	0.805626	0.029995	normal	1.43162e-09	0.590756	normal	0.830481	0.0304947	normal	1.37821e-09	0.596137
HORVU.MOREX.r3.1HG0004670	HORVU.MOREX.r3.1HG0004670	--	0.609007	50	0.556814	44	0.5647	46	0.327207	25	0.48025	37	0.305684	25	0.612341	56	0.58787	45	0.290244	26	0.271641	21	0.559643	44	0.472914	36	0.420424	35	1.062	80	0.388063	29	1.04069	81	0.790983	60	1.0809	81	0.364243	-0.389833	normal	0.726326	0.1585	normal	0.782057	-0.134243	normal	0.906374	-0.0679781
HORVU.MOREX.r3.1HG0004680	HORVU.MOREX.r3.1HG0004680	--	1.16152	10	1.40763	12	1.86987	16	0.628409	5	1.26659	11	0.233127	2	0.030528	1	0	0	0	0	0.031357	1	0	0	1.12368	9	0	0	0	0	0	0	0	0	0	0	0	0	--	--	--	--	--	--	--	--	--	--	--
HORVU.MOREX.r3.1HG0004690	HORVU.MOREX.r3.1HG0004690	--	15.7483	232	19.5614	281	16.9731	250	9.00805	124	9.28239	129	9.24594	137	14.7169	242	12.8696	177	11.8844	193	12.5276	173	13.8316	195	15.7356	215	27.6118	416	25.3247	347	27.3862	368	24.7979	350	22.2522	306	19.4016	263	0.000287505	-0.706997	normal	0.0593879	0.358973	normal	0.733259	0.0857239	normal	0.0457146	-0.439959
HORVU.MOREX.r3.1HG0004700	HORVU.MOREX.r3.1HG0004700	--	0	0	0	0	0	0	0	0	0	0	0	0	0	0	0	0	0	0	0	0	0	0	0	0	0	0	0	0	0	0	0	0	0	0	0	0	--	--	--	--	--	--	--	--	--	--	--
HORVU.MOREX.r3.1HG0004710	HORVU.MOREX.r3.1HG0004710	--	0.437483	9	0.091713	2	0.043733	1	0.474759	10	0.968736	19	0.503388	11	0	0	0	0	0	0	0	0	0	0	0	0	0	0	0	0	0	0	0	0	0	0	0	0	--	--	--	--	--	--	--	--	--	--	--
HORVU.MOREX.r3.1HG0004720	HORVU.MOREX.r3.1HG0004720	--	0	0	0	0	0	0	0	0	0	0	0	0	0	0	0	0	0	0	0	0	0	0	0	0	0	0	0	0	0	0	0	0	0	0	0	0	--	--	--	--	--	--	--	--	--	--	--
HORVU.MOREX.r3.1HG0004730	HORVU.MOREX.r3.1HG0004730	--	26.5488	1197	27.8355	1225	29.9823	1353	24.8454	1043	27.1209	1148	22.0277	1000	37.7618	1901	40.0469	1682	40.7768	2026	34.9866	1476	34.5457	1492	32.8561	1375	39.0677	1805	36.7143	1540	38.355	1579	52.4949	2272	54.1805	2283	51.7368	2147	0.976193	0.00438763	normal	3.61992e-11	-0.523911	normal	0.00726125	-0.209641	normal	0.00305346	-0.304853
HORVU.MOREX.r3.1HG0004740	HORVU.MOREX.r3.1HG0004740	--	0.576054	8	0.973068	12	0.903178	12	0.608976	8	0.61803	8	1.16609	15	0.66226	10	1.12999	14	1.05141	15	0.858661	11	1.12588	14	0.771333	9	0	0	0.638437	8	2.09993	25	1.40848	17	0.757735	9	0.317734	4	--	--	--	--	--	--	--	--	--	--	--
HORVU.MOREX.r3.1HG0004760	HORVU.MOREX.r3.1HG0004760	--	0	0	0	0	0	0	0	0	0	0	0	0	0	0	0	0	0	0	0	0	0	0	0	0	0	0	0	0	0	0	0	0	0	0	0	0	--	--	--	--	--	--	--	--	--	--	--
HORVU.MOREX.r3.1HG0004770	HORVU.MOREX.r3.1HG0004770	--	0	0	0	0	0	0	0	0	0	0	0	0	0	0	0	0	0	0	0	0	0	0	0	0	0	0	0	0	0	0	0	0	0	0	0	0	--	--	--	--	--	--	--	--	--	--	--
HORVU.MOREX.r3.1HG0004780	HORVU.MOREX.r3.1HG0004780	--	0	0	0	0	0	0	0	0	0	0	0	0	0	0	0	0	0	0	0	0	0	0	0	0	0	0	0	0	0	0	0	0	0	0	0	0	--	--	--	--	--	--	--	--	--	--	--
HORVU.MOREX.r3.1HG0004840	HORVU.MOREX.r3.1HG0004840	--	0	0	0	0	0	0	0	0	0	0	0	0	0	0	0	0	0	0	0	0	0	0	0	0	0	0	0	0	0	0	0	0	0	0	0	0	--	--	--	--	--	--	--	--	--	--	--
HORVU.MOREX.r3.1HG0004850	HORVU.MOREX.r3.1HG0004850	--	0	0	0	0	0	0	0	0	0	0	0	0	0	0	0	0	0	0	0	0	0	0	0	0	0	0	0	0	0	0	0	0	0	0	0	0	--	--	--	--	--	--	--	--	--	--	--
HORVU.MOREX.r3.1HG0004860	HORVU.MOREX.r3.1HG0004860	--	0	0	0	0	0	0	0	0	0	0	0	0	0	0	0	0	0	0	0	0	0	0	0	0	0	0	0	0	0	0	0	0	0	0	0	0	--	--	--	--	--	--	--	--	--	--	--
HORVU.MOREX.r3.1HG0004870	HORVU.MOREX.r3.1HG0004870	--	19.481	1550	18.2045	1414	18.6632	1486	13.5199	1002	13.3939	1001	13.2894	1064	13.4719	1197	13.6466	1012	13.0234	1142	10.2661	764	12.6997	968	13.3254	984	10.552	861	9.46012	701	10.5804	769	10.423	796	10.1954	758	9.85476	722	0.000984108	-0.291587	normal	9.49128e-09	0.452161	normal	0.234171	-0.143694	normal	0.00729814	0.30972
HORVU.MOREX.r3.1HG0004880	HORVU.MOREX.r3.1HG0004880	--	49.9769	1459	54.185	1544	53.0312	1550	51.1645	1391	58.5242	1604	54.1124	1590	59.5499	1941	63.6626	1732	60.6607	1952	65.2603	1782	60.8205	1701	58.0449	1574	50.9495	1525	52.5274	1427	52.8916	1410	58.1316	1629	58.3274	1592	64.3146	1729	0.00458915	0.251895	normal	0.000453963	-0.260422	normal	0.980695	0.00269744	normal	0.952661	-0.00661355
HORVU.MOREX.r3.1HG0004890	HORVU.MOREX.r3.1HG0004890	--	10.4921	664	9.93813	614	9.87435	626	10.3873	612	10.8013	642	10.796	688	12.8806	910	13.564	800	11.2103	782	13.2579	785	12.9262	783	13.4095	788	11.3568	737	11.1699	658	10.8172	625	12.2145	742	12.9422	765	11.143	649	0.0184518	0.269232	normal	0.00197238	-0.344366	normal	0.59079	0.0721001	normal	0.206673	-0.144333
HORVU.MOREX.r3.1HG0004910	HORVU.MOREX.r3.1HG0004910	--	0	0	0	0	0	0	0	0	0	0	0	0	0	0	0	0	0	0	0	0	0	0	0	0	0	0	0	0	0	0	0	0	0	0	0	0	--	--	--	--	--	--	--	--	--	--	--
HORVU.MOREX.r3.1HG0004920	HORVU.MOREX.r3.1HG0004920	--	0	0	0	0	0	0	0	0	0	0	0	0	0	0	0	0	0	0	0	0	0	0	0	0	0	0	0	0	0	0	0	0	0	0	0	0	--	--	--	--	--	--	--	--	--	--	--
HORVU.MOREX.r3.1HG0004940	HORVU.MOREX.r3.1HG0004940	--	2.02873	79	1.1983	46	1.92342	75	0.20783	8	0.962209	36	0.805461	32	15.4915	672	17.622	637	12.7169	544	26.4313	960	26.7181	993	20.9541	755	8.9147	355	10.9443	396	9.34351	331	25.7708	960	28.3627	1029	28.675	1025	0.0237768	-0.997692	normal	1.54871e-59	-3.09168	down	2.03269e-07	0.675395	normal	7.17124e-21	-4.61272
HORVU.MOREX.r3.1HG0004990	HORVU.MOREX.r3.1HG0004990	--	0	0	0.143138	3	0	0	0	0	0	0	0	0	0	0	0	0	0	0	0	0	0.374257	6	0	0	0	0	0	0	0	0	0	0	0	0	0	0	--	--	--	--	--	--	--	--	--	--	--
HORVU.MOREX.r3.1HG0005000	HORVU.MOREX.r3.1HG0005000	--	4.0114	240	3.55442	208	4.57496	274	2.42586	135	2.46427	139	1.44141	87	3.65284	244	3.67687	205	3.76327	248	3.14342	176	5.00069	286	2.79257	155	0.603838	37	0.407412	23	0.891702	49	0.222107	13	0.454727	26	0.312167	18	0.00250761	-0.71762	normal	0.649453	0.0949867	normal	0.948698	-0.0197266	normal	0.0347617	-0.60812
HORVU.MOREX.r3.1HG0005020	HORVU.MOREX.r3.1HG0005020	--	0.157256	3	0.214317	4	0.208969	4	0.109259	2	0	0	0.104261	2	0.093663	2	0.276049	5	0.329508	7	0.055904	1	0	0	0.303995	6	0	0	0	0	0	0	0	0	0.111906	2	0	0	--	--	--	--	--	--	--	--	--	--	--
HORVU.MOREX.r3.1HG0005030	HORVU.MOREX.r3.1HG0005030	--	0	0	0	0	0	0	0	0	0	0	0	0	0	0	0	0	0	0	0	0	0	0	0	0	0	0	0	0	0	0	0	0	0	0	0	0	--	--	--	--	--	--	--	--	--	--	--
HORVU.MOREX.r3.1HG0005040	HORVU.MOREX.r3.1HG0005040	--	26.8382	2021	26.7905	1970	26.1919	1975	18.2603	1281	16.7388	1184	16.7424	1270	28.6638	2411	26.81	1882	26.483	2199	27.4522	1934	24.5664	1772	26.092	1825	22.6058	1745	22.705	1592	23.2649	1600	22.2699	1611	21.6042	1521	23.467	1628	1.44833e-07	-0.429043	normal	0.320023	-0.0738976	normal	0.438833	-0.0692986	normal	8.60427e-07	-0.429717
HORVU.MOREX.r3.1HG0005050	HORVU.MOREX.r3.1HG0005050	--	1.14287	25	0.665594	14	0.96075	21	0	0	0.053277	2	0.011564	1	1.71137	41	2.45359	49	1.70592	40	3.78853	76	4.04549	83	2.75488	55	1.18786	26	1.74679	35	1.46421	29	3.54295	73	4.54515	91	4.07243	80	--	--	--	0.0322386	-0.939967	normal	0.0282266	0.70819	normal	1.35391e-14	-4.92276
HORVU.MOREX.r3.1HG0005060	HORVU.MOREX.r3.1HG0005060	--	0	0	0	0	0	0	0	0	0	0	0	0	0	0	0	0	0	0	0	0	0	0	0	0	0	0	0	0	0	0	0	0	0	0	0	0	--	--	--	--	--	--	--	--	--	--	--
HORVU.MOREX.r3.1HG0005070	HORVU.MOREX.r3.1HG0005070	--	0.179497	5	0.165756	4	0.263564	7	0.264956	6	0.280418	7	0.425574	11	0.296202	8	0.605862	14	0.276114	8	0.408278	10	0.309856	8	0.23769	6	0.690879	18	0.572283	13	0.517431	12	0.343239	8	0.440888	10	0	0	--	--	--	--	--	--	--	--	--	--	--
HORVU.MOREX.r3.1HG0005080	HORVU.MOREX.r3.1HG0005080	--	5.05894	79	5.03242	77	5.66784	88	5.41305	78	4.05333	59	4.37303	69	5.92103	103	5.04539	73	6.02795	103	4.93001	72	5.76889	86	4.26497	62	6.12697	98	5.71657	83	4.10455	58	3.70088	55	4.40023	64	4.23873	61	0.997412	0.00140584	normal	0.67463	-0.133353	normal	0.647564	-0.156526	normal	0.913099	0.0426395
HORVU.MOREX.r3.1HG0005090	HORVU.MOREX.r3.1HG0005090	--	2.54398	191	2.88893	212	2.39916	181	5.99329	419	5.61803	396	7.4612	564	0.307378	26	0.374341	27	0.313817	26	1.32968	94	1.35108	98	1.19284	84	2.74674	212	2.68622	188	2.78125	191	7.53944	543	8.2323	577	8.62758	596	1.38487e-19	1.44894	up	5.8604e-26	2.77341	up	1.53547e-08	1.62485	up	1.8258e-41	2.42408
HORVU.MOREX.r3.1HG0005100	HORVU.MOREX.r3.1HG0005100	--	0	0	0	0	0	0	0	0	0	0	0	0	0	0	0	0	0	0	0	0	0	0	0	0	0	0	0	0	0	0	0	0	0	0	0	0	--	--	--	--	--	--	--	--	--	--	--
HORVU.MOREX.r3.1HG0005110	HORVU.MOREX.r3.1HG0005110	--	0.71993	65	0.708622	62	0.579025	52	0.76973	64	0.616029	52	0.326444	30	0.335711	34	0.443296	37	0.765938	76	0.614091	52	0.591154	51	0.271724	23	0.459418	42	0.266226	23	0.282189	23	0.748766	64	0.725196	61	0.341145	28	0.944462	-0.0327607	normal	0.462444	0.303716	normal	0.930828	-0.0439473	normal	0.486264	0.345441
HORVU.MOREX.r3.1HG0005120	HORVU.MOREX.r3.1HG0005120	--	0.949932	13	0.699043	10	0	0	0.140498	2	0.143811	2	0.335711	5	0.280878	5	0	0	0.067429	2	0.216112	3	0.55309	8	0.423194	6	0.268788	4	0.084669	2	0.237667	3	0.170839	3	0.135188	2	0.218512	3	--	--	--	--	--	--	--	--	--	--	--
HORVU.MOREX.r3.1HG0005130	HORVU.MOREX.r3.1HG0005130	--	0.808423	12	0.489767	7	0.269651	4	0.394327	6	0.060817	1	0.488494	7	0.144105	3	0.091174	2	0.196079	4	0.467134	7	0.193652	3	0.889438	12	0.217314	4	0.178009	3	0.399987	6	0.334747	5	0.031809	1	0.075861	1	--	--	--	--	--	--	--	--	--	--	--
HORVU.MOREX.r3.1HG0005140	HORVU.MOREX.r3.1HG0005140	--	0.066459	1	1.05712	8	0.32844	3	0	0	0	0	0	0	0	0	0	0	0	0	0	0	0	0	0.282527	2	0	0	0.246206	2	0	0	0	0	0	0	0	0	--	--	--	--	--	--	--	--	--	--	--
HORVU.MOREX.r3.1HG0005150	HORVU.MOREX.r3.1HG0005150	--	0	0	0	0	0	0	0	0	0	0	0	0	0	0	0	0	0	0	0	0	0	0	0	0	0	0	0	0	0	0	0	0	0	0	0	0	--	--	--	--	--	--	--	--	--	--	--
HORVU.MOREX.r3.1HG0005170	HORVU.MOREX.r3.1HG0005170	--	0	0	0.017888	2	0	0	0.049882	6	0.113498	13	0	0	0	0	0	0	0	0	0	0	0	0	0	0	0	0	0	0	0	0	0	0	0.018058	2	0	0	--	--	--	--	--	--	--	--	--	--	--
HORVU.MOREX.r3.1HG0005180	HORVU.MOREX.r3.1HG0005180	--	0	0	0	0	0	0	0	0	0	0	0	0	0	0	0	0	0	0	0	0	0	0	0	0	0	0	0	0	0	0	0	0	0	0	0	0	--	--	--	--	--	--	--	--	--	--	--
HORVU.MOREX.r3.1HG0005190	HORVU.MOREX.r3.1HG0005190	--	0	0	0	0	0	0	0	0	0	0	0	0	0	0	0	0	0	0	0	0	0	0	0	0	0	0	0	0	0	0	0	0	0	0	0	0	--	--	--	--	--	--	--	--	--	--	--
HORVU.MOREX.r3.1HG0005200	HORVU.MOREX.r3.1HG0005200	--	0	0	0	0	0	0	0	0	0	0	0	0	0	0	0	0	0	0	0	0	0	0	0	0	0	0	0	0	0	0	0	0	0	0	0	0	--	--	--	--	--	--	--	--	--	--	--
HORVU.MOREX.r3.1HG0005210	HORVU.MOREX.r3.1HG0005210	--	0	0	0	0	0	0	0	0	0	0	0	0	0	0	0	0	0	0	0	0	0	0	0	0	0	0	0	0	0	0	0	0	0	0	0	0	--	--	--	--	--	--	--	--	--	--	--
HORVU.MOREX.r3.1HG0005220	HORVU.MOREX.r3.1HG0005220	--	0	0	0	0	0	0	0	0	0	0	0	0	0	0	0	0	0	0	0	0	0	0	0	0	0	0	0	0	0	0	0	0	0	0	0	0	--	--	--	--	--	--	--	--	--	--	--
HORVU.MOREX.r3.1HG0005230	HORVU.MOREX.r3.1HG0005230	--	0	0	0	0	0	0	0	0	0	0	0	0	0	0	0	0	0	0	0	0	0	0	0	0	0	0	0	0	0	0	0	0	0	0	0	0	--	--	--	--	--	--	--	--	--	--	--
HORVU.MOREX.r3.1HG0005240	HORVU.MOREX.r3.1HG0005240	--	0	0	0	0	0	0	0	0	0	0	0	0	0	0	0	0	0	0	0	0	0	0	0	0	0	0	0	0	0	0	0	0	0	0	0	0	--	--	--	--	--	--	--	--	--	--	--
HORVU.MOREX.r3.1HG0005250	HORVU.MOREX.r3.1HG0005250	--	0	0	0	0	0	0	0	0	0	0	0	0	0	0	0	0	0	0	0	0	0	0	0	0	0	0	0	0	0	0	0	0	0	0	0	0	--	--	--	--	--	--	--	--	--	--	--
HORVU.MOREX.r3.1HG0005260	HORVU.MOREX.r3.1HG0005260	--	0	0	0	0	0	0	0	0	0	0	0	0	0	0	0	0	0	0	0	0	0	0	0	0	0	0	0	0	0	0	0	0	0	0	0	0	--	--	--	--	--	--	--	--	--	--	--
HORVU.MOREX.r3.1HG0005270	HORVU.MOREX.r3.1HG0005270	--	0	0	0	0	0	0	0	0	0	0	0	0	0	0	0	0	0	0	0	0	0	0	0	0	0	0	0	0	0	0	0	0	0	0	0	0	--	--	--	--	--	--	--	--	--	--	--
HORVU.MOREX.r3.1HG0005340	HORVU.MOREX.r3.1HG0005340	--	0	0	0	0	0	0	0	0	0	0	0	0	0	0	0	0	0	0	0	0	0	0	0	0	0	0	0	0	0	0	0	0	0	0	0	0	--	--	--	--	--	--	--	--	--	--	--
HORVU.MOREX.r3.1HG0005350	HORVU.MOREX.r3.1HG0005350	--	0	0	0	0	0	0	0	0	0	0	0	0	0	0	0	0	0	0	0	0	0	0	0	0	0	0	0	0	0	0	0	0	0	0	0	0	--	--	--	--	--	--	--	--	--	--	--
HORVU.MOREX.r3.1HG0005360	HORVU.MOREX.r3.1HG0005360	--	1.89768	114	1.63111	96	1.02466	62	1.31467	74	1.62707	92	0.88748	54	1.26526	85	1.1751	66	1.77861	118	0.778353	44	0.952824	55	1.41635	79	0.451557	28	0.742981	42	0.838961	46	0.810308	47	0.581144	33	0.374318	21	0.903705	-0.0495001	normal	0.857574	0.0663347	normal	0.300541	-0.357388	normal	0.266421	0.432884
HORVU.MOREX.r3.1HG0005370	HORVU.MOREX.r3.1HG0005370	--	7.60517	1023	7.61222	1000	8.95898	1206	8.96944	1123	8.26643	1044	8.71241	1180	6.13285	921	6.36285	798	6.11381	907	6.63447	835	5.9698	769	7.17166	896	4.48864	619	4.57981	574	4.92293	605	4.93039	637	5.52049	694	4.55856	565	0.00518519	0.293311	normal	0.000767888	0.340465	normal	0.498818	0.0858327	normal	6.74272e-08	0.553067
HORVU.MOREX.r3.1HG0005380	HORVU.MOREX.r3.1HG0005380	--	0	0	0	0	0	0	0	0	0	0	0	0	0	0	0	0	0	0	0	0	0	0	0	0	0	0	0	0	0	0	0	0	0	0	0	0	--	--	--	--	--	--	--	--	--	--	--
HORVU.MOREX.r3.1HG0005390	HORVU.MOREX.r3.1HG0005390	--	0	0	0	0	0	0	0	0	0	0	0	0	0	0	0	0	0	0	0	0	0	0	0.074713	2	0	0	0	0	0	0	0	0	0.079522	2	0	0	--	--	--	--	--	--	--	--	--	--	--
HORVU.MOREX.r3.1HG0005400	HORVU.MOREX.r3.1HG0005400	--	18.9968	1174	17.8557	1077	16.7464	1036	23.2733	1339	22.4631	1303	22.7377	1414	17.5388	1210	16.7509	965	16.5847	1130	16.7725	970	16.7599	992	15.4014	884	17.1162	1084	18.1759	1045	16.4822	930	16.7672	995	17.9578	1037	16.0206	912	8.68328e-10	0.543984	normal	0.711315	0.0389406	normal	0.634773	-0.0553859	normal	4.73002e-13	0.644971
HORVU.MOREX.r3.1HG0005410	HORVU.MOREX.r3.1HG0005410	--	46.0929	2274	48.67	2344	45.9923	2272	41.3922	1902	40.9854	1899	37.6112	1868	41.3431	2278	38.5665	1773	40.8818	2224	34.0257	1571	36.4932	1725	39.4352	1807	35.9915	1820	37.604	1727	35.2937	1590	45.7351	2167	43.0199	1984	42.8689	1948	0.702304	-0.0358964	normal	0.00660149	0.183555	normal	0.107709	-0.135231	normal	0.00121242	0.288284
HORVU.MOREX.r3.1HG0005420	HORVU.MOREX.r3.1HG0005420	--	8.37015	565	9.97454	657	10.9737	742	4.28817	270	4.50658	286	4.49127	305	16.3719	1234	18.5099	1164	16.077	1196	11.8763	750	12.1552	786	11.1736	700	16.1713	1119	17.3618	1090	15.7358	970	13.6151	882	13.0189	821	13.483	838	2.83674e-11	-0.933824	normal	1.0566e-13	-0.824381	normal	2.99373e-08	-0.524161	normal	7.32786e-24	-1.23641
HORVU.MOREX.r3.1HG0005430	HORVU.MOREX.r3.1HG0005430	--	0	0	0	0	0	0	0	0	0	0	0	0	0	0	0	0	0	0	0	0	0	0	0	0	0	0	0	0	0	0	0	0	0	0	0	0	--	--	--	--	--	--	--	--	--	--	--
HORVU.MOREX.r3.1HG0005440	HORVU.MOREX.r3.1HG0005440	LOC109753579	0	0	0	0	0	0	0	0	0	0	0	0	0	0	0	0	0	0	0	0	0	0	0	0	0	0	0	0	0	0	0	0	0	0	0	0	--	--	--	--	--	--	--	--	--	--	--
HORVU.MOREX.r3.1HG0005450	HORVU.MOREX.r3.1HG0005450	LOC109753579	0	0	0	0	0	0	0	0	0	0	0	0	0	0	0	0	0	0	0	0	0	0	0	0	0	0	0	0	0	0	0	0	0	0	0	0	--	--	--	--	--	--	--	--	--	--	--
HORVU.MOREX.r3.1HG0005460	HORVU.MOREX.r3.1HG0005460	--	0	0	0	0	0	0	0	0	0	0	0	0	0	0	0	0	0	0	0	0	0	0	0	0	0	0	0	0	0	0	0	0	0	0	0	0	--	--	--	--	--	--	--	--	--	--	--
HORVU.MOREX.r3.1HG0005470	HORVU.MOREX.r3.1HG0005470	--	0	0	0	0	0	0	0	0	0	0	0	0	0	0	0	0	0	0	0	0	0	0	0	0	0	0	0	0	0	0	0	0	0	0	0	0	--	--	--	--	--	--	--	--	--	--	--
HORVU.MOREX.r3.1HG0005480	HORVU.MOREX.r3.1HG0005480	--	3.42747	78	4.32483	96	3.92061	89	1.92665	41	3.69207	79	2.07465	48	4.3212	110	3.2951	70	4	100	3.95905	84	5.23622	114	3.37271	71	2.74026	64	2.58972	55	1.22339	26	2.46985	54	2.89435	62	2.46693	52	0.295562	-0.370262	normal	0.922562	-0.0322571	normal	0.7931	0.0945507	normal	0.163645	-0.517821
HORVU.MOREX.r3.1HG0005490	HORVU.MOREX.r3.1HG0005490	--	0	0	0	0	0	0	0	0	0	0	0	0	0	0	0	0	0	0	0	0	0	0	0	0	0	0	0	0	0	0	0	0	0	0	0	0	--	--	--	--	--	--	--	--	--	--	--
HORVU.MOREX.r3.1HG0005500	HORVU.MOREX.r3.1HG0005500	--	4.07669	76	3.59901	65	3.37403	63	171.493	2954	202.861	3524	220.89	4114	0	0	0.042548	1	0	0	0	0	0	0	0.586835	11	0	0	0	0	0	0	0	0	0	0	0	0	0	5.85511	up	7.28822e-19	4.59317	up	--	--	--	0.00131381	3.01356
HORVU.MOREX.r3.1HG0005510	HORVU.MOREX.r3.1HG0005510	--	2.35848	43	2.27532	40	1.96647	36	87.5927	1464	97.1582	1637	106.04	1915	0	0	0	0	0	0	0	0	0	0	0.575555	10	0	0	0	0	0	0	0	0	0	0	0	0	6.18578e-263	5.52475	up	--	--	--	--	--	--	0.000637809	3.18658
HORVU.MOREX.r3.1HG0005520	HORVU.MOREX.r3.1HG0005520	--	1.78498	23	2.28747	28	2.80351	35	116.452	1350	123.745	1446	115.55	1448	0	0	0	0	0	0	0	0	0	0	0.475392	6	0	0	0	0	0	0	0	0	0	0	0	0	1.40427e-234	5.72627	up	--	--	--	--	--	--	5.11466e-12	5.72762
HORVU.MOREX.r3.1HG0005530	HORVU.MOREX.r3.1HG0005530	--	2.04226	34	1.41615	23	2.05199	34	584.625	8972	685.713	10612	772.465	12816	0	0	0	0	0	0	0	0	0.063354	1	0.863734	14	0	0	0	0	0	0	0.008216	1	0	0	0	0	0	8.52659	up	--	--	--	--	--	--	2.83395e-11	5.66425
HORVU.MOREX.r3.1HG0005550	HORVU.MOREX.r3.1HG0005550	--	2.68871	134	2.46894	120	2.28707	114	364.822	16910	411.542	19236	430.226	21559	0	0	0.007187	1	0.004404	1	0	0	0	0	0.526358	25	0	0	0.004318	1	0	0	0	0	0	0	0.005455	1	0	7.47679	up	5.50757e-29	5.28105	up	--	--	--	0.0348918	2.00222
HORVU.MOREX.r3.1HG0005560	HORVU.MOREX.r3.1HG0005560	--	3.97728	227	3.50405	195	3.41848	195	521.695	27666	590.792	31594	647.897	37147	0	0	0.01093	1	0	0	0	0	0.012222	1	1.0661	57	0	0	0.055624	3	0	0	0	0	0	0	0	0	0	7.47886	up	1.20012e-40	6.14521	up	--	--	--	0.00891875	2.47908
HORVU.MOREX.r3.1HG0005580	HORVU.MOREX.r3.1HG0005580	--	17.0543	472	16.9329	458	16.1801	448	45.3389	1168	36.909	959	41.5165	1156	21.3119	659	22.8335	589	22.5239	687	15.985	414	14.6022	387	13.9603	359	32.17	912	32.6571	841	28.7577	727	39.3107	1044	38.8224	1004	41.3672	1054	1.87544e-41	1.48293	up	0.00012253	-0.44173	normal	2.44381e-06	-0.567044	normal	5.50121e-44	1.62909
HORVU.MOREX.r3.1HG0005590	HORVU.MOREX.r3.1HG0005590	--	54.4506	1462	49.7695	1304	48.0776	1292	79.2447	1980	80.6103	2031	67.7394	1830	38.0952	1142	40.5917	1015	33.6851	997	31.5097	791	30.4765	784	33.0432	824	26.1803	721	27.9916	699	28.9348	710	22.395	577	24.8597	624	23.1059	571	1.26054e-16	0.768174	normal	1.99659e-05	0.401977	normal	0.0267883	-0.23669	normal	6.34701e-50	1.41859
HORVU.MOREX.r3.1HG0005600	HORVU.MOREX.r3.1HG0005600	--	8439.34	211310	8839.21	216036	7795.08	195392	4172.15	97270	4139.33	97317	3719.13	93744	5182.42	144911	5263.93	122802	4852.76	133942	4645.65	108820	4413.45	105838	4190.85	97436	3288.16	84392	3440.22	80158	3111.06	71137	3109	74739	2948.48	69006	3003.23	69235	2.95106e-43	-0.862288	normal	6.94565e-53	0.675753	normal	5.57688e-06	-0.206567	normal	0.756281	0.0240731
HORVU.MOREX.r3.1HG0005610	HORVU.MOREX.r3.1HG0005610	--	1.5905	108	1.44545	96	1.55993	106	1.96003	124	2.46207	156	1.86437	127	0.341076	26	0.332015	21	0.384804	29	0.446769	29	0.716767	47	0.3704	24	0.140192	10	0.140723	9	0.165365	11	0.126822	9	0.410468	26	0.087377	6	0.0117142	0.61446	normal	7.85821e-10	1.9248	up	--	--	--	2.09798e-11	2.09941
HORVU.MOREX.r3.1HG0005620	HORVU.MOREX.r3.1HG0005620	--	4.31665	240	4.5678	248	4.43333	247	7.15279	371	6.50243	340	8.29267	464	5.97735	371	4.14496	215	5.01862	308	6.25665	326	6.35375	339	5.12589	265	6.35	362	4.92193	255	5.69994	290	7.00156	374	6.90265	359	5.96026	305	5.15239e-09	0.900528	normal	0.258797	-0.218835	normal	0.285536	0.216362	normal	0.00469561	0.464626
HORVU.MOREX.r3.1HG0005630	HORVU.MOREX.r3.1HG0005630	--	0	0	0	0	0	0	0	0	0	0	0	0	0	0	0	0	0	0	0	0	0	0	0	0	0	0	0	0	0	0	0	0	0	0	0	0	--	--	--	--	--	--	--	--	--	--	--
HORVU.MOREX.r3.1HG0005640	HORVU.MOREX.r3.1HG0005640	--	2.44155	230	2.72778	251	2.28862	216	1.07829	95	0.876438	78	1.12133	107	3.57934	377	2.92653	257	3.66832	381	0.206881	19	0.590415	54	0.430132	38	0.360502	35	0.492112	44	0.46921	41	0.061272	6	0	0	0	0	9.04436e-07	-1.04091	down	0.005005	-0.477707	normal	4.04842e-31	-2.692	down	0.000139294	1.40913
HORVU.MOREX.r3.1HG0005650	HORVU.MOREX.r3.1HG0005650	--	0.951419	23	1.66648	38	0.948094	23	0.391159	9	0.480453	11	0.416609	10	1.13867	30	0.760032	17	1.34261	35	0.115513	3	0.088354	2	0.184729	4	0.290059	7	0.069431	2	0.928503	20	0	0	0	0	0	0	--	--	--	--	--	--	--	--	--	--	--
HORVU.MOREX.r3.1HG0005660	HORVU.MOREX.r3.1HG0005660	--	0	0	0	0	0	0	0	0	0	0	0	0	0	0	0	0	0	0	0	0	0	0	0	0	0	0	0	0	0	0	0	0	0	0	0	0	--	--	--	--	--	--	--	--	--	--	--
HORVU.MOREX.r3.1HG0005680	HORVU.MOREX.r3.1HG0005680	--	0	0	0	0	0	0	0	0	0	0	0	0	0	0	0	0	0	0	0	0	0	0	0	0	0	0	0	0	0	0	0	0	0	0	0	0	--	--	--	--	--	--	--	--	--	--	--
HORVU.MOREX.r3.1HG0005690	HORVU.MOREX.r3.1HG0005690	--	0	0	0	0	0	0	0	0	0	0	0	0	0	0	0	0	0	0	0	0	0	0	0	0	0	0	0	0	0	0	0	0	0	0	0	0	--	--	--	--	--	--	--	--	--	--	--
HORVU.MOREX.r3.1HG0005700	HORVU.MOREX.r3.1HG0005700	LOC109748533	0	0	0	0	0	0	0	0	0	0	0	0	0	0	0	0	0.063692	2	0	0	0	0	0	0	0	0	0	0	0	0	0	0	0	0	0	0	--	--	--	--	--	--	--	--	--	--	--
HORVU.MOREX.r3.1HG0005710	HORVU.MOREX.r3.1HG0005710	LOC109769000	0.805733	20	0.287426	7	0.43091	11	0	0	0	0	0	0	0	0	0	0	0	0	0	0	0	0	0	0	0	0	0	0	0	0	0	0	0	0	0	0	--	--	--	--	--	--	--	--	--	--	--
HORVU.MOREX.r3.1HG0005720	HORVU.MOREX.r3.1HG0005720	LOC109748534	0.660638	15	0.785246	17	0.70501	16	0.150462	3	0	0	0.130509	3	0.935587	23	1.22832	25	1.80413	43	0.111151	3	0.294831	7	0.110309	3	2.81585	62	2.50785	50	3.40912	67	1.10609	23	0.907638	19	1.31131	26	--	--	--	--	--	--	--	--	--	--	--
HORVU.MOREX.r3.1HG0005730	HORVU.MOREX.r3.1HG0005730	--	0.226727	5	0.184894	4	0.297341	6	0.107932	2	0.195544	4	0.128502	3	1.99256	43	1.78813	32	1.1265	24	0.43899	8	0	0	0.316453	6	1.82924	36	2.46522	44	2.96098	52	1.72732	32	0.828893	15	1.47828	27	--	--	--	--	--	--	--	--	--	--	--
HORVU.MOREX.r3.1HG0005750	HORVU.MOREX.r3.1HG0005750	--	106.262	5362	104.619	5153	98.0527	4953	100.676	4730	106.328	5037	97.0336	4929	105.112	5923	98.9851	4653	100.03	5564	98.5257	4651	95.6762	4624	99.5019	4662	104.986	5430	113.314	5320	111.856	5154	112.663	5458	110.262	5200	108.472	5039	0.0126628	0.170419	normal	0.835243	-0.0132652	normal	0.408919	-0.0504665	normal	0.00113417	0.21247
HORVU.MOREX.r3.1HG0005760	HORVU.MOREX.r3.1HG0005760	--	0	0	0	0	0	0	0	0	0	0	0	0	0	0	0	0	0	0	0	0	0	0	0	0	0	0	0	0	0	0	0	0	0	0	0	0	--	--	--	--	--	--	--	--	--	--	--
HORVU.MOREX.r3.1HG0005770	HORVU.MOREX.r3.1HG0005770	--	0	0	0	0	0	0	0	0	0	0	0	0	0	0	0	0	0	0	0	0	0	0	0	0	0	0	0	0	0	0	0	0	0	0	0	0	--	--	--	--	--	--	--	--	--	--	--
HORVU.MOREX.r3.1HG0005780	HORVU.MOREX.r3.1HG0005780	--	2.08587	135	2.33268	148	2.20971	143	1.84459	111	1.80995	110	1.39767	91	2.96039	214	2.33969	141	2.09592	150	2.0649	125	1.6163	100	1.75442	106	2.91237	193	2.03972	123	2.79347	165	2.597	162	1.50353	91	1.79828	107	0.472186	-0.193162	normal	0.447384	-0.187788	normal	0.103666	-0.405291	normal	0.866645	0.0537955
HORVU.MOREX.r3.1HG0005790	HORVU.MOREX.r3.1HG0005790	--	4.42541	356	3.26282	256	3.20164	258	2.31546	174	2.92224	221	2.27171	184	3.96253	356	3.82254	287	3.97781	353	2.40201	181	2.85041	220	2.23256	167	1.68253	139	1.51266	114	1.79217	132	0.932925	72	0.920609	70	0.956511	71	0.113525	-0.332018	normal	0.445342	-0.145407	normal	0.000213944	-0.621075	normal	0.484083	0.164458
HORVU.MOREX.r3.1HG0005800	HORVU.MOREX.r3.1HG0005800	--	0	0	0	0	0	0	0	0	0	0	0	0	0	0	0	0	0	0	0	0	0	0	0	0	0	0	0	0	0	0	0	0	0	0	0	0	--	--	--	--	--	--	--	--	--	--	--
HORVU.MOREX.r3.1HG0005810	HORVU.MOREX.r3.1HG0005810	--	8.92562	471	9.25719	477	9.11151	481	5.2381	257	5.60468	278	5.13753	273	7.05456	416	6.35142	312	5.95303	346	7.13915	352	8.13971	411	6.08907	298	5.42175	293	6.14997	302	4.79767	231	5.70111	289	5.47676	270	6.37397	310	4.92677e-05	-0.570702	normal	0.000738361	0.454557	normal	0.478533	0.135928	normal	0.158818	-0.25356
HORVU.MOREX.r3.1HG0005830	HORVU.MOREX.r3.1HG0005830	--	1.31558	81	1.44589	86	1.36591	84	0.754466	43	0.445214	26	0.434748	27	1.48192	101	1.65368	94	0.818391	55	1.23842	71	1.50621	88	2.26636	129	1.44531	91	1.70872	97	1.17206	66	2.98969	175	3.1621	180	1.59467	90	0.00269178	-1.03998	down	0.925526	0.034969	normal	0.409628	0.29276	normal	0.000226703	-1.38223
HORVU.MOREX.r3.1HG0005840	HORVU.MOREX.r3.1HG0005840	--	4.7352	160	4.41237	145	5.39881	182	4.97681	156	6.38397	202	7.24661	246	4.25349	160	4.54491	143	4.36093	162	4.3137	136	4.16258	134	3.85605	121	2.53329	88	3.13931	99	2.20765	68	2.59365	84	3.34981	106	3.30783	103	0.0140016	0.531408	normal	0.661036	0.107123	normal	0.755187	-0.0869392	normal	0.000749349	0.74443
HORVU.MOREX.r3.1HG0005850	HORVU.MOREX.r3.1HG0005850	--	0	0	0	0	0	0	0	0	0	0	0	0	0	0	0	0	0	0	0	0	0	0	0	0	0	0	0	0	0	0	0	0	0	0	0	0	--	--	--	--	--	--	--	--	--	--	--
HORVU.MOREX.r3.1HG0005860	HORVU.MOREX.r3.1HG0005860	--	0	0	0	0	0	0	0	0	0	0	0	0	0	0	0	0	0	0	0	0	0	0	0	0	0	0	0	0	0	0	0	0	0	0	0	0	--	--	--	--	--	--	--	--	--	--	--
HORVU.MOREX.r3.1HG0005870	HORVU.MOREX.r3.1HG0005870	--	0	0	0	0	0	0	0	0	0	0	0	0	0	0	0	0	0	0	0	0	0	0	0	0	0	0	0	0	0	0	0	0	0	0	0	0	--	--	--	--	--	--	--	--	--	--	--
HORVU.MOREX.r3.1HG0005880	HORVU.MOREX.r3.1HG0005880	--	0	0	0	0	0	0	0	0	0	0	0	0	0	0	0	0	0	0	0	0	0	0	0	0	0	0	0	0	0	0	0	0	0	0	0	0	--	--	--	--	--	--	--	--	--	--	--
HORVU.MOREX.r3.1HG0005890	HORVU.MOREX.r3.1HG0005890	--	0	0	0	0	0	0	0	0	0	0	0	0	0	0	0	0	0	0	0	0	0	0	0	0	0	0	0	0	0	0	0	0	0	0	0	0	--	--	--	--	--	--	--	--	--	--	--
HORVU.MOREX.r3.1HG0005900	HORVU.MOREX.r3.1HG0005900	--	0	0	0	0	0	0	0	0	0	0	0	0	0	0	0	0	0	0	0	0	0	0	0	0	0	0	0	0	0	0	0	0	0	0	0	0	--	--	--	--	--	--	--	--	--	--	--
HORVU.MOREX.r3.1HG0005910	HORVU.MOREX.r3.1HG0005910	--	0	0	0	0	0	0	0	0	0	0	0	0	0	0	0	0	0	0	0	0	0	0	0	0	0	0	0	0	0	0	0	0	0	0	0	0	--	--	--	--	--	--	--	--	--	--	--
HORVU.MOREX.r3.1HG0005920	HORVU.MOREX.r3.1HG0005920	--	0	0	0	0	0	0	0	0	0	0	0	0	0	0	0	0	0	0	0	0	0	0	0	0	0	0	0	0	0	0	0	0	0	0	0	0	--	--	--	--	--	--	--	--	--	--	--
HORVU.MOREX.r3.1HG0005930	HORVU.MOREX.r3.1HG0005930	--	0	0	0	0	0	0	0	0	0	0	0	0	0	0	0	0	0	0	0	0	0	0	0	0	0	0	0	0	0	0	0	0	0	0	0	0	--	--	--	--	--	--	--	--	--	--	--
HORVU.MOREX.r3.1HG0005940	HORVU.MOREX.r3.1HG0005940	--	0	0	0	0	0	0	0	0	0	0	0	0	0	0	0	0	0	0	0	0	0	0	0	0	0	0	0	0	0	0	0	0	0	0	0	0	--	--	--	--	--	--	--	--	--	--	--
HORVU.MOREX.r3.1HG0005950	HORVU.MOREX.r3.1HG0005950	--	0	0	0	0	0	0	0	0	0	0	0	0	0	0	0	0	0	0	0	0	0	0	0	0	0	0	0	0	0	0	0	0	0	0	0	0	--	--	--	--	--	--	--	--	--	--	--
HORVU.MOREX.r3.1HG0005960	HORVU.MOREX.r3.1HG0005960	--	0	0	0	0	0	0	0	0	0	0	0	0	0	0	0	0	0	0	0	0	0	0	0	0	0	0	0	0	0	0	0	0	0	0	0	0	--	--	--	--	--	--	--	--	--	--	--
HORVU.MOREX.r3.1HG0005970	HORVU.MOREX.r3.1HG0005970	--	0	0	0	0	0	0	0	0	0	0	0	0	0	0	0	0	0	0	0	0	0	0	0	0	0	0	0	0	0	0	0	0	0	0	0	0	--	--	--	--	--	--	--	--	--	--	--
HORVU.MOREX.r3.1HG0005980	HORVU.MOREX.r3.1HG0005980	--	0	0	0	0	0	0	0	0	0	0	0	0	0	0	0	0	0	0	0	0	0	0	0	0	0	0	0	0	0	0	0	0	0	0	0	0	--	--	--	--	--	--	--	--	--	--	--
HORVU.MOREX.r3.1HG0005990	HORVU.MOREX.r3.1HG0005990	--	0	0	0	0	0	0	0	0	0	0	0	0	0	0	0	0	0	0	0	0	0	0	0	0	0	0	0	0	0	0	0	0	0	0	0	0	--	--	--	--	--	--	--	--	--	--	--
HORVU.MOREX.r3.1HG0006000	HORVU.MOREX.r3.1HG0006000	--	0	0	0	0	0	0	0	0	0	0	0	0	0	0	0	0	0	0	0	0	0	0	0	0	0	0	0	0	0	0	0	0	0	0	0	0	--	--	--	--	--	--	--	--	--	--	--
HORVU.MOREX.r3.1HG0006010	HORVU.MOREX.r3.1HG0006010	--	0	0	0	0	0	0	0	0	0	0	0	0	0	0	0	0	0	0	0	0	0	0	0	0	0	0	0	0	0	0	0	0	0	0	0	0	--	--	--	--	--	--	--	--	--	--	--
HORVU.MOREX.r3.1HG0006020	HORVU.MOREX.r3.1HG0006020	--	0	0	0	0	0	0	0	0	0	0	0	0	0	0	0	0	0	0	0	0	0	0	0	0	0	0	0	0	0	0	0	0	0	0	0	0	--	--	--	--	--	--	--	--	--	--	--
HORVU.MOREX.r3.1HG0006030	HORVU.MOREX.r3.1HG0006030	--	0	0	0	0	0	0	0	0	0	0	0	0	0	0	0	0	0	0	0	0	0	0	0	0	0	0	0	0	0	0	0	0	0	0	0	0	--	--	--	--	--	--	--	--	--	--	--
HORVU.MOREX.r3.1HG0006040	HORVU.MOREX.r3.1HG0006040	--	0	0	0	0	0	0	0	0	0	0	0	0	0	0	0	0	0	0	0	0	0	0	0	0	0	0	0	0	0	0	0	0	0	0	0	0	--	--	--	--	--	--	--	--	--	--	--
HORVU.MOREX.r3.1HG0006050	HORVU.MOREX.r3.1HG0006050	--	0	0	0	0	0	0	0	0	0	0	0	0	0	0	0	0	0	0	0	0	0	0	0	0	0	0	0	0	0	0	0	0	0	0	0	0	--	--	--	--	--	--	--	--	--	--	--
HORVU.MOREX.r3.1HG0006060	HORVU.MOREX.r3.1HG0006060	--	0	0	0	0	0	0	0	0	0	0	0	0	0	0	0	0	0	0	0	0	0	0	0	0	0	0	0	0	0	0	0	0	0	0	0	0	--	--	--	--	--	--	--	--	--	--	--
HORVU.MOREX.r3.1HG0006070	HORVU.MOREX.r3.1HG0006070	--	0.60061	15	0.723514	18	1.26636	32	0	0	0	0	0	0	0	0	0	0	0	0	0.16892	4	0.345304	9	0.910297	21	0	0	0	0	0	0	0	0	0	0	0	0	--	--	--	--	--	--	--	--	--	--	--
HORVU.MOREX.r3.1HG0006080	HORVU.MOREX.r3.1HG0006080	--	0	0	0	0	0	0	0	0	0	0	0	0	0	0	0	0	0	0	0	0	0	0	0	0	0	0	0	0	0	0	0	0	0	0	0	0	--	--	--	--	--	--	--	--	--	--	--
HORVU.MOREX.r3.1HG0006090	HORVU.MOREX.r3.1HG0006090	LOC109742914	0	0	0	0	0	0	0	0	0	0	0	0	0	0	0	0	0	0	0	0	0	0	0	0	0	0	0	0	0	0	0	0	0	0	0	0	--	--	--	--	--	--	--	--	--	--	--
HORVU.MOREX.r3.1HG0006100	HORVU.MOREX.r3.1HG0006100	--	0	0	0	0	0	0	0	0	0	0	0	0	0	0	0	0	0	0	0	0	0	0	0	0	0	0	0	0	0	0	0	0	0	0	0	0	--	--	--	--	--	--	--	--	--	--	--
HORVU.MOREX.r3.1HG0006110	HORVU.MOREX.r3.1HG0006110	--	0	0	0	0	0	0	0	0	0	0	0	0	0	0	0	0	0	0	0	0	0	0	0	0	0	0	0	0	0	0	0	0	0	0	0	0	--	--	--	--	--	--	--	--	--	--	--
HORVU.MOREX.r3.1HG0006120	HORVU.MOREX.r3.1HG0006120	--	0	0	0	0	0	0	0	0	0	0	0	0	0	0	0	0	0	0	0	0	0	0	0	0	0	0	0	0	0	0	0	0	0	0	0	0	--	--	--	--	--	--	--	--	--	--	--
HORVU.MOREX.r3.1HG0006130	HORVU.MOREX.r3.1HG0006130	--	11.6731	182	8.93873	136	7.7104	121	335.513	4869	332.217	4862	332.132	5211	0	0	0	0	0	0	0	0	0	0	0.604459	9	0	0	0	0	0	0	0	0	0	0	0	0	0	5.29131	up	2.47071e-32	5.81915	up	--	--	--	9.70551e-05	3.59436
HORVU.MOREX.r3.1HG0006140	HORVU.MOREX.r3.1HG0006140	--	0	0	0	0	0	0	0	0	0	0	0	0	0	0	0	0	0	0	0	0	0	0	0	0	0	0	0	0	0	0	0	0	0	0	0.056835	1	--	--	--	--	--	--	--	--	--	--	--
HORVU.MOREX.r3.1HG0006150	HORVU.MOREX.r3.1HG0006150	LOC109784067	0	0	0	0	0.468062	6	0	0	0.244453	3	0.174255	2	0.819739	11	0.188913	2	0	0	0.229461	3	0.384627	5	0.617021	7	0.731528	9	0	0	0	0	0.983848	11	0.246201	3	0.626473	7	--	--	--	--	--	--	--	--	--	--	--
HORVU.MOREX.r3.1HG0006160	HORVU.MOREX.r3.1HG0006160	--	0	0	0	0	0	0	0.027969	3	0.094301	10	0	0	0	0	0	0	0	0	0	0	0.067484	8	0	0	0.059706	7	0	0	0	0	0.074656	9	0.093527	10	0.077142	8	--	--	--	--	--	--	--	--	--	--	--
HORVU.MOREX.r3.1HG0006210	HORVU.MOREX.r3.1HG0006210	--	8.06758	674	7.8855	643	8.3084	695	2.3402	183	3.11353	245	2.92493	246	8.81521	823	6.73744	525	8.45499	779	4.42928	347	5.09207	408	3.9046	303	0.561818	49	0.94067	74	1.05651	81	0.853215	69	0.305537	24	0.797818	62	3.54862e-21	-1.31741	down	0.877912	-0.0228562	normal	6.03955e-09	-0.810285	normal	0.00525303	-0.511926
HORVU.MOREX.r3.1HG0006220	HORVU.MOREX.r3.1HG0006220	--	0	0	0	0	0	0	0	0	0	0	0	0	0	0	0	0	0	0	0	0	0	0	0	0	0	0	0	0	0	0	0	0	0	0	0	0	--	--	--	--	--	--	--	--	--	--	--
HORVU.MOREX.r3.1HG0006230	HORVU.MOREX.r3.1HG0006230	--	0	0	0	0	0.073785	8	0	0	0	0	0	0	0	0	0	0	0	0	0	0	0.019849	2	0	0	0.046834	6	0.029784	3	0.257443	25	0.09157	10	0.150108	15	0.1161	12	--	--	--	--	--	--	--	--	--	--	--
HORVU.MOREX.r3.1HG0006240	HORVU.MOREX.r3.1HG0006240	--	3.18572	47	4.76806	68	2.44357	36	4.32145	59	4.31428	60	6.04113	89	4.75087	78	5.37772	74	6.29257	102	5.10211	70	5.0725	71	5.92728	81	8.50449	128	8.37788	114	8.30928	111	11.2139	157	11.1299	152	11.1665	150	0.0745798	0.638003	normal	0.0574232	-0.650316	normal	0.935809	-0.0306779	normal	0.936504	0.0309896
HORVU.MOREX.r3.1HG0006250	HORVU.MOREX.r3.1HG0006250	--	0	0	0	0	0	0	0	0	0	0	0	0	0	0	0	0	0	0	0	0	0	0	0	0	0	0	0	0	0	0	0	0	0	0	0	0	--	--	--	--	--	--	--	--	--	--	--
HORVU.MOREX.r3.1HG0006260	HORVU.MOREX.r3.1HG0006260	--	0	0	0	0	0	0	0	0	0	0	0	0	0	0	0	0	0	0	0	0	0	0	0	0	0	0	0	0	0	0	0	0	0	0	0	0	--	--	--	--	--	--	--	--	--	--	--
HORVU.MOREX.r3.1HG0006270	HORVU.MOREX.r3.1HG0006270	--	0	0	0	0	0	0	0	0	0	0	0	0	0	0	0	0	0	0	0	0	0	0	0	0	0	0	0	0	0	0	0	0	0	0	0	0	--	--	--	--	--	--	--	--	--	--	--
HORVU.MOREX.r3.1HG0006280	HORVU.MOREX.r3.1HG0006280	--	0	0	0	0	0	0	0	0	0	0	0	0	0	0	0	0	0	0	0	0	0	0	0	0	0	0	0	0	0	0	0	0	0	0	0	0	--	--	--	--	--	--	--	--	--	--	--
HORVU.MOREX.r3.1HG0006290	HORVU.MOREX.r3.1HG0006290	--	0	0	0	0	0	0	0	0	0	0	0	0	0	0	0	0	0	0	0	0	0	0	0	0	0.18689	4	0	0	0	0	0.356306	7	0.240013	5	0	0	--	--	--	--	--	--	--	--	--	--	--
HORVU.MOREX.r3.1HG0006300	HORVU.MOREX.r3.1HG0006300	--	0	0	0	0	0	0	0	0	0	0	0	0	0	0	0	0	0	0	0	0	0	0	0	0	0.431313	29	0.179378	11	0.191546	12	0.247194	16	0.244861	15	0.247832	15	--	--	--	--	--	--	--	--	--	--	--
HORVU.MOREX.r3.1HG0006310	HORVU.MOREX.r3.1HG0006310	--	0.687014	9	0.395273	5	1.22176	15	0	0	0.090734	2	0	0	0.565769	8	0.583911	7	0	0	0.076683	1	0	0	2.65832	31	0.042178	1	0	0	0	0	0.100716	2	0	0	0.09826	2	--	--	--	--	--	--	--	--	--	--	--
HORVU.MOREX.r3.1HG0006320	HORVU.MOREX.r3.1HG0006320	--	0	0	0	0	0	0	0	0	0	0	0	0	0	0	0	0	0	0	0	0	0	0	0	0	0	0	0	0	0	0	0	0	0	0	0	0	--	--	--	--	--	--	--	--	--	--	--
HORVU.MOREX.r3.1HG0006330	HORVU.MOREX.r3.1HG0006330	--	2.96502	34	2.74493	31	1.39179	16	0.982358	11	1.11634	12	1.3418	16	1.3933	18	0.843449	9	2.26614	29	1.8215	20	2.01051	23	1.70395	19	2.97566	35	2.31922	25	2.52732	27	1.71841	19	2.80917	31	1.48545	16	--	--	--	--	--	--	--	--	--	--	--
HORVU.MOREX.r3.1HG0006340	HORVU.MOREX.r3.1HG0006340	--	23.644	1287	24.3922	1296	23.0466	1256	35.33	1790	37.2607	1904	36.101	1978	32.908	2000	30.6197	1553	33.4917	2009	43.5394	2217	37.4301	1951	46.2648	2338	31.6086	1763	33.3429	1689	30.8349	1533	29.6168	1548	29.6344	1508	27.7356	1390	7.11767e-26	0.802933	normal	7.90833e-11	-0.48322	normal	3.89765e-06	0.385684	normal	0.528853	-0.0642169
HORVU.MOREX.r3.1HG0006350	HORVU.MOREX.r3.1HG0006350	--	0	0	0	0	0	0	0	0	0	0	0	0	0	0	0	0	0	0	0	0	0	0	0	0	0	0	0	0	0	0	0	0	0	0	0	0	--	--	--	--	--	--	--	--	--	--	--
HORVU.MOREX.r3.1HG0006360	HORVU.MOREX.r3.1HG0006360	--	0	0	0	0	0	0	0	0	0.113759	2	0	0	0	0	0	0	0	0	0	0	0	0	0	0	0	0	0	0	0	0	0	0	0	0	0	0	--	--	--	--	--	--	--	--	--	--	--
HORVU.MOREX.r3.1HG0006370	HORVU.MOREX.r3.1HG0006370	--	0	0	0	0	0.027518	1	0.04041	1	0.31808	6	0.050059	2	0	0	0	0	0	0	0	0	0	0	0	0	0	0	0	0	0	0	0	0	0	0	0	0	--	--	--	--	--	--	--	--	--	--	--
HORVU.MOREX.r3.1HG0006380	HORVU.MOREX.r3.1HG0006380	--	0	0	0	0	0	0	0	0	0	0	0	0	0	0	0	0	0	0	0	0	0	0	0	0	0	0	0	0	0	0	0	0	0	0	0	0	--	--	--	--	--	--	--	--	--	--	--
HORVU.MOREX.r3.1HG0006390	HORVU.MOREX.r3.1HG0006390	--	0	0	0	0	0	0	0	0	0	0	0	0	0	0	0	0	0	0	0	0	0	0	0	0	0	0	0	0	0	0	0	0	0	0	0	0	--	--	--	--	--	--	--	--	--	--	--
HORVU.MOREX.r3.1HG0006400	HORVU.MOREX.r3.1HG0006400	--	5.12457	455	5.26283	456	5.10996	454	4.72768	391	5.38628	449	5.4939	491	3.00443	298	3.8487	319	2.56415	251	4.4512	370	4.09518	348	3.91415	323	2.40944	220	2.74702	227	2.60314	211	3.12467	267	3.83637	319	4.03926	330	0.150166	0.202333	normal	2.52744e-05	0.673367	normal	0.0317751	0.387493	normal	0.000755662	0.483883
HORVU.MOREX.r3.1HG0006410	HORVU.MOREX.r3.1HG0006410	--	0	0	0	0	0	0	0	0	0	0	0	0	0	0	0	0	0	0	0	0	0	0	0	0	0	0	0	0	0	0	0	0	0	0	0	0	--	--	--	--	--	--	--	--	--	--	--
HORVU.MOREX.r3.1HG0006420	HORVU.MOREX.r3.1HG0006420	LOC109756714	2.1664	226	2.15986	220	2.02511	212	1.04549	102	0.920255	91	1.31363	138	1.28784	150	1.39811	136	1.40473	162	2.54742	249	1.53635	154	1.89089	184	3.47023	371	3.20837	312	2.46202	235	3.66945	368	3.99411	390	3.89919	375	0.000704547	-0.729868	normal	0.00234572	0.584489	normal	0.027898	0.505499	normal	0.0074235	-0.687492
HORVU.MOREX.r3.1HG0006430	HORVU.MOREX.r3.1HG0006430	--	0.506789	48	0.495855	46	0.340302	33	0.454507	40	0.546086	49	0.457048	44	0.903167	95	1.07941	95	0.44487	47	0.49022	44	0.717702	65	0.671192	59	1.07765	104	0.608277	54	0.641041	56	1.21344	110	1.06754	94	0.878986	77	0.495458	0.28104	normal	0.0350403	-0.792165	normal	0.447726	-0.291225	normal	0.649895	-0.191906
HORVU.MOREX.r3.1HG0006440	HORVU.MOREX.r3.1HG0006440	--	0.946399	33	0.716784	25	1.08094	38	1.28949	42	1.71443	56	0.761957	27	1.94819	76	0.49379	16	1.00408	39	0.773894	26	0.871634	29	1.08015	35	4.85698	172	4.56704	147	4.39309	139	2.58259	86	2.12294	69	2.44877	78	0.204939	0.557466	normal	--	--	--	--	--	--	0.223462	0.584187
HORVU.MOREX.r3.1HG0006450	HORVU.MOREX.r3.1HG0006450	--	0	0	0	0	0	0	0	0	0	0	0	0	0	0	0	0	0	0	0	0	0	0	0	0	0.425534	11	0.827676	20	1.12597	26	1.40072	34	1.09415	26	1.83118	43	--	--	--	--	--	--	--	--	--	--	--
HORVU.MOREX.r3.1HG0006460	HORVU.MOREX.r3.1HG0006460	--	0	0	0.053127	3	0.051801	3	0.218321	8	0.108618	4	0.205713	8	0.162527	8	0.27551	10	0.18739	8	0.165004	6	0.169656	7	0.223394	9	28.4865	1127	33.6473	1208	30.0055	1057	44.5798	1651	44.1231	1591	46.9832	1669	--	--	--	--	--	--	--	--	--	--	--
HORVU.MOREX.r3.1HG0006470	HORVU.MOREX.r3.1HG0006470	--	2.17386	26	3.28317	38	3.09616	37	8.46242	92	9.33565	103	5.37247	64	9.24605	121	11.2486	123	7.70401	100	9.31313	102	7.99248	90	6.5542	71	14.8058	177	13.2914	145	12.3467	132	17.0948	192	16.4483	180	19.6114	211	1.17234e-05	1.47607	up	1.7346e-07	-1.6132	down	0.50049	-0.212987	normal	0.741535	0.12048
HORVU.MOREX.r3.1HG0006480	HORVU.MOREX.r3.1HG0006480	--	2.3608	252	2.53767	264	3.19508	341	0.735676	73	1.00245	101	0.824068	89	3.67635	437	4.41224	438	3.35035	394	2.62798	262	1.89426	194	2.38529	236	3.45504	377	3.03015	301	3.9561	385	2.72264	279	2.4169	241	2.89373	284	3.70231e-11	-1.41224	down	0.00220115	-0.520572	normal	4.41476e-05	-0.689774	normal	7.37923e-08	-1.24197
HORVU.MOREX.r3.1HG0006490	HORVU.MOREX.r3.1HG0006490	--	10.3063	279	11.4134	302	10.3775	282	1.93467	49	2.55068	65	2.52571	69	1.77127	54	1.09326	28	1.06955	32	2.50554	64	1.29842	34	1.51837	39	1.29084	36	1.4939	38	1.84658	46	1.38354	36	1.36313	35	2.76395	69	3.24808e-20	-1.9316	down	9.21114e-35	2.85461	up	0.428018	0.331732	normal	0.1941	0.523451
HORVU.MOREX.r3.1HG0006500	HORVU.MOREX.r3.1HG0006500	--	0	0	0	0	0	0	0	0	0	0	0	0	0	0	0	0	0	0	0	0	0	0	0	0	0	0	0	0	0	0	0	0	0	0	0	0	--	--	--	--	--	--	--	--	--	--	--
HORVU.MOREX.r3.1HG0006520	HORVU.MOREX.r3.1HG0006520	--	0	0	0	0	0	0	0	0	0	0	0	0	0	0	0	0	0	0	0	0	0	0	0	0	0	0	0	0	0	0	0	0	0	0	0	0	--	--	--	--	--	--	--	--	--	--	--
HORVU.MOREX.r3.1HG0006530	HORVU.MOREX.r3.1HG0006530	--	0	0	0	0	0	0	0	0	0	0	0	0	0	0	0	0	0	0	0	0	0	0	0	0	0	0	0	0	0	0	0	0	0	0	0	0	--	--	--	--	--	--	--	--	--	--	--
HORVU.MOREX.r3.1HG0006560	HORVU.MOREX.r3.1HG0006560	--	3.42699	88	3.22308	81	4.29885	111	2.10523	51	1.67352	41	3.22239	83	2.20905	64	2.4465	59	2.09006	59	2.28797	55	1.77683	44	2.88768	69	2.34006	62	2.38142	57	2.07252	49	2.39186	59	1.78353	43	2.14235	51	0.226112	-0.413801	normal	0.0386114	0.623836	normal	0.937582	0.0335387	normal	0.693751	0.170871
HORVU.MOREX.r3.1HG0006570	HORVU.MOREX.r3.1HG0006570	LOC109758781	91.7966	3153	88.3434	2962	86.7066	2982	70.514	2255	63.0534	2034	62.9451	2177	107.081	4107	109.544	3506	105.128	3981	84.9869	2731	80.2987	2642	80.5775	2570	113.265	3988	102.93	3290	108.836	3414	92.9439	3065	93.6392	3006	89.7583	2839	0.00179237	-0.246247	normal	3.00971e-08	-0.304625	normal	3.08551e-12	-0.385845	normal	0.0544182	-0.159823
HORVU.MOREX.r3.1HG0006580	HORVU.MOREX.r3.1HG0006580	--	49.7258	2751	51.2777	2780	45.3139	2537	35.0176	1822	31.8334	1702	31.6715	1782	53.8766	3395	49.9292	2611	49.1102	3047	54.5326	2842	58.9512	3148	54.6854	2882	62.3642	3605	65.9641	3446	61.4932	3164	79.7074	4256	76.8058	3976	76.0896	3903	8.43838e-06	-0.358102	normal	0.0943171	-0.117496	normal	0.0565561	0.130362	normal	3.27297e-15	-0.603337
HORVU.MOREX.r3.1HG0006590	HORVU.MOREX.r3.1HG0006590	--	0	0	0	0	0	0	0	0	0	0	0	0	0	0	0	0	0	0	0	0	0	0	0	0	0	0	0	0	0	0	0	0	0	0	0	0	--	--	--	--	--	--	--	--	--	--	--
HORVU.MOREX.r3.1HG0006600	HORVU.MOREX.r3.1HG0006600	--	0	0	0	0	0	0	0	0	0	0	0	0	0	0	0	0	0	0	0	0	0	0	0	0	0	0	0	0	0	0	0	0	0	0	0	0	--	--	--	--	--	--	--	--	--	--	--
HORVU.MOREX.r3.1HG0006610	HORVU.MOREX.r3.1HG0006610	LOC109758793	200.009	5801	191.049	5409	200.425	5819	174.975	4725	179.793	4896	162.461	4743	215.708	6986	188.971	5106	179.461	5737	213.625	5796	225.372	6260	218.933	5896	113.483	3374	126.207	3406	122.291	3239	91.6752	2553	94.9871	2575	94.9901	2537	0.998784	0.000146025	normal	0.831306	-0.0169657	normal	0.00988608	0.170453	normal	0.00668289	-0.18395
HORVU.MOREX.r3.1HG0006620	HORVU.MOREX.r3.1HG0006620	--	9.77479	346	10.9363	377	11.0156	390	11.7179	386	11.0899	368	13.0089	463	13.5685	536	12.0843	398	12.7458	497	13.0059	430	11.7959	399	12.8814	423	11.8721	430	11.9232	392	10.9852	355	13.9192	472	11.7364	388	11.895	387	0.0128594	0.364228	normal	0.0256781	-0.308448	normal	0.876325	-0.0285688	normal	0.575949	0.0896879
HORVU.MOREX.r3.1HG0006630	HORVU.MOREX.r3.1HG0006630	--	0.455888	4	0.067687	1	0.264819	3	0	0	0	0	0	0	0	0	0	0	0	0	0	0	0	0	0	0	0	0	0	0	0	0	0	0	0	0	0	0	--	--	--	--	--	--	--	--	--	--	--
HORVU.MOREX.r3.1HG0006640	HORVU.MOREX.r3.1HG0006640	--	0	0	0	0	0	0	0	0	0	0	0	0	0	0	0	0	0	0	0	0	0	0	0	0	0	0	0	0	0	0	0	0	0	0	0	0	--	--	--	--	--	--	--	--	--	--	--
HORVU.MOREX.r3.1HG0006650	HORVU.MOREX.r3.1HG0006650	LOC109758793	244.332	8784	223.13	7831	248.021	8927	147.866	4950	145.276	4905	135.228	4895	173.048	6948	163.094	5464	148.469	5884	182.011	6122	199.911	6884	188.488	6293	97.5766	3596	105.639	3535	91.7162	3012	74.8854	2585	71.9677	2419	80.8047	2675	8.79226e-16	-0.544493	normal	9.80894e-18	0.52591	normal	9.81928e-05	0.233831	normal	0.00026474	-0.249737
HORVU.MOREX.r3.1HG0006660	HORVU.MOREX.r3.1HG0006660	--	5.99938	250	5.48269	223	4.30683	180	9.34949	363	10.2999	403	10.6377	447	14.4147	671	14.4113	560	15.3253	704	9.7495	381	10.9757	439	9.16224	355	75.9393	3244	78.3431	3038	80.8604	3077	58.0388	2322	59.7478	2328	62.6018	2402	5.74586e-12	1.11328	up	2.49575e-26	-1.49837	down	8.64164e-06	-0.54673	normal	0.257182	0.178248
HORVU.MOREX.r3.1HG0006680	HORVU.MOREX.r3.1HG0006680	--	0	0	0	0	0	0	0	0	0	0	0	0	0	0	0	0	0	0	0	0	0	0	0	0	0	0	0	0	0	0	0	0	0	0	0	0	--	--	--	--	--	--	--	--	--	--	--
HORVU.MOREX.r3.1HG0006690	HORVU.MOREX.r3.1HG0006690	--	19.5375	2262	19.0947	2158	21.6636	2511	13.4255	1447	14.5697	1584	15.5619	1814	18.0455	2333	19.178	2069	16.3583	2088	14.0911	1526	14.5997	1619	16.0113	1721	14.8177	1758	14.3084	1542	15.1334	1600	13.3248	1481	14.1718	1534	13.384	1427	0.00212585	-0.27435	normal	0.113126	0.135576	normal	0.00171621	-0.258518	normal	0.191202	0.124836
HORVU.MOREX.r3.1HG0006710	HORVU.MOREX.r3.1HG0006710	--	0	0	0	0	0	0	0	0	0	0	0	0	0	0	0	0	0	0	0	0	0	0	0	0	0	0	0	0	0	0	0	0	0	0	0	0	--	--	--	--	--	--	--	--	--	--	--
HORVU.MOREX.r3.1HG0006720	HORVU.MOREX.r3.1HG0006720	--	0	0	0	0	0	0	0	0	0	0	0	0	0	0	0	0	0	0	0	0	0	0	0	0	0	0	0	0	0	0	0	0	0	0	0	0	--	--	--	--	--	--	--	--	--	--	--
HORVU.MOREX.r3.1HG0006730	HORVU.MOREX.r3.1HG0006730	LOC8061972	0	0	0	0	0	0	0	0	0	0	0	0	0	0	0	0	0	0	0	0	0	0	0	0	0	0	0	0	0	0	0	0	0	0	0	0	--	--	--	--	--	--	--	--	--	--	--
HORVU.MOREX.r3.1HG0006740	HORVU.MOREX.r3.1HG0006740	--	0	0	0	0	0	0	0	0	0	0	0	0	0	0	0	0	0	0	0	0	0	0	0	0	0	0	0	0	0	0	0	0	0	0	0	0	--	--	--	--	--	--	--	--	--	--	--
HORVU.MOREX.r3.1HG0006750	HORVU.MOREX.r3.1HG0006750	--	0	0	0	0	0	0	0	0	0	0	0	0	0	0	0	0	0	0	0	0	0	0	0	0	0	0	0	0	0	0	0	0	0	0	0	0	--	--	--	--	--	--	--	--	--	--	--
HORVU.MOREX.r3.1HG0006760	HORVU.MOREX.r3.1HG0006760	LOC109741336	0.23966	7	0.05621	2	0.218872	7	0.026837	1	0.110889	4	0.112967	4	0.140369	5	0.114316	4	0.169555	6	0.35501	10	0.072636	3	0.205425	6	0.289406	9	0.203305	6	0.241623	7	0.420216	12	0.255032	7	0.192247	6	--	--	--	--	--	--	--	--	--	--	--
HORVU.MOREX.r3.1HG0006770	HORVU.MOREX.r3.1HG0006770	--	0	0	0	0	0	0	0	0	0	0	0	0	0	0	0	0	0	0	0	0	0	0	0	0	0	0	0	0	0	0	0	0	0	0	0	0	--	--	--	--	--	--	--	--	--	--	--
HORVU.MOREX.r3.1HG0006780	HORVU.MOREX.r3.1HG0006780	LOC8061972	0	0	0	0	0	0	0	0	0	0	0	0	0	0	0	0	0	0	0	0	0	0	0	0	0	0	0	0	0	0	0	0	0	0	0	0	--	--	--	--	--	--	--	--	--	--	--
HORVU.MOREX.r3.1HG0006790	HORVU.MOREX.r3.1HG0006790	LOC109741336	0.108624	4	0.072044	3	0.276193	8	0	0	0.036963	2	0.016778	1	0.061223	2	0.055792	2	0.070944	3	0.088345	3	0.036721	2	0.058408	2	0.08625	3	0.09813	3	0.190951	6	0.094871	3	0.256023	7	0.103453	3	--	--	--	--	--	--	--	--	--	--	--
HORVU.MOREX.r3.1HG0006800	HORVU.MOREX.r3.1HG0006800	--	0	0	0	0	0	0	0	0	0	0	0	0	0	0	0	0	0	0	0	0	0.064648	1	0	0	0	0	0	0	0	0	0	0	0	0	0	0	--	--	--	--	--	--	--	--	--	--	--
HORVU.MOREX.r3.1HG0006810	HORVU.MOREX.r3.1HG0006810	--	0.026656	1	0.038462	1	0.052815	2	0.016831	1	0.03702	1	0	0	0.031738	1	0.010689	1	0.11639	3	0	0	0.087625	2	0.094797	3	0	0	0.109859	3	0.059822	2	0	0	0	0	0.054722	2	--	--	--	--	--	--	--	--	--	--	--
HORVU.MOREX.r3.1HG0006820	HORVU.MOREX.r3.1HG0006820	--	3.54009	52	7.59649	108	3.83521	56	3.27977	45	3.01757	41	4.95474	73	5.03432	82	5.13221	70	6.59633	106	6.0019	82	6.00173	84	5.59878	76	7.62928	114	7.20914	98	7.29786	97	6.56446	92	5.94523	81	6.38945	86	0.651951	-0.191597	normal	0.6221	-0.188596	normal	0.867861	0.0614431	normal	0.18816	-0.466279
HORVU.MOREX.r3.1HG0006830	HORVU.MOREX.r3.1HG0006830	--	0	0	0	0	0	0	0	0	0	0	0	0	0	0	0	0	0	0	0	0	0	0	0	0	0	0	0	0	0	0	0	0	0	0	0	0	--	--	--	--	--	--	--	--	--	--	--
HORVU.MOREX.r3.1HG0006840	HORVU.MOREX.r3.1HG0006840	--	21.0616	574	21.843	581	15.8766	434	16.9431	430	15.0527	386	18.0028	494	24.0392	732	23.5505	598	25.8368	776	19.683	502	20.4559	534	19.271	488	30.3496	848	29.2335	742	28.4739	709	25.8266	676	23.6965	604	25.0969	630	0.839377	-0.0374283	normal	0.00823577	-0.353805	normal	0.0101883	-0.299838	normal	0.574851	-0.0853149
HORVU.MOREX.r3.1HG0006850	HORVU.MOREX.r3.1HG0006850	--	12.1834	159	18.0372	229	13.6576	178	12.8144	156	10.8916	134	12.758	168	15.174	221	20.5578	250	19.42	279	15.6725	191	17.2537	215	15.9751	193	21.5524	288	21.7345	264	19.724	235	22.2541	278	15.7372	192	15.8478	190	0.814542	-0.0623056	normal	0.0990269	-0.357828	normal	0.463431	-0.16529	normal	0.255023	-0.250154
HORVU.MOREX.r3.1HG0006860	HORVU.MOREX.r3.1HG0006860	--	0	0	0	0	0	0	0	0	0	0	0	0	0	0	0	0	0	0	0	0	0	0	0	0	0	0	0	0	0	0	0	0	0	0	0	0	--	--	--	--	--	--	--	--	--	--	--
HORVU.MOREX.r3.1HG0006870	HORVU.MOREX.r3.1HG0006870	--	0	0	0	0	0	0	0	0	0	0	0	0	0	0	0	0	0	0	0	0	0	0	0	0	0	0	0	0	0	0	0	0	0	0	0	0	--	--	--	--	--	--	--	--	--	--	--
HORVU.MOREX.r3.1HG0006880	HORVU.MOREX.r3.1HG0006880	LOC109775781	0.101563	8	0.114201	9	0.096121	8	0.038754	3	0.11403	9	0.025243	2	0.094737	9	0.217012	16	0.275325	24	0.162709	12	0.072965	6	0.221128	17	0.271217	22	0.387592	29	0.307577	23	0.393582	30	0.390589	29	0.404253	30	--	--	--	--	--	--	--	--	--	--	--
HORVU.MOREX.r3.1HG0006890	HORVU.MOREX.r3.1HG0006890	--	0	0	0	0	0	0	0	0	0	0	0	0	0	0	0	0	0	0	0	0	0	0	0	0	0	0	0	0	0	0	0	0	0	0	0	0	--	--	--	--	--	--	--	--	--	--	--
HORVU.MOREX.r3.1HG0006910	HORVU.MOREX.r3.1HG0006910	--	0	0	0	0	0	0	0	0	0	0	0	0	0	0	0	0	0	0	0	0	0	0	0	0	0	0	0	0	0	0	0	0	0	0	0	0	--	--	--	--	--	--	--	--	--	--	--
HORVU.MOREX.r3.1HG0006920	HORVU.MOREX.r3.1HG0006920	--	0	0	0	0	0	0	0	0	0	0	0	0	0	0	0	0	0	0	0	0	0	0	0	0	0	0	0	0	0	0	0	0	0	0	0	0	--	--	--	--	--	--	--	--	--	--	--
HORVU.MOREX.r3.1HG0006930	HORVU.MOREX.r3.1HG0006930	--	0	0	0	0	0	0	0	0	0	0	0	0	0	0	0	0	0	0	0	0	0	0	0	0	0	0	0	0	0	0	0	0	0	0	0	0	--	--	--	--	--	--	--	--	--	--	--
HORVU.MOREX.r3.1HG0006950	HORVU.MOREX.r3.1HG0006950	--	0	0	0	0	0	0	0	0	0	0	0	0	0	0	0	0	0.164308	4	0	0	0	0	0	0	0	0	0	0	0	0	0	0	0	0	0	0	--	--	--	--	--	--	--	--	--	--	--
HORVU.MOREX.r3.1HG0006960	HORVU.MOREX.r3.1HG0006960	--	0	0	0	0	0	0	0	0	0	0	0	0	0	0	0	0	0	0	0	0	0	0	0	0	0	0	0	0	0	0	0	0	0	0	0	0	--	--	--	--	--	--	--	--	--	--	--
HORVU.MOREX.r3.1HG0006980	HORVU.MOREX.r3.1HG0006980	--	0	0	0	0	0	0	0	0	0	0	0	0	0	0	0	0	0	0	0	0	0	0	0	0	0	0	0	0	0	0	0	0	0	0	0	0	--	--	--	--	--	--	--	--	--	--	--
HORVU.MOREX.r3.1HG0006990	HORVU.MOREX.r3.1HG0006990	--	0	0	0	0	0	0	0	0	0	0	0	0	0	0	0	0	0	0	0	0	0	0	0	0	0	0	0	0	0	0	0	0	0	0	0	0	--	--	--	--	--	--	--	--	--	--	--
HORVU.MOREX.r3.1HG0007030	HORVU.MOREX.r3.1HG0007030	--	0	0	0	0	0	0	0	0	0	0	0	0	0	0	0	0	0	0	0	0	0	0	0	0	0	0	0	0	0	0	0	0	0	0	0	0	--	--	--	--	--	--	--	--	--	--	--
HORVU.MOREX.r3.1HG0007050	HORVU.MOREX.r3.1HG0007050	--	0	0	0	0	0	0	0	0	0	0	0	0	0	0	0	0	0	0	0	0	0	0	0	0	0	0	0	0	0	0	0	0	0	0	0	0	--	--	--	--	--	--	--	--	--	--	--
HORVU.MOREX.r3.1HG0007090	HORVU.MOREX.r3.1HG0007090	--	0	0	0	0	0	0	0	0	0	0	0	0	0	0	0	0	0	0	0	0	0	0	0	0	0	0	0	0	0	0	0	0	0	0	0	0	--	--	--	--	--	--	--	--	--	--	--
HORVU.MOREX.r3.1HG0007100	HORVU.MOREX.r3.1HG0007100	--	0	0	0	0	0	0	0	0	0	0	0	0	0	0	0	0	0	0	0	0	0	0	0	0	0	0	0	0	0	0	0	0	0	0	0	0	--	--	--	--	--	--	--	--	--	--	--
HORVU.MOREX.r3.1HG0007110	HORVU.MOREX.r3.1HG0007110	--	0	0	0	0	0	0	0	0	0	0	0	0	0	0	0	0	0	0	0	0	0	0	0	0	0	0	0	0	0	0	0	0	0	0	0	0	--	--	--	--	--	--	--	--	--	--	--
HORVU.MOREX.r3.1HG0007130	HORVU.MOREX.r3.1HG0007130	--	0.149908	2	0	0	0	0	0	0	0	0	0	0	0	0	0	0	0	0	0	0	0	0	0	0	0	0	0	0	0	0	0	0	0	0	0	0	--	--	--	--	--	--	--	--	--	--	--
HORVU.MOREX.r3.1HG0007160	HORVU.MOREX.r3.1HG0007160	--	19.6457	1873	19.0866	1776	19.497	1861	17.9054	1589	18.5603	1661	20.8039	1996	16.4628	1753	15.5425	1380	16.7221	1757	14.8976	1329	16.2342	1482	18.2143	1612	15.3364	1499	14.4322	1280	17.4139	1516	18.4625	1690	18.6597	1663	18.3111	1607	0.0554717	0.168559	normal	0.00260403	0.220362	normal	0.891352	0.0168222	normal	8.81621e-05	0.375909
HORVU.MOREX.r3.1HG0007170	HORVU.MOREX.r3.1HG0007170	--	0	0	0	0	0	0	0	0	0	0	0	0	0	0	0	0	0	0	0	0	0	0	0	0	0	0	0	0	0	0	0	0	0	0	0	0	--	--	--	--	--	--	--	--	--	--	--
HORVU.MOREX.r3.1HG0007190	HORVU.MOREX.r3.1HG0007190	--	0	0	0	0	0	0	0	0	0	0	0	0	0	0	0	0	0	0	0	0	0	0	0	0	0	0	0	0	0	0	0	0	0	0	0	0	--	--	--	--	--	--	--	--	--	--	--
HORVU.MOREX.r3.1HG0007200	HORVU.MOREX.r3.1HG0007200	GPI	60.5197	5367	59.3742	5156	62.4521	5567	113.031	9311	110.237	9133	124.336	11067	51.812	5130	53.2035	4440	55.6222	5429	56.8347	4694	57.8839	4895	59.5369	4949	73.642	6731	69.0416	5723	76.1617	6158	87.6812	7459	92.3337	7650	98.1369	7996	1.12415e-72	1.1127	up	0.00787621	0.146794	normal	0.046695	0.112988	normal	4.93409e-83	1.15176
HORVU.MOREX.r3.1HG0007210	HORVU.MOREX.r3.1HG0007210	--	0	0	0.115746	2	0	0	0	0	0	0	0	0	0	0	0	0	0	0	0	0	0	0	0	0	0	0	0	0	0	0	0	0	0	0	0	0	--	--	--	--	--	--	--	--	--	--	--
HORVU.MOREX.r3.1HG0007220	HORVU.MOREX.r3.1HG0007220	--	17.0608	586	16.5076	553	18.6456	641	22.018	704	21.6306	697	18.5069	640	10.8173	415	13.0491	418	11.5091	436	16.3815	526	12.0095	395	13.8353	441	10.3003	363	11.1559	357	7.14384	224	11.1717	368	11.8392	380	12.1331	384	0.000372818	0.440241	normal	5.11845e-05	0.521444	normal	0.139683	0.24611	normal	4.01827e-07	0.717233
HORVU.MOREX.r3.1HG0007230	HORVU.MOREX.r3.1HG0007230	--	9.78096	925	9.29369	858	9.7237	921	6.39043	563	5.48053	487	6.23956	594	7.05372	745	8.10598	714	7.93399	827	6.22736	551	8.75714	793	7.32975	644	5.79591	562	5.92861	522	5.56425	481	5.19653	472	5.70735	505	5.65619	493	2.7437e-05	-0.470892	normal	0.00643949	0.282489	normal	0.7858	-0.0479157	normal	0.38729	-0.137591
HORVU.MOREX.r3.1HG0007240	HORVU.MOREX.r3.1HG0007240	--	0.989694	36	1.25388	45	1.3863	51	1.07633	37	0.845657	29	0.967801	36	0.294148	12	0.577551	20	0.289993	12	0.516683	18	0.366382	13	0.63037	22	1.02951	39	0.528119	18	0.557863	19	0.172221	7	0.265151	9	0.116133	4	0.803008	-0.114932	normal	--	--	--	--	--	--	--	--
HORVU.MOREX.r3.1HG0007250	HORVU.MOREX.r3.1HG0007250	--	0.294944	14	0.065687	4	0.475379	23	0.183172	8	0.167075	8	0	0	0.109981	6	0.045878	3	0.151618	8	0.226936	10	0.095362	5	0.881566	39	0.041563	2	0.309143	14	0.139798	6	0.162358	8	0.55747	25	0.138197	6	--	--	--	--	--	--	--	--	--	--	--
HORVU.MOREX.r3.1HG0007260	HORVU.MOREX.r3.1HG0007260	--	0	0	0	0	0	0	0	0	0	0	0	0	0	0	0	0	0	0	0	0	0	0	0	0	0	0	0	0	0	0	0	0	0	0	0	0	--	--	--	--	--	--	--	--	--	--	--
HORVU.MOREX.r3.1HG0007270	HORVU.MOREX.r3.1HG0007270	--	0.101371	2	0	0	0	0	0	0	0	0	0	0	0	0	0	0	0	0	0	0	0	0	0	0	0	0	0	0	0	0	0	0	0	0	0	0	--	--	--	--	--	--	--	--	--	--	--
HORVU.MOREX.r3.1HG0007280	HORVU.MOREX.r3.1HG0007280	--	0.106314	6	0.079115	4	0.107998	6	0	0	0	0	0	0	0	0	0	0	0	0	0	0	0	0	0	0	0	0	0	0	0	0	0	0	0	0	0	0	--	--	--	--	--	--	--	--	--	--	--
HORVU.MOREX.r3.1HG0007290	HORVU.MOREX.r3.1HG0007290	--	24.1027	1298	25.71	1350	24.0907	1299	13.1665	661	13.4871	682	11.2341	610	11.5687	696	12.0777	606	11.3133	672	10.6496	537	12.3066	635	11.0449	553	7.48334	414	7.89624	396	7.47386	368	8.09704	419	7.76924	392	7.07258	351	1.02155e-13	-0.762625	normal	3.82098e-33	1.03837	up	0.806252	-0.0381174	normal	0.0159632	0.317418
HORVU.MOREX.r3.1HG0007300	HORVU.MOREX.r3.1HG0007300	--	0	0	0	0	0.140312	3	0	0	0	0	0	0	0	0	0	0	1.03129	17	0.140638	2	0.12124	2	0.163376	3	0	0	0	0	0.082546	2	0	0	0.266494	4	0	0	--	--	--	--	--	--	--	--	--	--	--
HORVU.MOREX.r3.1HG0007320	HORVU.MOREX.r3.1HG0007320	--	0	0	0	0	0	0	0	0	0	0	0	0	0	0	0	0	0	0	0	0	0	0	0	0	0	0	0	0	0	0	0	0	0	0	0	0	--	--	--	--	--	--	--	--	--	--	--
HORVU.MOREX.r3.1HG0007330	HORVU.MOREX.r3.1HG0007330	--	0	0	0	0	0	0	0	0	0	0	0	0	0	0	0	0	0	0	0	0	0	0	0	0	0	0	0	0	0	0	0	0	0	0	0	0	--	--	--	--	--	--	--	--	--	--	--
HORVU.MOREX.r3.1HG0007340	HORVU.MOREX.r3.1HG0007340	--	0	0	0	0	0	0	0	0	0.073073	1	0	0	0	0	0	0	0	0	0	0	0	0	0	0	0	0	0	0	0	0	0	0	0	0	0	0	--	--	--	--	--	--	--	--	--	--	--
HORVU.MOREX.r3.1HG0007350	HORVU.MOREX.r3.1HG0007350	--	0	0	0	0	0	0	0	0	0	0	0	0	0	0	0	0	0	0	0	0	0	0	0.179684	2	0	0	0	0	0	0	0	0	0.071647	1	0	0	--	--	--	--	--	--	--	--	--	--	--
HORVU.MOREX.r3.1HG0007360	HORVU.MOREX.r3.1HG0007360	--	0	0	0	0	0	0	0	0	0.027714	2	0	0	0	0	0	0	0	0	0	0	0	0	0	0	0	0	0	0	0	0	0.23779	15	0.049481	4	0.135462	9	--	--	--	--	--	--	--	--	--	--	--
HORVU.MOREX.r3.1HG0007370	HORVU.MOREX.r3.1HG0007370	--	5.86451	528	6.03869	533	5.52145	497	5.19164	437	5.96647	504	5.5762	508	4.05713	403	3.87706	326	3.58047	357	4.10039	344	3.68442	320	5.18764	433	4.5294	418	3.60561	303	4.42391	364	5.04767	439	3.91344	328	4.87141	403	0.326724	0.136616	normal	1.14123e-05	0.560279	normal	0.371056	0.167531	normal	0.00064223	0.530539
HORVU.MOREX.r3.1HG0007380	HORVU.MOREX.r3.1HG0007380	--	0	0	0	0	0	0	0	0	0	0	0	0	0	0	0	0	0	0	0	0	0	0	0	0	0	0	0	0	0	0	0	0	0	0	0	0	--	--	--	--	--	--	--	--	--	--	--
HORVU.MOREX.r3.1HG0007390	HORVU.MOREX.r3.1HG0007390	--	0	0	0	0	0	0	0	0	0	0	0	0	0	0	0	0	0	0	0	0	0	0	0	0	0	0	0	0	0	0	0	0	0	0	0	0	--	--	--	--	--	--	--	--	--	--	--
HORVU.MOREX.r3.1HG0007410	HORVU.MOREX.r3.1HG0007410	--	0	0	0	0	0	0	0	0	0	0	0	0	0	0	0	0	0	0	0	0	0	0	0	0	0	0	0	0	0	0	0	0	0	0	0	0	--	--	--	--	--	--	--	--	--	--	--
HORVU.MOREX.r3.1HG0007420	HORVU.MOREX.r3.1HG0007420	LOC109787361	0	0	0	0	0	0	0	0	0	0	0	0	0	0	0	0	0	0	0	0	0	0	0	0	0	0	0	0	0	0	0.263508	4	0	0	0	0	--	--	--	--	--	--	--	--	--	--	--
HORVU.MOREX.r3.1HG0007430	HORVU.MOREX.r3.1HG0007430	--	0	0	0	0	0	0	0	0	0	0	0	0	0	0	0	0	0	0	0	0	0	0	0	0	0	0	0	0	0	0	0	0	0	0	0	0	--	--	--	--	--	--	--	--	--	--	--
HORVU.MOREX.r3.1HG0007440	HORVU.MOREX.r3.1HG0007440	--	0	0	0	0	0	0	0	0	0	0	0	0	0	0	0	0	0	0	0	0	0	0	0	0	0	0	0	0	0	0	0	0	0	0	0	0	--	--	--	--	--	--	--	--	--	--	--
HORVU.MOREX.r3.1HG0007450	HORVU.MOREX.r3.1HG0007450	--	0	0	0	0	0	0	0	0	0	0	0	0	0	0	0	0	0	0	0	0	0	0	0	0	0	0	0	0	0	0	0	0	0	0	0	0	--	--	--	--	--	--	--	--	--	--	--
HORVU.MOREX.r3.1HG0007460	HORVU.MOREX.r3.1HG0007460	--	0	0	0	0	0	0	0	0	0	0	0	0	0	0	0	0	0	0	0	0	0	0	0	0	0	0	0	0	0	0	0	0	0	0	0.025528	2	--	--	--	--	--	--	--	--	--	--	--
HORVU.MOREX.r3.1HG0007470	HORVU.MOREX.r3.1HG0007470	--	0	0	0	0	0	0	0	0	0	0	0	0	0	0	0	0	0	0	0	0	0	0	0	0	0	0	0	0	0	0	0	0	0	0	0	0	--	--	--	--	--	--	--	--	--	--	--
HORVU.MOREX.r3.1HG0007500	HORVU.MOREX.r3.1HG0007500	--	0	0	0	0	0	0	0	0	0	0	0	0	0	0	0	0	0	0	0	0	0	0	0	0	0	0	0	0	0	0	0	0	0	0	0	0	--	--	--	--	--	--	--	--	--	--	--
HORVU.MOREX.r3.1HG0007510	HORVU.MOREX.r3.1HG0007510	--	0	0	0	0	0	0	0	0	0	0	0	0	0	0	0	0	0	0	0	0	0	0	0	0	0	0	0	0	0	0	0	0	0	0	0	0	--	--	--	--	--	--	--	--	--	--	--
HORVU.MOREX.r3.1HG0007520	HORVU.MOREX.r3.1HG0007520	--	0	0	0	0	0	0	0	0	0	0	0	0	0	0	0	0	0	0	0	0	0	0	0	0	0.00837	1	0.14573	8	0.116918	6	0.139634	8	0.04067	3	0.148713	8	--	--	--	--	--	--	--	--	--	--	--
HORVU.MOREX.r3.1HG0007530	HORVU.MOREX.r3.1HG0007530	--	0	0	0	0	0	0	0	0	0	0	0	0	0	0	0	0	0	0	0	0	0	0	0	0	0	0	0	0	0	0	0	0	0	0	0	0	--	--	--	--	--	--	--	--	--	--	--
HORVU.MOREX.r3.1HG0007540	HORVU.MOREX.r3.1HG0007540	--	0	0	0	0	0	0	0	0	0	0	0	0	0	0	0	0	0	0	0	0	0	0	0	0	0	0	0	0	0	0	0	0	0	0	0	0	--	--	--	--	--	--	--	--	--	--	--
HORVU.MOREX.r3.1HG0007560	HORVU.MOREX.r3.1HG0007560	--	0	0	0	0	0	0	0	0	0	0	0	0	0	0	0	0	0	0	0	0	0	0	0	0	0	0	0	0	0	0	0	0	0	0	0	0	--	--	--	--	--	--	--	--	--	--	--
HORVU.MOREX.r3.1HG0007570	HORVU.MOREX.r3.1HG0007570	--	0.079768	2	0.112923	3	0.031293	1	0.478814	11	0.761501	17	1.2128	29	0	0	0	0	0.094993	3	0.715307	16	0.971885	22	1.38757	30	0.25129	6	0.057667	2	0.158815	4	2.55567	57	1.87502	41	1.86067	40	--	--	--	--	--	--	--	--	--	--	--
HORVU.MOREX.r3.1HG0007590	HORVU.MOREX.r3.1HG0007590	--	1.42949	123	0.963739	81	0.935549	81	0.12198	10	0.292208	24	0.138624	13	0.635077	61	0.537701	44	0.740294	71	0.863439	70	0.681821	57	0.554564	45	0.54888	49	0.784305	63	0.285586	23	0.208013	18	0.46067	38	0.20588	17	3.85536e-08	-2.08509	down	0.0262139	0.700163	normal	0.787964	0.111272	normal	0.000534424	-1.61629
HORVU.MOREX.r3.1HG0007600	HORVU.MOREX.r3.1HG0007600	--	25.5978	3792	24.1963	3498	26.9095	3990	21.2353	2929	20.569	2861	21.5713	3217	20.2674	3353	19.5152	2693	21.6707	3538	18.3975	2550	18.5977	2638	19.1795	2638	19.8709	3017	19.8895	2742	19.0855	2582	20.944	2979	19.5592	2708	21.4193	2921	0.301099	-0.0813505	normal	1.99377e-05	0.283383	normal	0.0593241	-0.12962	normal	3.48563e-07	0.336338
HORVU.MOREX.r3.1HG0007610	HORVU.MOREX.r3.1HG0007610	--	0	0	0	0	0	0	0	0	0	0	0	0	0	0	0	0	0	0	0	0	0	0	0	0	0	0	0	0	0	0	0	0	0	0	0	0	--	--	--	--	--	--	--	--	--	--	--
HORVU.MOREX.r3.1HG0007620	HORVU.MOREX.r3.1HG0007620	--	0	0	0	0	0	0	0	0	0	0	0	0	0	0	0	0	0	0	0	0	0	0	0	0	0	0	0	0	0	0	0	0	0	0	0	0	--	--	--	--	--	--	--	--	--	--	--
HORVU.MOREX.r3.1HG0007630	HORVU.MOREX.r3.1HG0007630	--	0	0	0	0	0	0	0	0	0	0	0	0	0	0	0	0	0	0	0	0	0	0	0	0	0	0	0	0	0	0	0	0	0	0	0	0	--	--	--	--	--	--	--	--	--	--	--
HORVU.MOREX.r3.1HG0007660	HORVU.MOREX.r3.1HG0007660	--	0	0	0.042612	1	0	0	0	0	0	0	0	0	0	0	0	0	0	0	0	0	0	0	0	0	0.128648	3	0	0	0	0	0	0	0	0	0.111769	3	--	--	--	--	--	--	--	--	--	--	--
HORVU.MOREX.r3.1HG0007670	HORVU.MOREX.r3.1HG0007670	--	1.59538	94	1.22188	70	1.30188	77	0.332037	19	0.383011	22	0.27362	17	2.42907	159	2.08191	114	1.99765	129	1.88703	104	1.76626	100	0.993716	55	1.59777	96	2.51	137	2.51737	135	2.12052	120	2.37288	130	2.07067	112	6.39083e-06	-1.62869	down	0.0111289	-0.658964	normal	0.154919	-0.415878	normal	1.52187e-06	-1.91732
HORVU.MOREX.r3.1HG0007680	HORVU.MOREX.r3.1HG0007680	--	0	0	0	0	0	0	0	0	0.260769	3	0	0	0.637399	9	0	0	0	0	0	0	0	0	0	0	0	0	0	0	0	0	0.065579	1	0	0	0	0	--	--	--	--	--	--	--	--	--	--	--
HORVU.MOREX.r3.1HG0007690	HORVU.MOREX.r3.1HG0007690	--	2.72363	75	2.56458	69	2.93512	81	1.91366	49	1.80853	47	1.54621	43	3.63444	112	2.87224	74	3.65354	111	2.8241	73	2.71566	72	2.39413	61	1.52305	43	1.9639	50	1.35219	34	1.16104	31	1.31616	34	1.37905	35	0.22268	-0.416041	normal	0.275593	-0.32717	normal	0.30458	-0.315447	normal	0.260476	-0.413621
HORVU.MOREX.r3.1HG0007700	HORVU.MOREX.r3.1HG0007700	--	0	0	0	0	0	0	0	0	0	0	0	0	0	0	0	0	0	0	0	0	0	0	0	0	0	0	0	0	0	0	0	0	0	0	0	0	--	--	--	--	--	--	--	--	--	--	--
HORVU.MOREX.r3.1HG0007740	HORVU.MOREX.r3.1HG0007740	--	6.67317	160	7.79292	182	10.0698	241	10.7905	240	8.94021	201	9.61313	231	7.11274	190	9.9463	221	9.69505	255	19.2663	430	21.1648	484	21.775	483	47.5935	1164	45.1723	1003	40.6438	885	45.8448	1050	38.6993	863	41.3778	909	0.0395236	0.43694	normal	0.544512	-0.149757	normal	1.83848e-14	1.16762	up	2.36005e-09	-0.91322
HORVU.MOREX.r3.1HG0007770	HORVU.MOREX.r3.1HG0007770	--	0	0	0	0	0	0	0	0	0	0	0.020322	1	0	0	0	0	0	0	0	0	0	0	0	0	0	0	0	0	0	0	0	0	0	0	0	0	--	--	--	--	--	--	--	--	--	--	--
HORVU.MOREX.r3.1HG0007780	HORVU.MOREX.r3.1HG0007780	LOC100832196	0	0	0	0	0	0	0	0	0	0	0	0	0	0	0	0	0	0	0	0	0	0	0	0	0	0	0	0	0	0	0	0	0	0	0	0	--	--	--	--	--	--	--	--	--	--	--
HORVU.MOREX.r3.1HG0007790	HORVU.MOREX.r3.1HG0007790	--	0	0	0	0	0	0	0	0	0	0	0	0	0	0	0	0	0	0	0	0	0	0	0.051777	1	0	0	0	0	0	0	0	0	0.173032	3	0	0	--	--	--	--	--	--	--	--	--	--	--
HORVU.MOREX.r3.1HG0007800	HORVU.MOREX.r3.1HG0007800	--	0	0	0	0	0	0	0	0	0	0	0	0	0	0	0	0	0	0	0	0	0	0	0	0	0	0	0	0	0	0	0	0	0.208372	2	0	0	--	--	--	--	--	--	--	--	--	--	--
HORVU.MOREX.r3.1HG0007820	HORVU.MOREX.r3.1HG0007820	--	0	0	0	0	0	0	0	0	0	0	0	0	0	0	0	0	0	0	0	0	0	0	0	0	0	0	0	0	0	0	0	0	0	0	0	0	--	--	--	--	--	--	--	--	--	--	--
HORVU.MOREX.r3.1HG0007830	HORVU.MOREX.r3.1HG0007830	--	0	0	0	0	0	0	0	0	0	0	0	0	0	0	0	0	0	0	0	0	0	0	0	0	0	0	0	0	0	0	0	0	0	0	0	0	--	--	--	--	--	--	--	--	--	--	--
HORVU.MOREX.r3.1HG0007840	HORVU.MOREX.r3.1HG0007840	--	29.063	1605	29.7047	1601	25.5988	1415	18.288	940	18.5653	963	20.007	1112	24.9252	1537	27.0988	1394	25.6354	1560	30.4848	1575	29.9743	1585	28.3783	1455	27.5928	1562	28.8647	1483	25.6372	1293	31.7231	1682	30.4906	1574	31.6808	1611	7.96013e-05	-0.372579	normal	0.362662	0.0836795	normal	0.0183885	0.192963	normal	3.63572e-08	-0.480215
HORVU.MOREX.r3.1HG0007850	HORVU.MOREX.r3.1HG0007850	--	33.535	3714	32.8366	3550	33.148	3675	31.7823	3277	30.8774	3211	35.756	3986	24.3888	3016	23.5564	2431	23.8216	2908	26.7143	2768	27.0135	2865	28.6675	2948	25.1932	2860	26.924	2775	24.8072	2509	28.9556	3079	28.0173	2900	29.6635	3025	0.019154	0.176927	normal	9.87416e-16	0.435119	normal	0.00108991	0.197525	normal	9.2924e-09	0.417893
HORVU.MOREX.r3.1HG0007870	HORVU.MOREX.r3.1HG0007870	--	7.62429	185	6.65396	158	7.63878	186	2.78985	63	2.00779	46	2.30042	57	0.287436	8	0.254401	6	0.074671	2	2.30002	53	3.92268	91	4.7997	108	0	0	0	0	0	0	0	0	0	0	0	0	4.31833e-08	-1.36298	down	2.99211e-35	4.49587	up	5.60506e-16	2.77815	up	0.234357	-0.448703
HORVU.MOREX.r3.1HG0007880	HORVU.MOREX.r3.1HG0007880	--	0	0	0	0	0	0	0	0	0	0	0	0	0	0	0	0	0	0	0	0	0	0	0	0	0	0	0	0	0	0	0	0	0	0	0	0	--	--	--	--	--	--	--	--	--	--	--
HORVU.MOREX.r3.1HG0007900	HORVU.MOREX.r3.1HG0007900	--	0.127373	8	0.192119	11	0.256778	15	0	0	0.090189	5	0.206628	12	0.352736	23	0.517528	28	0.47195	30	0.204043	12	0.224068	13	0.245319	14	0.165006	10	0.441711	24	0.189389	10	0.121702	7	0.176125	10	0.137588	8	--	--	--	--	--	--	--	--	--	--	--
HORVU.MOREX.r3.1HG0007910	HORVU.MOREX.r3.1HG0007910	--	8.34804	356	6.98565	291	5.51641	236	6.19314	246	5.60076	224	5.44693	234	5.39277	257	6.3229	251	5.87267	276	6.84502	273	7.11354	290	6.19485	245	5.90933	258	5.67617	225	5.60808	218	6.90715	283	6.56795	262	5.56377	219	0.723584	-0.0793005	normal	0.302802	0.206914	normal	0.328871	0.18796	normal	0.769329	-0.0606573
HORVU.MOREX.r3.1HG0007920	HORVU.MOREX.r3.1HG0007920	--	0	0	0	0	0	0	0	0	0	0	0	0	0	0	0	0	0	0	0	0	0	0	0	0	0	0	0	0	0	0	0	0	0	0	0	0	--	--	--	--	--	--	--	--	--	--	--
HORVU.MOREX.r3.1HG0007930	HORVU.MOREX.r3.1HG0007930	--	0	0	0	0	0	0	0	0	0	0	0	0	0	0	0	0	0	0	0	0	0	0	0	0	0	0	0	0	0	0	0	0	0	0	0	0	--	--	--	--	--	--	--	--	--	--	--
HORVU.MOREX.r3.1HG0007940	HORVU.MOREX.r3.1HG0007940	LOC109763971	36.0504	898	24.8617	605	49.7711	1241	3.32863	78	4.46674	105	3.58514	90	24.5698	683	21.3602	496	25.7728	708	47.2983	1102	65.7113	1567	57.2185	1323	4.96196	127	3.10619	72	6.08085	139	4.91049	118	4.70601	110	8.1054	186	7.35911e-20	-2.84841	down	0.0751048	0.55724	normal	1.40984e-26	1.215	up	2.04968e-124	-3.70381
HORVU.MOREX.r3.1HG0007950	HORVU.MOREX.r3.1HG0007950	--	0	0	0	0	0	0	0	0	0	0	0	0	0	0	0	0	0	0	0	0	0	0	0	0	0	0	0	0	0	0	0	0	0	0	0	0	--	--	--	--	--	--	--	--	--	--	--
HORVU.MOREX.r3.1HG0007960	HORVU.MOREX.r3.1HG0007960	--	0	0	0	0	0	0	0	0	0	0	0	0	0	0	0	0	0	0	0.034189	1	0	0	0.030564	1	0	0	0	0	0.036997	2	0	0	0.116874	4	0.185437	6	--	--	--	--	--	--	--	--	--	--	--
HORVU.MOREX.r3.1HG0007970	HORVU.MOREX.r3.1HG0007970	--	0	0	0	0	0	0	0	0	0	0	0	0	0	0	0	0	0	0	0	0	0	0	0	0	0	0	0	0	0	0	0	0	0	0	0	0	--	--	--	--	--	--	--	--	--	--	--
HORVU.MOREX.r3.1HG0008000	HORVU.MOREX.r3.1HG0008000	LOC117860365	0	0	0	0	0	0	0	0	0	0	0	0	0	0	0	0	0	0	0	0	0	0	0	0	0	0	0	0	0	0	0	0	0	0	0	0	--	--	--	--	--	--	--	--	--	--	--
HORVU.MOREX.r3.1HG0008010	HORVU.MOREX.r3.1HG0008010	--	0	0	0	0	0	0	0	0	0	0	0	0	0	0	0	0	0	0	0	0	0	0	0	0	0	0	0	0	0	0	0	0	0	0	0	0	--	--	--	--	--	--	--	--	--	--	--
HORVU.MOREX.r3.1HG0008050	HORVU.MOREX.r3.1HG0008050	--	0	0	0	0	0	0	0	0	0	0	0	0	0	0	0	0	0	0	0	0	0	0	0	0	0	0	0	0	0	0	0	0	0	0	0	0	--	--	--	--	--	--	--	--	--	--	--
HORVU.MOREX.r3.1HG0008070	HORVU.MOREX.r3.1HG0008070	--	4.85722	149	4.34046	130	6.23839	191	4.96532	141	4.60933	132	4.14528	128	2.56995	88	3.14041	90	2.18301	74	3.92358	112	2.39901	71	2.95347	84	1.99074	63	2.61476	75	2.17534	61	3.4964	103	2.51291	72	3.22924	91	0.953801	0.0174713	normal	0.000496212	0.892322	normal	0.558651	0.201771	normal	0.00938126	0.70842
HORVU.MOREX.r3.1HG0008080	HORVU.MOREX.r3.1HG0008080	--	0.207201	15	0	0	0.021822	2	0.061472	5	0	0	0.099502	7	0	0	0	0	0	0	0.198335	13	0.119326	8	0.307595	20	0	0	0	0	0.156483	10	0.148844	10	0.214328	15	0.153035	10	--	--	--	--	--	--	--	--	--	--	--
HORVU.MOREX.r3.1HG0008100	HORVU.MOREX.r3.1HG0008100	--	0	0	0	0	0	0	0	0	0	0	0	0	0	0	0	0	0	0	0	0	0	0	0	0	0	0	0	0	0	0	0	0	0	0	0	0	--	--	--	--	--	--	--	--	--	--	--
HORVU.MOREX.r3.1HG0008110	HORVU.MOREX.r3.1HG0008110	--	0	0	0	0	0	0	0	0	0	0	0	0	0	0	0	0	0	0	0	0	0	0	0	0	0	0	0	0	0	0	0	0	0	0	0	0	--	--	--	--	--	--	--	--	--	--	--
HORVU.MOREX.r3.1HG0008130	HORVU.MOREX.r3.1HG0008130	--	0	0	0	0	0.036565	2	0	0	0	0	0	0	0	0	0.039288	2	0	0	0.077997	4	0	0	0.037057	2	0	0	0	0	0	0	0	0	0	0	0	0	--	--	--	--	--	--	--	--	--	--	--
HORVU.MOREX.r3.1HG0008140	HORVU.MOREX.r3.1HG0008140	--	6.3149	416	5.56083	358	5.3813	355	2.49097	153	2.01835	125	1.68665	112	4.79369	353	4.90721	301	4.55539	331	10.7931	665	10.7	675	11.0121	673	0.640402	44	0.581203	36	0.356852	22	1.18437	75	0.840797	52	1.00233	61	1.941e-11	-1.25164	down	0.12374	0.237569	normal	5.65817e-25	1.16117	up	4.74048e-44	-2.2094
HORVU.MOREX.r3.1HG0008150	HORVU.MOREX.r3.1HG0008150	--	0	0	0	0	0	0	0	0	0	0	0	0	0	0	0	0	0	0	0	0	0	0	0	0	0	0	0	0	0	0	0	0	0	0	0	0	--	--	--	--	--	--	--	--	--	--	--
HORVU.MOREX.r3.1HG0008160	HORVU.MOREX.r3.1HG0008160	--	0	0	0	0	0	0	0	0	0	0	0	0	0	0	0	0	0	0	0	0	0	0	0	0	0	0	0	0	0	0	0	0	0	0	0	0	--	--	--	--	--	--	--	--	--	--	--
HORVU.MOREX.r3.1HG0008170	HORVU.MOREX.r3.1HG0008170	--	0	0	0	0	0	0	0	0	0	0	0	0	0	0	0	0	0	0	0	0	0	0	0	0	0	0	0	0	0	0	0	0	0	0	0	0	--	--	--	--	--	--	--	--	--	--	--
HORVU.MOREX.r3.1HG0008210	HORVU.MOREX.r3.1HG0008210	--	0	0	0	0	0	0	0	0	0	0	0	0	0	0	0	0	0	0	0	0	0	0	0	0	0	0	0	0	0	0	0	0	0	0	0	0	--	--	--	--	--	--	--	--	--	--	--
HORVU.MOREX.r3.1HG0008260	HORVU.MOREX.r3.1HG0008260	--	0	0	0	0	0	0	0	0	0	0	0	0	0	0	0	0	0	0	0	0	0	0	0	0	0	0	0	0	0	0	0	0	0	0	0	0	--	--	--	--	--	--	--	--	--	--	--
HORVU.MOREX.r3.1HG0008270	HORVU.MOREX.r3.1HG0008270	--	0	0	0	0	0	0	0	0	0	0	0	0	0	0	0	0	0	0	0	0	0	0	0	0	0	0	0	0	0	0	0	0	0	0	0	0	--	--	--	--	--	--	--	--	--	--	--
HORVU.MOREX.r3.1HG0008280	HORVU.MOREX.r3.1HG0008280	--	0	0	0	0	0	0	0	0	0	0	0	0	0	0	0	0	0	0	0	0	0	0	0	0	0	0	0	0	0	0	0	0	0	0	0	0	--	--	--	--	--	--	--	--	--	--	--
HORVU.MOREX.r3.1HG0008290	HORVU.MOREX.r3.1HG0008290	--	0	0	0	0	0	0	0.265185	12	0.259315	12	0.200399	10	0	0	0	0	0	0	0.088077	5	0	0	0	0	0	0	0	0	0	0	0	0	0	0	0	0	--	--	--	--	--	--	--	--	--	--	--
HORVU.MOREX.r3.1HG0008300	HORVU.MOREX.r3.1HG0008300	--	0	0	0	0	0	0	0	0	0	0	0	0	0	0	0	0	0	0	0	0	0	0	0	0	0	0	0	0	0	0	0	0	0	0	0	0	--	--	--	--	--	--	--	--	--	--	--
HORVU.MOREX.r3.1HG0008310	HORVU.MOREX.r3.1HG0008310	--	0	0	0	0	0	0	0	0	0	0	0	0	0	0	0	0	0	0	0	0	0	0	0	0	0	0	0	0	0.055605	4	0.176369	12	0	0	0	0	--	--	--	--	--	--	--	--	--	--	--
HORVU.MOREX.r3.1HG0008320	HORVU.MOREX.r3.1HG0008320	--	0.104355	6	0	0	0.035217	2	0	0	0	0	0	0	0	0	0	0	0.094347	6	0	0	0.03681	2	0	0	0.034394	2	0	0	0	0	0	0	0.140814	8	0	0	--	--	--	--	--	--	--	--	--	--	--
HORVU.MOREX.r3.1HG0008330	HORVU.MOREX.r3.1HG0008330	--	0	0	0	0	0	0	0	0	0	0	0	0	0	0	0.194135	6	0	0	0	0	0	0	0	0	0	0	0	0	0.108689	3	0	0	0	0	0	0	--	--	--	--	--	--	--	--	--	--	--
HORVU.MOREX.r3.1HG0008380	HORVU.MOREX.r3.1HG0008380	--	1.59964	189	1.71484	198	1.64251	194	1.55444	171	1.13686	126	1.39149	166	1.40734	186	1.06942	118	1.30377	170	1.36636	151	1.53979	174	2.00211	220	0.779159	95	1.21942	134	0.698342	76	0.879682	100	1.41746	157	1.20005	131	0.740514	-0.0817915	normal	0.111812	0.340142	normal	0.152415	0.342163	normal	0.712186	-0.0996465
HORVU.MOREX.r3.1HG0008390	HORVU.MOREX.r3.1HG0008390	--	1.20254	17	1.1499	16	2.15799	30	1.8821	24	1.91978	25	0.911426	13	0.995852	16	1.74007	22	0.63216	10	0.669245	9	0.98056	13	0.668975	9	1.07154	15	1.79978	23	1.06604	14	1.31447	18	0.814415	11	1.02749	13	--	--	--	--	--	--	--	--	--	--	--
HORVU.MOREX.r3.1HG0008400	HORVU.MOREX.r3.1HG0008400	--	3.80626	189	2.919	142	2.60032	129	2.23355	103	2.11641	99	2.09253	105	2.15186	119	1.39661	65	2.12662	117	1.52536	71	1.75886	84	2.50827	116	2.41009	123	2.13882	99	1.63528	74	2.2653	108	1.81779	85	1.61979	74	0.211628	-0.325208	normal	0.0149072	0.643099	normal	0.9555	0.021827	normal	0.323467	0.307189
HORVU.MOREX.r3.1HG0008410	HORVU.MOREX.r3.1HG0008410	--	8.92971	200	10.6418	232	17.16	384	12.415	258	8.0591	169	10.3615	233	0.987345	25	0	0	0.765776	19	2.6313	55	3.43942	74	3.79667	79	0.74978	18	0.671118	14	0.777444	16	1.16931	26	0.142581	3	0.897048	19	0.841629	-0.0587584	normal	0.00363809	1.82351	up	0.123207	0.607809	normal	9.20761e-13	1.76766
HORVU.MOREX.r3.1HG0008440	HORVU.MOREX.r3.1HG0008440	--	621.162	27996	635.822	27972	575.587	25970	473.716	19880	447.08	18920	452.225	20518	461.642	23236	470.453	19756	449.843	22350	464.405	19581	466.53	20138	451.263	18885	375.86	17364	363.874	15261	348.326	14337	403.652	17467	412.779	17389	405.853	16842	0.000140218	-0.221622	normal	3.01854e-19	0.370776	normal	0.996905	0.000202812	normal	0.00509199	0.15318
HORVU.MOREX.r3.1HG0008450	HORVU.MOREX.r3.1HG0008450	--	127.551	6960	121.667	6480	121.974	6663	197.833	10051	200.839	10290	181.833	9988	104.092	6343	95.025	4831	93.4653	5622	141.595	7228	148.135	7742	142.352	7213	92.9166	5197	97.3822	4945	103.031	5134	89.2294	4675	90.4268	4612	87.0941	4376	3.05559e-43	0.836876	normal	8.82378e-09	0.307138	normal	7.33441e-30	0.559735	normal	9.06049e-22	0.588354
HORVU.MOREX.r3.1HG0008460	HORVU.MOREX.r3.1HG0008460	--	0	0	0	0	0	0	0	0	0	0	0	0	0	0	0	0	0	0	0	0	0	0	0	0	0	0	0	0	0	0	0	0	0	0	0	0	--	--	--	--	--	--	--	--	--	--	--
HORVU.MOREX.r3.1HG0008470	HORVU.MOREX.r3.1HG0008470	--	0	0	0	0	0	0	0	0	0	0	0	0	0	0	0	0	0	0	0	0	0	0	0	0	0	0	0	0	0	0	0	0	0	0	0	0	--	--	--	--	--	--	--	--	--	--	--
HORVU.MOREX.r3.1HG0008480	HORVU.MOREX.r3.1HG0008480	--	0	0	0	0	0	0	0	0	0	0	0	0	0	0	0	0	0	0	0	0	0	0	0	0	0	0	0	0	0	0	0	0	0	0	0	0	--	--	--	--	--	--	--	--	--	--	--
HORVU.MOREX.r3.1HG0008490	HORVU.MOREX.r3.1HG0008490	--	1.34218	11	1.09915	9	3.21941	26	5.36173	40	6.94636	52	10.3186	82	0	0	0	0	0	0	0.121677	1	0.532172	5	0	0	0	0	0	0	0	0	0	0	0	0	0	0	2.24941e-05	1.83015	up	--	--	--	--	--	--	2.79197e-12	4.25667
HORVU.MOREX.r3.1HG0008500	HORVU.MOREX.r3.1HG0008500	--	0	0	0	0	0	0	0	0	0	0	0	0	0	0	0	0	0	0	0	0	0	0	0	0	0	0	0	0	0	0	0	0	0	0	0	0	--	--	--	--	--	--	--	--	--	--	--
HORVU.MOREX.r3.1HG0008510	HORVU.MOREX.r3.1HG0008510	LOC109759461	20.2023	1551	19.8432	1487	20.1775	1551	18.3938	1315	17.5287	1264	18.0239	1393	15.886	1362	19.108	1367	20.726	1754	20.9556	1505	21.0971	1552	20.7128	1477	19.7568	1555	20.5946	1472	19.4348	1363	20.7677	1531	19.2859	1384	18.6445	1318	0.723044	0.0350583	normal	0.490932	0.0760928	normal	0.115521	0.169174	normal	0.555188	-0.0558248
HORVU.MOREX.r3.1HG0008520	HORVU.MOREX.r3.1HG0008520	--	18.5634	2189	19.9624	2298	18.9167	2233	15.8407	1740	17.9919	1992	18.172	2157	15.0145	1977	15.9527	1753	15.2583	1984	17.1887	1896	17.0744	1929	18.9718	2078	16.8917	2042	17.496	1920	15.0978	1626	16.4332	1861	17.5705	1937	17.5276	1903	0.593446	0.0503722	normal	3.89617e-05	0.277094	normal	0.00715755	0.202052	normal	0.155002	0.128291
HORVU.MOREX.r3.1HG0008550	HORVU.MOREX.r3.1HG0008550	--	0	0	0	0	0	0	0	0	0	0	0	0	0	0	0	0	0	0	0	0	0	0	0	0	0	0	0	0	0	0	0.046317	1	0	0	0	0	--	--	--	--	--	--	--	--	--	--	--
HORVU.MOREX.r3.1HG0008560	HORVU.MOREX.r3.1HG0008560	--	0	0	0	0	0	0	0	0	0	0	0	0	0	0	0	0	0	0	0	0	0	0	0	0	0	0	0	0	0	0	0	0	0	0	0	0	--	--	--	--	--	--	--	--	--	--	--
HORVU.MOREX.r3.1HG0008570	HORVU.MOREX.r3.1HG0008570	--	0	0	0	0	0.268906	4	0	0	0	0	0.206056	4	0	0	0	0	0	0	0	0	0	0	0	0	0	0	0	0	0	0	0.024966	1	0	0	0	0	--	--	--	--	--	--	--	--	--	--	--
HORVU.MOREX.r3.1HG0008580	HORVU.MOREX.r3.1HG0008580	--	0	0	0	0	0	0	0	0	0	0	0	0	0	0	0	0	0	0	0	0	0	0	0	0	0	0	0	0	0	0	0	0	0	0	0	0	--	--	--	--	--	--	--	--	--	--	--
HORVU.MOREX.r3.1HG0008590	HORVU.MOREX.r3.1HG0008590	--	0	0	0	0	0	0	0	0	0	0	0	0	0	0	0	0	0	0	0	0	0	0	0	0	0	0	0	0	0	0	0	0	0	0	0	0	--	--	--	--	--	--	--	--	--	--	--
HORVU.MOREX.r3.1HG0008600	HORVU.MOREX.r3.1HG0008600	--	0	0	0	0	0	0	0.225319	10	0.163789	7	0	0	0	0	0	0	0	0	0	0	0	0	0	0	0	0	0	0	0	0	0	0	0	0	0	0	--	--	--	--	--	--	--	--	--	--	--
HORVU.MOREX.r3.1HG0008610	HORVU.MOREX.r3.1HG0008610	--	0.263411	7	0.187682	5	0.265146	7	10.9921	270	11.3122	280	14.6948	390	0	0	0	0	0	0	0.549342	14	0.152971	4	0	0	0	0	0	0	0	0	0.141266	4	0.069574	2	0.147583	4	3.28823e-62	5.32458	up	--	--	--	--	--	--	4.22681e-07	4.10995
HORVU.MOREX.r3.1HG0008620	HORVU.MOREX.r3.1HG0008620	--	16.7301	951	16.5149	916	14.9934	853	13.4179	710	17.1151	913	16.0621	919	14.0598	892	14.1239	748	15.0964	946	14.2309	757	16.4291	894	16.0819	849	13.5861	792	13.1796	697	12.5095	649	18.0055	982	16.8151	893	19.8297	1038	0.254081	0.142416	normal	0.261299	0.119315	normal	0.368317	0.108592	normal	0.222348	0.156453
HORVU.MOREX.r3.1HG0008630	HORVU.MOREX.r3.1HG0008630	--	0	0	0	0	0	0	0	0	0	0	0	0	0	0	0	0	0	0	0	0	0	0	0	0	0.168946	6	0	0	0.310949	10	0.846019	26	1.06275	32	0.768899	23	--	--	--	--	--	--	--	--	--	--	--
HORVU.MOREX.r3.1HG0008640	HORVU.MOREX.r3.1HG0008640	--	34.4054	571	35.4082	574	29.89	497	23.4756	363	28.8287	450	19.7407	330	28.2206	523	26.2532	406	31.306	573	22.0536	343	20.4244	325	20.2378	312	17.0335	290	19.0981	295	20.1704	306	16.0807	257	14.2801	222	17.9777	275	0.104211	-0.269592	normal	0.200832	0.17772	normal	0.0017863	-0.438019	normal	0.0416505	0.35987
HORVU.MOREX.r3.1HG0008650	HORVU.MOREX.r3.1HG0008650	--	32.8724	3459	33.0183	3391	33.3376	3511	32.6847	3202	32.0819	3169	33.564	3555	32.1787	3781	33.5466	3289	33.7978	3920	34.4875	3395	33.9281	3419	30.897	3019	33.539	3617	33.4287	3273	31.6841	3044	35.0666	3542	35.1717	3459	34.7545	3367	0.00588179	0.180238	normal	0.533777	-0.0397419	normal	0.974384	-0.00290364	normal	0.0445094	0.147644
HORVU.MOREX.r3.1HG0008660	HORVU.MOREX.r3.1HG0008660	--	0	0	0	0	0.214268	6	0	0	0	0	0	0	0	0	0	0	0	0	0.152344	4	0	0	0.145191	4	0.342903	10	0.129095	4	0.079086	2	0	0	0	0	0	0	--	--	--	--	--	--	--	--	--	--	--
HORVU.MOREX.r3.1HG0008670	HORVU.MOREX.r3.1HG0008670	--	0	0	0	0	0	0	0	0	0	0	0	0	0	0	0	0	0	0	0	0	0	0	0	0	0	0	0	0	0	0	0	0	0	0	0	0	--	--	--	--	--	--	--	--	--	--	--
HORVU.MOREX.r3.1HG0008680	HORVU.MOREX.r3.1HG0008680	--	0.485521	33	0.323885	22	0.450044	31	0.238527	15	0	0	0	0	0.667008	51	0.307621	20	0.301812	23	0.448116	29	0.807749	53	0.552447	35	0.252448	18	0.335159	21	0.444079	28	0.431175	28	0.619426	39	1.35241	84	--	--	--	--	--	--	0.425939	0.349883	normal	--	--
HORVU.MOREX.r3.1HG0008690	HORVU.MOREX.r3.1HG0008690	--	0	0	0	0	0	0	0	0	0	0	0	0	0	0	0	0	0	0	0	0	0	0	0	0	0	0	0	0	0	0	0	0	0	0	0	0	--	--	--	--	--	--	--	--	--	--	--
HORVU.MOREX.r3.1HG0008700	HORVU.MOREX.r3.1HG0008700	--	0	0	0	0	0	0	0	0	0.220918	3	0	0	0.182031	2	0.139517	2	0	0	0	0	0	0	0	0	0	0	0	0	0.308914	3	0	0	0	0	0	0	--	--	--	--	--	--	--	--	--	--	--
HORVU.MOREX.r3.1HG0008710	HORVU.MOREX.r3.1HG0008710	--	0.035371	1	0.236323	3	0	0	0	0	0	0	0	0	0	0	0	0	0.081845	2	0	0	0.160569	3	0	0	0	0	0.46273	6	0	0	0	0	0.182627	3	0	0	--	--	--	--	--	--	--	--	--	--	--
HORVU.MOREX.r3.1HG0008720	HORVU.MOREX.r3.1HG0008720	--	0.033623	1	0.030619	1	0.046648	1	0	0	0	0	0	0	0.076107	2	0	0	0	0	0.041598	1	0	0	0	0	0	0	0	0	0	0	0	0	0	0	0.070671	2	--	--	--	--	--	--	--	--	--	--	--
HORVU.MOREX.r3.1HG0008730	HORVU.MOREX.r3.1HG0008730	--	0	0	0	0	0	0	0	0	0.030133	2	0	0	0	0	0	0	0	0	0	0	0	0	0	0	0	0	0	0	0	0	0	0	0	0	0	0	--	--	--	--	--	--	--	--	--	--	--
HORVU.MOREX.r3.1HG0008740	HORVU.MOREX.r3.1HG0008740	--	0	0	0.059545	4	0	0	0	0	0.002857	1	0	0	0	0	0	0	0	0	0	0	0	0	0	0	0	0	0	0	0	0	0	0	0	0	0	0	--	--	--	--	--	--	--	--	--	--	--
HORVU.MOREX.r3.1HG0008750	HORVU.MOREX.r3.1HG0008750	--	0	0	0	0	0	0	0	0	0	0	0	0	0	0	0	0	0	0	0	0	0	0	0	0	0	0	0	0	0	0	0	0	0	0	0	0	--	--	--	--	--	--	--	--	--	--	--
HORVU.MOREX.r3.1HG0008770	HORVU.MOREX.r3.1HG0008770	--	0	0	0	0	0	0	0	0	0	0	0	0	0	0	0.069453	1	0	0	0	0	0	0	0	0	0	0	0	0	0	0	0.071955	2	0	0	0.070758	1	--	--	--	--	--	--	--	--	--	--	--
HORVU.MOREX.r3.1HG0008780	HORVU.MOREX.r3.1HG0008780	--	0	0	0	0	0.152061	2	0	0	0	0	0	0	0	0	0	0	0	0	0	0	0	0	0	0	0	0	0	0	0	0	0	0	0	0	0	0	--	--	--	--	--	--	--	--	--	--	--
HORVU.MOREX.r3.1HG0008790	HORVU.MOREX.r3.1HG0008790	--	2.0431	156	3.01825	225	2.12918	163	3.22525	229	3.58576	257	2.82586	217	2.20051	188	0.966525	69	1.33517	113	1.32761	95	1.56139	115	1.45436	103	0.051187	5	0.028192	3	0	0	0	0	0.06998	5	0.042645	3	0.00434206	0.598022	normal	0.037857	0.596852	normal	0.899505	-0.0490422	normal	7.27047e-10	1.28954
HORVU.MOREX.r3.1HG0008800	HORVU.MOREX.r3.1HG0008800	--	0	0	0	0	0	0	0	0	0	0	0	0	0	0	0	0	0	0	0	0	0	0	0	0	0	0	0	0	0	0	0	0	0	0	0	0	--	--	--	--	--	--	--	--	--	--	--
HORVU.MOREX.r3.1HG0008810	HORVU.MOREX.r3.1HG0008810	--	0.305464	11	0.789857	26	0	0	0.749074	23	0.065065	3	0.303439	11	0	0	0	0	0	0	0.129737	4	0.445664	14	0.224796	7	0	0	0	0	0	0	0	0	0	0	0	0	--	--	--	--	--	--	--	--	--	--	--
HORVU.MOREX.r3.1HG0008820	HORVU.MOREX.r3.1HG0008820	LOC109741532	27.1366	1119	28.5676	1150	23.6253	975	38.3523	1472	36.2839	1405	33.8979	1407	27.8485	1282	27.9011	1072	28.8545	1312	31.8547	1229	31.8077	1256	32.1493	1231	31.9146	1349	34.9302	1340	32.417	1221	39.9071	1580	43.7731	1687	42.0115	1595	4.65211e-11	0.642385	normal	0.19529	-0.128869	normal	0.0378986	0.177139	normal	0.00015615	0.341896
HORVU.MOREX.r3.1HG0008830	HORVU.MOREX.r3.1HG0008830	--	0	0	0	0	0	0	0	0	0	0	0	0	0	0	0	0	0	0	0	0	0	0	0	0	0	0	0	0	0	0	0	0	0	0	0	0	--	--	--	--	--	--	--	--	--	--	--
HORVU.MOREX.r3.1HG0008840	HORVU.MOREX.r3.1HG0008840	--	2.83804	137	3.23054	152	2.61133	126	2.63311	118	1.32151	60	1.66744	81	1.06221	58	0.74072	34	1.36895	73	0.347297	16	0.421148	20	0.165995	8	2.21905	110	2.44327	110	2.30435	102	1.71355	80	2.19623	99	1.71925	77	0.173509	-0.408097	normal	2.31102e-06	1.31576	up	0.00104609	-1.20831	down	1.74121e-09	2.54565
HORVU.MOREX.r3.1HG0008850	HORVU.MOREX.r3.1HG0008850	--	0	0	0	0	0	0	0	0	0	0	0	0	0	0	0	0	0	0	0	0	0	0	0	0	0	0	0	0	0	0	0	0	0	0	0	0	--	--	--	--	--	--	--	--	--	--	--
HORVU.MOREX.r3.1HG0008860	HORVU.MOREX.r3.1HG0008860	--	1.78912	88	1.81367	87	1.91294	94	0.540184	25	0.592877	28	1.25379	62	5.58554	304	4.44312	202	4.40942	237	3.26615	149	4.56051	213	3.2731	148	6.58981	329	7.30338	331	9.17705	408	5.21401	244	6.64499	303	6.7073	301	0.0109902	-0.910978	normal	3.58134e-11	-1.37015	down	0.10798	-0.354925	normal	9.19212e-10	-1.96442
HORVU.MOREX.r3.1HG0008870	HORVU.MOREX.r3.1HG0008870	--	0.01649	1	0.076788	2	0.01747	1	0.214396	6	0.428939	11	0.583745	16	0	0	0	0	0	0	0.025372	1	0.066782	2	0	0	0	0	0	0	0.147738	4	0.057251	2	0	0	0	0	--	--	--	--	--	--	--	--	--	--	--
HORVU.MOREX.r3.1HG0008880	HORVU.MOREX.r3.1HG0008880	--	0.648394	15	0.144605	4	0.606587	14	0	0	0.368464	8	0.429297	10	0	0	0	0	0	0	0	0	0	0	0.43922	10	0	0	0	0	0	0	0	0	0	0	0	0	--	--	--	--	--	--	--	--	--	--	--
HORVU.MOREX.r3.1HG0008890	HORVU.MOREX.r3.1HG0008890	--	56.6917	2909	60.1337	3012	58.3815	2999	58.2195	2782	65.1869	3141	60.0446	3102	57.7658	3311	53.9771	2581	54.6208	3090	60.0858	2885	58.3994	2870	55.4729	2643	58.1778	3060	58.4093	2789	60.4233	2832	66.7645	3289	67.4129	3234	65.5012	3095	0.000340407	0.259493	normal	0.58091	0.0383585	normal	0.402566	0.0635375	normal	0.00148299	0.238829
HORVU.MOREX.r3.1HG0008900	HORVU.MOREX.r3.1HG0008900	--	0	0	0	0	0	0	0.078306	4	0.153751	8	0.054321	4	0	0	0.113601	6	0	0	0	0	0	0	0	0	0	0	0	0	0	0	0	0	0	0	0	0	--	--	--	--	--	--	--	--	--	--	--
HORVU.MOREX.r3.1HG0008910	HORVU.MOREX.r3.1HG0008910	--	2.25638	54	2.70858	63	1.47807	36	5.87476	130	3.36878	75	6.14546	147	5.40773	143	6.35662	141	7.62873	199	6.03226	134	6.7576	154	5.4517	120	7.3279	178	5.9249	131	7.11458	154	7.5039	171	7.15928	159	5.45757	119	2.13829e-05	1.33582	up	3.2481e-08	-1.52417	down	0.789824	-0.0795151	normal	0.803231	-0.0811173
HORVU.MOREX.r3.1HG0008920	HORVU.MOREX.r3.1HG0008920	--	0.929839	13	0.583641	8	0.365493	6	0.757597	10	1.62665	22	1.80733	26	2.68425	42	1.39327	19	2.63408	41	2.22674	29	1.59973	22	1.87109	25	1.42082	21	1.8794	25	2.42235	31	1.77715	24	2.14351	28	2.65787	35	--	--	--	--	--	--	--	--	--	--	--
HORVU.MOREX.r3.1HG0008930	HORVU.MOREX.r3.1HG0008930	--	0	0	0	0	0	0	0	0	0	0	0	0	0.208843	5	0.441785	8	0.323659	7	0.456356	8	0.058369	2	0	0	5.60248	108	4.30699	76	3.95598	68	3.83148	69	4.92029	87	7.09312	123	--	--	--	--	--	--	--	--	--	--	--
HORVU.MOREX.r3.1HG0008940	HORVU.MOREX.r3.1HG0008940	--	0	0	0	0	0	0	0	0	0	0	0	0	0	0	0	0	0	0	0	0	0	0	0	0	0	0	0	0	0	0	0	0	0	0	0	0	--	--	--	--	--	--	--	--	--	--	--
HORVU.MOREX.r3.1HG0008950	HORVU.MOREX.r3.1HG0008950	--	3.71464	333	3.98395	349	3.9955	359	5.47785	457	5.72885	482	5.18267	468	1.98203	199	1.8715	157	1.49692	148	2.09271	176	2.45994	211	2.16053	180	0.839597	78	1.33255	112	1.06941	88	1.39316	120	1.24206	104	1.75778	145	4.72338e-07	0.671094	normal	3.09727e-10	1.06891	up	0.17328	0.304239	normal	2.09524e-21	1.43823
HORVU.MOREX.r3.1HG0008960	HORVU.MOREX.r3.1HG0008960	--	0	0	0	0	0.042074	1	0.332618	3	0	0	0.231355	2	0.102057	1	0	0	0.119874	2	0	0	0	0	0.330871	3	0	0	0	0	0	0	0	0	0	0	0.092392	1	--	--	--	--	--	--	--	--	--	--	--
HORVU.MOREX.r3.1HG0008970	HORVU.MOREX.r3.1HG0008970	--	0	0	0	0	0	0	0	0	0	0	0	0	0	0	0	0	0	0	0	0	0	0	0	0	0	0	0	0	0	0	0	0	0	0	0	0	--	--	--	--	--	--	--	--	--	--	--
HORVU.MOREX.r3.1HG0008980	HORVU.MOREX.r3.1HG0008980	--	23.7407	756	25.0775	780	25.2235	805	17.4206	517	19.5336	584	19.3404	620	31.6678	1127	33.8716	1005	32.0175	1124	42.7259	1273	47.7194	1456	41.3389	1223	19.8363	648	20.0392	594	18.4867	538	21.1944	648	19.6911	587	21.3742	627	0.0903264	-0.200239	normal	2.61195e-06	-0.429994	normal	7.81348e-07	0.429061	normal	5.59163e-25	-1.06159
HORVU.MOREX.r3.1HG0008990	HORVU.MOREX.r3.1HG0008990	LOC109750098	0	0	0	0	0	0	0	0	0	0	0	0	0	0	0	0	0	0	0	0	0	0	0	0	0	0	0	0	0	0	0	0	0	0	0	0	--	--	--	--	--	--	--	--	--	--	--
HORVU.MOREX.r3.1HG0009000	HORVU.MOREX.r3.1HG0009000	--	0	0	0	0	0	0	0	0	0	0	0	0	0	0	0	0	0	0	0	0	0	0	0	0	0	0	0	0	0	0	0	0	0	0	0	0	--	--	--	--	--	--	--	--	--	--	--
HORVU.MOREX.r3.1HG0009010	HORVU.MOREX.r3.1HG0009010	--	0	0	0	0	0	0	0	0	0	0	0	0	0	0	0	0	0	0	0	0	0	0	0	0	0	0	0	0	0	0	0	0	0	0	0	0	--	--	--	--	--	--	--	--	--	--	--
HORVU.MOREX.r3.1HG0009020	HORVU.MOREX.r3.1HG0009020	--	0	0	0	0	0	0	0	0	0	0	0	0	0	0	0	0	0	0	0	0	0	0	0	0	0	0	0	0	0	0	0	0	0	0	0	0	--	--	--	--	--	--	--	--	--	--	--
HORVU.MOREX.r3.1HG0009030	HORVU.MOREX.r3.1HG0009030	--	0	0	0	0	0	0	0	0	0	0	0	0	0	0	0	0	0	0	0	0	0	0	0	0	0	0	0	0	0	0	0	0	0	0	0	0	--	--	--	--	--	--	--	--	--	--	--
HORVU.MOREX.r3.1HG0009040	HORVU.MOREX.r3.1HG0009040	--	0	0	0	0	0	0	0	0	0	0	0	0	0	0	0	0	0	0	0	0	0	0	0	0	0	0	0	0	0	0	0	0	0	0	0	0	--	--	--	--	--	--	--	--	--	--	--
HORVU.MOREX.r3.1HG0009050	HORVU.MOREX.r3.1HG0009050	--	17.1634	483	17.0973	470	17.6868	499	22.9114	601	23.4483	620	21.1781	600	19.3641	609	23.5665	618	20.8564	647	19.2128	506	20.7014	558	23.9679	627	14.8861	430	11.8675	311	16.8384	433	20.4017	552	18.9906	500	17.9932	467	1.83719e-06	0.56651	normal	0.00930471	-0.32619	normal	0.986313	0.00307679	normal	0.0734632	0.242311
HORVU.MOREX.r3.1HG0009080	HORVU.MOREX.r3.1HG0009080	--	0	0	0	0	0	0	0	0	0	0	0	0	0	0	0	0	0	0	0	0	0	0	0	0	0	0	0	0	0	0	0	0	0	0	0	0	--	--	--	--	--	--	--	--	--	--	--
HORVU.MOREX.r3.1HG0009090	HORVU.MOREX.r3.1HG0009090	--	0	0	0	0	0	0	0	0	0	0	0	0	0	0	0	0	0	0	0	0	0	0	0	0	0	0	0	0	0	0	0	0	0.319882	3	0	0	--	--	--	--	--	--	--	--	--	--	--
HORVU.MOREX.r3.1HG0009100	HORVU.MOREX.r3.1HG0009100	--	0.482779	16	0	0	0	0	0.737324	23	1.07683	33	0.759021	25	0	0	0	0	0	0	0	0	0	0	0	0	0	0	0	0	0.228583	7	0	0	0.269375	9	0	0	--	--	--	--	--	--	--	--	--	--	--
HORVU.MOREX.r3.1HG0009110	HORVU.MOREX.r3.1HG0009110	--	0	0	0	0	0	0	0	0	0	0	0	0	0	0	0	0	0	0	0	0	0	0	0	0	0	0	0	0	0	0	0	0	0	0	0	0	--	--	--	--	--	--	--	--	--	--	--
HORVU.MOREX.r3.1HG0009120	HORVU.MOREX.r3.1HG0009120	--	0.327242	18	0.328175	17	0.236062	13	0.265064	13	0.227987	12	0.28582	15	0	0	0	0	0	0	0	0	0	0	0	0	0	0	0	0	0	0	0	0	0	0	0.060279	3	--	--	--	--	--	--	--	--	--	--	--
HORVU.MOREX.r3.1HG0009130	HORVU.MOREX.r3.1HG0009130	--	0	0	0	0	0	0	0	0	0	0	0	0	0	0	0	0	0	0	0	0	0	0	0	0	0	0	0	0	0	0	0	0	0	0	0	0	--	--	--	--	--	--	--	--	--	--	--
HORVU.MOREX.r3.1HG0009140	HORVU.MOREX.r3.1HG0009140	--	0	0	0	0	0	0	0.148695	3	0.070891	1	0.547494	9	0	0	0	0	0	0	0	0	0	0	0.157231	3	0.098707	2	0.093467	2	0	0	0	0	0.089255	2	0.054945	1	--	--	--	--	--	--	--	--	--	--	--
HORVU.MOREX.r3.1HG0009170	HORVU.MOREX.r3.1HG0009170	LOC109759285	0	0	0	0	0	0	0.288102	4	0.262366	4	0.516968	8	0	0	0	0	0	0	0	0	0	0	0	0	0.065427	2	0.123477	2	0.073437	2	0	0	0.077011	2	0.196668	3	--	--	--	--	--	--	--	--	--	--	--
HORVU.MOREX.r3.1HG0009200	HORVU.MOREX.r3.1HG0009200	--	2.09419	32	1.46663	22	1.59528	24	1.12504	16	1.62776	23	1.28531	20	0.555491	10	0.574876	8	0.810364	14	0.731686	11	1.52136	22	0.553725	8	0.635948	10	0.044202	1	0.451883	7	0.606317	9	0	0	0.175302	3	--	--	--	--	--	--	--	--	--	--	--
HORVU.MOREX.r3.1HG0009210	HORVU.MOREX.r3.1HG0009210	--	2.60356	378	2.48517	352	2.51449	366	2.29758	311	2.32868	318	3.074	449	1.719	279	0.999754	136	1.11567	179	1.29433	176	1.10787	154	1.40864	190	0.498429	75	0.414178	56	0.662685	88	0.491878	69	0.27347	38	0.352912	48	0.220306	0.209408	normal	1.81194e-06	0.921446	normal	0.966453	-0.0134712	normal	1.41422e-10	1.16569
HORVU.MOREX.r3.1HG0009220	HORVU.MOREX.r3.1HG0009220	--	0	0	0	0	0	0	0	0	0	0	0	0	0	0	0	0	0	0	0	0	0	0	0	0	0.16815	5	0	0	0	0	0	0	0	0	0	0	--	--	--	--	--	--	--	--	--	--	--
HORVU.MOREX.r3.1HG0009250	HORVU.MOREX.r3.1HG0009250	--	0	0	0	0	0	0	0	0	0	0	0	0	0	0	0	0	0	0	0.09377	1	0	0	0	0	0	0	0	0	0	0	0	0	0	0	0	0	--	--	--	--	--	--	--	--	--	--	--
HORVU.MOREX.r3.1HG0009260	HORVU.MOREX.r3.1HG0009260	--	0.024777	1	0	0	0	0	0.463004	6	0	0	0.563373	8	0.043263	1	0.032709	1	0	0	0.390115	5	0.143834	2	0.113136	2	0	0	0	0	0	0	0	0	0	0	0	0	--	--	--	--	--	--	--	--	--	--	--
HORVU.MOREX.r3.1HG0009270	HORVU.MOREX.r3.1HG0009270	--	0	0	0	0	0	0	0	0	0	0	0	0	0	0	0	0	0	0	0	0	0	0	0	0	0	0	0	0	0	0	0	0	0	0	0	0	--	--	--	--	--	--	--	--	--	--	--
HORVU.MOREX.r3.1HG0009310	HORVU.MOREX.r3.1HG0009310	--	0.222697	3	0	0	0	0	0.534067	6	0.43089	5	0.411169	5	0	0	0.215868	3	0.314139	4	0.297248	4	0.589824	7	0.809283	9	0.135361	2	1.35633	15	0.398346	5	1.30551	15	1.16695	13	0.337487	4	--	--	--	--	--	--	--	--	--	--	--
HORVU.MOREX.r3.1HG0009320	HORVU.MOREX.r3.1HG0009320	--	1.35624	31	1.15776	26	1.27619	30	2.86344	61	3.32216	71	3.90091	90	1.33787	35	2.57048	55	1.79793	46	2.0697	45	3.20068	70	1.7909	38	0.801305	19	1.05279	23	1.07807	23	0.978156	22	1.74025	38	2.6238	55	1.56584e-05	1.45594	up	--	--	--	0.578786	0.234532	normal	0.0778694	0.644133
HORVU.MOREX.r3.1HG0009330	HORVU.MOREX.r3.1HG0009330	--	0.972532	49	0.522395	26	0.538593	27	1.43081	67	2.31886	109	2.00756	101	1.04496	59	0.733449	35	1.23827	69	1.1277	53	0.977762	47	1.12969	53	0.790394	41	0.753454	35	0.921695	42	1.40823	68	1.32082	62	0.645558	30	5.84376e-06	1.5385	up	0.195819	-0.546213	normal	0.876947	0.0685078	normal	0.00308361	0.957175
HORVU.MOREX.r3.1HG0009340	HORVU.MOREX.r3.1HG0009340	--	0.001956	1	0	0	0.016413	1	0.221419	4	0	0	0.058292	1	0	0	0.109589	2	0.037618	1	0.010036	1	0.044114	1	0.063197	1	0	0	0	0	0.04498	1	0.061121	1	0	0	0	0	--	--	--	--	--	--	--	--	--	--	--
HORVU.MOREX.r3.1HG0009350	HORVU.MOREX.r3.1HG0009350	--	0.033089	1	0.091378	2	0.303221	5	0.494421	7	0.229825	3	0.4535	7	0.097906	2	0.077204	2	0.51072	8	0.110722	2	0.18626	3	0	0	0.085146	2	0	0	0.204795	3	0.338648	5	0	0	0.156254	3	--	--	--	--	--	--	--	--	--	--	--
HORVU.MOREX.r3.1HG0009360	HORVU.MOREX.r3.1HG0009360	--	23.1962	1466	24.0293	1482	23.4503	1484	18.4555	1086	16.0319	952	17.5816	1119	6.29777	445	5.92172	349	5.69132	397	6.73781	399	6.75188	409	8.39473	493	1.19837	78	1.13535	68	1.6314	95	2.45639	150	1.49645	89	2.79855	163	0.00941928	-0.244723	normal	1.99963e-99	1.93108	up	0.0683019	0.278799	normal	1.78807e-32	1.40669
HORVU.MOREX.r3.1HG0009370	HORVU.MOREX.r3.1HG0009370	LOC109758204	1.51494	26	2.78734	47	2.19814	38	0.746051	12	0.592615	10	0.650154	12	0.369203	7	1.2608	20	0.461196	9	0.970275	16	1.17965	20	0.747693	12	1.32428	23	1.34996	22	0.808969	13	2.66938	44	2.45877	39	2.4709	39	--	--	--	--	--	--	--	--	--	--	--
HORVU.MOREX.r3.1HG0009380	HORVU.MOREX.r3.1HG0009380	--	0.803131	8	3.17996	28	4.85881	44	0	0	0	0	0	0	0	0	0	0	0	0	0	0	0.682178	6	0.585961	5	0	0	0	0	0	0	0	0	0	0	0	0	--	--	--	--	--	--	--	--	--	--	--
HORVU.MOREX.r3.1HG0009390	HORVU.MOREX.r3.1HG0009390	--	0.015975	2	0.008183	1	0	0	0	0	0.004253	1	0	0	0.135518	19	0.047095	6	0.127869	18	0	0	0	0	0.009864	2	0.030755	4	0	0	0.06076	7	0.01248	2	0.015952	2	0.004338	1	--	--	--	--	--	--	--	--	--	--	--
HORVU.MOREX.r3.1HG0009400	HORVU.MOREX.r3.1HG0009400	--	0	0	0.020562	3	0	0	0	0	0	0	0	0	0	0	0	0	0	0	0	0	0	0	0	0	0	0	0	0	0	0	0	0	0	0	0	0	--	--	--	--	--	--	--	--	--	--	--
HORVU.MOREX.r3.1HG0009410	HORVU.MOREX.r3.1HG0009410	--	1.68328	18	0.607179	7	0.173627	2	2.3566	23	0.495503	5	2.15181	23	3.43297	40	3.54667	34	5.67826	64	5.98954	58	3.33085	33	3.40676	33	4.90869	52	4.00187	38	3.40955	32	13.4346	132	10.8011	104	11.5202	109	--	--	--	--	--	--	0.980919	0.0118275	normal	--	--
HORVU.MOREX.r3.1HG0009420	HORVU.MOREX.r3.1HG0009420	--	12.1965	1073	11.764	1010	11.2909	994	11.9862	981	10.5524	871	12.119	1073	12.0312	1181	11.9722	981	11.5847	1123	13.0335	1072	12.5249	1055	12.1766	994	13.859	1249	12.6402	1034	12.7114	1021	13.2541	1119	13.7952	1134	14.0515	1138	0.116548	0.167905	normal	0.63218	-0.0484971	normal	0.426546	0.0836128	normal	0.737433	0.0396642
HORVU.MOREX.r3.1HG0009450	HORVU.MOREX.r3.1HG0009450	--	0.110802	2	0	0	0	0	0.352236	6	0	0	0.323597	6	0.099218	2	0	0	0	0	1.10149	19	1.64819	29	0.650737	11	0	0	0	0	0	0	0	0	0	0	0	0	--	--	--	--	--	--	--	--	--	--	--
HORVU.MOREX.r3.1HG0009460	HORVU.MOREX.r3.1HG0009460	--	2.9134	144	3.36577	162	3.59577	177	2.58607	119	3.34858	155	2.31004	115	2.83003	156	3.01249	138	2.16052	118	1.53188	71	1.26785	60	0.874833	40	0	0	0.081054	4	0.133695	7	0	0	0	0	0	0	0.824216	-0.0624545	normal	0.290403	0.259991	normal	0.000310918	-0.970957	normal	1.69908e-05	1.29059
HORVU.MOREX.r3.1HG0009470	HORVU.MOREX.r3.1HG0009470	--	0	0	0	0	0	0	0	0	0	0	0	0	0	0	0	0	0	0	0	0	0	0	0	0	0	0	0	0	0	0	0	0	0	0	0	0	--	--	--	--	--	--	--	--	--	--	--
HORVU.MOREX.r3.1HG0009480	HORVU.MOREX.r3.1HG0009480	--	8.93566	670	9.25281	677	9.79162	735	3.3047	231	3.12828	220	4.15024	313	15.7862	1321	12.3768	864	15.174	1253	6.93412	486	7.1621	514	7.35409	512	3.5223	271	3.63785	254	4.73223	324	1.92306	139	3.49622	245	3.13942	217	1.13091e-17	-1.19114	down	1.03479e-09	-0.661502	normal	3.93939e-20	-0.994488	normal	1.77197e-08	-0.850164
HORVU.MOREX.r3.1HG0009490	HORVU.MOREX.r3.1HG0009490	--	2.1661	162	2.9684	217	2.39848	180	1.82463	128	2.01012	142	2.38651	180	4.19446	351	3.72846	260	4.38719	362	3.32126	233	3.53355	254	4.21028	293	1.46595	113	1.32707	93	1.46883	101	1.5704	113	2.22853	156	1.68666	117	0.779775	-0.0731024	normal	4.32859e-05	-0.730531	normal	0.461963	-0.14729	normal	0.00115358	-0.656973
HORVU.MOREX.r3.1HG0009560	HORVU.MOREX.r3.1HG0009560	--	0	0	0	0	0	0	0	0	0	0	0	0	0	0	0	0	0	0	0	0	0	0	0	0	0	0	0	0	0	0	0	0	0	0	0	0	--	--	--	--	--	--	--	--	--	--	--
HORVU.MOREX.r3.1HG0009590	HORVU.MOREX.r3.1HG0009590	--	0	0	0	0	0	0	0	0	0	0	0	0	0	0	0	0	0	0	0	0	0	0	0	0	0	0	0	0	0	0	0	0	0	0	0	0	--	--	--	--	--	--	--	--	--	--	--
HORVU.MOREX.r3.1HG0009600	HORVU.MOREX.r3.1HG0009600	--	1.87696	59	1.38251	43	0.800387	25	1.47389	43	1.16909	35	1.61123	51	1.51065	53	1.49821	44	1.31132	46	1.43953	42	2.09018	63	1.52451	45	1.45092	47	1.5212	45	1.74895	50	2.59105	78	2.05774	60	2.28719	66	0.608382	0.232685	normal	0.804514	-0.114384	normal	0.658715	0.180785	normal	0.861063	-0.0811363
HORVU.MOREX.r3.1HG0009610	HORVU.MOREX.r3.1HG0009610	LOC109744924	0.658293	24	0.455914	16	0.228456	8	0.206326	7	0.5245	18	0.999636	36	0.559777	22	0.184101	6	0.645416	25	0.473459	16	0.735489	25	0.347496	12	0.911454	33	0.686728	23	0.671386	22	0.853997	29	0.546665	18	1.17101	38	--	--	--	--	--	--	--	--	--	--	--
HORVU.MOREX.r3.1HG0009630	HORVU.MOREX.r3.1HG0009630	--	0	0	0.010527	1	0	0	0	0	0	0	0	0	0	0	0	0	0.009322	1	0.021676	1	0	0	0	0	0	0	0	0	0.021905	1	0	0	0	0	0.022322	1	--	--	--	--	--	--	--	--	--	--	--
HORVU.MOREX.r3.1HG0009640	HORVU.MOREX.r3.1HG0009640	--	0	0	0.120354	3	0	0	0	0	0	0	0	0	0	0	0	0	0	0	0	0	0	0	0	0	0	0	0	0	0	0	0	0	0	0	0	0	--	--	--	--	--	--	--	--	--	--	--
HORVU.MOREX.r3.1HG0009650	HORVU.MOREX.r3.1HG0009650	--	0.029244	1	0	0	0	0	0	0	0.012666	1	0	0	0	0	0	0	0	0	0	0	0.030331	1	0	0	0	0	0	0	0	0	0	0	0	0	0	0	--	--	--	--	--	--	--	--	--	--	--
HORVU.MOREX.r3.1HG0009660	HORVU.MOREX.r3.1HG0009660	--	0	0	0.03973	1	0	0	0.020269	1	0	0	0	0	0	0	0	0	0.140721	4	0.082631	2	0	0	0	0	0	0	0	0	0.031849	1	0.040393	1	0	0	0	0	--	--	--	--	--	--	--	--	--	--	--
HORVU.MOREX.r3.1HG0009670	HORVU.MOREX.r3.1HG0009670	--	0	0	0	0	0	0	0	0	0	0	0	0	0	0	0	0	0	0	0	0	0	0	0	0	0	0	0	0	0	0	0	0	0	0	0	0	--	--	--	--	--	--	--	--	--	--	--
HORVU.MOREX.r3.1HG0009680	HORVU.MOREX.r3.1HG0009680	--	0	0	0	0	0	0	0	0	0	0	0	0	0	0	0	0	0	0	0	0	0	0	0	0	0	0	0	0	0	0	0	0	0	0	0	0	--	--	--	--	--	--	--	--	--	--	--
HORVU.MOREX.r3.1HG0009710	HORVU.MOREX.r3.1HG0009710	--	0	0	0	0	0	0	0	0	0	0	0	0	0	0	0	0	0	0	0	0	0	0	0	0	0	0	0	0	0	0	0	0	0	0	0	0	--	--	--	--	--	--	--	--	--	--	--
HORVU.MOREX.r3.1HG0009720	HORVU.MOREX.r3.1HG0009720	nad6	0	0	0	0	0	0	0	0	0	0	0	0	0	0	0	0	0	0	0	0	0	0	0	0	0	0	0	0	0	0	0	0	0	0	0	0	--	--	--	--	--	--	--	--	--	--	--
HORVU.MOREX.r3.1HG0009730	HORVU.MOREX.r3.1HG0009730	--	0	0	0	0	0	0	0	0	0	0	0	0	0	0	0	0	0	0	0	0	0	0	0	0	0	0	0	0	0	0	0	0	0	0	0	0	--	--	--	--	--	--	--	--	--	--	--
HORVU.MOREX.r3.1HG0009740	HORVU.MOREX.r3.1HG0009740	--	0.076931	5	0.141636	8	0.09281	5	0.023416	2	0.056997	3	0	0	0	0	0.095733	5	0.252746	15	0.210551	11	0.268396	14	0.183313	10	0.194944	11	0.188773	10	0.231427	12	0.104903	6	0.068787	4	0.161462	8	--	--	--	--	--	--	--	--	--	--	--
HORVU.MOREX.r3.1HG0009750	HORVU.MOREX.r3.1HG0009750	--	0	0	0	0	0	0	0	0	0	0	0	0	0	0	0	0	0	0	0	0	0	0	0	0	0.474795	6	0	0	0	0	0	0	0	0	0	0	--	--	--	--	--	--	--	--	--	--	--
HORVU.MOREX.r3.1HG0009760	HORVU.MOREX.r3.1HG0009760	--	0.017892	3	0.036297	5	0.105349	12	0	0	0	0	0	0	0.095231	13	0.091962	10	0.099262	13	0.15149	17	0.086811	10	0.019078	3	0.171788	20	0.112572	12	0.043323	5	0.309678	34	0.131658	14	0.07536	8	--	--	--	--	--	--	--	--	--	--	--
HORVU.MOREX.r3.1HG0009770	HORVU.MOREX.r3.1HG0009770	--	0	0	0	0	0	0	0	0	0	0	0	0	0	0	0	0	0	0	0.20457	4	0	0	0	0	0	0	0	0	0.019335	1	0	0	0	0	0	0	--	--	--	--	--	--	--	--	--	--	--
HORVU.MOREX.r3.1HG0009780	HORVU.MOREX.r3.1HG0009780	--	0	0	0	0	0	0	0	0	0.069849	1	0	0	0	0	0	0	0	0	0	0	0	0	0	0	0.042656	1	0	0	0	0	0	0	0	0	0	0	--	--	--	--	--	--	--	--	--	--	--
HORVU.MOREX.r3.1HG0009790	HORVU.MOREX.r3.1HG0009790	--	0	0	0	0	0	0	0	0	0	0	0.154181	3	0	0	0	0	0	0	0	0	0	0	0	0	0	0	0.036824	1	0	0	0	0	0	0	0	0	--	--	--	--	--	--	--	--	--	--	--
HORVU.MOREX.r3.1HG0009800	HORVU.MOREX.r3.1HG0009800	--	0	0	0.037228	1	0	0	0	0	0	0	0	0	0.073954	2	0	0	0.03746	1	0.088281	2	0	0	0	0	0.080572	2	0.073368	1	0.068129	1	0	0	0	0	0	0	--	--	--	--	--	--	--	--	--	--	--
HORVU.MOREX.r3.1HG0009810	HORVU.MOREX.r3.1HG0009810	--	0	0	0	0	0	0	0	0	0	0	0	0	0	0	0	0	0	0	0.239273	5	0	0	0	0	0	0	0	0	0.036923	1	0	0	0	0	0	0	--	--	--	--	--	--	--	--	--	--	--
HORVU.MOREX.r3.1HG0009820	HORVU.MOREX.r3.1HG0009820	--	0	0	0	0	0	0	0	0	0	0	0	0	0	0	0	0	0	0	0	0	0	0	0	0	0.021328	1	0	0	0	0	0	0	0	0	0	0	--	--	--	--	--	--	--	--	--	--	--
HORVU.MOREX.r3.1HG0009830	HORVU.MOREX.r3.1HG0009830	--	0	0	0	0	0.078806	1	0	0	0	0	0	0	0.486077	7	0.954168	11	0.36692	5	0.517311	6	0.177654	2	0.098278	2	0.356112	5	0.253705	3	0.097994	2	0.708887	8	0.234316	3	0	0	--	--	--	--	--	--	--	--	--	--	--
HORVU.MOREX.r3.1HG0009840	HORVU.MOREX.r3.1HG0009840	--	0	0	0.424557	7	0.426757	7	0.290821	4	0.21727	3	0.415303	7	1.00227	17	0.499774	7	0.400424	7	0.776929	11	0.504335	8	0.970445	14	0.375738	6	0.655228	9	0.958181	13	1.05672	15	0.37192	6	0.311994	5	--	--	--	--	--	--	--	--	--	--	--
HORVU.MOREX.r3.1HG0009860	HORVU.MOREX.r3.1HG0009860	--	0	0	0	0	0	0	0	0	0	0	0	0	0	0	0	0	0	0	0	0	0	0	0	0	0	0	0	0	0	0	0	0	0	0	0	0	--	--	--	--	--	--	--	--	--	--	--
HORVU.MOREX.r3.1HG0009870	HORVU.MOREX.r3.1HG0009870	--	0	0	0	0	0	0	0	0	0	0	0	0	0	0	0	0	0	0	0	0	0	0	0	0	0	0	0	0	0	0	0	0	0	0	0	0	--	--	--	--	--	--	--	--	--	--	--
HORVU.MOREX.r3.1HG0009910	HORVU.MOREX.r3.1HG0009910	--	0	0	0	0	0	0	0	0	0	0	0	0	0	0	0	0	0	0	0	0	0	0	0	0	0	0	0	0	0	0	0	0	0	0	0	0	--	--	--	--	--	--	--	--	--	--	--
HORVU.MOREX.r3.1HG0009920	HORVU.MOREX.r3.1HG0009920	--	0	0	0	0	0	0	0	0	0	0	0	0	0	0	0	0	0	0	0	0	0	0	0	0	0	0	0	0	0	0	0	0	0	0	0	0	--	--	--	--	--	--	--	--	--	--	--
HORVU.MOREX.r3.1HG0009930	HORVU.MOREX.r3.1HG0009930	--	0.106439	4	0.032713	2	0.031897	2	0.083105	3	0.084906	3	0.09368	3	2.52009	89	0.962161	29	2.80962	97	1.7268	51	2.22931	67	2.79734	82	2.0779	67	2.51996	74	3.57204	103	2.61353	79	2.11359	62	1.35539	40	--	--	--	--	--	--	0.877458	0.0710563	normal	2.17391e-12	-3.85911
HORVU.MOREX.r3.1HG0009940	HORVU.MOREX.r3.1HG0009940	--	0	0	0	0	0	0	0	0	0	0	0	0	0	0	0	0	0	0	0	0	0	0	0	0	0	0	0.041087	1	0	0	0	0	0	0	0	0	--	--	--	--	--	--	--	--	--	--	--
HORVU.MOREX.r3.1HG0009950	HORVU.MOREX.r3.1HG0009950	--	0.167033	4	0.45826	9	0.225248	5	0.318775	6	0.239977	5	0.168248	4	4.22068	95	8.08176	151	4.16614	92	3.81363	72	4.18237	80	4.33136	81	3.8285	79	3.71127	69	2.36804	44	4.14139	80	3.15665	59	2.2381	42	--	--	--	1.52149e-18	-3.59855	down	0.280865	-0.351944	normal	2.40402e-13	-3.51448
HORVU.MOREX.r3.1HG0009960	HORVU.MOREX.r3.1HG0009960	--	0	0	0	0	0	0	0	0	0	0	0	0	0	0	0	0	0	0	0	0	0	0	0	0	0	0	0.033518	1	0	0	0	0	0	0	0	0	--	--	--	--	--	--	--	--	--	--	--
HORVU.MOREX.r3.1HG0010000	HORVU.MOREX.r3.1HG0010000	--	0	0	0	0	0	0	0	0	0	0	0	0	0	0	0	0	0	0	0	0	0	0	0	0	0	0	0	0	0	0	0	0	0	0	0	0	--	--	--	--	--	--	--	--	--	--	--
HORVU.MOREX.r3.1HG0010010	HORVU.MOREX.r3.1HG0010010	--	0	0	0	0	0	0	0	0	0	0	0	0	0	0	0	0	0	0	0	0	0	0	0	0	0	0	0	0	0	0	0	0	0	0	0	0	--	--	--	--	--	--	--	--	--	--	--
HORVU.MOREX.r3.1HG0010020	HORVU.MOREX.r3.1HG0010020	--	0	0	0	0	0	0	0	0	0	0	0	0	0	0	0	0	0	0	0	0	0	0	0	0	0	0	0	0	0	0	0	0	0	0	0	0	--	--	--	--	--	--	--	--	--	--	--
HORVU.MOREX.r3.1HG0010030	HORVU.MOREX.r3.1HG0010030	--	0	0	0	0	0	0	0	0	0	0	0	0	0	0	0	0	0	0	0	0	0	0	0	0	0	0	0	0	0	0	0	0	0	0	0	0	--	--	--	--	--	--	--	--	--	--	--
HORVU.MOREX.r3.1HG0010060	HORVU.MOREX.r3.1HG0010060	--	0	0	0	0	0	0	0	0	0	0	0	0	0	0	0	0	0	0	0	0	0	0	0	0	0	0	0	0	0	0	0	0	0	0	0	0	--	--	--	--	--	--	--	--	--	--	--
HORVU.MOREX.r3.1HG0010070	HORVU.MOREX.r3.1HG0010070	--	0	0	0	0	0	0	0	0	0	0	0	0	0	0	0	0	0	0	0	0	0	0	0	0	0	0	0	0	0	0	0	0	0	0	0	0	--	--	--	--	--	--	--	--	--	--	--
HORVU.MOREX.r3.1HG0010080	HORVU.MOREX.r3.1HG0010080	--	0.151985	22	0.156607	22	0.026748	4	0.014952	3	0.025849	4	0.012862	2	0.492189	79	0.565231	76	0.756607	120	0	0	0.014536	3	0.021091	3	0.087697	13	0.14268	20	0.155603	21	0.097592	14	0.014895	3	0.127271	17	--	--	--	1.49794e-07	-2.14421	down	2.60885e-20	-3.22054	down	--	--
HORVU.MOREX.r3.1HG0010090	HORVU.MOREX.r3.1HG0010090	--	0	0	0	0	0.017788	2	0	0	0	0	0	0	0	0	0	0	0	0	0	0	0	0	0	0	0	0	0	0	0	0	0	0	0	0	0	0	--	--	--	--	--	--	--	--	--	--	--
HORVU.MOREX.r3.1HG0010100	HORVU.MOREX.r3.1HG0010100	--	0	0	0	0	0	0	0	0	0	0	0	0	0	0	0	0	0	0	0	0	0	0	0	0	0	0	0	0	0	0	0	0	0	0	0	0	--	--	--	--	--	--	--	--	--	--	--
HORVU.MOREX.r3.1HG0010110	HORVU.MOREX.r3.1HG0010110	--	0	0	0	0	0	0	0	0	0	0	0	0	0	0	0	0	0	0	0	0	0	0	0	0	0	0	0	0	0	0	0	0	0	0	0	0	--	--	--	--	--	--	--	--	--	--	--
HORVU.MOREX.r3.1HG0010120	HORVU.MOREX.r3.1HG0010120	--	0	0	0	0	0	0	0	0	0	0	0	0	0	0	0	0	0	0	0	0	0	0	0	0	0	0	0	0	0	0	0	0	0	0	0	0	--	--	--	--	--	--	--	--	--	--	--
HORVU.MOREX.r3.1HG0010130	HORVU.MOREX.r3.1HG0010130	--	0	0	0	0	0	0	0	0	0	0	0	0	0	0	0	0	0	0	0	0	0	0	0	0	0	0	0	0	0	0	0	0	0	0	0	0	--	--	--	--	--	--	--	--	--	--	--
HORVU.MOREX.r3.1HG0010140	HORVU.MOREX.r3.1HG0010140	--	0.055021	3	0.036744	2	0.045801	3	0	0	0.078131	4	0	0	0.029342	2	0.097898	5	0.033275	2	0.036116	2	0.019107	1	0.019752	1	0.017893	1	0	0	0	0	0.019103	1	0	0	0	0	--	--	--	--	--	--	--	--	--	--	--
HORVU.MOREX.r3.1HG0010150	HORVU.MOREX.r3.1HG0010150	--	0	0	0	0	0	0	0	0	0	0	0	0	0	0	0	0	0	0	0	0	0	0	0	0	0	0	0	0	0	0	0	0	0	0	0	0	--	--	--	--	--	--	--	--	--	--	--
HORVU.MOREX.r3.1HG0010170	HORVU.MOREX.r3.1HG0010170	--	0.066399	4	0.040008	2	0.107497	5	0	0	0.094287	5	0	0	0.03541	2	0.118353	5	0.143359	8	0.129175	6	0.225905	10	0.023836	1	0.021592	1	0	0	0.168683	7	0.023053	1	0	0	0	0	--	--	--	--	--	--	--	--	--	--	--
HORVU.MOREX.r3.1HG0010220	HORVU.MOREX.r3.1HG0010220	--	0	0	0	0	0	0	0	0	0	0	0	0	0	0	0	0	0	0	0	0	0	0	0	0	0	0	0	0	0	0	0	0	0	0	0	0	--	--	--	--	--	--	--	--	--	--	--
HORVU.MOREX.r3.1HG0010230	HORVU.MOREX.r3.1HG0010230	--	0	0	0.093243	2	0	0	0	0	0	0	0	0	0.121436	3	0	0	0.307146	8	0	0	0	0	0	0	0	0	0	0	0	0	0	0	0	0	0	0	--	--	--	--	--	--	--	--	--	--	--
HORVU.MOREX.r3.1HG0010250	HORVU.MOREX.r3.1HG0010250	--	0	0	0	0	0	0	0	0	0	0	0	0	0	0	0	0	0	0	0	0	0	0	0	0	0	0	0	0	0	0	0	0	0	0	0	0	--	--	--	--	--	--	--	--	--	--	--
HORVU.MOREX.r3.1HG0010270	HORVU.MOREX.r3.1HG0010270	--	0	0	0	0	0.083561	2	0	0	0	0	0.049058	1	0	0	0.072656	2	0.137144	4	0	0	0.020871	1	0	0	0.088165	2	0.036102	1	0	0	0.019246	1	0	0	0	0	--	--	--	--	--	--	--	--	--	--	--
HORVU.MOREX.r3.1HG0010280	HORVU.MOREX.r3.1HG0010280	--	0	0	0	0	0	0	0	0	0	0	0	0	0	0	0	0	0	0	0	0	0	0	0	0	0	0	0.354586	6	0	0	0	0	0	0	0.35585	6	--	--	--	--	--	--	--	--	--	--	--
HORVU.MOREX.r3.1HG0010290	HORVU.MOREX.r3.1HG0010290	LOC109771787	0.521765	6	0.845695	10	0.524106	6	0	0	0	0	0	0	0	0	0	0	0	0	0	0	0	0	0	0	0	0	0	0	0	0	0	0	0	0	0	0	--	--	--	--	--	--	--	--	--	--	--
HORVU.MOREX.r3.1HG0010310	HORVU.MOREX.r3.1HG0010310	--	0	0	0	0	0	0	0	0	0	0	0	0	0	0	0	0	0	0	0	0	0	0	0	0	0	0	0	0	0	0	0	0	0	0	0	0	--	--	--	--	--	--	--	--	--	--	--
HORVU.MOREX.r3.1HG0010320	HORVU.MOREX.r3.1HG0010320	LOC104584987	0	0	0	0	0	0	0	0	0	0	0	0	0	0	0	0	0	0	0	0	0	0	0	0	0	0	0	0	0	0	0	0	0	0	0	0	--	--	--	--	--	--	--	--	--	--	--
HORVU.MOREX.r3.1HG0010330	HORVU.MOREX.r3.1HG0010330	--	0.178589	6	0.151856	5	0.059465	2	0	0	0.055792	2	0	0	0.213225	8	0.374838	12	0	0	0	0	0.124312	4	0.128221	4	0.114604	4	0.124958	4	0.032593	1	0.334411	11	0.345617	11	0.473071	15	--	--	--	--	--	--	--	--	--	--	--
HORVU.MOREX.r3.1HG0010340	HORVU.MOREX.r3.1HG0010340	--	0.780613	26	0.853703	28	1.04194	34	0.670117	21	0.738119	23	0.547716	18	3.17977	116	3.88124	118	4.57996	165	5.19328	158	4.93247	154	4.30191	130	3.4437	115	4.10684	125	2.83891	85	3.14996	99	1.6624	51	2.66312	80	--	--	--	2.52297e-11	-1.99395	down	0.282317	0.278921	normal	1.40653e-16	-2.60878
HORVU.MOREX.r3.1HG0010350	HORVU.MOREX.r3.1HG0010350	--	0	0	0	0	0	0	0	0	0	0	0	0	0	0	0	0	0	0	0	0	0	0	0	0	0	0	0	0	0	0	0	0	0	0	0	0	--	--	--	--	--	--	--	--	--	--	--
HORVU.MOREX.r3.1HG0010370	HORVU.MOREX.r3.1HG0010370	--	16.0795	1940	15.9808	1882	17.7311	2142	11.0072	1237	12.323	1396	14.811	1799	12.4741	1681	11.6758	1313	13.0082	1730	11.6746	1318	12.6971	1467	12.6314	1415	11.1212	1376	12.6692	1423	11.17	1231	11.2336	1302	11.7422	1325	11.9614	1329	0.0893552	-0.189766	normal	1.02017e-06	0.384568	normal	0.948781	-0.00745407	normal	0.0644525	0.204778
HORVU.MOREX.r3.1HG0010380	HORVU.MOREX.r3.1HG0010380	--	0	0	0	0	0	0	0	0	0	0	0	0	0	0	0	0	0	0	0	0	0	0	0	0	0.700353	28	1.79992	65	0.755653	27	1.60517	60	1.58078	58	1.17678	42	--	--	--	--	--	--	--	--	--	--	--
HORVU.MOREX.r3.1HG0010400	HORVU.MOREX.r3.1HG0010400	--	0	0	0.095185	1	0.559338	7	0	0	0	0	0	0	0.852508	11	0.199443	3	0.013486	1	0.091371	1	0.408091	5	0.100062	1	0.978344	11	1.19947	13	1.13	12	0.829034	9	0.412191	5	0.580591	6	--	--	--	--	--	--	--	--	--	--	--
HORVU.MOREX.r3.1HG0010410	HORVU.MOREX.r3.1HG0010410	--	0	0	0	0	0	0	0	0	0	0	0	0	0.405269	4	0.733951	6	0	0	0.317813	3	0.617418	5	0.782705	6	0	0	1.04549	8	0.678273	5	0.5557	5	0.434722	4	0.623423	5	--	--	--	--	--	--	--	--	--	--	--
HORVU.MOREX.r3.1HG0010420	HORVU.MOREX.r3.1HG0010420	--	0.418703	6	0	0	0	0	0	0	0	0	0	0	0.309361	5	0.037449	1	0.41505	7	0.533715	7	0.393045	6	0.754184	10	0.965584	14	0.113543	2	0.899222	12	0.405397	6	0.307048	4	0.349078	5	--	--	--	--	--	--	--	--	--	--	--
HORVU.MOREX.r3.1HG0010430	HORVU.MOREX.r3.1HG0010430	--	0	0	0	0	0	0	0	0	0	0	0	0	0.193442	4	0	0	0	0	0	0	0	0	0	0	0	0	0	0	0	0	0	0	0	0	0	0	--	--	--	--	--	--	--	--	--	--	--
HORVU.MOREX.r3.1HG0010440	HORVU.MOREX.r3.1HG0010440	--	0	0	0	0	0	0	0	0	0	0	0	0	0	0	0	0	0	0	0	0	0	0	0	0	0	0	0	0	0	0	0	0	0	0	0	0	--	--	--	--	--	--	--	--	--	--	--
HORVU.MOREX.r3.1HG0010450	HORVU.MOREX.r3.1HG0010450	--	90.6444	7917	86.4532	7371	86.7295	7583	28.5578	2323	28.0403	2300	27.4127	2411	189.867	18519	188.68	15354	184.312	17745	195.091	15940	187.793	15709	193.323	15678	220.476	19738	238.272	19365	226.946	18101	202.607	16989	204.381	16685	200.719	16140	9.22025e-131	-1.45292	down	1.07423e-175	-1.12728	down	0.475373	0.0336086	normal	0	-2.61233
HORVU.MOREX.r3.1HG0010460	HORVU.MOREX.r3.1HG0010460	--	0	0	0	0	0	0	0	0	0	0	0	0	0	0	0	0	0	0	0	0	0	0	0	0	0	0	0	0	0	0	0	0	0	0	0	0	--	--	--	--	--	--	--	--	--	--	--
HORVU.MOREX.r3.1HG0010470	HORVU.MOREX.r3.1HG0010470	LOC109782769	89.4855	4482	90.0957	4404	82.6958	4146	104.502	4873	100.061	4705	105.449	5316	71.4907	3999	72.4189	3379	70.9831	3919	59.1955	2774	57.0428	2736	58.1845	2706	55.0633	2827	54.6274	2546	56.4905	2584	55.8032	2683	48.7762	2284	47.5547	2193	4.28278e-12	0.43415	normal	3.27062e-06	0.251089	normal	2.4591e-08	-0.299586	normal	3.54013e-61	0.991091
HORVU.MOREX.r3.1HG0010480	HORVU.MOREX.r3.1HG0010480	--	0	0	0	0	0	0	0	0	0	0	0	0	0	0	0	0	0	0	0	0	0	0	0	0	0	0	0	0	0	0	0	0	0	0	0	0	--	--	--	--	--	--	--	--	--	--	--
HORVU.MOREX.r3.1HG0010490	HORVU.MOREX.r3.1HG0010490	--	61.751	1164	63.235	1163	61.4605	1159	59.2863	1040	53.4058	945	56.8107	1078	59.9733	1262	61.2527	1075	59.1856	1229	56.1126	989	56.5828	1021	57.5099	1006	52.4003	1012	58.4676	1025	54.7064	941	62.8184	1136	65.4825	1153	60.8712	1056	0.602739	0.0564914	normal	0.901434	0.0123363	normal	0.412513	-0.0829893	normal	0.123455	0.156797
HORVU.MOREX.r3.1HG0010500	HORVU.MOREX.r3.1HG0010500	--	0	0	0	0	0.035913	1	0	0	0	0	0.093109	2	0	0	0	0	0.04572	2	0	0	0	0	0	0	0	0	0	0	0	0	0	0	0	0	0	0	--	--	--	--	--	--	--	--	--	--	--
HORVU.MOREX.r3.1HG0010510	HORVU.MOREX.r3.1HG0010510	--	0	0	0	0	0	0	0	0	0	0	0	0	0	0	0	0	0	0	0	0	0	0	0	0	0	0	0	0	0	0	0	0	0	0	0	0	--	--	--	--	--	--	--	--	--	--	--
HORVU.MOREX.r3.1HG0010520	HORVU.MOREX.r3.1HG0010520	--	0	0	0	0	0	0	0	0	0	0	0	0	0	0	0	0	0	0	0.164386	11	0.094843	6	0	0	0.303261	21	0.322258	20	0.468373	28	0.516525	33	0.362074	23	0.56367	34	--	--	--	--	--	--	--	--	--	--	--
HORVU.MOREX.r3.1HG0010530	HORVU.MOREX.r3.1HG0010530	--	10.3311	640	12.5427	759	11.2613	699	11.6301	671	12.8411	747	10.2236	638	17.1419	1186	16.4186	948	16.1505	1103	15.7203	911	16.3167	968	14.1223	813	10.1596	645	11.2705	650	13.8486	784	9.93663	591	9.8584	571	11.3825	649	0.108841	0.215064	normal	6.73024e-09	-0.574182	normal	0.350102	-0.105372	normal	0.0498905	-0.248102
HORVU.MOREX.r3.1HG0010540	HORVU.MOREX.r3.1HG0010540	--	0	0	0	0	0	0	0	0	0	0	0	0	0	0	0	0	0	0	0	0	0	0	0	0	0	0	0	0	0	0	0	0	0	0	0	0	--	--	--	--	--	--	--	--	--	--	--
HORVU.MOREX.r3.1HG0010580	HORVU.MOREX.r3.1HG0010580	--	0	0	0	0	0	0	0	0	0	0	0	0	0	0	0	0	0	0	0	0	0	0	0	0	0	0	0	0	0	0	0	0	0	0	0	0	--	--	--	--	--	--	--	--	--	--	--
HORVU.MOREX.r3.1HG0010590	HORVU.MOREX.r3.1HG0010590	--	0	0	0	0	0	0	0	0	0	0	0	0	0	0	0	0	0	0	0	0	0	0	0	0	0	0	0	0	0	0	0	0	0	0	0	0	--	--	--	--	--	--	--	--	--	--	--
HORVU.MOREX.r3.1HG0010600	HORVU.MOREX.r3.1HG0010600	--	2.52182	146	3.16041	178	3.35412	194	2.03925	110	1.67126	91	2.16461	126	3.82113	246	4.2834	230	4.51987	287	3.68625	199	3.56751	197	3.86135	207	0.016963	2	0.397355	22	0.360984	19	0.217076	12	0.228553	13	0.186201	10	0.0946242	-0.407865	normal	0.0103584	-0.501343	normal	0.408007	-0.173158	normal	0.0007502	-0.740922
HORVU.MOREX.r3.1HG0010610	HORVU.MOREX.r3.1HG0010610	--	3.29623	132	4.19895	164	4.47189	180	3.21402	120	2.18434	83	2.46286	100	4.43976	199	3.87458	145	4.25944	188	2.96332	111	3.6688	141	4.19285	156	4.62918	190	4.30004	161	3.89389	143	2.92099	113	3.13339	118	3.04883	113	0.140013	-0.388612	normal	0.670514	-0.105421	normal	0.427358	-0.202945	normal	0.325705	-0.285209
HORVU.MOREX.r3.1HG0010620	HORVU.MOREX.r3.1HG0010620	--	0	0	0	0	0	0	0	0	0	0	0	0	0	0	0	0	0	0	0	0	0	0	0	0	0	0	0	0	0	0	0	0	0	0	0	0	--	--	--	--	--	--	--	--	--	--	--
HORVU.MOREX.r3.1HG0010630	HORVU.MOREX.r3.1HG0010630	--	0	0	0	0	0	0	0	0	0	0	0	0	0	0	0	0	0	0	0	0	0	0	0	0	0	0	0	0	0	0	0	0	0	0	0	0	--	--	--	--	--	--	--	--	--	--	--
HORVU.MOREX.r3.1HG0010640	HORVU.MOREX.r3.1HG0010640	--	2.22562	112	2.67245	131	3.26151	164	4.96932	232	5.15088	242	4.37003	220	5.68222	318	5.41989	253	3.80947	210	3.1718	149	4.00662	192	4.52147	210	2.85824	147	3.86846	180	3.708	170	7.71599	371	7.69946	360	6.3084	291	1.52379e-06	0.98639	normal	7.88537e-05	-0.8687	normal	0.153812	-0.325136	normal	0.0253876	0.465657
HORVU.MOREX.r3.1HG0010650	HORVU.MOREX.r3.1HG0010650	--	175.197	4237	169.861	4009	174.688	4229	227.158	5115	223.416	5073	194.93	4745	65.4991	1769	62.8664	1417	55.9176	1491	200.162	4528	199.722	4626	196.521	4413	45.2723	1123	48.9844	1103	39.1488	865	63.5335	1475	51.241	1159	60.1945	1341	5.18845e-12	0.504782	normal	2.03069e-109	1.45609	up	1.20314e-165	1.68263	up	0.000229429	0.277052
HORVU.MOREX.r3.1HG0010660	HORVU.MOREX.r3.1HG0010660	--	13.7161	316	14.2185	320	15.3901	355	19.0767	409	16.9291	366	13.7854	320	28.5602	735	34.5026	741	34.2305	869	233.951	5039	228.818	5045	221.512	4735	84.7684	2001	91.6901	1965	78.7213	1655	125.536	2775	117.13	2521	121.675	2579	0.0217206	0.386575	normal	1.46419e-21	-1.18837	down	0	2.78871	up	0	-3.60762
HORVU.MOREX.r3.1HG0010670	HORVU.MOREX.r3.1HG0010670	--	0.694326	11	0.677721	11	0.255502	4	1.16831	17	1.14645	17	1.0437	17	0.282288	5	0.170817	3	0	0	0	0	0.284869	5	0.180817	3	0.185552	3	0.051215	1	0.071338	1	0	0	0	0	0	0	--	--	--	--	--	--	--	--	--	--	--
HORVU.MOREX.r3.1HG0010680	HORVU.MOREX.r3.1HG0010680	--	0.998881	13	1.06915	13	0.678453	9	1.88307	22	1.14342	14	1.82031	23	0.256954	4	0	0	0	0	0.562732	7	0.331509	4	0.213857	3	0.423645	6	0.071522	1	0.206693	3	0	0	0	0	0	0	--	--	--	--	--	--	--	--	--	--	--
HORVU.MOREX.r3.1HG0010690	HORVU.MOREX.r3.1HG0010690	--	0	0	0	0	0	0	0	0	0	0	0	0	0	0	0	0	0	0	0	0	0	0	0	0	0	0	0	0	0	0	0	0	0	0	0	0	--	--	--	--	--	--	--	--	--	--	--
HORVU.MOREX.r3.1HG0010700	HORVU.MOREX.r3.1HG0010700	--	0.978815	18	1.66906	29	0.282238	5	3.25293	54	3.56851	59	4.32336	77	0	0	0	0	0.399821	8	0	0	0.297779	6	0.216456	4	0.151126	3	0	0	0	0	0	0	0	0	0	0	3.06077e-05	1.79413	up	--	--	--	--	--	--	8.53893e-13	3.90375
HORVU.MOREX.r3.1HG0010710	HORVU.MOREX.r3.1HG0010710	--	0.443875	10	0.714103	16	1.33887	30	3.8024	79	3.47481	73	3.29252	74	0	0	0	0	0.039867	1	0.103048	3	0.344926	8	0.364616	8	0	0	0	0	0	0	0	0	0	0	0.073392	2	1.35261e-07	2.00317	up	--	--	--	--	--	--	7.76486e-14	3.44269
HORVU.MOREX.r3.1HG0010720	HORVU.MOREX.r3.1HG0010720	--	3.28293	123	3.40584	125	5.01871	188	14.7928	515	10.7731	379	13.1157	494	0	0	0	0	0	0	0.635371	23	3.14873	113	2.19063	77	0	0	0.115021	4	0	0	0.502608	19	0	0	0	0	1.50785e-23	1.86549	up	6.3283e-32	5.79668	up	--	--	--	6.92948e-06	2.54391
HORVU.MOREX.r3.1HG0010730	HORVU.MOREX.r3.1HG0010730	--	0	0	0	0	0	0	0	0	0	0	0	0	0	0	0	0	0	0	0	0	0	0	0	0	0	0	0	0	0	0	0	0	0	0	0	0	--	--	--	--	--	--	--	--	--	--	--
HORVU.MOREX.r3.1HG0010740	HORVU.MOREX.r3.1HG0010740	--	0	0	0	0	0	0	0	0	0	0	0	0	0.077027	1	0	0	0	0	0	0	0	0	0	0	0	0	0	0	0	0	0	0	0	0	0	0	--	--	--	--	--	--	--	--	--	--	--
HORVU.MOREX.r3.1HG0010750	HORVU.MOREX.r3.1HG0010750	--	0	0	0	0	0	0	0.32803	12	0.224191	8	0	0	0	0	0	0	0	0	0.056584	3	0	0	0	0	0	0	0	0	0	0	0	0	0	0	0	0	--	--	--	--	--	--	--	--	--	--	--
HORVU.MOREX.r3.1HG0010760	HORVU.MOREX.r3.1HG0010760	--	0	0	0	0	0	0	0	0	0	0	0	0	0	0	0	0	0	0	0	0	0	0	0	0	0	0	0	0	0	0	0	0	0	0	0	0	--	--	--	--	--	--	--	--	--	--	--
HORVU.MOREX.r3.1HG0010780	HORVU.MOREX.r3.1HG0010780	--	0	0	0.457895	5	0.101174	2	0.099654	1	0	0	0.152542	2	0.280279	4	0	0	0.314767	4	0.104773	2	0.092107	1	0.562985	6	0.111561	2	0.121482	2	0	0	0	0	0.151704	2	0.104329	1	--	--	--	--	--	--	--	--	--	--	--
HORVU.MOREX.r3.1HG0010790	HORVU.MOREX.r3.1HG0010790	--	0.058163	10	0.02075	4	0	0	0.012739	3	0.01259	2	0.071517	13	0.038603	8	0.015649	3	0.016086	4	0.060445	10	0.005308	1	0.029919	5	0.011533	2	0	0	0.042978	7	0.012313	2	0.020911	4	0	0	--	--	--	--	--	--	--	--	--	--	--
HORVU.MOREX.r3.1HG0010800	HORVU.MOREX.r3.1HG0010800	--	5.60953	327	5.34952	305	6.29401	368	2.7266	148	3.17437	174	2.11865	125	3.76657	246	4.73653	258	4.69648	302	3.41745	187	3.45304	193	2.97038	161	3.99823	239	4.24352	231	3.21269	171	2.94085	165	2.94201	161	3.25082	175	3.69524e-06	-0.888684	normal	0.0452705	0.345044	normal	0.0399753	-0.399584	normal	0.615647	-0.130938
HORVU.MOREX.r3.1HG0010810	HORVU.MOREX.r3.1HG0010810	--	0	0	0	0	0	0	0	0	0	0	0	0	0	0	0	0	0	0	0	0	0	0	0	0	0	0	0	0	0	0	0	0	0	0	0	0	--	--	--	--	--	--	--	--	--	--	--
HORVU.MOREX.r3.1HG0010820	HORVU.MOREX.r3.1HG0010820	--	0	0	0	0	0	0	0	0	0	0	0	0	0	0	0	0	0	0	0	0	0	0	0	0	0	0	0	0	0	0	0	0	0	0	0	0	--	--	--	--	--	--	--	--	--	--	--
HORVU.MOREX.r3.1HG0010830	HORVU.MOREX.r3.1HG0010830	--	0	0	0	0	0	0	0	0	0	0	0	0	0	0	0	0	0	0	0	0	0	0	0	0	0	0	0	0	0	0	0	0	0	0	0	0	--	--	--	--	--	--	--	--	--	--	--
HORVU.MOREX.r3.1HG0010840	HORVU.MOREX.r3.1HG0010840	--	0	0	0	0	0	0	0	0	0	0	0	0	0	0	0	0	0	0	0	0	0	0	0	0	0	0	0	0	0	0	0	0	0	0	0	0	--	--	--	--	--	--	--	--	--	--	--
HORVU.MOREX.r3.1HG0010850	HORVU.MOREX.r3.1HG0010850	--	0	0	0	0	0	0	0	0	0	0	0	0	0	0	0	0	0	0	0	0	0	0	0	0	0	0	0	0	0	0	0	0	0	0	0	0	--	--	--	--	--	--	--	--	--	--	--
HORVU.MOREX.r3.1HG0010860	HORVU.MOREX.r3.1HG0010860	--	0.383855	6	0.250114	4	0.113485	2	0	0	0.399543	6	0.34145	5	0.172295	3	0.334675	5	0.19209	3	0.926566	12	0.188784	3	0.707038	10	2.79966	40	2.06041	27	2.17365	28	0.801638	11	2.11025	28	3.02026	39	--	--	--	--	--	--	--	--	--	--	--
HORVU.MOREX.r3.1HG0010870	HORVU.MOREX.r3.1HG0010870	--	0.483209	7	0.953296	12	0.080268	1	0.733558	9	0.580237	7	0.768966	10	1.34413	19	0.923979	11	1.01083	14	1.23059	15	1.34298	17	0.514047	6	3.49952	45	3.49382	41	3.71679	43	4.95987	60	4.369	51	2.80566	33	--	--	--	--	--	--	--	--	--	--	--
HORVU.MOREX.r3.1HG0010880	HORVU.MOREX.r3.1HG0010880	--	4.29188	74	5.66743	95	6.08584	105	4.61522	74	5.09701	83	3.28974	57	13.8811	266	14.5568	233	17.7219	336	14.5226	234	16.5589	273	16.7963	268	4.65724	82	4.42628	71	5.75644	91	5.85352	97	8.77636	141	7.0064	111	0.781717	-0.0996069	normal	6.01558e-13	-1.50908	down	0.830037	0.050599	normal	1.43293e-13	-1.68662
HORVU.MOREX.r3.1HG0010890	HORVU.MOREX.r3.1HG0010890	--	344.582	16638	353.991	16507	362.278	17347	253.238	11361	245.3	11123	238.813	11526	456.982	24586	452.937	20199	449.875	23782	321.049	14445	321.436	14909	327.647	14746	452.064	22920	481.449	21755	472.156	20801	254.913	12576	267.67	12920	269.75	12433	3.56623e-09	-0.324603	normal	3.67879e-26	-0.394444	normal	2.10688e-47	-0.476526	normal	1.49978e-05	-0.238242
HORVU.MOREX.r3.1HG0010920	HORVU.MOREX.r3.1HG0010920	--	0.402585	19	0.479699	23	0.387414	19	0.62822	28	0.807378	36	0.620651	30	0.473636	25	0.613816	27	0.276191	15	0.355	16	0.450697	21	0.27031	12	0.079824	4	0.1373	7	0.202175	9	0.30766	14	0.379583	17	0.407993	18	--	--	--	--	--	--	--	--	--	--	--
HORVU.MOREX.r3.1HG0010930	HORVU.MOREX.r3.1HG0010930	--	13.0531	274	12.645	259	9.80205	206	10.3406	202	9.16181	181	8.5142	180	12.4145	291	11.4859	225	12.3735	286	12.7801	251	11.5601	233	10.6443	208	9.66345	208	9.5875	188	7.96169	153	10.0909	204	8.94223	176	11.5659	224	0.519573	-0.142331	normal	0.746337	-0.0674228	normal	0.835361	-0.0483625	normal	0.467798	-0.157469
HORVU.MOREX.r3.1HG0010940	HORVU.MOREX.r3.1HG0010940	--	0	0	0	0	0	0	0	0	0	0	0	0	0	0	0	0	0	0	0	0	0	0	0	0	0	0	0	0	0	0	0	0	0	0	0	0	--	--	--	--	--	--	--	--	--	--	--
HORVU.MOREX.r3.1HG0010950	HORVU.MOREX.r3.1HG0010950	--	0	0	0.338528	6	0.171419	3	0	0	0	0	0	0	0	0	0	0	0	0	0	0	0	0	0	0	0	0	0	0	0	0	0	0	0	0	0	0	--	--	--	--	--	--	--	--	--	--	--
HORVU.MOREX.r3.1HG0010960	HORVU.MOREX.r3.1HG0010960	--	0	0	0	0	0	0	0	0	0	0	0.67021	8	0	0	0	0	0	0	0	0	0	0	0	0	0	0	0	0	0	0	0.15067	2	0.396388	5	0.562633	7	--	--	--	--	--	--	--	--	--	--	--
HORVU.MOREX.r3.1HG0010970	HORVU.MOREX.r3.1HG0010970	--	0	0	0.056382	2	0	0	0	0	0	0	0	0	0	0	0	0	0	0	0	0	0	0	0	0	0	0	0.203939	7	0.138541	5	0.335375	11	0.542106	17	0.688676	21	--	--	--	--	--	--	--	--	--	--	--
HORVU.MOREX.r3.1HG0010980	HORVU.MOREX.r3.1HG0010980	--	0	0	0	0	0	0	0	0	0	0	0	0	0	0	0	0	0	0	0	0	0	0	0	0	0	0	0	0	0	0	0	0	0.140195	4	0	0	--	--	--	--	--	--	--	--	--	--	--
HORVU.MOREX.r3.1HG0010990	HORVU.MOREX.r3.1HG0010990	LOC109749665	0	0	0	0	0	0	0.205188	5	0	0	0	0	0	0	0	0	0.096398	3	0	0	0	0	0	0	0	0	0	0	0.62793	14	0	0	0.262424	6	0.089701	3	--	--	--	--	--	--	--	--	--	--	--
HORVU.MOREX.r3.1HG0011010	HORVU.MOREX.r3.1HG0011010	--	0	0	0	0	0	0	0	0	0	0	0	0	0.014136	1	0	0	0	0	0	0	0.032417	1	0	0	0	0	0	0	0	0	0	0	0	0	0	0	--	--	--	--	--	--	--	--	--	--	--
HORVU.MOREX.r3.1HG0011020	HORVU.MOREX.r3.1HG0011020	--	24.0809	1344	23.9771	1306	22.867	1278	20.0691	1043	20.583	1079	20.0363	1126	9.34465	583	10.4544	544	10.3018	634	8.74123	457	10.1279	542	10.3974	539	8.10004	464	8.88058	462	7.66219	391	10.6759	572	9.22119	481	8.96384	461	0.773426	-0.0305087	normal	1.26497e-39	1.19367	up	0.817621	-0.0392432	normal	2.10045e-30	1.20959
HORVU.MOREX.r3.1HG0011060	HORVU.MOREX.r3.1HG0011060	--	0	0	0	0	0	0	0	0	0	0	0	0	0	0	0	0	0	0	0	0	0	0	0	0	0	0	0	0	0	0	0	0	0	0	0	0	--	--	--	--	--	--	--	--	--	--	--
HORVU.MOREX.r3.1HG0011070	HORVU.MOREX.r3.1HG0011070	--	0	0	0	0	0	0	0	0	0	0	0	0	0	0	0	0	0	0	0	0	0	0	0	0	0	0	0	0	0	0	0	0	0	0	0	0	--	--	--	--	--	--	--	--	--	--	--
HORVU.MOREX.r3.1HG0011080	HORVU.MOREX.r3.1HG0011080	--	4.9855	194	5.68717	216	4.34462	169	1.49582	55	1.05088	39	1.27747	50	0	0	0	0	0	0	0.675206	25	1.1812	44	2.45279	89	0	0	0	0	0	0	0	0	0	0	0	0	2.29635e-11	-1.68127	down	9.3944e-39	6.21574	up	--	--	--	0.999668	-0.000216899
HORVU.MOREX.r3.1HG0011090	HORVU.MOREX.r3.1HG0011090	--	0	0	0	0	0	0	0	0	0	0	0	0	0	0	0	0	0	0	0	0	0	0	0	0	0	0	0	0	0	0	0	0	0	0	0	0	--	--	--	--	--	--	--	--	--	--	--
HORVU.MOREX.r3.1HG0011100	HORVU.MOREX.r3.1HG0011100	LOC109749665	0	0	0	0	0	0	0	0	0	0	0	0	0	0	0	0	0	0	0	0	0	0	0	0	0	0	0	0	0	0	0	0	0	0	0	0	--	--	--	--	--	--	--	--	--	--	--
HORVU.MOREX.r3.1HG0011110	HORVU.MOREX.r3.1HG0011110	--	6.13936	358	6.13925	349	6.02454	351	6.38668	346	6.84205	374	5.40451	317	6.25824	407	5.87354	319	4.81921	309	5.54415	302	5.06027	282	5.96567	323	4.2557	254	6.17205	334	5.82324	310	6.01424	336	6.37287	347	6.23152	334	0.189684	0.215093	normal	0.67403	0.0752032	normal	0.891066	-0.0308287	normal	0.0538294	0.329334
HORVU.MOREX.r3.1HG0011130	HORVU.MOREX.r3.1HG0011130	--	0	0	0	0	0	0	0	0	0	0	0	0	0	0	0	0	0	0	0	0	0	0	0	0	0	0	0	0	0	0	0	0	0	0	0	0	--	--	--	--	--	--	--	--	--	--	--
HORVU.MOREX.r3.1HG0011140	HORVU.MOREX.r3.1HG0011140	--	7.30647	187	5.6088	140	7.36622	189	12.9459	309	18.6053	447	14.4816	373	0	0	0	0	0.141956	5	0.77195	19	0.544893	14	1.22152	29	0	0	0	0	0	0	0	0	0	0	0	0	3.70113e-13	1.34065	up	2.41121e-35	5.34598	up	--	--	--	7.69693e-57	4.22068
HORVU.MOREX.r3.1HG0011150	HORVU.MOREX.r3.1HG0011150	--	0.154966	3	0.094147	2	0.053999	1	0	0	0	0	0	0	0.193626	4	0	0	0.120637	3	0	0	0	0	0.174653	4	0	0	0	0	0	0	0	0	0.113741	2	0	0	--	--	--	--	--	--	--	--	--	--	--
HORVU.MOREX.r3.1HG0011160	HORVU.MOREX.r3.1HG0011160	--	0.525473	9	1.15486	18	0	0	0.131802	2	0.103753	2	0	0	0.24471	5	0.321372	5	0.58228	11	0.544113	9	0.422278	7	0.350628	6	0.775959	13	0.677982	10	0.697322	11	0.739713	12	0.765671	12	0.597753	9	--	--	--	--	--	--	--	--	--	--	--
HORVU.MOREX.r3.1HG0011170	HORVU.MOREX.r3.1HG0011170	--	12.0751	540	12.7859	558	12.2508	548	10.3074	429	10.8338	455	9.51749	428	11.1688	558	10.7988	450	12.5964	621	10.8076	452	10.9783	470	9.85994	409	9.73534	446	8.55024	356	10.7435	439	12.5263	538	10.4888	438	9.31611	384	0.582321	-0.0810345	normal	0.650279	0.0642118	normal	0.415735	-0.126089	normal	0.449671	0.116285
HORVU.MOREX.r3.1HG0011180	HORVU.MOREX.r3.1HG0011180	--	9.1312	1483	8.69379	1378	9.18764	1494	8.36447	1265	9.31222	1420	10.0722	1647	9.59521	1740	9.51787	1440	9.78025	1751	10.3061	1566	9.76983	1520	9.56891	1443	11.0837	1845	11.617	1755	10.7388	1593	13.9973	2182	13.3418	2025	14.9264	2232	0.0152964	0.231103	normal	0.0968926	-0.131934	normal	0.711839	0.0367039	normal	0.520767	0.0665503
HORVU.MOREX.r3.1HG0011190	HORVU.MOREX.r3.1HG0011190	--	10.6722	1268	10.7748	1249	10.7344	1276	5.99217	663	5.09296	568	5.16955	618	10.9071	1447	10.9579	1213	11.4673	1501	11.142	1238	10.4443	1188	11.1285	1227	12.8813	1568	12.0812	1335	12.3412	1339	12.9198	1473	14.0982	1565	12.3227	1348	1.18144e-14	-0.785389	normal	0.31993	-0.0863505	normal	0.804459	-0.0275487	normal	8.78638e-16	-0.842863
HORVU.MOREX.r3.1HG0011200	HORVU.MOREX.r3.1HG0011200	--	2.80735	45	1.92237	30	3.24016	52	1.98829	30	1.21085	19	0.735455	12	3.95078	71	3.41716	51	3.46186	61	2.32272	35	2.13412	33	3.68272	55	2.41443	40	3.54199	53	4.78819	70	4.84014	74	3.4049	51	3.59628	53	--	--	--	0.254049	-0.435826	normal	0.38956	-0.328144	normal	--	--
HORVU.MOREX.r3.1HG0011210	HORVU.MOREX.r3.1HG0011210	--	0	0	0	0	0	0	0	0	0	0	0	0	0	0	0	0	0	0	0	0	0	0	0	0	0	0	0	0	0	0	0	0	0	0	0	0	--	--	--	--	--	--	--	--	--	--	--
HORVU.MOREX.r3.1HG0011220	HORVU.MOREX.r3.1HG0011220	--	0	0	0	0	0	0	0	0	0	0	0	0	0	0	0	0	0	0	0	0	0	0	0	0	0	0	0	0	0	0	0	0	0	0	0	0	--	--	--	--	--	--	--	--	--	--	--
HORVU.MOREX.r3.1HG0011240	HORVU.MOREX.r3.1HG0011240	--	0	0	0	0	0	0	0	0	0	0	0	0	0	0	0	0	0	0	0	0	0	0	0	0	0	0	0	0	0	0	0	0	0	0	0	0	--	--	--	--	--	--	--	--	--	--	--
HORVU.MOREX.r3.1HG0011250	HORVU.MOREX.r3.1HG0011250	--	0.872003	99	1.11466	124	0.823253	94	0.989448	105	1.16457	124	1.03656	119	0.595669	76	1.03976	110	0.993502	125	0.983368	105	1.25927	137	1.19987	127	1.38098	161	0.802227	85	0.735902	77	1.03521	113	1.27346	135	1.15979	121	0.172472	0.361546	normal	0.867356	0.0569387	normal	0.236161	0.345828	normal	0.865785	0.0503869
HORVU.MOREX.r3.1HG0011260	HORVU.MOREX.r3.1HG0011260	--	0	0	0	0	0	0	0	0	0	0	0	0	0	0	0	0	0	0	0	0	0	0	0	0	0	0	0	0	0	0	0	0	0	0	0	0	--	--	--	--	--	--	--	--	--	--	--
HORVU.MOREX.r3.1HG0011270	HORVU.MOREX.r3.1HG0011270	--	13.7356	1192	12.0886	1024	11.7993	1026	10.1128	818	10.7602	877	12.8906	1127	10.4388	1012	9.89164	800	9.25553	886	11.0343	896	10.233	851	10.3042	831	10.7203	954	12.0519	974	11.3532	900	12.1317	1011	11.5227	935	10.8794	870	0.786108	0.0377968	normal	0.00192278	0.309155	normal	0.437504	0.0925107	normal	0.0257863	0.258156
HORVU.MOREX.r3.1HG0011280	HORVU.MOREX.r3.1HG0011280	--	0.089794	5	0.290846	13	0.214224	10	0.048218	3	0.047497	2	0	0	0.12061	7	0	0	0	0	0.158053	7	0.093755	5	0	0	3.48961	160	4.34788	181	5.83848	238	10.9838	470	10.125	422	10.4125	428	--	--	--	--	--	--	--	--	--	--	--
HORVU.MOREX.r3.1HG0011290	HORVU.MOREX.r3.1HG0011290	--	0	0	0	0	0	0	0	0	0	0	0	0	0	0	0	0	0	0	0	0	0	0	0	0	0	0	0	0	0	0	0	0	0	0	0	0	--	--	--	--	--	--	--	--	--	--	--
HORVU.MOREX.r3.1HG0011300	HORVU.MOREX.r3.1HG0011300	--	1.90565	17	3.12568	27	4.11839	36	0.322328	3	0.960546	8	0.443401	4	0.285203	3	1.60322	14	1.74053	17	0.748837	7	2.28149	20	3.35012	28	0.809675	8	0.778327	7	1.04211	9	0.681026	6	0.307987	3	1.49266	12	--	--	--	--	--	--	--	--	--	--	--
HORVU.MOREX.r3.1HG0011310	HORVU.MOREX.r3.1HG0011310	--	0	0	0.084045	2	0.167196	5	0	0	0	0	0	0	0	0	0.088641	3	0	0	0	0	0	0	0	0	0.011549	1	0.043488	1	0	0	0	0	0	0	0.005681	1	--	--	--	--	--	--	--	--	--	--	--
HORVU.MOREX.r3.1HG0011330	HORVU.MOREX.r3.1HG0011330	--	0	0	0	0	0	0	0	0	0	0	0	0	0	0	0	0	0	0	0	0	0	0	0	0	0	0	0	0	0.184997	3	0	0	0	0	0	0	--	--	--	--	--	--	--	--	--	--	--
HORVU.MOREX.r3.1HG0011360	HORVU.MOREX.r3.1HG0011360	--	47.6988	2036	55.0548	2294	49.3542	2109	49.6609	1974	49.9437	2002	49.6316	2133	65.467	3121	63.716	2534	59.8855	2818	49.8372	1990	59.3851	2428	55.2624	2190	68.2171	2985	70.8263	2813	71.647	2793	72.5302	2972	68.4343	2730	64.307	2527	0.0455798	0.166403	normal	6.17662e-07	-0.348678	normal	0.00947264	-0.199523	normal	0.824554	0.0223661
HORVU.MOREX.r3.1HG0011370	HORVU.MOREX.r3.1HG0011370	--	4.76251	312	6.46938	414	5.76455	378	4.98528	304	6.80071	418	5.45575	360	3.26835	239	3.91668	239	4.03256	291	4.15353	255	4.50099	283	4.3891	267	3.89378	262	3.48868	213	2.88529	173	4.30003	271	4.90797	301	3.75392	227	0.254464	0.210129	normal	0.00117641	0.553961	normal	0.273914	0.210608	normal	0.00102352	0.557945
HORVU.MOREX.r3.1HG0011380	HORVU.MOREX.r3.1HG0011380	--	13.3909	574	13.642	571	10.9832	471	13.1151	523	10.74	432	10.9353	472	15.3101	733	15.2142	608	16.0639	759	13.0589	524	14.9718	615	14.6283	582	13.8545	609	14.2378	568	13.695	536	19.3831	797	15.0139	602	17.42	687	0.699413	0.0653604	normal	0.00703594	-0.327555	normal	0.341907	-0.125355	normal	0.386637	-0.131465
HORVU.MOREX.r3.1HG0011390	HORVU.MOREX.r3.1HG0011390	--	0	0	0	0	0	0	0.139794	2	0	0	0	0	0.179447	3	0	0	0	0	0.211959	3	0	0	0	0	0	0	0	0	0	0	0	0	0	0	0	0	--	--	--	--	--	--	--	--	--	--	--
HORVU.MOREX.r3.1HG0011400	HORVU.MOREX.r3.1HG0011400	--	0.758044	71	0.501788	46	0.809612	76	0.568464	50	0.758656	67	0.79599	75	0.478621	50	0.461642	40	0.707246	73	0.662266	58	0.827048	74	0.844062	73	0.350792	34	0.450047	39	0.485915	42	0.672279	60	0.331859	29	0.560963	48	0.563903	0.215133	normal	0.483975	0.272847	normal	0.226008	0.413803	normal	0.931902	0.0344246
HORVU.MOREX.r3.1HG0011430	HORVU.MOREX.r3.1HG0011430	--	0	0	0	0	0	0	0	0	0	0	0	0	0	0	0	0	0	0	0	0	0	0	0	0	0	0	0	0	0	0	0	0	0	0	0	0	--	--	--	--	--	--	--	--	--	--	--
HORVU.MOREX.r3.1HG0011440	HORVU.MOREX.r3.1HG0011440	--	2.59378	121	0.945421	43	1.6182	76	1.64085	71	4.51447	197	2.30265	108	0.019339	1	0.052155	3	0.089731	5	0	0	0.238576	11	0.319486	14	0.038487	2	0	0	0	0	0.108725	5	0	0	0.039095	2	0.0303391	0.811348	normal	4.59014e-15	3.71534	up	--	--	--	0.00150791	2.74531
HORVU.MOREX.r3.1HG0011450	HORVU.MOREX.r3.1HG0011450	--	0.919596	89	0.968726	92	0.698203	68	0.867609	78	0.78742	72	1.16812	114	0.784995	85	0.591595	54	0.625847	67	0.989035	90	0.886964	83	0.940439	85	0.558736	56	0.460983	42	0.680384	60	0.918263	86	0.997982	91	0.698257	63	0.340647	0.301387	normal	0.347593	0.307604	normal	0.152638	0.428567	normal	0.640995	0.155126
HORVU.MOREX.r3.1HG0011470	HORVU.MOREX.r3.1HG0011470	--	3.21998	164	4.37409	218	3.89013	199	4.30983	205	2.59571	125	4.746	244	0.122445	7	0.177267	9	0.117273	7	0.422069	21	0.683114	34	0.744402	36	0.046128	3	0.047339	3	0	0	0.122598	6	0.220281	11	0	0	0.424306	0.210588	normal	7.4921e-37	4.25362	up	--	--	--	1.15376e-18	2.70122
HORVU.MOREX.r3.1HG0011490	HORVU.MOREX.r3.1HG0011490	--	0.72986	18	0.80688	19	1.07603	26	1.46853	32	0.814	18	1.65976	39	0.770674	21	0.599404	14	1.20724	32	0.909433	20	1.06831	24	0.727833	16	0.666298	16	1.22702	27	0.74537	16	0.844319	19	1.32221	29	1.05866	23	--	--	--	--	--	--	--	--	--	--	--
HORVU.MOREX.r3.1HG0011500	HORVU.MOREX.r3.1HG0011500	--	0.870259	8	2.81132	23	1.81367	16	1.74242	14	1.84897	15	1.06006	9	0.816695	8	0.945253	8	1.58695	15	1.19008	10	1.39947	12	1.00949	8	0.957194	9	1.73223	14	2.00754	16	1.10312	9	1.57755	13	1.65957	13	--	--	--	--	--	--	--	--	--	--	--
HORVU.MOREX.r3.1HG0011510	HORVU.MOREX.r3.1HG0011510	--	0.1849	16	0.442273	38	0.160962	14	0.140774	12	0.184328	15	0.100121	9	0.297586	29	0.302553	25	0.237939	23	0.515029	42	0.322619	27	0.233626	19	0.271566	24	0.19041	16	0.208044	17	0.131674	11	0.208959	17	0.408841	33	--	--	--	--	--	--	--	--	--	--	--
HORVU.MOREX.r3.1HG0011530	HORVU.MOREX.r3.1HG0011530	--	0	0	0	0	0	0	0	0	0	0	0	0	0	0	0	0	0	0	0	0	0	0	0	0	0	0	0	0	0	0	0	0	0	0	0	0	--	--	--	--	--	--	--	--	--	--	--
HORVU.MOREX.r3.1HG0011540	HORVU.MOREX.r3.1HG0011540	--	0	0	0	0	0.048955	3	0.026317	2	0.179202	7	0.044466	2	0	0	0	0	0	0	0	0	0.101317	4	0	0	0	0	0	0	0	0	0	0	0	0	0.106104	4	--	--	--	--	--	--	--	--	--	--	--
HORVU.MOREX.r3.1HG0011550	HORVU.MOREX.r3.1HG0011550	--	0.090199	2	0	0	0	0	0	0	0	0	0	0	0	0	0	0	0	0	0	0	0	0	0	0	0	0	0	0	0	0	0	0	0	0	0	0	--	--	--	--	--	--	--	--	--	--	--
HORVU.MOREX.r3.1HG0011560	HORVU.MOREX.r3.1HG0011560	--	0.156951	16	0.255902	25	0.178243	18	0.042836	4	0.131575	12	0.26595	26	0.073316	8	0.107872	10	0.179253	19	0.145741	14	0.278581	26	0.217674	20	0.105768	11	0.186296	17	0.112639	10	0.179952	17	0.160641	15	0.186156	17	--	--	--	--	--	--	--	--	--	--	--
HORVU.MOREX.r3.1HG0011570	HORVU.MOREX.r3.1HG0011570	--	0	0	0	0	0.027856	2	0	0	0	0	0	0	0	0	0	0	0	0	0	0	0	0	0	0	0	0	0	0	0	0	0	0	0	0	0	0	--	--	--	--	--	--	--	--	--	--	--
HORVU.MOREX.r3.1HG0011580	HORVU.MOREX.r3.1HG0011580	--	0	0	0	0	0	0	0	0	0	0	0	0	0	0	0	0	0	0	0	0	0	0	0	0	0	0	0	0	0	0	0	0	0	0	0	0	--	--	--	--	--	--	--	--	--	--	--
HORVU.MOREX.r3.1HG0011590	HORVU.MOREX.r3.1HG0011590	--	0.978476	95	1.07894	102	0.717938	70	1.06726	96	1.03534	94	1.5359	150	0.762917	83	0.778335	71	1.02042	109	1.24609	113	1.28483	119	1.2891	116	0.702537	70	1.18133	107	1.18755	105	1.39644	130	1.11885	101	1.25652	112	0.0549669	0.551781	normal	0.843073	0.0682257	normal	0.0517924	0.508086	normal	0.770647	0.0896913
HORVU.MOREX.r3.1HG0011600	HORVU.MOREX.r3.1HG0011600	--	1.29333	15	2.35146	26	0.530876	6	0.286633	3	1.56424	17	0.704102	8	1.99952	26	0.758203	8	1.66927	21	1.13904	12	3.47112	38	1.706	18	0.657655	8	1.0959	12	1.16554	12	1.65771	18	1.92957	21	1.70246	18	--	--	--	--	--	--	--	--	--	--	--
HORVU.MOREX.r3.1HG0011610	HORVU.MOREX.r3.1HG0011610	--	0	0	0	0	0	0	0	0	0	0	0	0	0	0	0	0	0	0	0	0	0	0	0	0	0	0	0	0	0	0	0	0	0	0	0	0	--	--	--	--	--	--	--	--	--	--	--
HORVU.MOREX.r3.1HG0011630	HORVU.MOREX.r3.1HG0011630	--	0	0	0	0	0	0	0	0	0	0	0	0	0	0	0	0	0	0	0	0	0	0	0	0	0	0	0	0	0	0	0	0	0	0	0	0	--	--	--	--	--	--	--	--	--	--	--
HORVU.MOREX.r3.1HG0011640	HORVU.MOREX.r3.1HG0011640	--	0	0	0	0	0	0	0.042008	1	0	0	0	0	0	0	0.042548	2	0	0	0	0	0	0	0	0	0	0	0	0	0.086819	3	0	0	0	0	0	0	--	--	--	--	--	--	--	--	--	--	--
HORVU.MOREX.r3.1HG0011650	HORVU.MOREX.r3.1HG0011650	--	0	0	0	0	0	0	0	0	0	0	0	0	0	0	0	0	0	0	0	0	0	0	0	0	0	0	0	0	0	0	0	0	0	0	0	0	--	--	--	--	--	--	--	--	--	--	--
HORVU.MOREX.r3.1HG0011660	HORVU.MOREX.r3.1HG0011660	--	1.41648	66	2.56078	116	1.27419	59	2.68722	116	0.73129	32	1.81313	85	0.058158	4	0.18829	9	0.199668	11	0.123422	6	0.078965	4	0.166814	8	0.021121	2	0.0076	1	0.011853	1	0.048857	3	0.046324	3	0.015676	1	0.703003	0.173664	normal	2.04531e-11	2.84923	up	--	--	--	--	--
HORVU.MOREX.r3.1HG0011680	HORVU.MOREX.r3.1HG0011680	--	1.00526	127	0.925666	114	0.964216	122	1.17051	138	1.00573	119	0.804868	102	0.981896	139	1.01411	119	0.706203	98	0.769709	91	1.13801	138	1.05929	124	0.714699	93	0.964048	113	1.08357	125	0.911244	111	0.898267	106	0.849166	99	0.408827	0.224881	normal	0.827148	0.0647872	normal	0.703153	0.123528	normal	0.591953	0.164681
HORVU.MOREX.r3.1HG0011690	HORVU.MOREX.r3.1HG0011690	--	1.13056	58	1.25963	63	1.06741	55	1.68584	80	1.04005	50	0.92975	48	0.031667	2	0.088774	5	0	0	0.080799	4	0.108219	6	0.095025	5	0	0	0	0	0	0	0	0	0	0	0	0	0.520786	0.246774	normal	5.03443e-13	3.5312	up	--	--	--	6.60177e-11	3.37194
HORVU.MOREX.r3.1HG0011700	HORVU.MOREX.r3.1HG0011700	--	0.041842	4	0.105824	8	0.090516	7	0.091942	7	0.186663	13	0.105829	8	0.112513	10	0.033882	3	0.105761	9	0.143588	10	0.109801	8	0.158005	11	0.084374	7	0.113595	8	0.105869	8	0.06727	5	0.14946	11	0.156415	11	--	--	--	--	--	--	--	--	--	--	--
HORVU.MOREX.r3.1HG0011720	HORVU.MOREX.r3.1HG0011720	--	0.17582	4	0.359914	8	0.204845	5	0.437894	9	0.048611	1	0.167312	4	0.287822	7	0.051747	1	0.010934	1	0.305529	6	0.314517	7	0.317116	7	0.189401	5	0.123743	3	0.476742	10	0.673926	14	0.628098	13	0.312218	6	--	--	--	--	--	--	--	--	--	--	--
HORVU.MOREX.r3.1HG0011730	HORVU.MOREX.r3.1HG0011730	--	0.034123	3	0.014951	2	0.039892	4	0.13789	11	0.029572	3	0.044268	4	0.060537	6	0.036175	3	0.056029	5	0.083752	7	0.096521	8	0.02925	3	0.008119	1	0.125308	10	0.004029	1	0.08263	7	0.068897	6	0.123818	10	--	--	--	--	--	--	--	--	--	--	--
HORVU.MOREX.r3.1HG0011740	HORVU.MOREX.r3.1HG0011740	--	0	0	0	0	0	0	0	0	0	0	0	0	0	0	0.015668	1	0	0	0	0	0	0	0	0	0	0	0	0	0	0	0	0	0	0	0	0	--	--	--	--	--	--	--	--	--	--	--
HORVU.MOREX.r3.1HG0011760	HORVU.MOREX.r3.1HG0011760	--	0.963335	93	1.23321	117	0.832035	81	0.969133	88	0.822452	75	0.740529	72	0.961106	104	0.812412	74	0.992622	106	1.33825	121	1.13993	106	1.85199	166	1.30132	129	0.910191	82	0.80334	71	1.40319	131	0.966311	88	1.32961	119	0.868512	-0.0580201	normal	0.79435	0.0845454	normal	0.0305101	0.568083	normal	0.0449562	-0.589937
HORVU.MOREX.r3.1HG0011770	HORVU.MOREX.r3.1HG0011770	--	0.082588	3	0.043715	2	0.083048	3	0.043761	1	0	0	0.082041	3	0.0424	2	0.176692	4	0	0	0.043258	1	0	0	0.319308	8	0	0	0.088751	3	0.07868	2	0.086022	3	0.21633	5	0.142625	4	--	--	--	--	--	--	--	--	--	--	--
HORVU.MOREX.r3.1HG0011780	HORVU.MOREX.r3.1HG0011780	--	3.03048	41	3.46828	46	0.940396	13	2.43788	31	0.971765	13	3.12501	42	0.885661	14	1.9404	25	0.974451	15	1.28879	17	1.47974	19	1.225	16	0.856688	12	1.15666	15	1.125	14	2.03152	27	1.81525	23	0.516136	7	0.988522	0.0100351	normal	--	--	--	--	--	--	--	--
HORVU.MOREX.r3.1HG0011790	HORVU.MOREX.r3.1HG0011790	--	4.38826	294	4.14523	271	2.54539	171	3.15708	197	2.98562	188	3.14878	213	3.10313	232	4.45181	278	4.05477	300	3.34464	210	3.04651	196	3.33756	208	5.1955	357	3.75334	234	4.98053	305	3.8979	251	4.33412	272	4.51185	279	0.833198	-0.055241	normal	0.689891	-0.101022	normal	0.269128	-0.237143	normal	0.660929	0.0947124
HORVU.MOREX.r3.1HG0011800	HORVU.MOREX.r3.1HG0011800	--	3.56358	42	4.62805	53	4.15618	49	1.53146	17	1.75724	20	2.95175	35	5.38984	70	3.59199	39	3.49426	45	5.67311	62	3.19596	36	4.44297	48	4.5773	55	3.84273	42	4.41133	47	6.852	76	4.82693	53	5.19312	56	0.117388	-0.674061	normal	0.934691	-0.0359885	normal	0.868084	0.0760424	normal	0.0718583	-0.845807
HORVU.MOREX.r3.1HG0011810	HORVU.MOREX.r3.1HG0011810	--	0.331351	6	0.466661	9	0.252911	5	0.316502	6	0.270047	5	0	0	0.325845	7	0.718497	12	0.671066	14	0.512498	9	0.471313	9	0.374973	7	0.525389	10	0.401891	7	0.416076	7	1.08056	19	1.16753	20	0.415942	7	--	--	--	--	--	--	--	--	--	--	--
HORVU.MOREX.r3.1HG0011820	HORVU.MOREX.r3.1HG0011820	--	2.39369	87	2.81475	100	2.76647	100	2.17034	73	1.69554	58	2.57612	94	2.76289	112	0	0	3.479	139	3.07054	104	2.72237	95	3.96249	133	3.85904	143	4.14422	140	4.08844	135	4.66383	162	3.92633	133	3.96114	132	0.750444	-0.107452	normal	0.881515	0.106498	normal	0.79605	0.105043	normal	0.175248	-0.423702
HORVU.MOREX.r3.1HG0011830	HORVU.MOREX.r3.1HG0011830	--	0	0	0	0	0.017019	1	0	0	0.009962	1	0.045132	1	0.01376	1	0	0	0	0	0	0	0	0	0.048569	1	0	0	0.061747	2	0.008779	1	0	0	0	0	0	0	--	--	--	--	--	--	--	--	--	--	--
HORVU.MOREX.r3.1HG0011840	HORVU.MOREX.r3.1HG0011840	--	0	0	0	0	0	0	0	0	0	0	0	0	0	0	0.055533	1	0	0	0	0	0	0	0	0	0	0	0	0	0.306967	5	0.051479	1	0.251167	5	0	0	--	--	--	--	--	--	--	--	--	--	--
HORVU.MOREX.r3.1HG0011850	HORVU.MOREX.r3.1HG0011850	--	0.718863	9	1.28352	15	0.743366	9	0.213719	3	0.112865	2	0.594203	7	0.3237	5	0.773445	9	0.218977	3	0.690377	8	0.312893	4	0.661319	7	0.482474	6	0.478306	6	0.544123	6	0.354443	4	0.377928	4	0.068421	1	--	--	--	--	--	--	--	--	--	--	--
HORVU.MOREX.r3.1HG0011860	HORVU.MOREX.r3.1HG0011860	--	0.130212	2	0	0	0	0	0.069923	2	0	0	0	0	0.0583	2	0	0	0	0	0.181872	3	0	0	0	0	0.063517	2	0	0	0	0	0	0	0.00743	1	0	0	--	--	--	--	--	--	--	--	--	--	--
HORVU.MOREX.r3.1HG0011870	HORVU.MOREX.r3.1HG0011870	--	2.15856	55	1.44967	36	1.89192	49	2.98697	71	3.39742	81	2.45847	63	0.632378	18	1.14851	28	0.931174	27	1.37132	33	1.8039	44	1.47951	35	2.03998	54	0.597975	15	1.69134	40	0.797957	20	1.98527	48	1.64591	39	0.0166868	0.80244	normal	0.0462797	0.846993	normal	--	--	--	0.00355732	1.04233
HORVU.MOREX.r3.1HG0011880	HORVU.MOREX.r3.1HG0011880	--	0.481656	7	0.67569	9	0.790497	11	0.511434	7	0.470223	6	0	0	1.25308	19	4.77972	60	2.05523	31	3.43343	44	1.48025	20	3.53258	45	41.9526	579	41.647	522	36.0472	443	40.1116	519	35.9155	452	36.2886	450	--	--	--	--	--	--	0.904783	0.0640476	normal	--	--
HORVU.MOREX.r3.1HG0011890	HORVU.MOREX.r3.1HG0011890	--	24.3598	1298	26.1432	1359	27.017	1441	34.9975	1736	33.877	1694	26.9325	1444	21.9719	1307	18.5324	920	23.2449	1365	31.7882	1584	32.9034	1679	36.3189	1796	22.7747	1244	20.7532	1029	21.6574	1054	33.7962	1728	32.4885	1618	33.8775	1662	3.44886e-06	0.495607	normal	0.0154887	0.243591	normal	9.1483e-13	0.651918	normal	0.478108	0.087238
HORVU.MOREX.r3.1HG0011900	HORVU.MOREX.r3.1HG0011900	--	23.0793	1177	23.5577	1173	23.3662	1193	23.3419	1108	25.5803	1225	21.0967	1083	31.8048	1811	32.3573	1537	31.3776	1764	35.3353	1686	36.0974	1763	34.236	1621	36.2797	1896	36.3724	1726	33.7574	1572	42.9485	2102	43.3097	2064	39.7364	1865	0.0650893	0.192474	normal	4.01947e-11	-0.481889	normal	0.059022	0.144552	normal	6.65469e-06	-0.429959
HORVU.MOREX.r3.1HG0011910	HORVU.MOREX.r3.1HG0011910	--	0	0	0	0	0	0	0	0	0	0	0	0	0	0	0	0	0	0	0	0	0	0	0	0	0	0	0	0	0	0	0	0	0	0	0	0	--	--	--	--	--	--	--	--	--	--	--
HORVU.MOREX.r3.1HG0011930	HORVU.MOREX.r3.1HG0011930	--	0	0	0	0	0	0	0	0	0	0	0	0	0	0	0	0	0	0	0	0	0	0	0	0	0	0	0	0	0	0	0	0	0	0	0	0	--	--	--	--	--	--	--	--	--	--	--
HORVU.MOREX.r3.1HG0011960	HORVU.MOREX.r3.1HG0011960	--	2.75933	168	3.48218	206	4.87003	296	0.141799	8	0.244406	14	0.125358	8	0.566785	39	0.155891	9	0.176314	12	0.647514	37	1.45869	85	3.17458	179	0	0	0	0	0	0	0	0	0	0	0	0	8.01682e-31	-3.84013	down	1.4891e-08	2.79453	up	0.0115224	1.04131	up	6.81447e-09	-2.91892
HORVU.MOREX.r3.1HG0011970	HORVU.MOREX.r3.1HG0011970	LOC109757062	0	0	0	0	0	0	0	0	0	0	0	0	0	0	0	0	0	0	0	0	0	0	0	0	0	0	0	0	0	0	0	0	0	0	0	0	--	--	--	--	--	--	--	--	--	--	--
HORVU.MOREX.r3.1HG0011980	HORVU.MOREX.r3.1HG0011980	LOC109757062	0	0	0	0	0	0	0	0	0	0	0	0	0	0	0	0	0	0	0	0	0	0	0	0	0	0	0	0	0	0	0	0	0	0	0	0	--	--	--	--	--	--	--	--	--	--	--
HORVU.MOREX.r3.1HG0012000	HORVU.MOREX.r3.1HG0012000	--	0	0	0	0	0	0	0	0	0	0	0	0	0	0	0	0	0	0	0	0	0	0	0	0	0	0	0	0	0	0	0	0	0	0	0	0	--	--	--	--	--	--	--	--	--	--	--
HORVU.MOREX.r3.1HG0012010	HORVU.MOREX.r3.1HG0012010	--	0	0	0	0	0	0	0	0	0	0	0	0	0	0	0	0	0	0	0	0	0	0	0	0	0	0	0	0	0	0	0	0	0	0	0	0	--	--	--	--	--	--	--	--	--	--	--
HORVU.MOREX.r3.1HG0012020	HORVU.MOREX.r3.1HG0012020	--	18.1559	1443	18.4441	1431	18.3063	1457	11.4453	847	11.0086	822	9.86789	790	16.754	1487	20.1206	1490	20.24	1773	13.3438	992	13.9928	1065	14.0383	1036	18.4873	1506	17.309	1280	19.3635	1405	18.459	1409	15.9498	1185	14.8301	1085	1.9854e-09	-0.566827	normal	0.35659	-0.0913844	normal	5.97669e-07	-0.458617	normal	0.0813727	-0.192061
HORVU.MOREX.r3.1HG0012030	HORVU.MOREX.r3.1HG0012030	--	0	0	0.120204	5	0.04427	2	0.050679	2	0	0	0	0	0.041256	2	0.15348	6	0.094003	5	0.192732	8	0	0	0.100266	4	0.069987	4	0.045741	2	0.077858	3	0.067747	3	0	0	0.129862	5	--	--	--	--	--	--	--	--	--	--	--
HORVU.MOREX.r3.1HG0012040	HORVU.MOREX.r3.1HG0012040	--	0	0	0.046151	1	0.218695	5	0	0	0.047657	1	0	0	0.040339	1	0	0	0.258818	7	0.096307	2	0.094071	2	0.048515	1	0.113973	3	0.188475	4	0.071363	2	0.186745	4	0.067473	2	0.200278	5	--	--	--	--	--	--	--	--	--	--	--
HORVU.MOREX.r3.1HG0012060	HORVU.MOREX.r3.1HG0012060	--	0	0	0	0	0	0	0	0	0.035932	1	0	0	0	0	0	0	0	0	0	0	0	0	0	0	0	0	0	0	0	0	0	0	0	0	0	0	--	--	--	--	--	--	--	--	--	--	--
HORVU.MOREX.r3.1HG0012070	HORVU.MOREX.r3.1HG0012070	LOC109763102	0	0	0	0	0	0	0	0	0	0	0	0	0	0	0	0	0	0	0	0	0	0	0	0	0	0	0.202696	2	0	0	0	0	0	0	0.189588	2	--	--	--	--	--	--	--	--	--	--	--
HORVU.MOREX.r3.1HG0012080	HORVU.MOREX.r3.1HG0012080	--	0	0	0	0	0	0	0	0	0	0	0	0	0	0	0	0	0	0	0	0	0	0	0	0	0	0	0	0	0	0	0	0	0	0	0	0	--	--	--	--	--	--	--	--	--	--	--
HORVU.MOREX.r3.1HG0012090	HORVU.MOREX.r3.1HG0012090	--	0	0	0	0	0	0	0	0	0	0	0	0	0	0	0	0	0	0	0	0	0	0	0	0	0	0	0	0	0	0	0	0	0	0	0	0	--	--	--	--	--	--	--	--	--	--	--
HORVU.MOREX.r3.1HG0012100	HORVU.MOREX.r3.1HG0012100	--	7.72058	478	7.99989	484	8.26126	512	4.58354	265	6.4734	377	5.88457	367	6.86057	475	5.94595	343	6.09538	416	6.56697	381	6.40922	380	7.94658	457	9.14873	581	7.3531	424	8.08466	457	9.67161	575	7.77406	450	8.83361	504	0.0600313	-0.301069	normal	0.0235005	0.303355	normal	0.416742	0.140343	normal	0.45961	-0.139296
HORVU.MOREX.r3.1HG0012110	HORVU.MOREX.r3.1HG0012110	--	0.258861	13	0.735282	35	0.654954	32	0.483581	22	0.098535	5	0.25054	13	0.2824	16	0.155491	7	0.210202	12	0.478792	22	0.287778	14	0.482086	22	0.621284	31	0.880669	40	0.595431	27	0.707451	33	0.68814	31	0.998257	45	--	--	--	--	--	--	--	--	--	--	--
HORVU.MOREX.r3.1HG0012120	HORVU.MOREX.r3.1HG0012120	--	0.196973	3	0.042426	1	0.079552	2	0.171061	2	0.084817	2	0.075946	1	0.063231	1	0.254717	3	0.189764	3	0.091939	2	0.083152	2	0.146376	2	0.063191	1	0.014834	1	0	0	0.109493	2	0.162453	2	0.068045	1	--	--	--	--	--	--	--	--	--	--	--
HORVU.MOREX.r3.1HG0012130	HORVU.MOREX.r3.1HG0012130	--	0	0	0	0	0	0	0	0	0	0	0	0	0	0	0	0	0	0	0	0	0	0	0	0	0	0	0	0	0	0	0	0	0	0	0	0	--	--	--	--	--	--	--	--	--	--	--
HORVU.MOREX.r3.1HG0012140	HORVU.MOREX.r3.1HG0012140	--	0	0	0	0	0	0	0	0	0	0	0	0	0	0	0	0	0	0	0	0	0	0	0	0	0	0	0	0	0	0	0	0	0	0	0	0	--	--	--	--	--	--	--	--	--	--	--
HORVU.MOREX.r3.1HG0012150	HORVU.MOREX.r3.1HG0012150	--	0	0	0	0	0	0	0	0	0	0	0	0	0	0	0	0	0	0	0	0	0	0	0	0	0	0	0	0	0	0	0	0	0	0	0	0	--	--	--	--	--	--	--	--	--	--	--
HORVU.MOREX.r3.1HG0012160	HORVU.MOREX.r3.1HG0012160	--	0	0	0	0	0	0	0	0	0	0	0	0	0	0	0	0	0	0	0	0	0	0	0	0	0	0	0	0	0	0	0	0	0	0	0	0	--	--	--	--	--	--	--	--	--	--	--
HORVU.MOREX.r3.1HG0012170	HORVU.MOREX.r3.1HG0012170	--	0	0	0	0	0	0	0	0	0	0	0	0	0	0	0	0	0	0	0	0	0	0	0	0	0	0	0	0	0	0	0	0	0	0	0	0	--	--	--	--	--	--	--	--	--	--	--
HORVU.MOREX.r3.1HG0012180	HORVU.MOREX.r3.1HG0012180	--	0	0	0	0	0	0	0	0	0	0	0	0	0	0	0	0	0	0	0	0	0	0	0	0	0	0	0	0	0	0	0	0	0	0	0	0	--	--	--	--	--	--	--	--	--	--	--
HORVU.MOREX.r3.1HG0012190	HORVU.MOREX.r3.1HG0012190	--	0	0	0	0	0	0	0	0	0	0	0	0	0	0	0	0	0	0	0	0	0	0	0	0	0	0	0	0	0	0	0	0	0	0	0	0	--	--	--	--	--	--	--	--	--	--	--
HORVU.MOREX.r3.1HG0012220	HORVU.MOREX.r3.1HG0012220	--	0	0	0	0	0	0	0	0	0	0	0	0	0	0	0	0	0	0	0	0	0	0	0	0	0	0	0	0	0	0	0	0	0	0	0	0	--	--	--	--	--	--	--	--	--	--	--
HORVU.MOREX.r3.1HG0012250	HORVU.MOREX.r3.1HG0012250	--	0.745257	66	0.876817	77	0.969318	87	2.52496	204	2.43689	197	1.99799	180	0	0	0.294999	25	0.138837	14	0.095543	8	0.273514	24	0.356006	31	0.246398	23	0.318436	27	0.296647	25	0.647024	56	1.10586	92	0.608873	51	9.35221e-12	1.52621	up	0.100877	1.07048	normal	--	--	--	1.66235e-23	3.23149
HORVU.MOREX.r3.1HG0012260	HORVU.MOREX.r3.1HG0012260	--	0.105599	2	0	0	0.175124	3	0.057256	1	0	0	0	0	0	0	0	0	0	0	0	0	0	0	0	0	0	0	0	0	0	0	0	0	0	0	0	0	--	--	--	--	--	--	--	--	--	--	--
HORVU.MOREX.r3.1HG0012270	HORVU.MOREX.r3.1HG0012270	--	0	0	0	0	0	0	0	0	0	0	0	0	0	0	0	0	0	0	0	0	0	0	0	0	0	0	0	0	0	0	0	0	0	0	0	0	--	--	--	--	--	--	--	--	--	--	--
HORVU.MOREX.r3.1HG0012290	HORVU.MOREX.r3.1HG0012290	--	0	0	0	0	0	0	0	0	0	0	0	0	0	0	0	0	0	0	0	0	0	0	0	0	0	0	0.069388	6	0.033065	3	0	0	0	0	0	0	--	--	--	--	--	--	--	--	--	--	--
HORVU.MOREX.r3.1HG0012300	HORVU.MOREX.r3.1HG0012300	--	0	0	0	0	0	0	0	0	0	0	0	0	0	0	0	0	0	0	0	0	0	0	0	0	0	0	0	0	0	0	0	0	0	0	0	0	--	--	--	--	--	--	--	--	--	--	--
HORVU.MOREX.r3.1HG0012310	HORVU.MOREX.r3.1HG0012310	--	5.02378	206	4.68924	188	3.94676	162	2.93095	112	3.01553	116	2.33106	97	5.89656	270	3.99734	153	4.40708	199	4.87394	187	5.46738	215	5.77733	220	3.00692	127	3.46683	133	2.87609	108	5.08186	200	5.17641	198	4.59685	174	0.0293713	-0.508514	normal	0.683279	-0.100795	normal	0.515524	0.159348	normal	0.000416994	-0.785173
HORVU.MOREX.r3.1HG0012320	HORVU.MOREX.r3.1HG0012320	--	0	0	0	0	0	0	0	0	0	0	0	0	0	0	0	0	0	0	0	0	0	0	0	0	0	0	0	0	0	0	0	0	0	0	0	0	--	--	--	--	--	--	--	--	--	--	--
HORVU.MOREX.r3.1HG0012330	HORVU.MOREX.r3.1HG0012330	--	10.8248	1219	10.9896	1208	9.66657	1090	13.127	1376	12.9867	1373	15.9965	1813	6.49564	817	7.80161	819	7.8228	971	7.24989	764	8.96708	967	8.90063	931	6.30467	728	5.64981	592	5.08131	523	5.66276	612	6.13697	646	6.68961	694	1.4768e-09	0.609087	normal	3.7776e-06	0.470124	normal	0.170212	0.179109	normal	2.06508e-16	0.903343
HORVU.MOREX.r3.1HG0012340	HORVU.MOREX.r3.1HG0012340	--	0.749723	42	0.819265	45	0.614986	35	0.404163	21	0.617433	33	0.647377	37	1.27535	80	0.968544	51	1.03691	64	0.685191	36	0.952749	51	1.324	69	1.55964	89	0.932176	49	1.53696	78	0.826809	45	1.17275	61	0.963684	50	0.728807	-0.164463	normal	0.112775	-0.571401	normal	0.763064	-0.126381	normal	0.175768	-0.61514
HORVU.MOREX.r3.1HG0012350	HORVU.MOREX.r3.1HG0012350	--	0	0	0	0	0	0	0.032481	1	0	0	0	0	0	0	0	0	0	0	0	0	0	0	0	0	0.093776	2	0	0	0	0	0	0	0	0	0	0	--	--	--	--	--	--	--	--	--	--	--
HORVU.MOREX.r3.1HG0012360	HORVU.MOREX.r3.1HG0012360	--	2.28255	36	2.54249	39	3.21517	51	2.6576	39	3.12984	47	4.59138	73	3.42531	61	3.79238	56	2.5989	45	3.36609	50	3.78064	57	2.74638	41	2.21232	36	1.65685	25	2.01575	29	7.48359	113	6.85983	101	6.20291	90	0.188397	0.513543	normal	0.464549	-0.295587	normal	0.973588	0.014769	normal	0.612693	0.217748
HORVU.MOREX.r3.1HG0012370	HORVU.MOREX.r3.1HG0012370	--	0	0	0	0	0	0	0	0	0	0	0	0	0	0	0	0	0	0	0	0	0	0	0	0	0	0	0	0	0	0	0	0	0	0	0	0	--	--	--	--	--	--	--	--	--	--	--
HORVU.MOREX.r3.1HG0012390	HORVU.MOREX.r3.1HG0012390	LOC548265	0.008274	1	0	0	0	0	0	0	0	0	0	0	0.044582	3	0.04028	2	0.015267	1	0	0	0.035143	2	0	0	0	0	0.045213	2	0.041464	2	0	0	0	0	0	0	--	--	--	--	--	--	--	--	--	--	--
HORVU.MOREX.r3.1HG0012400	HORVU.MOREX.r3.1HG0012400	LOC548265	0.007655	1	0.023473	2	0.015552	1	0	0	0	0	0	0	0.090431	6	0.067549	4	0.084661	5	0.060327	3	0.040639	3	0.032451	2	0.054109	3	0.065694	4	0.072454	4	0.044954	3	0	0	0.031705	2	--	--	--	--	--	--	--	--	--	--	--
HORVU.MOREX.r3.1HG0012410	HORVU.MOREX.r3.1HG0012410	LOC548265	0.009939	1	0	0	0	0	0	0	0	0	0	0	0.035689	2	0.048382	2	0.018338	1	0	0	0.042212	2	0	0	0	0	0.054306	2	0.049804	2	0	0	0	0	0.013082	1	--	--	--	--	--	--	--	--	--	--	--
HORVU.MOREX.r3.1HG0012420	HORVU.MOREX.r3.1HG0012420	LOC548265	0.045662	2	0.03952	2	0.038971	2	0	0	0	0	0	0	0.196078	9	0.126054	5	0.150025	7	0.078328	3	0.069509	3	0.071196	3	0.164585	7	0.112885	5	0.198479	8	0.079423	4	0.070286	3	0.035037	2	--	--	--	--	--	--	--	--	--	--	--
HORVU.MOREX.r3.1HG0012430	HORVU.MOREX.r3.1HG0012430	LOC548265	0.065214	3	0.048977	2	0.038264	2	0	0	0	0	0	0	0.280517	13	0.303832	12	0.156023	7	0.119382	5	0.157379	6	0.05076	2	0.215448	9	0.270809	10	0.266801	10	0.042109	2	0.070286	3	0.046014	2	--	--	--	--	--	--	--	--	--	--	--
HORVU.MOREX.r3.1HG0012440	HORVU.MOREX.r3.1HG0012440	--	0	0	0	0	0	0	0	0	0	0	0	0	0	0	0	0	0	0	0	0	0	0	0	0	0	0	0	0	0	0	0	0	0	0	0	0	--	--	--	--	--	--	--	--	--	--	--
HORVU.MOREX.r3.1HG0012450	HORVU.MOREX.r3.1HG0012450	--	0	0	0	0	0	0	0	0	0	0	0	0	0	0	0	0	0	0	0	0	0	0	0	0	0	0	0	0	0	0	0	0	0	0	0	0	--	--	--	--	--	--	--	--	--	--	--
HORVU.MOREX.r3.1HG0012480	HORVU.MOREX.r3.1HG0012480	--	0	0	0	0	0	0	0	0	0	0	0	0	0	0	0	0	0	0	0	0	0	0	0	0	0	0	0	0	0	0	0	0	0	0	0	0	--	--	--	--	--	--	--	--	--	--	--
HORVU.MOREX.r3.1HG0012490	HORVU.MOREX.r3.1HG0012490	--	0	0	0	0	0	0	0	0	0.047286	1	0.23234	2	0.163291	2	0.066375	1	0.095659	1	0	0	0.545122	5	0.287751	3	0.305142	3	0	0	0.236148	2	0.116439	1	0.190006	2	0.150698	2	--	--	--	--	--	--	--	--	--	--	--
HORVU.MOREX.r3.1HG0012500	HORVU.MOREX.r3.1HG0012500	--	0	0	0	0	0	0	0	0	0	0	0	0	0	0	0	0	0	0	0	0	0	0	0	0	0	0	0	0	0	0	0	0	0	0	0	0	--	--	--	--	--	--	--	--	--	--	--
HORVU.MOREX.r3.1HG0012510	HORVU.MOREX.r3.1HG0012510	--	0	0	0	0	0	0	0	0	0	0	0	0	0	0	0	0	0	0	0	0	0	0	0	0	0	0	0	0	0	0	0	0	0	0	0	0	--	--	--	--	--	--	--	--	--	--	--
HORVU.MOREX.r3.1HG0012520	HORVU.MOREX.r3.1HG0012520	--	9.16216	78	7.99498	66	6.08401	52	2.24797	18	2.26383	18	1.07191	10	7.90399	75	8.96271	71	9.41344	88	19.904	157	18.7287	151	12.4173	97	24.049	208	26.368	207	22.8342	176	13.8224	112	10.9834	87	13.8487	108	7.62838e-05	-1.60439	down	0.568132	-0.198843	normal	0.00104873	0.839316	normal	4.75518e-15	-2.86314
HORVU.MOREX.r3.1HG0012530	HORVU.MOREX.r3.1HG0012530	--	0	0	0	0	0	0	0	0	0	0	0	0	0	0	0	0	0	0	0	0	0	0	0	0	0	0	0	0	0	0	0	0	0	0	0	0	--	--	--	--	--	--	--	--	--	--	--
HORVU.MOREX.r3.1HG0012540	HORVU.MOREX.r3.1HG0012540	--	0	0	0.09016	2	0	0	0	0	0.092778	2	0	0	0	0	0	0	0	0	0	0	0	0	0	0	0.174905	5	0	0	0	0	0	0	0	0	0	0	--	--	--	--	--	--	--	--	--	--	--
HORVU.MOREX.r3.1HG0012570	HORVU.MOREX.r3.1HG0012570	LOC732695	0.101141	2	0.198666	4	0.119328	3	26.1453	408	20.1639	317	18.0801	305	0	0	0	0	0	0	0	0	0	0	0	0	0	0	0	0	0	0	0	0	0	0	0	0	1.43602e-62	6.10484	up	--	--	--	--	--	--	5.74032e-36	8.11399
HORVU.MOREX.r3.1HG0012580	HORVU.MOREX.r3.1HG0012580	LOC732694	0	0	0	0	0.109721	2	148.808	2305	128.078	2000	127.331	2132	0	0	0	0	0	0	0	0	0	0	0.127791	2	0	0	0	0	0	0	0	0	0	0	0	0	2.09382e-134	9.23826	up	--	--	--	--	--	--	5.05368e-84	10.0182
HORVU.MOREX.r3.1HG0012590	HORVU.MOREX.r3.1HG0012590	--	0	0	0	0	0	0	0	0	0	0	0	0	0	0	0	0	0	0	0	0	0	0	0	0	0	0	0	0	0	0	0	0	0	0	0	0	--	--	--	--	--	--	--	--	--	--	--
HORVU.MOREX.r3.1HG0012600	HORVU.MOREX.r3.1HG0012600	--	0	0	0	0	0	0	0	0	0	0	0	0	0	0	0	0	0	0	0	0	0	0	0	0	0	0	0	0	0	0	0	0	0	0	0	0	--	--	--	--	--	--	--	--	--	--	--
HORVU.MOREX.r3.1HG0012610	HORVU.MOREX.r3.1HG0012610	--	0	0	0	0	0	0	0	0	0	0	0	0	0	0	0	0	0	0	0	0	0	0	0	0	0	0	0	0	0.061817	2	0	0	0	0	0	0	--	--	--	--	--	--	--	--	--	--	--
HORVU.MOREX.r3.1HG0012620	HORVU.MOREX.r3.1HG0012620	--	101.852	6247	117.975	7039	119.203	7319	218.194	12460	228.11	13136	218.982	13519	710.328	48648	697.471	39853	748.964	50632	1205.35	68966	1209.17	70673	1264.77	72022	638.799	40156	625.101	35603	675.798	37848	757.415	44510	753.065	43167	721.726	40548	6.22954e-71	1.16449	up	0	-2.70094	down	2.01394e-92	0.76445	normal	0	-2.29918
HORVU.MOREX.r3.1HG0012630	HORVU.MOREX.r3.1HG0012630	--	2.55454	178	2.69549	175	2.69421	181	0.724785	51	1.21985	77	0.801794	55	2.02202	154	2.14641	133	2.39988	180	1.60457	109	1.91576	130	1.09289	70	4.76034	340	5.13907	318	4.09741	264	3.95339	263	3.12814	200	2.98081	194	7.10036e-07	-1.24047	down	0.288795	0.234587	normal	0.150639	-0.392523	normal	0.0843276	-0.59484
HORVU.MOREX.r3.1HG0012640	HORVU.MOREX.r3.1HG0012640	--	0	0	0	0	0	0	28.2476	251	21.7526	195	21.5902	208	0	0	0	0	0	0	0	0	0	0	0	0	0.303026	3	0	0	0	0	0.091811	1	0	0	0	0	9.67866e-45	6.50669	up	--	--	--	--	--	--	1.68667e-29	7.53506
HORVU.MOREX.r3.1HG0012650	HORVU.MOREX.r3.1HG0012650	--	0	0	0.18634	6	0	0	0	0	0	0	0	0	0	0	0	0	0	0	0	0	0	0	0	0	0	0	0	0	0	0	0	0	0	0	0	0	--	--	--	--	--	--	--	--	--	--	--
HORVU.MOREX.r3.1HG0012660	HORVU.MOREX.r3.1HG0012660	--	0	0	0	0	0	0	0	0	0	0	0	0	0	0	0	0	0	0	0	0	0	0	0	0	0	0	0	0	0	0	0	0	0	0	0	0	--	--	--	--	--	--	--	--	--	--	--
HORVU.MOREX.r3.1HG0012670	HORVU.MOREX.r3.1HG0012670	--	0.128619	12	0.057037	6	0.229005	21	0.250833	22	0.196508	17	0.311273	29	0.305518	32	0.726677	62	0.551595	56	0.270452	24	0.223847	20	0.05831	5	0.383332	36	0.559445	48	0.564722	48	0.238103	21	0.334306	29	0.388696	33	--	--	--	--	--	--	--	--	--	--	--
HORVU.MOREX.r3.1HG0012680	HORVU.MOREX.r3.1HG0012680	--	0	0	0	0	0	0	0	0	0	0	0	0	0	0	0	0	0	0	0	0	0	0	0	0	0	0	0	0	0	0	0	0	0	0	0	0	--	--	--	--	--	--	--	--	--	--	--
HORVU.MOREX.r3.1HG0012710	HORVU.MOREX.r3.1HG0012710	LOC109755696	2.20752	28	2.84863	36	2.16148	28	0	0	0	0	0	0	0	0	0	0	0	0	0	0	0.090108	2	0	0	0	0	0	0	0	0	0.133189	2	0	0	0	0	--	--	--	--	--	--	--	--	--	--	--
HORVU.MOREX.r3.1HG0012720	HORVU.MOREX.r3.1HG0012720	LOC109755696	1.96113	112	1.49203	83	1.77621	101	0	0	0	0	0	0	0.060613	4	0.021821	2	0	0	0	0	0	0	0	0	0	0	0	0	0.038605	2	0	0	0	0	0	0	8.10223e-23	-5.03173	down	1.18161e-22	4.44107	up	--	--	--	--	--
HORVU.MOREX.r3.1HG0012730	HORVU.MOREX.r3.1HG0012730	--	6.5949	419	6.20478	385	7.92059	504	5.46827	324	5.77844	345	4.8559	311	11.7661	834	11.1494	660	9.73693	682	7.43423	442	8.5094	518	7.53471	444	23.9837	1561	22.5906	1334	25.0274	1451	16.0573	979	16.5477	982	16.6567	974	0.332604	-0.166941	normal	1.99425e-07	-0.680993	normal	0.000138281	-0.463714	normal	0.0126109	-0.377378
HORVU.MOREX.r3.1HG0012740	HORVU.MOREX.r3.1HG0012740	--	0	0	0	0	0	0	0	0	0	0	0.137391	3	0	0	0	0	0	0	0	0	0	0	0	0	0	0	0.052067	1	0	0	0	0	0	0	0	0	--	--	--	--	--	--	--	--	--	--	--
HORVU.MOREX.r3.1HG0012760	HORVU.MOREX.r3.1HG0012760	--	8.85374	307	7.31045	248	10.7479	373	21.0502	680	18.6683	608	16.3794	572	0.090641	4	0	0	0.261685	10	1.62156	53	4.54117	151	2.96716	96	0	0	0	0	0	0	0	0	0	0	0	0	3.6534e-15	1.23018	up	3.52301e-16	4.29421	up	0.000359653	1.3824	up	5.0248e-11	2.63473
HORVU.MOREX.r3.1HG0012780	HORVU.MOREX.r3.1HG0012780	--	0	0	0	0	0	0	0	0	0	0	0	0	0	0	0	0	0	0	0	0	0	0	0	0	0	0	0	0	0	0	0	0	0	0	0	0	--	--	--	--	--	--	--	--	--	--	--
HORVU.MOREX.r3.1HG0012790	HORVU.MOREX.r3.1HG0012790	--	0	0	0	0	0	0	0	0	0	0	0	0	0	0	0	0	0	0	0	0	0	0	0	0	0	0	0	0	0.011369	1	0	0	0	0	0	0	--	--	--	--	--	--	--	--	--	--	--
HORVU.MOREX.r3.1HG0012810	HORVU.MOREX.r3.1HG0012810	--	0.823178	16	1.22938	23	1.22268	23	0.478201	9	0.019075	1	0.017792	1	0.846821	18	0.736642	13	0.92532	19	0.287754	6	0.112205	3	0.235905	5	0.978511	19	1.00663	18	1.66002	29	0.225169	5	0.292987	6	0.152124	3	--	--	--	--	--	--	--	--	--	--	--
HORVU.MOREX.r3.1HG0012820	HORVU.MOREX.r3.1HG0012820	--	0	0	0	0	0	0	0	0	0	0	0	0	0	0	0	0	0	0	0	0	0	0	0	0	0	0	0	0	0	0	0	0	0	0	0	0	--	--	--	--	--	--	--	--	--	--	--
HORVU.MOREX.r3.1HG0012830	HORVU.MOREX.r3.1HG0012830	--	0	0	0	0	0	0	0	0	0	0	0	0	0	0	0	0	0	0	0	0	0	0	0	0	0	0	0	0	0	0	0	0	0	0	0	0	--	--	--	--	--	--	--	--	--	--	--
HORVU.MOREX.r3.1HG0012840	HORVU.MOREX.r3.1HG0012840	--	0.103682	16	0.185405	28	0.105796	16	0.026091	4	0.056968	8	0.072973	11	0.077276	13	0.15056	21	0.131744	22	0.099632	14	0.121009	18	0.043205	7	0.142594	22	0.157884	22	0.172792	24	0.206467	30	0.138443	20	0.130574	18	--	--	--	--	--	--	--	--	--	--	--
HORVU.MOREX.r3.1HG0012850	HORVU.MOREX.r3.1HG0012850	--	0.43533	29	0.738228	48	0.315756	21	0.132148	9	0.080232	5	0.067451	5	0.059813	5	0.076866	5	0.115358	9	0.381482	24	0.312112	20	0.601344	38	0.520244	36	0.128989	8	0.22306	14	0.398501	26	0	0	0.179463	11	--	--	--	--	--	--	--	--	--	--	--
HORVU.MOREX.r3.1HG0012860	HORVU.MOREX.r3.1HG0012860	--	0.014238	1	0.127415	8	0.029699	2	0	0	0	0	0	0	0.249736	18	0.127756	8	0.113964	8	0.066248	4	0.219381	14	0.134167	8	0.115104	8	0.167064	10	0	0	0	0	0.100131	6	0.034112	2	--	--	--	--	--	--	--	--	--	--	--
HORVU.MOREX.r3.1HG0012870	HORVU.MOREX.r3.1HG0012870	--	0.176611	10	0.379131	21	0.355088	20	0.035819	2	0.151688	8	0.069091	4	0.144437	10	0.143949	8	0.122637	8	0.108729	6	0.276726	15	0.446998	24	0.12135	7	0.038136	2	0.109173	6	0	0	0	0	0.211673	11	--	--	--	--	--	--	--	--	--	--	--
HORVU.MOREX.r3.1HG0012880	HORVU.MOREX.r3.1HG0012880	--	0	0	0	0	0	0	0	0	0	0	0	0	0	0	0	0	0	0	0	0	0	0	0	0	0	0	0	0	0	0	0	0	0	0	0	0	--	--	--	--	--	--	--	--	--	--	--
HORVU.MOREX.r3.1HG0012890	HORVU.MOREX.r3.1HG0012890	--	0	0	0	0	0	0	0	0	0	0	0	0	0	0	0	0	0	0	0	0	0	0	0	0	0	0	0	0	0	0	0	0	0	0	0	0	--	--	--	--	--	--	--	--	--	--	--
HORVU.MOREX.r3.1HG0012900	HORVU.MOREX.r3.1HG0012900	--	0	0	0	0	0	0	0	0	0	0	0	0	0	0	0	0	0	0	0	0	0	0	0	0	0	0	0	0	0	0	0	0	0	0	0	0	--	--	--	--	--	--	--	--	--	--	--
HORVU.MOREX.r3.1HG0012910	HORVU.MOREX.r3.1HG0012910	--	0.022188	1	0	0	0	0	0	0	0	0	0	0	0	0	0	0	0	0	0.094869	2	0	0	0.184791	4	0	0	0.023844	1	0	0	0	0	0	0	0.048198	1	--	--	--	--	--	--	--	--	--	--	--
HORVU.MOREX.r3.1HG0012920	HORVU.MOREX.r3.1HG0012920	--	0	0	0	0	0	0	0	0	0	0	0	0	0	0	0	0	0	0	0	0	0	0	0	0	0	0	0	0	0	0	0	0	0	0	0	0	--	--	--	--	--	--	--	--	--	--	--
HORVU.MOREX.r3.1HG0012940	HORVU.MOREX.r3.1HG0012940	--	0	0	0	0	0	0	0	0	0	0	0	0	0	0	0	0	0	0	0	0	0	0	0	0	0	0	0	0	0	0	0	0	0	0	0	0	--	--	--	--	--	--	--	--	--	--	--
HORVU.MOREX.r3.1HG0012950	HORVU.MOREX.r3.1HG0012950	--	0	0	0	0	0	0	0	0	0	0	0	0	0	0	0.038323	2	0	0	0	0	0	0	0.019076	1	0.020571	1	0.02266	1	0	0	0.021963	1	0.089185	4	0	0	--	--	--	--	--	--	--	--	--	--	--
HORVU.MOREX.r3.1HG0012960	HORVU.MOREX.r3.1HG0012960	--	0	0	0	0	0	0	0	0	0	0	0	0	0	0	0	0	0	0	0	0	0	0	0	0	0	0	0	0	0	0	0	0	0	0	0	0	--	--	--	--	--	--	--	--	--	--	--
HORVU.MOREX.r3.1HG0012970	HORVU.MOREX.r3.1HG0012970	--	0	0	0	0	0	0	0	0	0	0	0	0	0	0	0	0	0	0	0	0	0	0	0	0	0	0	0	0	0	0	0	0	0	0	0	0	--	--	--	--	--	--	--	--	--	--	--
HORVU.MOREX.r3.1HG0012980	HORVU.MOREX.r3.1HG0012980	--	0	0	0	0	0	0	0	0	0	0	0	0	0	0	0	0	0	0	0	0	0	0	0	0	0	0	0	0	0	0	0	0	0	0	0	0	--	--	--	--	--	--	--	--	--	--	--
HORVU.MOREX.r3.1HG0012990	HORVU.MOREX.r3.1HG0012990	--	0	0	0	0	0	0	0	0	0	0	0	0	0	0	0	0	0	0	0	0	0	0	0	0	0	0	0	0	0	0	0	0	0	0	0	0	--	--	--	--	--	--	--	--	--	--	--
HORVU.MOREX.r3.1HG0013000	HORVU.MOREX.r3.1HG0013000	--	9.33363	596	7.42509	463	8.03835	514	4.03615	240	4.58357	275	4.91883	316	5.40709	385	4.76425	284	4.84283	341	4.62758	277	5.41949	331	5.00786	297	4.53609	297	4.29218	255	3.98449	232	3.55592	218	2.64432	158	3.94681	232	9.55544e-06	-0.66916	normal	1.20833e-06	0.678936	normal	0.989023	0.00287329	normal	0.966637	0.00864191
HORVU.MOREX.r3.1HG0013020	HORVU.MOREX.r3.1HG0013020	--	2.50686	218	2.29888	195	2.5484	222	3.15889	255	2.78714	227	2.61363	228	1.98119	192	1.57905	128	1.93064	185	1.93295	157	1.8381	153	2.14115	173	2.52697	225	2.09863	170	2.14177	170	3.02429	252	2.54236	206	2.10188	168	0.0328374	0.398957	normal	0.0661341	0.375201	normal	0.717736	0.0968408	normal	0.000455136	0.685889
HORVU.MOREX.r3.1HG0013030	HORVU.MOREX.r3.1HG0013030	--	0	0	0	0	0	0	0	0	0	0	0	0	0	0	0	0	0	0	0	0	0	0	0	0	0	0	0	0	0	0	0	0	0	0	0	0	--	--	--	--	--	--	--	--	--	--	--
HORVU.MOREX.r3.1HG0013050	HORVU.MOREX.r3.1HG0013050	LOC109755670	72.2507	3346	62.562	2828	67.5651	3132	89.4431	3857	97.4724	4238	88.7281	4136	42.9368	2221	38.9352	1680	38.8246	1982	41.992	1819	42.5542	1888	47.3842	2038	28.8901	1372	31.6702	1365	26.1002	1104	38.9993	1734	31.7875	1376	38.8334	1656	1.92741e-17	0.636588	normal	1.10064e-22	0.707483	normal	0.140622	0.126457	normal	1.09405e-61	1.22365
HORVU.MOREX.r3.1HG0013060	HORVU.MOREX.r3.1HG0013060	--	0	0	0.351179	6	0.048528	1	0	0	0	0	0	0	0.109278	3	0	0	0.105771	3	0	0	0.243478	5	0	0	0	0	0.430599	7	0	0	0	0	0	0	0	0	--	--	--	--	--	--	--	--	--	--	--
HORVU.MOREX.r3.1HG0013070	HORVU.MOREX.r3.1HG0013070	--	0.048345	3	0.049527	3	0	0	0.541881	21	0.934499	37	0.234517	10	0	0	0.064341	3	0.131569	6	0.242709	10	0.313967	13	0.295554	12	0	0	0	0	0	0	0.100708	4	0	0	0	0	--	--	--	--	--	--	--	--	--	--	--
HORVU.MOREX.r3.1HG0013080	HORVU.MOREX.r3.1HG0013080	--	0	0	0	0	0	0	0	0	0	0	0	0	0	0	0	0	0	0	0	0	0	0	0	0	0	0	0	0	0	0	0	0	0	0	0	0	--	--	--	--	--	--	--	--	--	--	--
HORVU.MOREX.r3.1HG0013110	HORVU.MOREX.r3.1HG0013110	--	0	0	0	0	0	0	0	0	0	0	0	0	0	0	0	0	0	0	0	0	0	0	0	0	0	0	0	0	0	0	0	0	0	0	0	0	--	--	--	--	--	--	--	--	--	--	--
HORVU.MOREX.r3.1HG0013120	HORVU.MOREX.r3.1HG0013120	--	0	0	0	0	0	0	0	0	0	0	0	0	0	0	0	0	0	0	0	0	0	0	0	0	0	0	0	0	0	0	0	0	0	0	0	0	--	--	--	--	--	--	--	--	--	--	--
HORVU.MOREX.r3.1HG0013140	HORVU.MOREX.r3.1HG0013140	--	0.713096	11	0.239358	4	0	0	0	0	0.210434	3	0.444183	7	1.58064	26	1.8448	25	2.06683	33	1.05404	15	0.283546	4	0.356503	5	6.92441	102	5.64188	75	5.09685	67	3.2031	44	5.16132	69	5.40377	71	--	--	--	--	--	--	--	--	--	--	--
HORVU.MOREX.r3.1HG0013150	HORVU.MOREX.r3.1HG0013150	--	0.203134	4	0.162722	3	0	0	0	0	0	0	0.059466	1	0.55427	11	0.791134	13	0.625234	12	0	0	0	0	0	0	1.20462	21	1.5735	25	0.713197	11	0.24317	4	1.02941	17	0.516679	8	--	--	--	--	--	--	--	--	--	--	--
HORVU.MOREX.r3.1HG0013160	HORVU.MOREX.r3.1HG0013160	--	0.628345	12	0.630916	11	0.910275	17	0	0	0	0	0	0	0	0	0	0	0	0	0	0	0	0	0	0	0	0	0.308921	6	0.177924	3	0	0	0	0	0	0	--	--	--	--	--	--	--	--	--	--	--
HORVU.MOREX.r3.1HG0013170	HORVU.MOREX.r3.1HG0013170	--	21.0304	582	21.4827	580	27.7651	769	0	0	0.355331	10	0.844852	24	9.61513	297	12.8515	332	12.7629	390	11.2011	290	12.5066	332	13.6295	350	9.50138	270	8.85379	228	10.4516	264	5.14936	137	3.90476	101	3.09902	79	0.000284618	-2.23295	down	7.96521e-10	0.945148	normal	0.714844	0.0792893	normal	0.000249356	-3.16152
HORVU.MOREX.r3.1HG0013180	HORVU.MOREX.r3.1HG0013180	--	39.2637	3238	36.816	3071	35.9831	3028	13.4161	1239	14.2593	1285	11.8126	1165	34.5797	3265	33.7732	2656	35.3474	3267	16.5597	1298	15.2214	1233	14.8571	1182	22.5561	1645	22.1422	1442	22.9783	1481	8.90705	628	8.90034	595	8.88449	576	6.23616e-40	-1.08756	down	0.272218	0.0705438	normal	4.55845e-69	-1.13775	down	0.236194	0.128875
HORVU.MOREX.r3.1HG0013210	HORVU.MOREX.r3.1HG0013210	--	0	0	0	0	0	0	0.426297	6	0.40596	5	0.241831	4	0	0	0	0	0	0	0	0	0	0	0	0	0	0	0	0	0	0	0	0	0	0	0	0	--	--	--	--	--	--	--	--	--	--	--
HORVU.MOREX.r3.1HG0013220	HORVU.MOREX.r3.1HG0013220	--	103.227	5278	110.516	5516	103.15	5280	123.2	5865	127.105	6102	107.809	5549	118.099	6743	115.788	5516	118.673	6688	122.853	5876	118.924	5823	124.166	5895	123.251	6459	123.734	5887	125.628	5866	122.229	6000	121.888	5825	123.221	5800	5.78416e-07	0.369372	normal	9.85772e-05	-0.189535	normal	0.335408	0.0531174	normal	0.0924585	0.132096
HORVU.MOREX.r3.1HG0013230	HORVU.MOREX.r3.1HG0013230	--	0	0	0	0	0	0	0	0	0	0	0	0	0	0	0	0	0	0	0	0	0	0	0	0	0	0	0	0	0	0	0	0	0	0	0	0	--	--	--	--	--	--	--	--	--	--	--
HORVU.MOREX.r3.1HG0013240	HORVU.MOREX.r3.1HG0013240	--	0	0	0	0	0	0	0	0	0	0	0	0	0	0	0	0	0	0	0	0	0	0	0	0	0	0	0	0	0	0	0	0	0	0	0	0	--	--	--	--	--	--	--	--	--	--	--
HORVU.MOREX.r3.1HG0013250	HORVU.MOREX.r3.1HG0013250	--	0	0	0	0	0	0	0	0	0	0	0	0	0	0	0	0	0	0	0	0	0	0	0	0	0	0	0	0	0	0	0	0	0	0	0	0	--	--	--	--	--	--	--	--	--	--	--
HORVU.MOREX.r3.1HG0013260	HORVU.MOREX.r3.1HG0013260	--	0	0	0	0	0	0	0	0	0	0	0	0	0	0	0	0	0	0	0	0	0	0	0	0	0	0	0	0	0	0	0	0	0	0	0	0	--	--	--	--	--	--	--	--	--	--	--
HORVU.MOREX.r3.1HG0013270	HORVU.MOREX.r3.1HG0013270	--	0	0	0.146205	2	0	0	3.48486	46	1.75854	24	2.08161	30	0.670913	11	0.872572	12	1.1738	19	2.34317	31	1.61326	22	2.54826	34	0	0	0.076681	1	0.05678	1	0.062431	1	0.305366	4	0	0	--	--	--	--	--	--	--	--	--	--	--
HORVU.MOREX.r3.1HG0013280	HORVU.MOREX.r3.1HG0013280	--	1.77813	44	1.58558	38	1.68929	41	1.35945	31	2.13444	49	1.25167	31	4.28565	116	4.55321	103	5.42278	145	4.69833	107	4.24633	99	6.60318	149	3.06764	77	2.02175	46	2.51293	56	2.65836	62	3.44303	78	2.21741	50	0.84992	0.0896666	normal	5.32551e-07	-1.42911	down	0.726227	0.113328	normal	8.66022e-06	-1.48692
HORVU.MOREX.r3.1HG0013290	HORVU.MOREX.r3.1HG0013290	--	0.064691	2	0.022091	1	0	0	0	0	0	0	0	0	0.014433	1	0.007481	1	0	0	0	0	0.011553	1	0	0	0.084361	2	0.010182	1	0.133866	3	0.271394	6	0.007457	1	0.053229	1	--	--	--	--	--	--	--	--	--	--	--
HORVU.MOREX.r3.1HG0013300	HORVU.MOREX.r3.1HG0013300	--	12.9298	709	10.7477	576	13.8872	763	13.1655	673	11.0162	568	14.1908	784	10.4598	641	10.582	541	11.962	723	11.1748	574	11.4398	601	12.7978	652	10.1057	568	12.3533	631	11.7227	587	17.484	921	15.7937	810	16.8106	849	0.127817	0.221677	normal	0.281035	0.150573	normal	0.497075	0.0984825	normal	0.0370427	0.277822
HORVU.MOREX.r3.1HG0013310	HORVU.MOREX.r3.1HG0013310	--	272.97	5774	264.692	5466	298.456	6320	344.742	6790	316.474	6286	263.124	5603	3.07252	73	1.12856	23	2.12189	50	37.6772	746	54.018	1095	45.991	904	0	0	0.047756	1	0	0	0.048367	1	0	0	0	0	0.00030142	0.336988	normal	1.68782e-80	6.35115	up	7.31316e-29	3.42666	up	7.34021e-51	2.87603
HORVU.MOREX.r3.1HG0013330	HORVU.MOREX.r3.1HG0013330	--	223.192	2703	225.887	2670	258.735	3137	153.001	1725	85.35	971	98.662	1203	0.467885	7	1.89226	22	0.639992	9	5.24773	60	3.73671	44	0.817494	10	0	0	0.082834	1	0	0	0.070538	1	0	0	0	0	0.00408483	-0.826094	normal	3.61758e-61	6.6488	up	--	--	--	2.21401e-13	4.52156
HORVU.MOREX.r3.1HG0013340	HORVU.MOREX.r3.1HG0013340	--	7.25598	88	6.98964	83	6.94726	85	5.7996	66	5.80206	66	3.34301	41	0	0	0	0	0.245075	4	2.34632	27	2.47138	29	2.0209	23	0	0	0	0	0	0	0	0	0	0	0	0	0.406011	-0.290127	normal	8.61039e-21	4.47015	up	--	--	--	0.00346007	1.21383
HORVU.MOREX.r3.1HG0013350	HORVU.MOREX.r3.1HG0013350	--	0	0	0	0	0	0	0	0	0	0	0	0	0	0	0	0	0	0	0	0	0	0	0	0	0	0	0	0	0	0	0	0	0	0	0	0	--	--	--	--	--	--	--	--	--	--	--
HORVU.MOREX.r3.1HG0013380	HORVU.MOREX.r3.1HG0013380	--	0	0	0.284963	5	0.317447	5	0	0	0.2066	4	0	0	0	0	0	0	0	0	0	0	0	0	0	0	0	0	0	0	0	0	0	0	0	0	0	0	--	--	--	--	--	--	--	--	--	--	--
HORVU.MOREX.r3.1HG0013390	HORVU.MOREX.r3.1HG0013390	--	0	0	0	0	0	0	0	0	0	0	0	0	0	0	0	0	0	0	0	0	0	0	0	0	0	0	0	0	0	0	0	0	0	0	0	0	--	--	--	--	--	--	--	--	--	--	--
HORVU.MOREX.r3.1HG0013400	HORVU.MOREX.r3.1HG0013400	--	449.093	5539	394.844	4754	539.181	6657	814.704	9356	678.197	7854	621.013	7710	0.510204	8	1.33446	16	2.34505	32	52.9843	612	90.5725	1070	72.3023	828	0	0	0	0	0	0	0	0	0	0	0	0	3.87697e-05	0.785593	normal	1.04492e-58	6.88421	up	2.42091e-23	3.51996	up	1.11935e-41	3.38569
HORVU.MOREX.r3.1HG0013410	HORVU.MOREX.r3.1HG0013410	--	0	0	0	0	0	0	0	0	0	0	0	0	0	0	0	0	0	0	0	0	0	0	0	0	0	0	0	0	0	0	0	0	0	0	0	0	--	--	--	--	--	--	--	--	--	--	--
HORVU.MOREX.r3.1HG0013420	HORVU.MOREX.r3.1HG0013420	--	2.00017	40	1.50252	29	1.22172	24	1.28642	24	1.26446	24	0.618502	13	0	0	0	0	0	0	0.574606	11	0.70708	14	0.612949	12	0	0	0	0	0	0	0	0	0	0	0	0	--	--	--	--	--	--	--	--	--	--	--
HORVU.MOREX.r3.1HG0013430	HORVU.MOREX.r3.1HG0013430	--	0	0	0	0	0	0	0	0	0	0	0	0	0	0	0	0	0	0	0	0	0	0	0	0	0	0	0	0	0	0	0	0	0	0	0	0	--	--	--	--	--	--	--	--	--	--	--
HORVU.MOREX.r3.1HG0013440	HORVU.MOREX.r3.1HG0013440	--	0	0	0	0	0	0	0	0	0	0	0	0	0	0	0	0	0	0	0	0	0	0	0	0	0	0	0	0	0	0	0	0	0	0	0	0	--	--	--	--	--	--	--	--	--	--	--
HORVU.MOREX.r3.1HG0013450	HORVU.MOREX.r3.1HG0013450	--	30.4515	369	25.4168	301	33.6071	408	49.2602	556	38.5924	439	35.978	439	0	0	0.258833	3	0.585882	8	6.05433	69	8.17334	95	7.36039	83	0	0	0	0	0	0	0	0	0	0	0	0	7.93841e-05	0.649143	normal	2.01121e-60	5.84487	up	3.33873e-18	3.00486	up	2.92111e-43	2.64787
HORVU.MOREX.r3.1HG0013460	HORVU.MOREX.r3.1HG0013460	--	0	0	0.663495	8	0.286196	4	4.85102	51	4.2944	46	4.27619	49	4.13517	52	2.82348	30	3.56834	45	5.35514	57	8.26064	89	4.19843	44	3.82936	45	5.91082	62	2.95032	31	9.56781	103	11.1726	118	11.9559	124	7.42897e-10	2.98351	up	--	--	--	0.0923957	0.59492	normal	0.587375	-0.229855
HORVU.MOREX.r3.1HG0013470	HORVU.MOREX.r3.1HG0013470	--	0	0	0	0	0	0	0	0	0	0	0	0	0	0	0	0	0	0	0	0	0	0	0	0	0	0	0	0	0	0	0	0	0	0	0	0	--	--	--	--	--	--	--	--	--	--	--
HORVU.MOREX.r3.1HG0013480	HORVU.MOREX.r3.1HG0013480	--	133.779	1620	135.413	1601	181.428	2200	287.192	3238	241.709	2749	208.714	2545	0.987539	14	1.22582	14	0.368111	5	17.6396	200	28.1897	327	23.6358	266	0.115755	2	0	0	0.063908	1	0	0	0	0	0	0	3.94869e-05	0.876518	normal	1.87687e-97	6.73657	up	6.63639e-49	3.9278	up	8.39238e-51	3.50903
HORVU.MOREX.r3.1HG0013490	HORVU.MOREX.r3.1HG0013490	--	165.117	3660	170.852	3696	228.144	5062	315.214	6505	263.674	5487	247.79	5528	1.15035	29	1.15129	24	0.64467	16	25.1298	521	33.7737	717	38.0525	784	0	0	0	0	0	0	0.037537	1	0	0	0	0	0.000340078	0.724545	normal	3.97086e-158	7.10544	up	5.47866e-109	4.56856	up	2.4235e-56	3.21247
HORVU.MOREX.r3.1HG0013510	HORVU.MOREX.r3.1HG0013510	--	495.264	5997	504.748	5966	635.413	7703	1004	11320	824.824	9378	800.739	9761	2.24246	31	2.55452	29	2.59786	35	87.1739	988	108.635	1260	126.644	1424	0	0	0	0	0.046575	1	0.094395	2	0.080111	1	0	0	5.03318e-07	0.861184	normal	0	7.58223	up	2.68584e-186	5.08483	up	1.35993e-62	3.15518
HORVU.MOREX.r3.1HG0013540	HORVU.MOREX.r3.1HG0013540	--	815.243	9872	804.722	9512	1037.98	12582	1124.48	12678	1004.41	11420	989.357	12060	3.73769	51	3.08496	35	0.835918	12	89.1983	1011	133.173	1545	67.5548	760	0	0	0	0	0.045972	1	0.129377	2	0.092835	2	0	0	4.76913e-06	0.421552	normal	1.84191e-53	6.82674	up	5.87748e-15	2.89328	up	1.9165e-32	3.48866
HORVU.MOREX.r3.1HG0013570	HORVU.MOREX.r3.1HG0013570	--	504.43	6108	520.197	6149	647.16	7845	1215.28	13702	975.143	11087	955.813	11651	2.13136	29	4.25757	49	1.52839	21	90.8842	1030	122.554	1422	97.6993	1099	0	0	0	0	0	0	0	0	0	0	0	0	4.76572e-10	1.08254	up	9.32294e-80	6.82634	up	1.24639e-36	3.97064	up	2.37301e-80	3.46358
HORVU.MOREX.r3.1HG0013580	HORVU.MOREX.r3.1HG0013580	--	0	0	0	0	0	0	0	0	0	0	0	0	0	0	0	0	0	0	0	0	0	0	0	0	0	0	0	0	0	0	0	0	0	0	0	0	--	--	--	--	--	--	--	--	--	--	--
HORVU.MOREX.r3.1HG0013590	HORVU.MOREX.r3.1HG0013590	--	323.073	3949	282.045	3365	396.07	4846	557.434	6343	475.707	5459	430.287	5294	1.33606	19	2.64304	31	1.69748	23	55.1279	631	92.4968	1083	64.1235	728	0	0	0	0	0	0	0	0	0	0	0	0	0.000243524	0.721727	normal	3.37649e-145	6.96737	up	3.98624e-50	4.21309	up	6.50774e-29	2.88862
HORVU.MOREX.r3.1HG0013610	HORVU.MOREX.r3.1HG0013610	--	0	0	0	0	0	0	0	0	0	0	0	0	0	0	0	0	0	0	0	0	0	0	0	0	0	0	0	0	0	0	0	0	0	0	0	0	--	--	--	--	--	--	--	--	--	--	--
HORVU.MOREX.r3.1HG0013620	HORVU.MOREX.r3.1HG0013620	--	0	0	0	0	0	0	0	0	0	0	0	0	0	0	0	0	0	0	0	0	0	0	0	0	0	0	0	0	0	0	0	0	0	0	0	0	--	--	--	--	--	--	--	--	--	--	--
HORVU.MOREX.r3.1HG0013630	HORVU.MOREX.r3.1HG0013630	--	0	0	0	0	0	0	0	0	0	0	0	0	0	0	0	0	0	0	0	0	0	0	0	0	0	0	0	0	0	0	0	0	0	0	0	0	--	--	--	--	--	--	--	--	--	--	--
HORVU.MOREX.r3.1HG0013640	HORVU.MOREX.r3.1HG0013640	--	0	0	0	0	0	0	0	0	0	0	0	0	0	0	0	0	0	0	0	0	0	0	0	0	0	0	0	0	0	0	0	0	0	0	0	0	--	--	--	--	--	--	--	--	--	--	--
HORVU.MOREX.r3.1HG0013650	HORVU.MOREX.r3.1HG0013650	--	0	0	0	0	0	0	0	0	0	0	0	0	0	0	0	0	0	0	0	0	0	0	0	0	0	0	0	0	0	0	0	0	0	0	0	0	--	--	--	--	--	--	--	--	--	--	--
HORVU.MOREX.r3.1HG0013690	HORVU.MOREX.r3.1HG0013690	--	6.85456	564	6.50985	523	6.99608	577	8.08025	619	6.52903	505	8.37584	694	5.4213	498	5.57299	428	5.33181	484	6.04157	465	5.22912	412	5.55424	425	6.65264	561	6.28511	482	6.5233	491	8.05605	637	8.07772	622	7.41434	562	0.00627072	0.364509	normal	0.0224592	0.280899	normal	0.812208	0.0420489	normal	9.33789e-06	0.609486
HORVU.MOREX.r3.1HG0013700	HORVU.MOREX.r3.1HG0013700	--	7.92296	214	6.93423	183	6.20589	168	6.78572	171	5.37864	137	4.60815	126	6.43412	194	4.58059	116	7.22517	215	5.50511	139	5.50551	143	6.32714	159	4.96916	138	4.29126	108	4.02644	100	7.47036	194	5.84628	148	5.99472	149	0.6266	-0.126171	normal	0.519155	0.161696	normal	0.814743	-0.0706589	normal	0.670094	0.116626
HORVU.MOREX.r3.1HG0013710	HORVU.MOREX.r3.1HG0013710	--	0	0	0	0	0	0	0	0	0	0	0	0	0	0	0	0	0	0	0	0	0	0	0	0	0	0	0	0	0	0	0	0	0	0	0	0	--	--	--	--	--	--	--	--	--	--	--
HORVU.MOREX.r3.1HG0013750	HORVU.MOREX.r3.1HG0013750	--	0	0	0	0	0	0	0	0	0	0	0	0	0	0	0	0	0	0	0	0	0	0	0	0	0.023143	1	0	0	0	0	0	0	0	0	0	0	--	--	--	--	--	--	--	--	--	--	--
HORVU.MOREX.r3.1HG0013760	HORVU.MOREX.r3.1HG0013760	--	0	0	0	0	0	0	0	0	0	0	0	0	0	0	0	0	0	0	0	0	0	0	0	0	0	0	0	0	0	0	0	0	0	0	0	0	--	--	--	--	--	--	--	--	--	--	--
HORVU.MOREX.r3.1HG0013770	HORVU.MOREX.r3.1HG0013770	--	0	0	0	0	0	0	0	0	0	0	0	0	0	0	0	0	0	0	0	0	0	0	0	0	0	0	0	0	0	0	0	0	0.06023	2	0	0	--	--	--	--	--	--	--	--	--	--	--
HORVU.MOREX.r3.1HG0013780	HORVU.MOREX.r3.1HG0013780	--	0	0	0	0	0	0	0	0	0	0	0	0	0	0	0	0	0	0	0	0	0	0	0	0	0	0	0	0	0	0	0	0	0	0	0	0	--	--	--	--	--	--	--	--	--	--	--
HORVU.MOREX.r3.1HG0013790	HORVU.MOREX.r3.1HG0013790	--	0	0	0	0	0	0	0	0	0	0	0	0	0	0	0	0	0	0	0	0	0	0	0	0	0	0	0	0	0	0	0	0	0	0	0	0	--	--	--	--	--	--	--	--	--	--	--
HORVU.MOREX.r3.1HG0013800	HORVU.MOREX.r3.1HG0013800	--	25.8493	1866	25.89	1824	24.8208	1794	26.9296	1810	25.5735	1733	23.6332	1717	41.2869	3328	39.8279	2678	42.2951	3365	42.77	2888	38.1	2634	38.1671	2558	49.752	3681	52.6229	3534	49.9251	3291	51.5949	3575	49.7358	3355	48.0683	3194	0.0338766	0.184957	normal	7.91751e-33	-0.722773	normal	0.545665	-0.0518784	normal	1.37401e-08	-0.480724
HORVU.MOREX.r3.1HG0013820	HORVU.MOREX.r3.1HG0013820	--	11.3763	1050	10.3618	913	10.4988	958	11.3754	959	11.6419	987	11.0462	1006	10.1169	1031	11.3142	957	10.0713	1006	10.9618	934	10.8431	943	9.58231	814	21.871	2032	22.048	1858	21.359	1804	23.5127	2036	25.5552	2158	25.0446	2098	0.0108524	0.258057	normal	0.965915	0.00515167	normal	0.997171	-0.000463592	normal	0.00987282	0.268942
HORVU.MOREX.r3.1HG0013830	HORVU.MOREX.r3.1HG0013830	--	0	0	0	0	0	0	0	0	0	0	0	0	0	0	0	0	0	0	0	0	0	0	0	0	0	0	0	0	0	0	0	0	0.219314	3	0	0	--	--	--	--	--	--	--	--	--	--	--
HORVU.MOREX.r3.1HG0013840	HORVU.MOREX.r3.1HG0013840	--	0	0	0	0	0	0	0	0	0	0	0	0	0	0	0	0	0	0	0	0	0	0	0	0	0	0	0	0	0	0	0	0	0	0	0	0	--	--	--	--	--	--	--	--	--	--	--
HORVU.MOREX.r3.1HG0013850	HORVU.MOREX.r3.1HG0013850	--	0	0	0	0	0	0	0	0	0	0	0	0	0	0	0	0	0	0	0	0	0	0	0	0	0	0	0	0	0	0	0	0	0	0	0	0	--	--	--	--	--	--	--	--	--	--	--
HORVU.MOREX.r3.1HG0013860	HORVU.MOREX.r3.1HG0013860	--	0	0	0	0	0	0	0	0	0	0	0	0	0	0	0.102001	2	0	0	0.085128	2	0	0	0	0	0.095305	2	0	0	0	0	0	0	0	0	0	0	--	--	--	--	--	--	--	--	--	--	--
HORVU.MOREX.r3.1HG0013880	HORVU.MOREX.r3.1HG0013880	--	2.18718	27	2.99997	37	2.90244	36	0	0	0	0	0	0	0	0	0	0	0	0	0	0	0	0	0	0	0	0	0	0	0	0	0.090088	2	0	0	0	0	--	--	--	--	--	--	--	--	--	--	--
HORVU.MOREX.r3.1HG0013890	HORVU.MOREX.r3.1HG0013890	--	1.46281	23	0.913781	14	0.876461	14	0	0	0	0	0	0	0	0	0	0	0	0	0	0	0	0	0	0	0	0	0	0	0	0	0	0	0	0	0	0	--	--	--	--	--	--	--	--	--	--	--
HORVU.MOREX.r3.1HG0013900	HORVU.MOREX.r3.1HG0013900	--	0	0	0	0	0	0	0	0	0	0	0	0	0	0	0	0	0	0	0	0	0	0	0	0	0	0	0	0	0	0	0	0	0	0	0	0	--	--	--	--	--	--	--	--	--	--	--
HORVU.MOREX.r3.1HG0013910	HORVU.MOREX.r3.1HG0013910	--	0	0	0	0	0	0	0	0	0	0	0	0	0	0	0	0	0	0	0	0	0	0	0	0	0	0	0	0	0	0	0	0	0	0	0	0	--	--	--	--	--	--	--	--	--	--	--
HORVU.MOREX.r3.1HG0013920	HORVU.MOREX.r3.1HG0013920	--	10.3594	387	9.17083	335	11.9249	446	5.05225	176	6.19946	218	4.21592	159	0.780957	33	0.325626	12	0.097033	4	2.55663	90	3.53484	127	2.83716	99	0	0	0	0	0	0	0	0	0	0	0	0	1.41731e-05	-0.809622	normal	2.1343e-10	3.36045	up	8.68013e-10	2.07422	up	0.000132082	0.933428
HORVU.MOREX.r3.1HG0013940	HORVU.MOREX.r3.1HG0013940	--	0	0	0	0	0	0	0	0	0	0	0	0	0	0	0	0	0	0	0	0	0	0	0	0	0	0	0	0	0	0	0	0	0	0	0	0	--	--	--	--	--	--	--	--	--	--	--
HORVU.MOREX.r3.1HG0013950	HORVU.MOREX.r3.1HG0013950	--	0	0	0	0	0	0	0	0	0	0	0	0	0	0	0	0	0	0	0	0	0	0	0	0	0	0	0	0	0	0	0	0	0	0	0	0	--	--	--	--	--	--	--	--	--	--	--
HORVU.MOREX.r3.1HG0013960	HORVU.MOREX.r3.1HG0013960	--	0	0	0	0	0	0	0	0	0	0	0	0	0	0	0	0	0	0	0	0	0	0	0	0	0	0	0	0	0	0	0	0	0	0	0	0	--	--	--	--	--	--	--	--	--	--	--
HORVU.MOREX.r3.1HG0013970	HORVU.MOREX.r3.1HG0013970	--	4.43407	59	7.60891	99	5.75613	77	5.01051	62	5.34009	67	4.01021	54	4.74215	71	4.57354	57	6.16323	90	6.8459	85	7.72612	98	5.62951	70	9.96966	136	9.40532	116	8.54541	104	10.8398	138	9.423	117	10.1727	124	0.781844	-0.105971	normal	0.677615	0.151154	normal	0.304175	0.327276	normal	0.36035	-0.316262
HORVU.MOREX.r3.1HG0013980	HORVU.MOREX.r3.1HG0013980	LOC109734299	6.50921	106	3.45545	55	4.6991	76	2.82748	43	3.39473	52	4.16419	68	3.82917	70	4.61722	70	4.31807	77	4.29466	65	5.77967	90	4.03382	61	6.86163	114	6.94233	105	7.82071	116	8.9712	140	6.91094	105	8.41217	126	0.459028	-0.278034	normal	0.673843	0.154536	normal	0.740462	0.123468	normal	0.483412	-0.267355
HORVU.MOREX.r3.1HG0014000	HORVU.MOREX.r3.1HG0014000	--	5.68451	70	7.35719	88	6.61941	81	5.87536	67	6.27249	72	6.97479	86	9.51446	130	11.24	128	9.00406	122	9.23173	106	9.46196	111	7.90201	90	4.77532	60	3.89355	45	4.31605	49	6.71149	79	9.30316	107	8.5316	96	0.666754	0.143979	normal	0.0223251	-0.602485	normal	0.633877	-0.143047	normal	0.308724	-0.309155
HORVU.MOREX.r3.1HG0014090	HORVU.MOREX.r3.1HG0014090	--	0.077549	4	0.066699	4	0.203632	10	0	0	0	0	0	0	0	0	0	0	0.289272	15	0.392819	17	0.394878	18	0.742609	32	0	0	0	0	0	0	0	0	0	0	0	0	--	--	--	--	--	--	--	--	--	--	--
HORVU.MOREX.r3.1HG0014100	HORVU.MOREX.r3.1HG0014100	--	2.44596	340	2.61045	354	2.78099	386	0.807624	105	0.741388	97	1.03922	146	1.28107	199	1.60637	208	1.14934	176	0.995441	130	0.945664	126	0.764641	99	1.69545	241	2.13477	276	1.50173	191	1.01968	136	0.897435	117	0.729466	94	1.90737e-13	-1.36138	down	1.17997e-07	0.905699	normal	0.0221543	-0.523885	normal	0.748197	0.0974652
HORVU.MOREX.r3.1HG0014110	HORVU.MOREX.r3.1HG0014110	--	0	0	0	0	0	0	0	0	0	0	0	0	0	0	0	0	0	0	0	0	0	0	0	0	0	0	0	0	0	0	0	0	0	0	0	0	--	--	--	--	--	--	--	--	--	--	--
HORVU.MOREX.r3.1HG0014120	HORVU.MOREX.r3.1HG0014120	--	0.552033	37	0.573712	37	1.30042	86	1.65154	102	1.4053	88	0.746039	50	1.13401	84	1.4212	88	1.15918	85	0.554688	35	0.903473	58	0.812725	50	0	0	0	0	0	0	0.07834	5	0.032403	2	0	0	0.0553967	0.756182	normal	0.113659	-0.590562	normal	0.0621081	-0.588232	normal	0.0251399	0.862638
HORVU.MOREX.r3.1HG0014130	HORVU.MOREX.r3.1HG0014130	--	0	0	0	0	0	0	0	0	0	0	0	0	0	0	0	0	0	0	0	0	0	0	0	0	0	0	0	0	0	0	0	0	0	0	0	0	--	--	--	--	--	--	--	--	--	--	--
HORVU.MOREX.r3.1HG0014140	HORVU.MOREX.r3.1HG0014140	--	0	0	0	0	0	0	0	0	0	0	0	0	0	0	0	0	0	0	0	0	0	0	0	0	0	0	0	0	0	0	0	0	0	0	0	0	--	--	--	--	--	--	--	--	--	--	--
HORVU.MOREX.r3.1HG0014150	HORVU.MOREX.r3.1HG0014150	--	1.50146	21	1.65267	23	0.557102	8	1.13768	15	1.89632	25	2.22606	32	1.08427	17	1.23114	16	0.993163	16	2.13191	28	1.01091	14	1.59427	21	1.58877	23	1.79386	24	1.34062	18	2.43247	33	1.56787	21	2.511	33	--	--	--	--	--	--	--	--	--	--	--
HORVU.MOREX.r3.1HG0014160	HORVU.MOREX.r3.1HG0014160	--	2.22156	50	2.62255	58	2.11014	48	2.6404	56	2.00977	43	2.79605	64	2.33648	59	1.46407	31	2.03824	51	2.25615	48	1.03747	23	2.55646	54	1.93643	45	2.28765	48	2.46229	51	4.22556	91	2.92674	62	2.80266	58	0.459979	0.278751	normal	0.645037	0.189867	normal	0.99104	0.0055042	normal	0.274038	0.484094
HORVU.MOREX.r3.1HG0014170	HORVU.MOREX.r3.1HG0014170	--	2.46862	28	0.880005	10	1.32971	16	1.57127	17	1.94378	21	2.21072	26	2.26801	29	0.800616	9	1.78119	23	2.05666	22	2.53203	28	1.04809	12	1.73001	21	0.94649	10	2.33766	25	2.8889	32	2.73998	30	1.72972	19	--	--	--	--	--	--	--	--	--	--	--
HORVU.MOREX.r3.1HG0014190	HORVU.MOREX.r3.1HG0014190	LOC109762262	9.69262	743	9.81123	735	8.62331	662	9.09809	650	10.4322	751	10.1965	787	15.3488	1314	13.983	999	15.0907	1275	14.8174	1063	15.8288	1162	15.4438	1100	11.2696	886	11.1366	795	10.6488	746	13.0872	964	11.1934	803	11.5434	815	0.0200631	0.271466	normal	1.33451e-13	-0.691262	normal	0.642626	0.0517252	normal	3.2382e-06	-0.468777
HORVU.MOREX.r3.1HG0014210	HORVU.MOREX.r3.1HG0014210	--	0.078537	2	0	0	0	0	0	0	0	0	0	0	0	0	0	0	0	0	0	0	0.009371	1	0	0	0	0	0	0	0	0	0	0	0	0	0.025996	1	--	--	--	--	--	--	--	--	--	--	--
HORVU.MOREX.r3.1HG0014220	HORVU.MOREX.r3.1HG0014220	--	5.6426	470	4.55922	371	4.74637	396	0	0	0	0	0	0	0.689987	65	0.884388	69	0.596137	55	0	0	0	0	0	0	1.14773	98	1.39944	109	1.1646	89	0	0	0	0	0	0	1.1434e-53	-6.9315	down	1.07366e-42	2.66947	up	1.07852e-17	-3.15935	down	--	--
HORVU.MOREX.r3.1HG0014230	HORVU.MOREX.r3.1HG0014230	--	0	0	0	0	0	0	0.027527	1	0	0	0	0	0	0	0	0	0	0	0	0	0	0	0	0	0	0	0	0	0	0	0	0	0	0	0.148471	3	--	--	--	--	--	--	--	--	--	--	--
HORVU.MOREX.r3.1HG0014240	HORVU.MOREX.r3.1HG0014240	LOC109764960	0	0	0	0	0	0	0	0	0	0	0.111803	5	0	0	0	0	0	0	0	0	0	0	0	0	0	0	0	0	0	0	0	0	0	0	0	0	--	--	--	--	--	--	--	--	--	--	--
HORVU.MOREX.r3.1HG0014250	HORVU.MOREX.r3.1HG0014250	LOC109764960	0	0	0	0	0	0	0	0	0	0	0	0	0	0	0	0	0	0	0	0	0	0	0	0	0	0	0	0	0	0	0	0	0	0	0	0	--	--	--	--	--	--	--	--	--	--	--
HORVU.MOREX.r3.1HG0014260	HORVU.MOREX.r3.1HG0014260	LOC109764960	0	0	0	0	0	0	0	0	0	0	0	0	0	0	0	0	0	0	0	0	0	0	0	0	0	0	0	0	0	0	0	0	0	0	0	0	--	--	--	--	--	--	--	--	--	--	--
HORVU.MOREX.r3.1HG0014270	HORVU.MOREX.r3.1HG0014270	--	0	0	0	0	0	0	0	0	0	0	0	0	0	0	0	0	0	0	0	0	0	0	0	0	0	0	0	0	0	0	0	0	0	0	0	0	--	--	--	--	--	--	--	--	--	--	--
HORVU.MOREX.r3.1HG0014280	HORVU.MOREX.r3.1HG0014280	--	0	0	0	0	0	0	0	0	0	0	0	0	0	0	0	0	0	0	0	0	0	0	0	0	0	0	0	0	0	0	0	0	0	0	0	0	--	--	--	--	--	--	--	--	--	--	--
HORVU.MOREX.r3.1HG0014310	HORVU.MOREX.r3.1HG0014310	--	0	0	0	0	0	0	0	0	0.036963	2	0	0	0	0	0	0	0	0	0	0	0	0	0	0	0.186902	6	0	0	0	0	0	0	0	0	0	0	--	--	--	--	--	--	--	--	--	--	--
HORVU.MOREX.r3.1HG0014320	HORVU.MOREX.r3.1HG0014320	--	4.90526	560	4.26415	475	5.56494	636	4.21556	448	4.23483	454	4.74242	545	3.15412	402	2.94956	314	2.89947	365	3.12895	334	2.75034	301	2.88763	306	2.9159	342	2.44246	260	2.40931	252	3.19767	351	2.96508	317	3.00926	317	0.846546	0.0332334	normal	1.70384e-06	0.666758	normal	0.852753	-0.0377898	normal	6.81954e-08	0.74781
HORVU.MOREX.r3.1HG0014340	HORVU.MOREX.r3.1HG0014340	--	24.0174	3221	24.9631	3238	25.6751	3393	18.8104	2335	20.7261	2552	24.4113	3235	27.322	3993	25.9745	3197	27.577	4007	24.3827	3037	23.6542	3035	27.2775	3307	29.6036	3890	26.9994	3317	28.4713	3385	26.4282	3401	25.6341	3155	25.055	3079	0.700032	-0.0406142	normal	0.0219601	-0.135826	normal	0.188116	-0.0933843	normal	0.428403	-0.0794495
HORVU.MOREX.r3.1HG0014350	HORVU.MOREX.r3.1HG0014350	--	9.65884	564	8.95435	510	9.20542	538	2.81548	153	3.9877	219	2.10366	124	8.19012	534	7.63567	415	7.77684	500	8.66113	473	8.98312	502	7.59114	411	7.38411	442	9.22383	501	8.09808	432	8.81237	494	9.93332	542	7.96418	428	7.57989e-14	-1.41117	down	0.116864	0.199965	normal	0.565451	0.0935943	normal	7.86554e-11	-1.32049
HORVU.MOREX.r3.1HG0014360	HORVU.MOREX.r3.1HG0014360	--	0.206641	7	0.218174	8	0.223386	8	0	0	0	0	0	0	0	0	0	0	0	0	0	0	0	0	0	0	0	0	0	0	0	0	0	0	0	0	0	0	--	--	--	--	--	--	--	--	--	--	--
HORVU.MOREX.r3.1HG0014380	HORVU.MOREX.r3.1HG0014380	--	0	0	0.049483	1	0	0	0.53949	11	0.245545	5	0	0	0.280268	7	1.32021	26	0.706324	17	0.247137	5	0.504315	10	0.701545	14	2.30204	49	2.70909	53	1.43686	28	1.94628	39	3.37852	66	2.31072	45	--	--	--	--	--	--	--	--	--	--	--
HORVU.MOREX.r3.1HG0014390	HORVU.MOREX.r3.1HG0014390	--	0	0	0	0	0	0	0	0	0	0	0	0	0	0	0	0	0	0	0	0	0	0	0	0	0	0	0	0	0	0	0	0	0	0	0	0	--	--	--	--	--	--	--	--	--	--	--
HORVU.MOREX.r3.1HG0014400	HORVU.MOREX.r3.1HG0014400	--	5.2522	368	3.72821	255	4.23998	298	426.935	27826	406.183	26696	429.279	30249	0	0	0	0	0	0	0	0	0	0	0.638515	42	0	0	0	0	0	0	0	0	0	0	0.107687	7	0	6.73266	up	1.4934e-49	6.812	up	--	--	--	0.0739185	1.68485
HORVU.MOREX.r3.1HG0014410	HORVU.MOREX.r3.1HG0014410	--	13.1385	1199	13.4951	1202	13.234	1209	13.2893	1129	12.6921	1088	11.1888	1028	6.60076	673	6.45657	549	7.06587	711	10.2526	875	7.83606	685	8.8624	751	12.686	1187	12.2141	1037	12.3348	1028	15.2378	1335	17.5181	1494	15.2018	1277	0.403754	0.0924754	normal	6.58019e-26	0.943943	normal	0.000771056	0.410529	normal	1.99549e-07	0.624919
HORVU.MOREX.r3.1HG0014420	HORVU.MOREX.r3.1HG0014420	--	0.125627	2	0.119263	2	0	0	0.078254	2	0	0	0.35608	6	0	0	0	0	0	0	0	0	0.131169	2	0	0	0	0	0	0	0	0	0	0	0	0	0.055943	1	--	--	--	--	--	--	--	--	--	--	--
HORVU.MOREX.r3.1HG0014430	HORVU.MOREX.r3.1HG0014430	--	15.4024	1195	12.8293	972	14.2159	1105	14.22	1028	13.4795	982	14.6094	1142	14.5359	1260	16.576	1199	15.956	1365	17.5268	1273	18.1216	1347	20.7901	1498	16.2586	1293	13.8377	1000	16.1651	1146	22.626	1686	19.7556	1433	21.0619	1505	0.0835722	0.187591	normal	0.0759461	-0.182452	normal	0.00689886	0.258201	normal	0.0119639	-0.251881
HORVU.MOREX.r3.1HG0014440	HORVU.MOREX.r3.1HG0014440	--	11.344	787	10.8753	736	11.468	796	9.38905	607	9.27372	604	9.71349	678	9.64466	747	9.481	613	8.468	648	7.61588	494	9.93897	660	10.4525	673	11.1069	790	12.177	786	10.3291	654	13.2211	880	13.2823	861	13.4824	861	0.679232	-0.0527488	normal	0.0219854	0.250541	normal	0.91733	0.0195023	normal	0.215192	0.181399
HORVU.MOREX.r3.1HG0014450	HORVU.MOREX.r3.1HG0014450	--	0	0	0	0	0	0	0	0	0	0	0	0	0	0	0	0	0	0	0	0	0	0	0	0	0.087018	1	0	0	0	0	0	0	0	0	0	0	--	--	--	--	--	--	--	--	--	--	--
HORVU.MOREX.r3.1HG0014460	HORVU.MOREX.r3.1HG0014460	--	0.170183	4	0	0	0	0	0	0	0	0	0	0	0	0	0	0	0	0	0	0	0.098463	2	0	0	0	0	0	0	0.079795	2	0.356161	7	0	0	0.079245	2	--	--	--	--	--	--	--	--	--	--	--
HORVU.MOREX.r3.1HG0014490	HORVU.MOREX.r3.1HG0014490	--	1.0707	101	0.78873	72	0.628956	59	0.261117	23	0.47391	42	0.602168	57	0.497292	52	0.420658	37	0.738452	77	0.353786	31	0.840181	76	0.774079	68	0.342575	33	0.194997	17	0.351414	31	0.270764	25	0.528166	47	0.47579	41	0.102049	-0.628667	normal	0.1708	0.497503	normal	0.659654	0.190681	normal	0.437384	-0.375465
HORVU.MOREX.r3.1HG0014500	HORVU.MOREX.r3.1HG0014500	--	0	0	0	0	0	0	0	0	0	0	0	0	0	0	0	0	0	0	0	0	0	0	0	0	0	0	0	0	0	0	0	0	0	0	0	0	--	--	--	--	--	--	--	--	--	--	--
HORVU.MOREX.r3.1HG0014510	HORVU.MOREX.r3.1HG0014510	--	0	0	0	0	0	0	0	0	0.077579	1	0.20822	3	0.199676	3	0	0	0.397831	6	0	0	0.026904	1	0	0	0.071548	1	0.061238	1	0.081393	2	0.824776	11	0.429421	6	0	0	--	--	--	--	--	--	--	--	--	--	--
HORVU.MOREX.r3.1HG0014520	HORVU.MOREX.r3.1HG0014520	--	3.98097	258	3.72227	236	4.20722	273	2.80697	170	2.30654	141	2.45235	160	3.28148	238	3.73396	226	4.32125	309	4.22597	256	4.14518	257	3.83327	231	8.64264	574	7.01673	423	7.74125	458	8.7619	545	9.53618	577	10.7096	638	0.0218088	-0.447293	normal	0.875364	0.0336758	normal	0.664313	0.0979722	normal	0.00858116	-0.517253
HORVU.MOREX.r3.1HG0014530	HORVU.MOREX.r3.1HG0014530	--	95.4138	5613	94.6657	5436	92.8947	5471	127.052	6959	132.037	7293	133.755	7921	160.164	10522	155.541	8525	155.014	10052	248.679	13685	245.746	13845	253.969	13872	120.161	7246	118.567	6491	116.764	6273	203.881	11515	199.51	10970	204.071	11053	9.51851e-35	0.665631	normal	8.48377e-76	-0.768823	normal	2.30117e-74	0.66693	normal	1.1747e-53	-0.766651
HORVU.MOREX.r3.1HG0014540	HORVU.MOREX.r3.1HG0014540	--	0	0	0	0	0	0	0	0	0	0	0	0	0	0	0	0	0	0	0	0	0	0	0	0	0	0	0	0	0	0	0	0	0	0	0	0	--	--	--	--	--	--	--	--	--	--	--
HORVU.MOREX.r3.1HG0014550	HORVU.MOREX.r3.1HG0014550	--	0	0	0	0	0	0	0	0	0	0	0	0	0	0	0	0	0	0	0	0	0	0	0	0	0	0	0	0	0	0	0	0	0	0	0	0	--	--	--	--	--	--	--	--	--	--	--
HORVU.MOREX.r3.1HG0014560	HORVU.MOREX.r3.1HG0014560	--	10.8279	775	9.85824	689	10.3232	740	11.6723	778	11.1038	747	10.0515	725	20.2321	1617	21.6463	1444	21.9917	1735	18.0095	1206	17.5611	1204	15.6116	1038	19.3644	1421	17.4482	1162	20.9346	1369	23.2937	1601	23.8275	1594	20.9446	1381	0.018424	0.274041	normal	2.58439e-36	-1.0717	down	0.000314895	-0.315191	normal	1.22484e-05	-0.475663
HORVU.MOREX.r3.1HG0014570	HORVU.MOREX.r3.1HG0014570	--	1.74762	98	2.06184	121	2.4422	160	29.9272	1520	30.9682	1657	32.3069	1804	21.1523	1334	21.4327	1125	20.07	1305	30.0353	1573	27.7388	1497	30.2624	1596	10.3595	619	12.4678	676	12.3796	688	37.6347	2075	34.6058	1865	33.4045	1780	1.11416e-200	3.90749	up	8.71771e-126	-3.22214	down	8.61204e-10	0.464217	normal	0.00769958	0.22638
HORVU.MOREX.r3.1HG0014580	HORVU.MOREX.r3.1HG0014580	--	3.87658	382	4.32898	416	4.44036	438	10.9326	1003	10.204	944	10.1547	1007	5.60204	616	5.31524	488	4.89273	531	10.5011	968	9.50719	897	10.5438	964	5.6987	575	6.30754	578	5.95721	536	11.1552	1055	10.9307	1006	11.4981	1043	3.61564e-43	1.48845	up	0.00714604	-0.353237	normal	1.64102e-20	0.933396	normal	0.0600434	0.197265
HORVU.MOREX.r3.1HG0014590	HORVU.MOREX.r3.1HG0014590	--	9.15181	367	7.01116	275	9.73552	391	6.52667	244	5.1182	193	4.23433	171	10.7442	482	9.58915	359	9.23151	409	6.46738	243	7.0607	272	7.26568	271	14.0394	578	13.4729	503	13.5813	498	10.3695	400	11.7209	440	11.1238	411	0.0161364	-0.498577	normal	0.195024	-0.223118	normal	0.00100633	-0.490293	normal	0.311576	-0.224365
HORVU.MOREX.r3.1HG0014600	HORVU.MOREX.r3.1HG0014600	--	0.051858	3	0.026563	2	0.025901	2	0	0	0	0	0	0	0.135439	6	0.027829	2	0.045319	2	0.038987	2	0	0	0	0	0.046713	2	0.05517	2	0	0	0	0	0	0	0	0	--	--	--	--	--	--	--	--	--	--	--
HORVU.MOREX.r3.1HG0014610	HORVU.MOREX.r3.1HG0014610	--	0	0	0	0	0	0	0	0	0	0	0	0	0	0	0	0	0	0	0	0	0	0	0	0	0	0	0	0	0	0	0	0	0.13808	3	0.097611	2	--	--	--	--	--	--	--	--	--	--	--
HORVU.MOREX.r3.1HG0014620	HORVU.MOREX.r3.1HG0014620	--	13.9068	3184	14.0456	3139	15.0077	3439	4.43835	946	4.05486	872	6.14825	1417	8.78582	2246	8.45107	1803	8.33053	2102	7.01989	1504	8.83741	1938	7.87012	1673	7.96925	1870	7.8465	1672	7.58892	1587	6.50043	1429	6.61692	1416	7.24569	1528	7.82672e-32	-1.34607	down	2.73549e-30	0.711414	normal	0.28103	-0.106713	normal	6.35974e-05	-0.532796
HORVU.MOREX.r3.1HG0014630	HORVU.MOREX.r3.1HG0014630	--	0	0	0	0	0	0	0	0	0	0	0	0	0	0	0	0	0	0	0	0	0	0	0	0	0	0	0	0	0	0	0	0	0	0	0	0	--	--	--	--	--	--	--	--	--	--	--
HORVU.MOREX.r3.1HG0014640	HORVU.MOREX.r3.1HG0014640	LOC109742515	0.464924	55	0.533516	62	0.280184	34	0.55099	61	0.635642	71	0.512496	61	0.440894	59	0.545486	61	0.386157	51	0.424716	47	0.61332	70	0.365141	41	0.4079	50	0.399243	44	0.404166	44	0.24639	28	0.267521	30	0.588562	64	0.125095	0.55025	normal	0.75344	-0.132346	normal	0.957616	0.0238927	normal	0.27772	0.413781
HORVU.MOREX.r3.1HG0014650	HORVU.MOREX.r3.1HG0014650	LOC109769052	0.824934	78	0.752062	69	1.13976	107	0.0438	4	0	0	0	0	0.16536	18	0.058848	6	0.146112	16	0	0	0	0	0	0	0.418672	41	0.286021	25	0.145609	13	0	0	0	0	0	0	1.81898e-17	-4.14211	down	4.08897e-10	2.41117	up	--	--	--	--	--
HORVU.MOREX.r3.1HG0014660	HORVU.MOREX.r3.1HG0014660	--	1.1589	109	1.65096	151	1.24252	117	0.667334	58	1.19702	105	0.765843	72	1.4785	155	1.50142	131	1.34423	139	1.16468	102	1.19905	108	0.933268	81	1.2317	118	0.969033	85	1.23889	106	1.14313	103	1.23053	108	1.23557	107	0.180719	-0.41227	normal	0.650698	-0.123393	normal	0.168485	-0.355391	normal	0.645223	-0.164998
HORVU.MOREX.r3.1HG0014670	HORVU.MOREX.r3.1HG0014670	--	0.907922	11	0.502016	6	0.648436	8	0.445265	6	0.755265	9	0.68422	9	0.703059	10	0.769407	9	0.698763	10	1.41544	17	0.538085	7	1.27367	15	0.661227	9	0.7319	9	0.907378	11	0.811471	10	0.795813	10	0.44731	5	--	--	--	--	--	--	--	--	--	--	--
HORVU.MOREX.r3.1HG0014680	HORVU.MOREX.r3.1HG0014680	--	11.9689	679	11.5115	637	11.1095	631	4.09652	217	4.14204	221	3.8558	220	7.17255	454	6.4314	340	6.45119	403	5.63799	299	7.02801	382	5.83516	307	7.33141	426	6.82022	360	6.62168	343	10.6493	580	11.8178	626	9.49947	496	4.9098e-23	-1.3037	down	2.31413e-10	0.743392	normal	0.546139	-0.112561	normal	0.0118638	-0.44485
HORVU.MOREX.r3.1HG0014690	HORVU.MOREX.r3.1HG0014690	--	26.8525	1046	27.1309	1032	26.9589	1051	19.1081	693	16.5842	607	16.581	650	23.8091	1036	18.6533	677	21.064	905	17.7348	647	23.1451	864	22.166	802	14.7784	590	14.1345	513	13.0017	463	18.7315	701	15.4203	562	16.3483	587	4.55955e-05	-0.433504	normal	0.00321777	0.309819	normal	0.946873	-0.011925	normal	0.467013	-0.10763
HORVU.MOREX.r3.1HG0014700	HORVU.MOREX.r3.1HG0014700	--	0	0	0	0	0	0	0	0	0	0	0	0	0	0	0	0	0	0	0	0	0	0	0	0	0	0	0	0	0	0	0	0	0	0	0	0	--	--	--	--	--	--	--	--	--	--	--
HORVU.MOREX.r3.1HG0014710	HORVU.MOREX.r3.1HG0014710	--	0	0	0	0	0.060405	4	0	0	0	0	0	0	0.024819	2	0.032452	3	0	0	0.03232	3	0	0	0.032563	3	0	0	0	0	0	0	0	0	0	0	0	0	--	--	--	--	--	--	--	--	--	--	--
HORVU.MOREX.r3.1HG0014720	HORVU.MOREX.r3.1HG0014720	--	0	0	0	0	0	0	0	0	0	0	0	0	0	0	0	0	0	0	0	0	0	0	0	0	0	0	0.063901	1	0	0	0.194489	3	0	0	0.074846	1	--	--	--	--	--	--	--	--	--	--	--
HORVU.MOREX.r3.1HG0014730	HORVU.MOREX.r3.1HG0014730	--	2.22449	65	2.6014	74	2.7688	81	1.14953	32	1.55097	43	0.662307	20	3.03961	99	2.24214	61	2.45931	79	1.22806	34	1.97407	55	1.6994	46	3.77032	113	3.93643	107	4.57584	122	4.94385	138	2.24628	61	3.43048	92	0.0219731	-0.863549	normal	0.865969	-0.0600114	normal	0.0955234	-0.547206	normal	0.500715	-0.335701
HORVU.MOREX.r3.1HG0014740	HORVU.MOREX.r3.1HG0014740	--	37.2477	3082	38.7593	3131	38.5138	3191	31.6881	2442	30.5955	2377	37.404	3116	41.9628	3878	41.4568	3196	43.2089	3941	45.6255	3532	45.6554	3618	46.5269	3575	49.9217	4234	51.1092	3936	50.5449	3820	60.3582	4795	55.9618	4328	57.877	4410	0.954808	-0.00625639	normal	0.00145286	-0.180336	normal	0.0342786	0.120948	normal	0.000134884	-0.304435
HORVU.MOREX.r3.1HG0014750	HORVU.MOREX.r3.1HG0014750	--	21.0446	1971	17.9243	1638	22.1218	2074	16.3753	1428	16.0862	1414	20.6627	1948	21.025	2199	20.8439	1819	21.3853	2207	23.222	2034	20.5462	1843	24.3218	2115	25.2984	2428	26.8338	2338	26.1072	2232	27.3234	2456	31.758	2779	31.0945	2681	0.952883	-0.00869668	normal	0.375765	-0.084467	normal	0.236689	0.104702	normal	0.0734362	-0.195461
HORVU.MOREX.r3.1HG0014760	HORVU.MOREX.r3.1HG0014760	--	0.621215	10	0.546884	8	0.739334	11	2.10263	29	1.32273	19	1.46689	22	0.914881	16	1.82472	26	1.84428	31	1.68344	24	1.70739	25	2.86189	40	1.68366	26	1.5341	22	1.5292	21	2.78429	40	2.66424	37	4.22737	58	--	--	--	--	--	--	--	--	--	--	--
HORVU.MOREX.r3.1HG0014770	HORVU.MOREX.r3.1HG0014770	--	0	0	0	0	0	0	0	0	0	0	0	0	0	0	0	0	0	0	0	0	0	0	0	0	0	0	0	0	0	0	0	0	0	0	0	0	--	--	--	--	--	--	--	--	--	--	--
HORVU.MOREX.r3.1HG0014780	HORVU.MOREX.r3.1HG0014780	--	0	0	0	0	0	0	0	0	0	0	0	0	0	0	0	0	0	0	0	0	0	0	0	0	0	0	0	0	0	0	0	0	0	0	0	0	--	--	--	--	--	--	--	--	--	--	--
HORVU.MOREX.r3.1HG0014790	HORVU.MOREX.r3.1HG0014790	LOC109734114	3.95055	98	5.14376	124	7.0166	174	6.68787	154	6.08167	141	7.27977	181	7.78811	215	5.51754	127	7.37672	201	5.73363	133	5.16985	123	5.82294	134	4.18555	106	5.90762	136	5.36926	121	5.11278	122	5.12066	119	4.33951	99	0.0563958	0.4855	normal	0.156529	-0.377817	normal	0.255909	-0.280877	normal	0.0734344	0.412772
HORVU.MOREX.r3.1HG0014800	HORVU.MOREX.r3.1HG0014800	LOC109734113	1.34099	37	0.86991	24	1.69103	47	1.09145	28	1.83448	47	1.22296	34	2.49385	76	3.2167	82	2.59859	79	2.68689	69	1.56699	41	2.14783	55	3.40598	96	5.18543	132	3.97143	99	5.64736	148	8.75911	224	7.92001	199	0.633338	0.227607	normal	0.00415843	-1.00555	down	0.376268	-0.311393	normal	0.317066	-0.440843
HORVU.MOREX.r3.1HG0014830	HORVU.MOREX.r3.1HG0014830	--	0.241069	4	0.254789	5	0	0	0.129451	3	0	0	0.188383	4	0	0	0	0	0	0	0	0	0	0	0	0	0	0	0	0	0	0	0	0	0	0	0	0	--	--	--	--	--	--	--	--	--	--	--
HORVU.MOREX.r3.1HG0014840	HORVU.MOREX.r3.1HG0014840	--	17.4575	347	12.467	242	16.2638	324	11.7403	217	11.0333	206	12.0498	241	0.194938	5	1.0774	20	0.354135	8	1.72804	33	1.44694	28	0.993517	19	0.098325	3	0.108306	3	0.055182	2	0.011897	1	0.333185	7	0.082099	2	0.290086	-0.211283	normal	5.84348e-16	3.80718	up	--	--	--	1.77074e-31	3.11379
HORVU.MOREX.r3.1HG0014850	HORVU.MOREX.r3.1HG0014850	--	0	0	0.085711	3	0	0	0.039357	2	0.073639	3	0	0	0	0	0	0	0	0	0.07391	3	0	0	0	0	0	0	0	0	0	0	0	0	0	0	0	0	--	--	--	--	--	--	--	--	--	--	--
HORVU.MOREX.r3.1HG0014890	HORVU.MOREX.r3.1HG0014890	--	13.5001	346	10.3388	258	12.7181	326	10.0962	241	9.56251	230	9.51872	245	0.148765	5	0.496858	12	0.291482	9	1.31725	32	2.28414	56	1.59144	38	0	0	0	0	0.035699	1	0.040747	1	0.167416	5	0.165428	4	0.509827	-0.129554	normal	2.98855e-55	4.78928	up	--	--	--	5.8364e-26	2.59329
HORVU.MOREX.r3.1HG0014900	HORVU.MOREX.r3.1HG0014900	--	0.134549	4	0.172431	5	0.3277	9	1.6009	40	2.44678	61	0.891047	24	0.50675	15	1.14501	29	0.314287	10	0.873715	22	0.843959	22	0.421412	11	0.66861	19	0.983422	25	0.945535	23	1.23241	32	0.527004	14	1.09356	27	--	--	--	--	--	--	--	--	--	--	--
HORVU.MOREX.r3.1HG0014910	HORVU.MOREX.r3.1HG0014910	--	0	0	0	0	0	0	0.416739	6	0	0	0	0	0.057134	1	0.643342	10	0	0	0	0	0	0	0	0	0.293023	5	0	0	0	0	0.067813	2	0.487582	7	0.068828	1	--	--	--	--	--	--	--	--	--	--	--
HORVU.MOREX.r3.1HG0014920	HORVU.MOREX.r3.1HG0014920	LOC109759456	1.06164	15	0.598787	9	0.264638	4	7.80474	101	5.6662	74	7.13491	100	6.12211	95	4.61593	60	4.71761	72	4.85711	63	5.9578	79	6.86472	88	2.65109	38	3.07555	40	2.26629	29	9.35882	124	8.96185	116	10.3084	131	8.1943e-16	3.09677	up	9.75427e-10	-2.54348	down	0.656714	0.159557	normal	0.230946	0.381944
HORVU.MOREX.r3.1HG0014930	HORVU.MOREX.r3.1HG0014930	--	0	0	0	0	0	0	0	0	0	0	0	0	0	0	0	0	0	0	0	0	0	0	0	0	0	0	0	0	0	0	0	0	0	0	0	0	--	--	--	--	--	--	--	--	--	--	--
HORVU.MOREX.r3.1HG0014950	HORVU.MOREX.r3.1HG0014950	--	0	0	0	0	0	0	0	0	0	0	0	0	0	0	0	0	0	0	0	0	0	0	0	0	0	0	0	0	0	0	0	0	0	0	0	0	--	--	--	--	--	--	--	--	--	--	--
HORVU.MOREX.r3.1HG0014960	HORVU.MOREX.r3.1HG0014960	LOC112892431	0	0	0	0	0	0	0	0	0	0	0	0	0	0	0	0	0	0	0	0	0	0	0	0	0	0	0	0	0	0	0	0	0	0	0	0	--	--	--	--	--	--	--	--	--	--	--
HORVU.MOREX.r3.1HG0014970	HORVU.MOREX.r3.1HG0014970	--	2.06983	129	1.35453	82	2.17299	135	5.61322	325	6.35887	371	8.4857	530	0.044485	4	0	0	0	0	0.443903	26	0.326825	20	0.532234	31	0	0	0	0	0	0	0	0	0	0	0	0	1.41981e-22	1.99638	up	1.40616e-25	4.86463	up	--	--	--	1.46936e-59	4.03355
HORVU.MOREX.r3.1HG0014980	HORVU.MOREX.r3.1HG0014980	--	0	0	0	0	0	0	0	0	0	0	0	0	0	0	0	0	0	0	0	0	0	0	0	0	0	0	0	0	0	0	0	0	0	0	0	0	--	--	--	--	--	--	--	--	--	--	--
HORVU.MOREX.r3.1HG0014990	HORVU.MOREX.r3.1HG0014990	--	0	0	0	0	0.013954	1	0	0	0	0	0	0	0	0	0	0	0.012844	1	0	0	0	0	0	0	0	0	0.019018	1	0	0	0	0	0.030294	1	0.139421	2	--	--	--	--	--	--	--	--	--	--	--
HORVU.MOREX.r3.1HG0015000	HORVU.MOREX.r3.1HG0015000	--	0	0	0	0	0	0	0	0	0	0	0	0	0	0	0	0	0	0	0	0	0	0	0	0	0	0	0	0	0	0	0	0	0	0	0	0	--	--	--	--	--	--	--	--	--	--	--
HORVU.MOREX.r3.1HG0015010	HORVU.MOREX.r3.1HG0015010	--	0	0	0	0	0	0	0	0	0	0	0	0	0	0	0	0	0	0	0	0	0	0	0	0	0	0	0	0	0	0	0	0	0	0	0	0	--	--	--	--	--	--	--	--	--	--	--
HORVU.MOREX.r3.1HG0015020	HORVU.MOREX.r3.1HG0015020	--	48.279	758	48.2097	739	46.4693	731	31.8999	467	33.4697	494	38.3124	606	60.8568	1067	62.9415	921	70.0791	1213	47.8921	704	49.8637	750	48.1829	703	143.504	2309	136.41	1993	139.051	1994	92.2712	1391	80.9974	1189	85.5251	1236	0.0305119	-0.265541	normal	1.17483e-06	-0.472432	normal	4.24559e-05	-0.403373	normal	0.0067218	-0.328751
HORVU.MOREX.r3.1HG0015030	HORVU.MOREX.r3.1HG0015030	--	0	0	0	0	0	0	0	0	0	0	0	0	0	0	0	0	0	0	0	0	0	0	0	0	0	0	0	0	0	0	0	0	0	0	0	0	--	--	--	--	--	--	--	--	--	--	--
HORVU.MOREX.r3.1HG0015040	HORVU.MOREX.r3.1HG0015040	--	1.06581	13	0.739148	9	0.931711	11	0.32722	4	0	0	0	0	0.435104	6	0.33552	4	0.51323	7	0	0	0	0	0	0	0	0	0	0	0	0	0	0	0	0	0	0	--	--	--	--	--	--	--	--	--	--	--
HORVU.MOREX.r3.1HG0015050	HORVU.MOREX.r3.1HG0015050	LOC109784346	0	0	0	0	0	0	0	0	0	0	0	0	0	0	0	0	0	0	0	0	0	0	0	0	0	0	0	0	0	0	0	0	0	0	0	0	--	--	--	--	--	--	--	--	--	--	--
HORVU.MOREX.r3.1HG0015070	HORVU.MOREX.r3.1HG0015070	--	0	0	0.185201	3	0.111281	2	0	0	0	0	0	0	0	0	0.189888	3	0	0	0	0	0	0	0	0	0	0	0	0	0	0	0	0	0	0	0	0	--	--	--	--	--	--	--	--	--	--	--
HORVU.MOREX.r3.1HG0015080	HORVU.MOREX.r3.1HG0015080	--	0	0	0	0	0	0	0	0	0	0	0	0	0	0	0	0	0	0	0	0	0	0	0	0	0	0	0	0	0	0	0	0	0	0	0	0	--	--	--	--	--	--	--	--	--	--	--
HORVU.MOREX.r3.1HG0015090	HORVU.MOREX.r3.1HG0015090	--	0	0	0	0	0	0	0	0	0	0	0	0	0	0	0	0	0	0	0	0	0	0	0	0	0	0	0	0	0	0	0	0	0	0	0	0	--	--	--	--	--	--	--	--	--	--	--
HORVU.MOREX.r3.1HG0015110	HORVU.MOREX.r3.1HG0015110	--	15.4844	1189	18.0064	1350	13.9682	1074	20.4056	1459	23.7346	1711	24.3489	1882	33.8164	2899	30.2012	2160	31.9652	2705	38.161	2741	35.7857	2631	39.0344	2783	38.3584	3019	36.2736	2592	35.7002	2503	36.6622	2702	31.4895	2260	33.9	2396	3.51176e-12	0.717927	normal	8.78325e-35	-1.04715	down	0.000633388	0.232813	normal	8.80975e-12	-0.558562
HORVU.MOREX.r3.1HG0015120	HORVU.MOREX.r3.1HG0015120	--	0	0	0	0	0	0	0	0	0	0	0	0	0	0	0	0	0	0	0	0	0	0	0	0	0	0	0	0	0	0	0	0	0	0	0	0	--	--	--	--	--	--	--	--	--	--	--
HORVU.MOREX.r3.1HG0015130	HORVU.MOREX.r3.1HG0015130	--	9.32369	734	11.7461	902	11.7906	929	15.4038	1128	16.7991	1241	14.5599	1153	25.8798	2273	24.3032	1781	25.8566	2242	25.1859	1853	23.7378	1788	20.7954	1519	34.9992	2821	34.0874	2495	33.9931	2441	31.0757	2346	30.0056	2206	27.6916	2005	4.19106e-10	0.696338	normal	5.83233e-42	-1.23819	down	0.188725	-0.124054	normal	4.22753e-05	-0.412206
HORVU.MOREX.r3.1HG0015140	HORVU.MOREX.r3.1HG0015140	--	0.852313	24	1.03289	28	0.739828	21	0.93172	24	1.05781	28	1.38669	39	1.0433	33	0.611755	16	1.05145	32	0.336416	9	1.31896	35	0.35456	10	0.770896	22	0.548352	15	0.48968	13	0.218789	6	1.33468	35	0.810461	21	--	--	--	--	--	--	--	--	--	--	--
HORVU.MOREX.r3.1HG0015150	HORVU.MOREX.r3.1HG0015150	--	1.01088	18	0.681806	12	0.824894	14	1.0125	16	0.783443	13	0.203418	4	0.23873	5	1.57653	25	0.261142	5	0.240359	4	0.285764	5	1.11539	18	0.182103	4	0.559026	9	0.966795	15	0	0	0.611743	10	0.343454	6	--	--	--	--	--	--	--	--	--	--	--
HORVU.MOREX.r3.1HG0015160	HORVU.MOREX.r3.1HG0015160	--	0.567513	11	0.400425	8	0.370981	8	0	0	0.050738	1	0	0	0.620904	14	0.009704	1	0.152366	4	0.161322	3	0.193159	4	0.390978	7	0.217798	5	0.614718	11	0.113855	2	0.10721	2	0.222105	4	0.445295	8	--	--	--	--	--	--	--	--	--	--	--
HORVU.MOREX.r3.1HG0015170	HORVU.MOREX.r3.1HG0015170	--	35.1587	1722	32.6281	1560	31.185	1529	27.6708	1262	29.1435	1340	28.1172	1386	32.3412	1769	30.6384	1398	31.3509	1692	29.4114	1348	31.0477	1456	31.1371	1416	29.4831	1480	29.3652	1338	29.9814	1341	28.3525	1333	25.7032	1177	27.92	1259	0.798975	-0.0269551	normal	0.715862	0.0333758	normal	0.662978	-0.0425937	normal	0.583736	0.0533353
HORVU.MOREX.r3.1HG0015180	HORVU.MOREX.r3.1HG0015180	--	1.87877	135	2.588	182	2.26179	163	0.075737	6	0	0	0	0	0	0	0	0	0	0	0	0	0	0	0	0	0	0	0	0	0	0	0	0	0	0	0	0	0.00050534	-2.14044	down	1.62701e-34	5.95699	up	--	--	--	--	--
HORVU.MOREX.r3.1HG0015190	HORVU.MOREX.r3.1HG0015190	--	2.40017	175	1.87008	133	2.2674	166	0.103026	7	0.036398	3	0.106671	8	0	0	0	0	0	0	0	0	0	0	0	0	0	0	0	0	0	0	0	0	0	0	0	0	8.62923e-27	-3.93994	down	2.47219e-34	5.94332	up	--	--	--	--	--
HORVU.MOREX.r3.1HG0015200	HORVU.MOREX.r3.1HG0015200	--	1.13033	44	0.787656	30	1.17125	45	0	0	0	0	0	0	0	0	0	0	0	0	0	0	0	0	0	0	0	0	0	0	0	0	0	0	0	0	0	0	--	--	--	--	--	--	--	--	--	--	--
HORVU.MOREX.r3.1HG0015210	HORVU.MOREX.r3.1HG0015210	--	0.487942	10	1.26328	25	0.438871	9	0	0	0	0	0	0	0	0	0	0	0	0	0	0	0	0	0	0	0	0	0	0	0	0	0	0	0	0	0	0	--	--	--	--	--	--	--	--	--	--	--
HORVU.MOREX.r3.1HG0015220	HORVU.MOREX.r3.1HG0015220	--	1.21801	21	2.02749	34	0.857892	15	0	0	0.253319	4	0.16809	3	0	0	0	0	0	0	0	0	0	0	0	0	0	0	0	0	0	0	0	0	0	0	0	0	--	--	--	--	--	--	--	--	--	--	--
HORVU.MOREX.r3.1HG0015240	HORVU.MOREX.r3.1HG0015240	--	3.06063	129	3.10865	128	4.02831	170	3.80956	149	1.74241	69	1.90728	81	3.77812	177	4.42828	173	4.68469	217	1.88818	75	2.05019	83	3.34957	131	1.97348	85	0.665661	26	1.58503	61	1.21702	49	1.9594	77	1.17392	46	0.466581	-0.243701	normal	0.122962	-0.354245	normal	0.00283533	-0.73274	normal	0.638541	0.187362
HORVU.MOREX.r3.1HG0015250	HORVU.MOREX.r3.1HG0015250	--	48.0471	4222	49.5503	4250	49.539	4358	42.4952	3477	50.7045	4183	44.2224	3912	75.7246	7430	78.9868	6466	82.4836	7989	75.0168	6166	75.1935	6328	74.3153	6063	68.3297	6154	68.6984	5617	66.6089	5345	79.8869	6739	74.9624	6157	75.5832	6115	0.255608	0.0947675	normal	1.31931e-46	-0.723155	normal	0.157682	-0.0792174	normal	2.73478e-14	-0.544741
HORVU.MOREX.r3.1HG0015260	HORVU.MOREX.r3.1HG0015260	--	0	0	0	0	0	0	0	0	0	0	0	0	0	0	0	0	0	0	0	0	0	0	0	0	0	0	0	0	0	0	0	0	0	0	0	0	--	--	--	--	--	--	--	--	--	--	--
HORVU.MOREX.r3.1HG0015270	HORVU.MOREX.r3.1HG0015270	--	19.3964	967	16.0432	781	19.9445	996	11.4279	531	10.8046	506	11.5375	580	11.9414	665	15.3563	714	12.4481	685	10.8127	505	12.7333	608	10.5144	487	8.69563	445	7.21743	335	8.19209	373	7.36604	353	8.08174	377	6.18112	284	2.18958e-05	-0.514395	normal	0.000498878	0.440591	normal	0.14581	-0.215083	normal	0.291854	0.149687
HORVU.MOREX.r3.1HG0015290	HORVU.MOREX.r3.1HG0015290	--	0	0	0	0	0	0	0	0	0	0	0	0	0	0	0	0	0	0	0	0	0	0	0	0	0	0	0	0	0	0	0	0	0	0	0	0	--	--	--	--	--	--	--	--	--	--	--
HORVU.MOREX.r3.1HG0015310	HORVU.MOREX.r3.1HG0015310	LOC112270755	0	0	0.045933	2	0	0	0	0	0	0	0	0	0.088138	5	0.130971	6	0	0	0	0	0	0	0	0	0.119591	6	0.038272	2	0.018455	1	0.049681	3	0	0	0.042136	2	--	--	--	--	--	--	--	--	--	--	--
HORVU.MOREX.r3.1HG0015320	HORVU.MOREX.r3.1HG0015320	--	0	0	0	0	0	0	0	0	0	0	0	0	0	0	0	0	0	0	0	0	0	0	0	0	0	0	0	0	0	0	0	0	0	0	0	0	--	--	--	--	--	--	--	--	--	--	--
HORVU.MOREX.r3.1HG0015330	HORVU.MOREX.r3.1HG0015330	--	0	0	0	0	0	0	0.053806	3	0.026055	2	0.160235	10	0	0	0	0	0	0	0.169667	10	0.06612	4	0.179071	10	0	0	0	0	0	0	0.106924	6	0.054914	3	0.080731	5	--	--	--	--	--	--	--	--	--	--	--
HORVU.MOREX.r3.1HG0015360	HORVU.MOREX.r3.1HG0015360	--	0	0	0	0	0	0	0	0	0	0	0	0	0	0	0	0	0	0	0	0	0	0	0	0	0	0	0	0	0	0	0	0	0	0	0	0	--	--	--	--	--	--	--	--	--	--	--
HORVU.MOREX.r3.1HG0015390	HORVU.MOREX.r3.1HG0015390	--	3.76206	113	3.75943	110	2.90466	87	1.46173	41	1.82428	52	1.27839	39	2.67902	90	3.28199	92	3.49766	116	2.57989	73	2.12999	61	3.26674	91	6.4661	198	7.13449	199	7.01571	192	3.85729	111	4.06263	114	4.23132	117	0.00289345	-0.919982	normal	0.761362	0.0947702	normal	0.515112	-0.216509	normal	0.0993044	-0.60885
HORVU.MOREX.r3.1HG0015420	HORVU.MOREX.r3.1HG0015420	--	0.625732	8	0.85901	11	0.927491	12	1.50399	18	0.372425	5	1.48215	19	1.7552	24	0.721948	9	1.2303	17	2.10806	25	2.51993	30	1.31545	15	0.884546	12	1.43806	17	0.495824	6	0.769934	10	0.403886	5	0.877524	10	--	--	--	--	--	--	--	--	--	--	--
HORVU.MOREX.r3.1HG0015430	HORVU.MOREX.r3.1HG0015430	--	2.72669	144	2.66611	137	3.60327	190	2.98203	146	3.37934	167	3.23683	171	3.78566	222	3.13286	154	3.34943	194	3.55054	175	3.30612	167	3.19951	156	1.82824	99	2.13207	105	1.60142	77	1.61165	82	1.71293	85	1.67921	82	0.244671	0.273369	normal	0.358845	-0.216319	normal	0.918714	-0.0282251	normal	0.704234	0.091704
HORVU.MOREX.r3.1HG0015450	HORVU.MOREX.r3.1HG0015450	--	0	0	0	0	0	0	0.0093	1	0	0	0	0	0	0	0	0	0	0	0	0	0	0	0	0	0	0	0	0	0	0	0	0	0	0	0	0	--	--	--	--	--	--	--	--	--	--	--
HORVU.MOREX.r3.1HG0015460	HORVU.MOREX.r3.1HG0015460	--	0	0	0	0	0	0	0	0	0.159405	4	0	0	0	0	0	0	0	0	0	0	0	0	0.080596	2	0	0	0	0	0	0	0	0	0	0	0	0	--	--	--	--	--	--	--	--	--	--	--
HORVU.MOREX.r3.1HG0015470	HORVU.MOREX.r3.1HG0015470	--	41.4059	2045	48.3614	2331	43.104	2131	69.755	3207	70.3211	3260	65.5465	3258	53.9134	2973	54.0141	2485	53.0238	2886	61.7227	2851	61.2691	2897	63.1577	2896	46.2056	2339	49.9465	2295	42.2563	1906	28.1079	1333	26.6547	1230	27.1029	1232	2.29913e-27	0.820805	normal	6.02997e-06	-0.311559	normal	0.000272733	0.208502	normal	8.14577e-06	0.306062
HORVU.MOREX.r3.1HG0015480	HORVU.MOREX.r3.1HG0015480	--	22.0583	854	24.2709	917	20.487	794	15.7924	569	15.8882	578	14.6814	572	19.3792	838	20.1072	725	19.0661	813	17.7828	644	17.1406	635	17.5082	629	17.255	685	14.5129	523	13.7259	485	16.4284	611	18.0897	655	17.4959	624	0.00460051	-0.329896	normal	0.156909	0.153901	normal	0.17328	-0.156613	normal	0.922912	-0.0139771
HORVU.MOREX.r3.1HG0015510	HORVU.MOREX.r3.1HG0015510	--	0	0	0	0	0	0	0	0	0	0	0	0	0	0	0	0	0	0	0	0	0	0	0	0	0	0	0	0	0	0	0	0	0	0	0	0	--	--	--	--	--	--	--	--	--	--	--
HORVU.MOREX.r3.1HG0015520	HORVU.MOREX.r3.1HG0015520	--	2.17464	136	2.22206	136	1.45927	92	1.62855	95	1.96959	116	1.51375	96	1.07852	76	1.30646	77	1.74923	121	0.919317	54	1.41752	85	1.22457	72	0.151435	10	0.103251	7	0.242805	14	0.087066	6	0.146881	9	0.179261	11	0.999825	7.6757e-05	normal	0.145262	0.432725	normal	0.604187	-0.187444	normal	0.0294268	0.663205
HORVU.MOREX.r3.1HG0015530	HORVU.MOREX.r3.1HG0015530	--	0	0	0	0	0	0	0	0	0	0	0	0	0	0	0	0	0	0	0	0	0	0	0	0	0	0	0	0	0	0	0	0	0	0	0	0	--	--	--	--	--	--	--	--	--	--	--
HORVU.MOREX.r3.1HG0015540	HORVU.MOREX.r3.1HG0015540	--	0	0	0	0	0	0	0	0	0	0	0	0	0	0	0	0	0	0	0	0	0	0	0	0	0	0	0	0	0	0	0	0	0	0	0	0	--	--	--	--	--	--	--	--	--	--	--
HORVU.MOREX.r3.1HG0015550	HORVU.MOREX.r3.1HG0015550	--	0	0	0	0	0	0	0	0	0	0	0	0	0	0	0	0	0	0	0	0	0	0	0	0	0	0	0	0	0	0	0	0	0	0	0	0	--	--	--	--	--	--	--	--	--	--	--
HORVU.MOREX.r3.1HG0015570	HORVU.MOREX.r3.1HG0015570	--	0	0	0	0	0	0	0	0	0	0	0	0	0	0	0	0	0	0	0	0	0	0	0	0	0	0	0	0	0.201384	3	0	0	0	0	0	0	--	--	--	--	--	--	--	--	--	--	--
HORVU.MOREX.r3.1HG0015590	HORVU.MOREX.r3.1HG0015590	--	0	0	0	0	0	0	0	0	0	0	0	0	0	0	0.596508	16	0	0	0	0	0	0	0	0	0	0	1.45286	39	0	0	0	0	0.363423	10	0	0	--	--	--	--	--	--	--	--	--	--	--
HORVU.MOREX.r3.1HG0015600	HORVU.MOREX.r3.1HG0015600	--	15.6044	172	13.1703	142	16.4804	182	8.25066	85	9.99058	104	7.96593	89	5.63223	70	3.77265	39	5.73118	70	4.58882	48	5.60238	59	7.97292	82	9.62462	109	9.55968	98	9.59571	97	6.92731	74	8.37289	86	4.63627	47	0.0199313	-0.566683	normal	1.24375e-08	1.45801	up	0.595157	0.208378	normal	0.038923	0.672749
HORVU.MOREX.r3.1HG0015610	HORVU.MOREX.r3.1HG0015610	--	0	0	0	0	0	0	0	0	0	0	0	0	0	0	0	0	0	0	0	0	0	0	0	0	0	0	0	0	0	0	0	0	0	0	0	0	--	--	--	--	--	--	--	--	--	--	--
HORVU.MOREX.r3.1HG0015620	HORVU.MOREX.r3.1HG0015620	--	0	0	0	0	0	0	0	0	0	0	0	0	0	0	0	0	0	0	0	0	0	0	0	0	0	0	0	0	0	0	0	0	0	0	0	0	--	--	--	--	--	--	--	--	--	--	--
HORVU.MOREX.r3.1HG0015630	HORVU.MOREX.r3.1HG0015630	--	0	0	0	0	0	0	0	0	0	0	0	0	0	0	0	0	0	0	0	0	0	0	0	0	0	0	0	0	0	0	0	0	0	0	0	0	--	--	--	--	--	--	--	--	--	--	--
HORVU.MOREX.r3.1HG0015640	HORVU.MOREX.r3.1HG0015640	--	0	0	0	0	0	0	0	0	0	0	0	0	0	0	0	0	0	0	0	0	0	0	0	0	0	0	0	0	0	0	0	0	0	0	0	0	--	--	--	--	--	--	--	--	--	--	--
HORVU.MOREX.r3.1HG0015650	HORVU.MOREX.r3.1HG0015650	--	0	0	0	0	0	0	0	0	0	0	0	0	0	0	0	0	0	0	0	0	0	0	0	0	0	0	0	0	0	0	0	0	0	0	0	0	--	--	--	--	--	--	--	--	--	--	--
HORVU.MOREX.r3.1HG0015660	HORVU.MOREX.r3.1HG0015660	--	0	0	0	0	0	0	0	0	0	0	0	0	0	0	0.102401	3	0	0	0	0	0	0	0	0	0	0	0	0	0	0	0.046221	2	0.201418	6	0	0	--	--	--	--	--	--	--	--	--	--	--
HORVU.MOREX.r3.1HG0015670	HORVU.MOREX.r3.1HG0015670	--	0	0	0	0	0	0	0	0	0	0	0	0	0	0	0	0	0	0	0	0	0	0	0	0	0	0	0	0	0	0	0	0	0	0	0	0	--	--	--	--	--	--	--	--	--	--	--
HORVU.MOREX.r3.1HG0015680	HORVU.MOREX.r3.1HG0015680	--	0.03952	3	0.206186	15	0.137074	11	0.088425	6	0.029229	3	0.109051	9	0.421962	35	0.212379	15	0.833463	67	0.320942	22	0.195239	14	0.176355	12	0	0	0	0	0	0	0	0	0.029362	2	0	0	--	--	--	--	--	--	--	--	--	--	--
HORVU.MOREX.r3.1HG0015690	HORVU.MOREX.r3.1HG0015690	--	0	0	0	0	0	0	0	0	0	0	0	0	0	0	0	0	0	0	0	0	0	0	0	0	0	0	0	0	0	0	0	0	0	0	0	0	--	--	--	--	--	--	--	--	--	--	--
HORVU.MOREX.r3.1HG0015700	HORVU.MOREX.r3.1HG0015700	--	0	0	0	0	0	0	0	0	0	0	0	0	0	0	0	0	0	0	0	0	0	0	0	0	0	0	0	0	0	0	0	0	0	0	0	0	--	--	--	--	--	--	--	--	--	--	--
HORVU.MOREX.r3.1HG0015720	HORVU.MOREX.r3.1HG0015720	--	12.3609	1169	12.0818	1115	11.7248	1110	8.38881	739	7.62323	677	6.90958	658	20.9415	2211	21.1422	1862	21.8234	2274	17.7144	1567	14.9578	1354	15.9547	1401	22.8689	2216	22.8391	2009	23.8385	2058	19.661	1785	19.6072	1733	17.9904	1566	1.73547e-05	-0.460053	normal	7.70547e-34	-0.853593	normal	7.64259e-07	-0.390077	normal	2.05208e-17	-0.917848
HORVU.MOREX.r3.1HG0015730	HORVU.MOREX.r3.1HG0015730	--	0.15529	3	0.203355	4	0.124353	2	0.012405	1	0.063785	1	0.114314	2	0.186173	4	0.285132	5	0.154068	3	0.241903	4	0.056727	1	0.12255	2	0.739546	12	0.544765	8	0.363515	6	0.540934	9	0.388573	6	0.592879	9	--	--	--	--	--	--	--	--	--	--	--
HORVU.MOREX.r3.1HG0015740	HORVU.MOREX.r3.1HG0015740	--	0	0	0	0	0	0	0	0	0	0	0	0	0	0	0	0	0	0	0	0	0	0	0	0	0	0	0	0	0	0	0	0	0	0	0	0	--	--	--	--	--	--	--	--	--	--	--
HORVU.MOREX.r3.1HG0015750	HORVU.MOREX.r3.1HG0015750	LOC109736599	1.57803	108	1.85343	124	2.05519	141	2.24357	143	2.15259	139	2.22595	154	3.29996	253	4.25325	272	3.96911	300	4.8742	312	4.18943	275	6.48368	412	4.235	297	4.11296	262	4.36831	273	5.85672	385	5.1178	328	4.64308	293	0.0527394	0.452208	normal	5.01703e-08	-1.07668	down	0.0371228	0.40535	normal	1.5325e-07	-1.05087
HORVU.MOREX.r3.1HG0015760	HORVU.MOREX.r3.1HG0015760	--	11.0329	689	12.3218	752	10.2546	642	5.87886	342	5.53049	325	6.50262	409	11.7718	821	11.1175	647	12.6166	869	10.5612	617	10.3857	622	9.39949	546	10.2817	659	11.4185	664	9.97557	569	11.9266	716	12.5667	734	12.7812	735	5.55761e-08	-0.704343	normal	0.349359	-0.11486	normal	0.0653385	-0.221962	normal	7.47297e-06	-0.594971
HORVU.MOREX.r3.1HG0015770	HORVU.MOREX.r3.1HG0015770	--	0	0	0	0	0	0	0	0	0	0	0	0	0	0	0	0	0	0	0	0	0	0	0	0	0	0	0	0	0	0	0	0	0	0	0	0	--	--	--	--	--	--	--	--	--	--	--
HORVU.MOREX.r3.1HG0015780	HORVU.MOREX.r3.1HG0015780	--	0	0	0	0	0	0	0	0	0	0	0	0	0	0	0	0	0	0	0	0	0	0	0	0	0	0	0	0	0	0	0	0	0	0	0	0	--	--	--	--	--	--	--	--	--	--	--
HORVU.MOREX.r3.1HG0015790	HORVU.MOREX.r3.1HG0015790	--	0	0	0	0	0	0	0	0	0	0	0	0	0	0	0	0	0	0	0	0	0	0	0	0	0	0	0	0	0	0	0	0	0	0	0	0	--	--	--	--	--	--	--	--	--	--	--
HORVU.MOREX.r3.1HG0015800	HORVU.MOREX.r3.1HG0015800	--	0	0	0	0	0	0	0	0	0.086516	2	0	0	0	0	0	0	0	0	0	0	0	0	0	0	0	0	0	0	0	0	0	0	0	0	0	0	--	--	--	--	--	--	--	--	--	--	--
HORVU.MOREX.r3.1HG0015820	HORVU.MOREX.r3.1HG0015820	--	0	0	0	0	0	0	0	0	0	0	0	0	0	0	0	0	0	0	0	0	0	0	0	0	0	0	0	0	0	0	0	0	0	0	0	0	--	--	--	--	--	--	--	--	--	--	--
HORVU.MOREX.r3.1HG0015830	HORVU.MOREX.r3.1HG0015830	--	0	0	0	0	0	0	0	0	0	0	0	0	0	0	0	0	0	0	0	0	0	0	0	0	0	0	0	0	0	0	0	0	0	0	0	0	--	--	--	--	--	--	--	--	--	--	--
HORVU.MOREX.r3.1HG0015870	HORVU.MOREX.r3.1HG0015870	--	0.125923	2	0	0	0	0	0	0	0.065991	1	0	0	0.0528	1	0	0	0	0	0	0	0	0	0	0	0	0	0	0	0	0	0	0	0	0	0.136768	2	--	--	--	--	--	--	--	--	--	--	--
HORVU.MOREX.r3.1HG0015890	HORVU.MOREX.r3.1HG0015890	--	4.45167	546	3.96737	475	3.73103	458	3.5883	410	3.00148	346	3.69576	457	3.53593	485	3.85815	441	4.16405	563	3.9179	450	3.86848	455	3.94927	450	2.87137	361	2.72533	311	2.72932	306	3.34226	394	3.36636	386	3.46366	391	0.801115	-0.0439405	normal	0.82692	0.0349484	normal	0.905162	0.0215572	normal	0.873592	-0.0272177
HORVU.MOREX.r3.1HG0015900	HORVU.MOREX.r3.1HG0015900	--	0	0	0.174228	2	0	0	0	0	0	0	0.088604	1	0	0	0	0	0	0	0	0	0.07885	1	0	0	0.087018	1	0	0	0	0	0.157936	2	0.278646	3	0	0	--	--	--	--	--	--	--	--	--	--	--
HORVU.MOREX.r3.1HG0015960	HORVU.MOREX.r3.1HG0015960	--	0	0	0	0	0	0	0	0	0	0	0	0	0	0	0	0	0	0	0	0	0	0	0	0	0.064101	8	0.112444	13	0.071949	8	0.034162	4	0	0	0	0	--	--	--	--	--	--	--	--	--	--	--
HORVU.MOREX.r3.1HG0015970	HORVU.MOREX.r3.1HG0015970	--	0	0	0	0	0	0	0	0	0	0	0	0	0	0	0	0	0	0	0	0	0	0	0	0	0	0	0	0	0	0	0	0	0	0	0	0	--	--	--	--	--	--	--	--	--	--	--
HORVU.MOREX.r3.1HG0015980	HORVU.MOREX.r3.1HG0015980	--	0	0	0.049843	1	0	0	0	0	0	0	0	0	0	0	0	0	0	0	0	0	0	0	0	0	0	0	0	0	0	0	0	0	0	0	0	0	--	--	--	--	--	--	--	--	--	--	--
HORVU.MOREX.r3.1HG0015990	HORVU.MOREX.r3.1HG0015990	--	0	0	0	0	0	0	0	0	0	0	0	0	0	0	0	0	0	0	0	0	0	0	0	0	0.123673	4	0	0	0.163382	5	0.294932	9	0	0	0.090845	3	--	--	--	--	--	--	--	--	--	--	--
HORVU.MOREX.r3.1HG0016000	HORVU.MOREX.r3.1HG0016000	--	0	0	0	0	0	0	0	0	0	0	0	0	0	0	0	0	0	0	0	0	0	0	0	0	0.231597	4	0.232817	4	0.164552	3	0.216055	4	0	0	0.192253	3	--	--	--	--	--	--	--	--	--	--	--
HORVU.MOREX.r3.1HG0016030	HORVU.MOREX.r3.1HG0016030	--	17.025	422	18.2822	443	20.211	502	11.1735	258	11.7534	274	11.1014	277	18.8497	522	15.7979	365	18.8997	517	25.9529	602	20.8189	495	18.6509	430	10.5878	269	8.39167	194	7.18923	163	15.0202	358	13.949	324	10.8973	249	0.000690661	-0.505362	normal	0.927889	0.015291	normal	0.0860946	0.278297	normal	1.13666e-06	-0.775316
HORVU.MOREX.r3.1HG0016050	HORVU.MOREX.r3.1HG0016050	--	0	0	0	0	0	0	0	0	0	0	0	0	0	0	0.176786	4	0	0	0	0	0	0	0	0	0	0	0	0	0	0	0	0	0	0	0	0	--	--	--	--	--	--	--	--	--	--	--
HORVU.MOREX.r3.1HG0016060	HORVU.MOREX.r3.1HG0016060	--	0	0	0	0	0	0	0.148023	4	0	0	0	0	0	0	0	0	0	0	0	0	0	0	0	0	0	0	0	0	0	0	0	0	0	0	0.062332	2	--	--	--	--	--	--	--	--	--	--	--
HORVU.MOREX.r3.1HG0016070	HORVU.MOREX.r3.1HG0016070	--	0	0	0	0	0	0	0	0	0	0	0	0	0	0	0	0	0	0	0	0	0	0	0	0	0	0	0	0	0	0	0	0	0	0	0	0	--	--	--	--	--	--	--	--	--	--	--
HORVU.MOREX.r3.1HG0016090	HORVU.MOREX.r3.1HG0016090	LOC109736594	11.9749	1026	14.742	1233	12.2883	1054	14.0008	1117	11.6669	939	16.1464	1393	12.5946	1205	13.6904	1093	12.2043	1153	12.266	983	11.8561	973	12.2473	975	15.2777	1342	16.4116	1309	14.0675	1101	18.521	1524	18.5696	1487	17.6645	1394	0.0225716	0.292402	normal	0.891919	-0.0165629	normal	0.468025	-0.0797646	normal	0.00198931	0.362102
HORVU.MOREX.r3.1HG0016100	HORVU.MOREX.r3.1HG0016100	--	0.039035	2	0.03999	2	0	0	0.209615	11	0.083146	5	0.070315	4	0	0	0	0	0	0	0	0	0.081514	5	0	0	0	0	0.041948	2	0	0	0	0	0	0	0	0	--	--	--	--	--	--	--	--	--	--	--
HORVU.MOREX.r3.1HG0016110	HORVU.MOREX.r3.1HG0016110	--	30.2328	2010	27.9754	1821	28.6469	1911	24.883	1541	23.806	1497	25.7074	1729	38.0493	2854	36.7008	2298	38.7843	2880	40.7459	2562	40.4034	2596	41.9709	2610	44.6075	3076	44.8249	2798	45.5123	2792	56.4864	3653	56.1117	3528	57.1428	3531	0.792092	-0.025943	normal	2.54056e-11	-0.434879	normal	0.0943401	0.112108	normal	1.61493e-15	-0.570223
HORVU.MOREX.r3.1HG0016120	HORVU.MOREX.r3.1HG0016120	--	0	0	0	0	0	0	0	0	0	0	0	0	0	0	0	0	0	0	0	0	0	0	0	0	0	0	0	0	0	0	0	0	0	0	0	0	--	--	--	--	--	--	--	--	--	--	--
HORVU.MOREX.r3.1HG0016130	HORVU.MOREX.r3.1HG0016130	--	0	0	0	0	0	0	0	0	0	0	0	0	0	0	0	0	0	0	0	0	0	0	0	0	0	0	0	0	0	0	0	0	0	0	0	0	--	--	--	--	--	--	--	--	--	--	--
HORVU.MOREX.r3.1HG0016140	HORVU.MOREX.r3.1HG0016140	--	0	0	0	0	0	0	0	0	0	0	0	0	0	0	0	0	0	0	0	0	0	0	0	0	0	0	0	0	0	0	0	0	0	0	0	0	--	--	--	--	--	--	--	--	--	--	--
HORVU.MOREX.r3.1HG0016150	HORVU.MOREX.r3.1HG0016150	--	0	0	0	0	0	0	0	0	0	0	0	0	0	0	0	0	0	0	0	0	0	0	0	0	0	0	0	0	0	0	0	0	0	0	0	0	--	--	--	--	--	--	--	--	--	--	--
HORVU.MOREX.r3.1HG0016160	HORVU.MOREX.r3.1HG0016160	--	0	0	0	0	0	0	0	0	0	0	0	0	0	0	0	0	0	0	0	0	0	0	0	0	0	0	0	0	0	0	0	0	0	0	0	0	--	--	--	--	--	--	--	--	--	--	--
HORVU.MOREX.r3.1HG0016170	HORVU.MOREX.r3.1HG0016170	--	0	0	0	0	0	0	0	0	0	0	0	0	0	0	0	0	0	0	0	0	0	0	0	0	0	0	0	0	0	0	0	0	0	0	0	0	--	--	--	--	--	--	--	--	--	--	--
HORVU.MOREX.r3.1HG0016190	HORVU.MOREX.r3.1HG0016190	--	0	0	0	0	0	0	0	0	0	0	0	0	0	0	0	0	0	0	0	0	0	0	0	0	0.162433	2	0	0	0	0	0	0	0	0	0	0	--	--	--	--	--	--	--	--	--	--	--
HORVU.MOREX.r3.1HG0016200	HORVU.MOREX.r3.1HG0016200	--	69.9133	4494	69.013	4331	74.8409	4816	75.7766	4536	78.6769	4749	66.7971	4323	94.041	6751	98.084	5875	95.562	6772	102.88	6187	92.617	5702	90.37	5394	44.7511	2949	45.9835	2751	47.2562	2774	40.7091	2513	42.458	2551	45.5068	2694	0.00218263	0.242574	normal	1.27183e-18	-0.462644	normal	0.915027	-0.00896578	normal	0.0130583	-0.205855
HORVU.MOREX.r3.1HG0016210	HORVU.MOREX.r3.1HG0016210	--	32.211	1774	31.8591	1712	64.5111	3556	7.42862	381	6.9918	362	6.91978	384	2.51465	155	2.57523	133	2.46721	150	10.3904	536	17.5759	927	13.7675	704	0.919563	52	1.27346	66	0.924993	47	0.897373	48	0.593163	31	0.90228	46	6.8622e-11	-2.19001	down	4.02274e-27	3.68109	up	4.79078e-46	2.33384	up	1.96386e-06	-0.797811
HORVU.MOREX.r3.1HG0016220	HORVU.MOREX.r3.1HG0016220	--	0	0	0	0	0	0	0	0	0	0	0	0	0	0	0	0	0	0	0	0	0	0	0	0	0	0	0	0	0	0	0	0	0	0	0	0	--	--	--	--	--	--	--	--	--	--	--
HORVU.MOREX.r3.1HG0016230	HORVU.MOREX.r3.1HG0016230	--	0	0	0	0	0	0	0	0	0	0	0	0	0	0	0	0	0	0	0	0	0	0	0	0	0	0	0	0	0	0	0	0	0	0	0	0	--	--	--	--	--	--	--	--	--	--	--
HORVU.MOREX.r3.1HG0016240	HORVU.MOREX.r3.1HG0016240	--	0	0	0	0	0	0	0	0	0	0	0	0	0	0	0	0	0	0	0	0	0	0	0	0	0	0	0	0	0	0	0	0	0	0	0	0	--	--	--	--	--	--	--	--	--	--	--
HORVU.MOREX.r3.1HG0016250	HORVU.MOREX.r3.1HG0016250	--	7.89906	88	8.3391	91	5.81507	65	12.0629	125	14.1763	148	15.1206	169	9.57829	119	9.70994	101	9.20085	113	12.0441	126	12.4446	133	11.2147	116	7.7431	89	4.1458	43	5.34397	55	14.0403	150	11.2154	117	13.7533	141	2.06853e-05	1.04951	up	0.176423	-0.384549	normal	0.241022	0.300559	normal	0.13336	0.362837
HORVU.MOREX.r3.1HG0016260	HORVU.MOREX.r3.1HG0016260	--	7.75851	155	11.2748	220	7.52962	151	10.3673	193	13.0246	245	17.0457	343	9.04632	202	10.3287	193	9.95508	219	13.6045	254	12.3511	237	10.0344	186	4.50015	93	5.08729	95	4.89491	90	18.4763	354	14.8047	277	16.3848	302	0.00055201	0.774779	normal	0.461703	-0.175076	normal	0.187676	0.278357	normal	0.147565	0.326085
HORVU.MOREX.r3.1HG0016280	HORVU.MOREX.r3.1HG0016280	--	0.215556	4	0	0	0	0	0	0	0	0	0.201667	3	0	0	0	0	0	0	0.088392	2	0.108178	2	0.075046	1	0	0	0	0	0	0	0	0	0.359342	5	0.302741	4	--	--	--	--	--	--	--	--	--	--	--
HORVU.MOREX.r3.1HG0016290	HORVU.MOREX.r3.1HG0016290	--	0	0	0	0	0	0	0	0	0	0	0	0	0	0	0	0	0	0	0	0	0	0	0	0	0	0	0	0	0	0	0	0	0	0	0	0	--	--	--	--	--	--	--	--	--	--	--
HORVU.MOREX.r3.1HG0016300	HORVU.MOREX.r3.1HG0016300	--	0	0	0	0	0	0	0	0	0	0	0	0	0	0	0	0	0	0	0	0	0	0	0	0	0	0	0	0	0	0	0	0	0	0	0	0	--	--	--	--	--	--	--	--	--	--	--
HORVU.MOREX.r3.1HG0016310	HORVU.MOREX.r3.1HG0016310	--	99.3695	4891	107.877	5183	97.3623	4798	80.8807	3707	82.6675	3821	82.399	4083	135.29	7437	139.207	6384	142.995	7759	139.179	6409	138.962	6551	138.887	6348	148.903	7513	141.853	6497	135.921	6110	143.15	6765	135.932	6254	133.85	6066	0.0967789	-0.113962	normal	6.3596e-22	-0.490079	normal	0.977275	-0.00191556	normal	1.2502e-27	-0.598577
HORVU.MOREX.r3.1HG0016320	HORVU.MOREX.r3.1HG0016320	--	0	0	0	0	0	0	0	0	0	0	0	0	0	0	0	0	0	0	0	0	0	0	0.235728	5	0	0	0	0	0	0	0	0	0	0	0	0	--	--	--	--	--	--	--	--	--	--	--
HORVU.MOREX.r3.1HG0016330	HORVU.MOREX.r3.1HG0016330	--	0	0	0	0	0	0	0	0	0	0	0	0	0	0	0	0	0	0	0	0	0	0	0	0	0	0	0	0	0	0	0	0	0	0	0	0	--	--	--	--	--	--	--	--	--	--	--
HORVU.MOREX.r3.1HG0016340	HORVU.MOREX.r3.1HG0016340	LOC109740818	0	0	0	0	0	0	0	0	0	0	0	0	0	0	0	0	0	0	0	0	0	0	0.131603	3	0	0	0	0	0	0	0	0	0	0	0	0	--	--	--	--	--	--	--	--	--	--	--
HORVU.MOREX.r3.1HG0016360	HORVU.MOREX.r3.1HG0016360	--	0	0	0	0	0	0	0	0	0	0	0	0	0	0	0	0	0	0	0	0	0	0	0	0	0	0	0.323094	12	0	0	0	0	0	0	0.054425	3	--	--	--	--	--	--	--	--	--	--	--
HORVU.MOREX.r3.1HG0016370	HORVU.MOREX.r3.1HG0016370	--	5.17508	179	5.2791	178	6.42425	222	3.921	126	5.01161	162	5.08382	177	10.7831	415	12.3986	398	12.1506	462	7.72502	249	9.21655	304	8.81889	282	9.12882	323	10.3499	332	8.60706	271	8.40821	278	9.33443	301	9.14938	290	0.770362	-0.0740619	normal	1.24373e-11	-1.0772	down	0.00362687	-0.440429	normal	0.000287382	-0.705182
HORVU.MOREX.r3.1HG0016380	HORVU.MOREX.r3.1HG0016380	--	1.92676	38	2.64717	51	2.81393	55	2.08691	38	2.01927	37	1.34875	27	2.90319	64	5.96404	109	5.67798	123	3.40973	63	4.21512	79	3.71834	68	4.29554	86	3.86232	71	5.37155	96	3.992	75	4.14138	76	4.91995	89	0.617869	-0.220729	normal	0.00644965	-0.930569	normal	0.38517	-0.301087	normal	0.0224497	-0.861556
HORVU.MOREX.r3.1HG0016390	HORVU.MOREX.r3.1HG0016390	--	0	0	0	0	0	0	0	0	0	0	0	0	0	0	0	0	0	0	0	0	0	0	0	0	0	0	0	0	0	0	0	0	0	0	0	0	--	--	--	--	--	--	--	--	--	--	--
HORVU.MOREX.r3.1HG0016410	HORVU.MOREX.r3.1HG0016410	--	14.5541	919	13.1045	807	13.956	882	13.927	819	14.5781	864	13.2462	842	13.4552	948	10.2582	603	11.0495	769	8.97045	530	11.2081	678	11.2912	662	10.4741	678	10.4741	615	10.5002	605	8.90282	540	9.89159	584	7.60787	442	0.0728319	0.197072	normal	0.0705822	0.221526	normal	0.371056	-0.140168	normal	2.79206e-06	0.567852
HORVU.MOREX.r3.1HG0016420	HORVU.MOREX.r3.1HG0016420	--	0.642387	24	0.317941	12	0.536558	20	0.448643	16	0.731697	26	0.549256	21	1.00051	42	0.989078	35	0.568761	24	1.27004	45	0.392925	14	0.521327	19	0.864229	33	1.55192	54	0.483939	17	0.890192	32	0.488739	17	0.829542	29	--	--	--	--	--	--	0.781736	-0.142872	normal	--	--
HORVU.MOREX.r3.1HG0016430	HORVU.MOREX.r3.1HG0016430	--	0	0	0	0	0	0	0	0	0	0	0	0	0	0	0	0	0	0	0	0	0	0	0	0	0	0	0	0	0	0	0	0	0	0	0	0	--	--	--	--	--	--	--	--	--	--	--
HORVU.MOREX.r3.1HG0016440	HORVU.MOREX.r3.1HG0016440	--	0	0	0.016361	1	0.038401	1	0	0	0.116575	2	0	0	0	0	0	0	0.042662	1	0	0	0	0	0.130934	3	0.111035	3	0	0	0.052879	1	0	0	0.119334	2	0	0	--	--	--	--	--	--	--	--	--	--	--
HORVU.MOREX.r3.1HG0016450	HORVU.MOREX.r3.1HG0016450	--	15.6054	1308	16.5051	1350	16.373	1374	16.3311	1275	15.2978	1204	14.2308	1201	25.1946	2358	25.6078	2000	26.48	2446	26.17	2052	25.5781	2053	26.3785	2053	12.3272	1059	14.6052	1139	14.2116	1088	9.61778	774	8.91862	699	9.7544	753	0.262102	0.113463	normal	6.29311e-25	-0.706021	normal	0.869193	0.0151942	normal	9.72969e-13	-0.603898
HORVU.MOREX.r3.1HG0016460	HORVU.MOREX.r3.1HG0016460	--	0	0	0	0	0.172003	5	0	0	0	0	0.041992	2	0	0	0	0	0	0	0	0	0	0	0	0	0	0	0	0	0	0	0	0	0	0	0	0	--	--	--	--	--	--	--	--	--	--	--
HORVU.MOREX.r3.1HG0016480	HORVU.MOREX.r3.1HG0016480	--	1.94439	246	1.90183	235	2.00333	254	2.25757	266	2.10991	250	2.51309	320	1.37351	194	1.70289	201	1.69744	237	1.64875	195	1.61278	195	1.97895	232	0.73501	96	0.624736	74	0.81522	94	0.57927	71	0.462945	55	0.403693	47	0.0140116	0.418422	normal	0.191589	0.253141	normal	0.607094	0.123543	normal	0.00242629	0.551905
HORVU.MOREX.r3.1HG0016500	HORVU.MOREX.r3.1HG0016500	--	6.72178	425	7.28272	520	7.45276	488	5.83994	334	6.70939	390	6.19768	386	5.98238	483	7.39741	419	5.68766	416	6.63842	429	5.11877	375	5.57346	362	5.18169	345	6.32207	352	3.84076	278	4.23285	307	4.17995	274	5.52795	327	0.443843	-0.124185	normal	0.289011	0.161301	normal	0.919089	-0.0206029	normal	0.719234	0.0627727
HORVU.MOREX.r3.1HG0016510	HORVU.MOREX.r3.1HG0016510	--	0.320814	20	0.134614	8	0.21101	13	0.17329	10	0.212997	12	0.062388	4	0.024629	2	0.07159	4	0.105967	7	0.029401	2	0.084875	5	0.478737	27	0.584789	36	0.454964	26	0.172662	10	0.863271	50	0.481304	27	1.04158	58	--	--	--	--	--	--	--	--	--	--	--
HORVU.MOREX.r3.1HG0016530	HORVU.MOREX.r3.1HG0016530	--	0	0	0	0	0	0	0	0	0	0	0	0	0	0	0	0	0	0	0	0	0	0	0	0	0	0	0	0	0	0	0	0	0	0	0	0	--	--	--	--	--	--	--	--	--	--	--
HORVU.MOREX.r3.1HG0016540	HORVU.MOREX.r3.1HG0016540	--	0	0	0.182756	2	0.13053	2	0	0	0	0	0.543293	5	0	0	0	0	0	0	0	0	0	0	0	0	0	0	0	0	0	0	0.229391	3	0	0	0	0	--	--	--	--	--	--	--	--	--	--	--
HORVU.MOREX.r3.1HG0016550	HORVU.MOREX.r3.1HG0016550	--	0	0	0.035666	2	0	0	0	0	0	0	0	0	0	0	0	0	0	0	0	0	0	0	0.073727	4	0.068383	4	0.075325	4	0.142893	8	0.036504	3	0.187479	10	0.190329	10	--	--	--	--	--	--	--	--	--	--	--
HORVU.MOREX.r3.1HG0016570	HORVU.MOREX.r3.1HG0016570	--	0	0	0	0	0	0	0	0	0	0	0	0	0	0	0	0	0	0	0	0	0	0	0	0	0	0	0	0	0	0	0	0	0	0	0	0	--	--	--	--	--	--	--	--	--	--	--
HORVU.MOREX.r3.1HG0016580	HORVU.MOREX.r3.1HG0016580	--	0	0	0	0	0	0	0	0	0	0	0	0	0	0	0	0	0	0	0	0	0	0	0	0	0	0	0	0	0	0	0	0	0	0	0	0	--	--	--	--	--	--	--	--	--	--	--
HORVU.MOREX.r3.1HG0016590	HORVU.MOREX.r3.1HG0016590	--	0.108444	5	0.439393	16	0.255468	10	0	0	0.103945	4	0.053504	2	0.061663	3	0.231621	8	0.049188	2	0.260819	9	0.502544	18	0.486622	17	0.51135	20	0.173639	6	0.662027	23	0.504521	18	0.56734	20	0.315661	11	--	--	--	--	--	--	--	--	--	--	--
HORVU.MOREX.r3.1HG0016600	HORVU.MOREX.r3.1HG0016600	--	0	0	0.136495	4	0.015631	1	0	0	0	0	0	0	0	0	0	0	0.010748	1	0	0	0	0	0.079207	3	0	0	0	0	0	0	0	0	0	0	0	0	--	--	--	--	--	--	--	--	--	--	--
HORVU.MOREX.r3.1HG0016610	HORVU.MOREX.r3.1HG0016610	--	1.05366	14	1.82329	23	0.877433	12	3.00379	36	1.26882	16	1.07465	14	2.71887	39	2.1078	26	2.85804	41	2.99413	36	3.29005	41	2.94469	35	0.77807	11	1.0325	13	0.255888	3	2.19545	27	1.40406	17	1.09624	13	--	--	--	--	--	--	0.66816	0.189505	normal	0.298734	-0.56345
HORVU.MOREX.r3.1HG0016620	HORVU.MOREX.r3.1HG0016620	--	0.138288	3	0	0	0	0	0	0	0	0	0	0	0	0	0	0	0	0	0	0	0	0	0	0	0	0	0	0	0	0	0	0	0	0	0	0	--	--	--	--	--	--	--	--	--	--	--
HORVU.MOREX.r3.1HG0016630	HORVU.MOREX.r3.1HG0016630	--	0	0	0	0	0	0	0	0	0	0	0	0	0	0	0	0	0	0	0	0	0	0	0	0	0	0	0	0	0	0	0	0	0	0	0	0	--	--	--	--	--	--	--	--	--	--	--
HORVU.MOREX.r3.1HG0016660	HORVU.MOREX.r3.1HG0016660	--	0	0	0.120295	6	0	0	0	0	0	0	0	0	0.040441	3	0	0	0	0	0	0	0	0	0	0	0	0	0	0	0.098908	4	0	0	0	0	0	0	--	--	--	--	--	--	--	--	--	--	--
HORVU.MOREX.r3.1HG0016670	HORVU.MOREX.r3.1HG0016670	--	2.45933	40	1.18981	19	1.33258	22	5.70139	87	4.71915	73	5.62585	93	0	0	0	0	0	0	0	0	0.495838	8	0	0	0	0	0	0	0	0	0	0	0	0	0	0	7.31234e-07	1.71547	up	--	--	--	--	--	--	0.00346201	2.71924
HORVU.MOREX.r3.1HG0016680	HORVU.MOREX.r3.1HG0016680	--	0	0	0	0	0	0	0	0	0	0	0	0	0	0	0	0	0	0	0	0	0	0	0	0	0	0	0	0	0	0	0	0	0	0	0	0	--	--	--	--	--	--	--	--	--	--	--
HORVU.MOREX.r3.1HG0016690	HORVU.MOREX.r3.1HG0016690	--	0.366273	13	0.256375	9	0.407278	15	0.340532	11	0.143781	5	0.348452	13	0.183503	8	0	0	0.182739	7	0	0	0.308614	11	0.156448	5	0	0	0.183376	6	0	0	0	0	0	0	0	0	--	--	--	--	--	--	--	--	--	--	--
HORVU.MOREX.r3.1HG0016700	HORVU.MOREX.r3.1HG0016700	--	0	0	0	0	0	0	0	0	0	0	0	0	0	0	0	0	0	0	0	0	0	0	0	0	0	0	0	0	0	0	0	0	0	0	0	0	--	--	--	--	--	--	--	--	--	--	--
HORVU.MOREX.r3.1HG0016710	HORVU.MOREX.r3.1HG0016710	--	0.344742	16	0.305346	14	0.186427	9	0.564392	24	0.591656	26	0.356312	17	0	0	0.208327	9	0	0	0	0	0	0	0	0	0.582982	28	0.64503	25	0.398468	14	0.814663	35	0.930887	33	1.21508	46	--	--	--	--	--	--	--	--	--	--	--
HORVU.MOREX.r3.1HG0016730	HORVU.MOREX.r3.1HG0016730	--	2.19265	136	2.77106	167	1.92696	119	2.1883	126	2.04496	119	2.04779	127	1.53237	106	2.12168	122	1.33771	91	2.06099	119	2.10271	125	1.74148	100	1.12986	72	1.79099	103	1.62896	92	1.3489	80	1.39585	81	1.58693	90	0.835765	0.059241	normal	0.130474	0.413724	normal	0.461703	0.223144	normal	0.356203	0.245312
HORVU.MOREX.r3.1HG0016740	HORVU.MOREX.r3.1HG0016740	--	18.8462	1791	18.4794	1714	19.8439	1888	19.131	1693	17.0359	1520	21.8316	2088	16.8636	1790	18.0474	1598	16.7062	1750	20.4276	1816	19.7963	1802	19.7872	1746	21.3339	2078	22.2595	1968	19.4887	1691	21.0529	1921	21.8417	1940	22.8191	1996	0.0349933	0.213008	normal	0.161636	0.112378	normal	0.00333553	0.216155	normal	0.272332	0.112527
HORVU.MOREX.r3.1HG0016750	HORVU.MOREX.r3.1HG0016750	--	2.7529	163	3.65501	211	3.6594	216	2.93918	162	2.52202	140	2.4526	146	3.29045	217	3.30797	182	4.6635	303	2.98075	165	3.65009	207	3.39381	186	3.65165	221	4.00557	220	4.28905	231	4.49318	255	4.07364	225	4.13224	225	0.545256	-0.147034	normal	0.412282	-0.191632	normal	0.531862	-0.156196	normal	0.461254	-0.175836
HORVU.MOREX.r3.1HG0016760	HORVU.MOREX.r3.1HG0016760	--	8.84012	695	8.27239	636	8.61284	679	8.32235	609	7.70182	568	6.05292	478	11.433	996	11.3424	828	10.4857	906	14.2389	1048	12.6771	955	13.9273	1018	16.5304	1330	17.9305	1310	17.3344	1243	21.7263	1640	20.5805	1514	19.9417	1445	0.860677	-0.0298782	normal	7.70059e-05	-0.394316	normal	0.0018946	0.300231	normal	2.40044e-08	-0.723131
HORVU.MOREX.r3.1HG0016770	HORVU.MOREX.r3.1HG0016770	--	0.413263	30	0.469304	33	0.735501	53	0.422715	29	0.461175	31	0.326363	24	0.3093	25	0.378629	26	0.544504	43	0.440155	30	0.524915	36	0.50529	34	0.145302	11	0.278038	19	0.60644	40	0.414134	29	0.312107	21	0.322722	22	--	--	--	--	--	--	0.693365	0.18304	normal	--	--
HORVU.MOREX.r3.1HG0016780	HORVU.MOREX.r3.1HG0016780	--	0	0	0.081225	1	0.131397	1	0	0	0.045098	1	0.210323	2	0.394512	4	0.406139	3	0.57948	5	0.165648	2	0.643444	5	0.208614	2	0.920277	7	1.57525	11	1.06255	8	0.744166	6	0.12338	1	0.398273	3	--	--	--	--	--	--	--	--	--	--	--
HORVU.MOREX.r3.1HG0016790	HORVU.MOREX.r3.1HG0016790	--	43.9194	3304	44.1451	3242	43.5827	3283	42.8913	3005	38.2578	2703	46.9693	3557	83.3745	7005	77.5378	5435	78.7421	6530	57.2883	4032	59.6387	4297	59.6223	4165	141.917	10944	150.746	10553	145.918	10025	141.861	10247	140.745	9897	150.895	10452	0.0704614	0.154113	normal	3.69783e-73	-0.898375	normal	4.94173e-20	-0.439616	normal	0.000121791	-0.299647
HORVU.MOREX.r3.1HG0016800	HORVU.MOREX.r3.1HG0016800	--	0	0	0.295379	4	0.828587	12	0	0	0.167105	3	0	0	0.146765	3	0.238661	3	0.261103	4	0.448677	6	0.082956	2	0.089871	2	0	0	0.789362	10	0	0	0.290941	4	0.850555	11	0.429842	6	--	--	--	--	--	--	--	--	--	--	--
HORVU.MOREX.r3.1HG0016810	HORVU.MOREX.r3.1HG0016810	--	30.3833	2202	28.861	2042	31.894	2314	17.1196	1156	20.8506	1419	16.2285	1184	25.1151	2033	23.9229	1616	22.512	1799	19.7821	1342	21.8806	1519	21.8542	1471	20.9737	1558	24.9365	1682	23.3773	1547	25.1763	1752	25.2232	1709	24.0123	1603	3.59001e-08	-0.55238	normal	2.79555e-05	0.312726	normal	0.0428956	-0.170315	normal	0.597182	-0.0659076
HORVU.MOREX.r3.1HG0016820	HORVU.MOREX.r3.1HG0016820	--	3.34659	232	3.00271	203	2.99673	208	2.19101	142	2.39901	156	2.59108	181	2.87163	223	2.98549	193	2.12946	163	2.9518	192	2.14184	143	3.13755	202	3.51733	250	2.30829	149	3.20666	203	2.80585	187	2.812	183	3.02521	193	0.40755	-0.179328	normal	0.399791	0.185622	normal	0.887735	0.0425225	normal	0.897631	-0.0349773
HORVU.MOREX.r3.1HG0016830	HORVU.MOREX.r3.1HG0016830	--	0	0	0	0	0	0	0	0	0	0	0	0	0	0	0	0	0	0	0	0	0	0	0	0	0	0	0	0	0	0	0	0	0	0	0	0	--	--	--	--	--	--	--	--	--	--	--
HORVU.MOREX.r3.1HG0016840	HORVU.MOREX.r3.1HG0016840	--	0	0	0	0	0	0	0	0	0	0	0	0	0	0	0	0	0	0	0	0	0	0	0	0	0	0	0	0	0	0	0	0	0	0	0	0	--	--	--	--	--	--	--	--	--	--	--
HORVU.MOREX.r3.1HG0016850	HORVU.MOREX.r3.1HG0016850	--	4.939	378	4.38767	328	3.51301	269	3.532	252	3.91894	282	3.41845	263	3.6288	310	3.88537	277	3.5631	301	4.60523	330	3.28844	241	3.9279	279	3.10871	244	4.13707	295	4.12164	288	3.78118	278	3.90397	279	4.81362	339	0.833743	-0.0448788	normal	0.344895	0.174035	normal	0.684301	0.0900974	normal	0.848484	0.0419488
HORVU.MOREX.r3.1HG0016880	HORVU.MOREX.r3.1HG0016880	--	0	0	0	0	0	0	0	0	0	0	0	0	0	0	0	0	0	0	0	0	0	0	0	0	0	0	0	0	0	0	0	0	0	0	0	0	--	--	--	--	--	--	--	--	--	--	--
HORVU.MOREX.r3.1HG0016890	HORVU.MOREX.r3.1HG0016890	--	0	0	0	0	0	0	0	0	0	0	0	0	0	0	0	0	0	0	0	0	0	0	0	0	0	0	0	0	0	0	0	0	0	0	0	0	--	--	--	--	--	--	--	--	--	--	--
HORVU.MOREX.r3.1HG0016900	HORVU.MOREX.r3.1HG0016900	--	0	0	0	0	0	0	0	0	0	0	0	0	0	0	0	0	0	0	0	0	0	0	0	0	0	0	0	0	0	0	0	0	0	0	0	0	--	--	--	--	--	--	--	--	--	--	--
HORVU.MOREX.r3.1HG0016910	HORVU.MOREX.r3.1HG0016910	--	5.80566	935	5.82778	916	5.40451	871	6.43635	965	6.35993	961	8.60443	1394	3.5339	635	4.2138	632	4.44238	788	4.02271	606	4.94064	762	5.46034	816	7.59034	1252	7.2943	1093	7.67261	1128	9.33514	1442	9.15708	1378	9.09089	1347	1.80995e-05	0.517129	normal	6.33044e-05	0.444584	normal	0.105548	0.23567	normal	8.60691e-08	0.726404
HORVU.MOREX.r3.1HG0016940	HORVU.MOREX.r3.1HG0016940	--	2.58008	178	3.77541	254	4.01362	277	2.35221	151	2.43427	158	1.80564	125	3.04932	235	3.01485	194	2.79529	212	3.12463	202	2.55025	168	2.65734	170	3.98035	281	4.43645	284	3.23573	204	3.53028	234	3.68151	237	3.71345	236	0.0593144	-0.44367	normal	0.405601	0.186422	normal	0.737378	-0.0834191	normal	0.496308	-0.17208
HORVU.MOREX.r3.1HG0016950	HORVU.MOREX.r3.1HG0016950	--	14.9031	1092	14.8659	1063	15.3874	1128	19.2136	1310	20.4175	1404	22.5558	1663	11.5538	945	10.6321	726	10.1222	817	13.1429	901	15.2675	1071	13.7707	937	12.2452	919	11.6253	792	11.9982	803	14.7956	1040	15.0961	1034	15.1978	1025	3.67206e-13	0.651311	normal	1.54465e-06	0.444978	normal	0.000176835	0.378437	normal	8.49748e-14	0.719183
HORVU.MOREX.r3.1HG0016960	HORVU.MOREX.r3.1HG0016960	--	3.26755	67	2.44247	49	3.15962	65	3.58337	68	3.65143	70	4.39953	90	1.85894	43	2.57403	49	2.0564	46	2.06666	40	2.82821	55	1.63743	31	1.566	33	1.99752	38	3.05605	57	2.44457	48	1.81118	35	2.92933	55	0.0926765	0.536123	normal	0.295799	0.390406	normal	0.984115	0.00948203	normal	0.00734149	0.951958
HORVU.MOREX.r3.1HG0016970	HORVU.MOREX.r3.1HG0016970	--	0	0	0	0	0	0	0.219179	3	0	0	0	0	0	0	0	0	0	0	0.044432	1	0.075348	1	0	0	0	0	0	0	0	0	0.079975	1	0.023162	1	0.10158	2	--	--	--	--	--	--	--	--	--	--	--
HORVU.MOREX.r3.1HG0016980	HORVU.MOREX.r3.1HG0016980	--	0	0	0	0	0	0	0	0	0	0	0	0	0	0	0	0	0	0	0	0	0	0	0	0	0	0	0	0	0	0	0	0	0	0	0	0	--	--	--	--	--	--	--	--	--	--	--
HORVU.MOREX.r3.1HG0017000	HORVU.MOREX.r3.1HG0017000	LOC117128224	0	0	0	0	0	0	0	0	0	0	0	0	0	0	0	0	0	0	0	0	0.041142	2	0	0	0.199896	8	0.167066	6	0.253004	9	0.45407	17	0.286664	10	0.370974	13	--	--	--	--	--	--	--	--	--	--	--
HORVU.MOREX.r3.1HG0017020	HORVU.MOREX.r3.1HG0017020	--	0	0	0	0	0	0	0	0	0	0	0	0	0	0	0	0	0	0	0	0	0	0	0	0	0.249001	9	0.134102	4	0.401232	12	0.292013	9	0.245287	8	0.442315	13	--	--	--	--	--	--	--	--	--	--	--
HORVU.MOREX.r3.1HG0017030	HORVU.MOREX.r3.1HG0017030	--	0	0	0	0	0	0	0	0	0	0	0	0	0	0	0	0	0	0	0	0	0	0	0	0	0	0	0	0	0	0	0	0	0	0	0	0	--	--	--	--	--	--	--	--	--	--	--
HORVU.MOREX.r3.1HG0017040	HORVU.MOREX.r3.1HG0017040	--	0	0	0	0	0	0	0	0	0	0	0	0	0	0	0	0	0	0	0	0	0	0	0	0	0	0	0	0	0	0	0	0	0	0	0	0	--	--	--	--	--	--	--	--	--	--	--
HORVU.MOREX.r3.1HG0017050	HORVU.MOREX.r3.1HG0017050	LOC109750270	0.2747	11	0.273761	10	0.172183	7	0	0	0.086641	3	0.423814	16	0.887397	37	0.666605	23	0.215938	9	0.727069	25	0.278438	10	0.747062	26	0	0	0.122901	5	0.269245	9	0.159589	6	0	0	0	0	--	--	--	--	--	--	--	--	--	--	--
HORVU.MOREX.r3.1HG0017060	HORVU.MOREX.r3.1HG0017060	--	0	0	0	0	0	0	0	0	0	0	0	0	0	0	0	0	0	0	0	0	0	0	0	0	0	0	0	0	0	0	0	0	0	0	0	0	--	--	--	--	--	--	--	--	--	--	--
HORVU.MOREX.r3.1HG0017070	HORVU.MOREX.r3.1HG0017070	--	32.4571	1070	33.2504	1070	32.1962	1063	33.7277	1036	29.8396	924	32.5008	1079	33.2997	1226	44.9864	1382	37.5593	1365	36.9344	1139	40.8777	1291	40.5438	1241	26.9323	910	26.2522	806	26.1225	787	24.2689	769	20.0541	618	24.0458	730	0.102283	0.166339	normal	0.0116437	-0.275012	normal	0.833605	0.0312265	normal	0.191711	-0.137247
HORVU.MOREX.r3.1HG0017080	HORVU.MOREX.r3.1HG0017080	--	8.99809	552	9.23448	553	8.48809	522	9.52534	544	9.20833	531	9.72026	601	8.78983	602	8.08758	463	8.89062	602	9.05301	520	10.584	622	10.4093	593	8.55949	539	7.59543	434	8.72012	489	9.40806	554	9.56572	549	9.11455	515	0.0204821	0.282655	normal	0.918539	0.0146854	normal	0.103105	0.214407	normal	0.550029	0.0840986
HORVU.MOREX.r3.1HG0017090	HORVU.MOREX.r3.1HG0017090	--	0	0	0	0	0	0	0	0	0	0	0	0	0	0	0	0	0	0	0	0	0	0	0	0	0	0	0	0	0	0	0	0	0	0	0	0	--	--	--	--	--	--	--	--	--	--	--
HORVU.MOREX.r3.1HG0017100	HORVU.MOREX.r3.1HG0017100	--	0	0	0	0	0	0	0	0	0	0	0	0	0	0	0	0	0	0	0	0	0	0	0	0	0	0	0	0	0	0	0.050354	3	0	0	0.046732	2	--	--	--	--	--	--	--	--	--	--	--
HORVU.MOREX.r3.1HG0017110	HORVU.MOREX.r3.1HG0017110	--	57.1799	3943	59.8809	4031	62.1857	4293	53.607	3442	56.8738	3683	59.4961	4130	61.3634	4725	61.3788	3944	64.0994	4872	63.8878	4121	65.0385	4295	63.3838	4059	85.8341	6067	92.3575	5926	98.206	6184	105.563	6989	105.835	6821	108.475	6887	0.11264	0.116717	normal	0.115422	-0.0951834	normal	0.528517	0.040995	normal	0.839706	-0.0157152
HORVU.MOREX.r3.1HG0017120	HORVU.MOREX.r3.1HG0017120	--	0.265372	6	0.048605	1	0	0	0.204496	5	0.114532	3	0	0	0.126603	3	0.958685	19	0	0	0.142001	3	0.049537	1	0.04292	1	0.18175	4	0.050305	1	0.121916	3	0.285958	6	0.007106	1	0.103061	3	--	--	--	--	--	--	--	--	--	--	--
HORVU.MOREX.r3.1HG0017130	HORVU.MOREX.r3.1HG0017130	--	3.09104	365	3.48696	402	4.15136	491	3.33792	367	3.05975	339	4.47889	532	3.61928	477	3.86765	426	3.38965	441	3.11595	344	2.91265	330	3.58706	393	3.68441	446	3.98869	438	4.50467	486	4.60013	521	4.71746	521	4.8395	526	0.266657	0.207983	normal	0.766142	-0.0523985	normal	0.296853	-0.171667	normal	0.0571488	0.336404
HORVU.MOREX.r3.1HG0017140	HORVU.MOREX.r3.1HG0017140	--	0	0	0	0	0	0	0	0	0	0	0	0	0	0	0	0	0	0	0	0	0	0	0	0	0	0	0	0	0	0	0	0	0	0	0	0	--	--	--	--	--	--	--	--	--	--	--
HORVU.MOREX.r3.1HG0017150	HORVU.MOREX.r3.1HG0017150	--	0.203597	17	0.561094	44	0.554444	44	0.204397	15	0.114498	9	0.15763	13	0.334101	30	0.557056	41	0.253141	22	0.199187	15	0.387711	30	0.121156	9	0.172302	14	0.155434	12	0.131896	10	0.828686	63	0.487496	36	0.282225	21	--	--	--	0.761039	0.163719	normal	--	--	--	--	--
HORVU.MOREX.r3.1HG0017170	HORVU.MOREX.r3.1HG0017170	--	0	0	0	0	0	0	0	0	0	0	0	0	0	0	0	0	0	0	0	0	0	0	0	0	0	0	0	0	0	0	0	0	0	0	0	0	--	--	--	--	--	--	--	--	--	--	--
HORVU.MOREX.r3.1HG0017180	HORVU.MOREX.r3.1HG0017180	--	0	0	0	0	0	0	0	0	0	0	0	0	0	0	0	0	0	0	0	0	0	0	0	0	0	0	0	0	0	0	0	0	0	0	0	0	--	--	--	--	--	--	--	--	--	--	--
HORVU.MOREX.r3.1HG0017190	HORVU.MOREX.r3.1HG0017190	--	0	0	0	0	0	0	0	0	0	0	0	0	0	0	0	0	0	0	0	0	0	0	0	0	0	0	0	0	0	0	0	0	0	0	0	0	--	--	--	--	--	--	--	--	--	--	--
HORVU.MOREX.r3.1HG0017200	HORVU.MOREX.r3.1HG0017200	--	0.42873	9	0.777808	16	0.348844	8	0	0	0.056332	2	0.302853	7	0	0	0.194286	4	0.232462	6	0	0	0	0	0	0	0	0	0	0	0.155411	3	0.392829	8	0.081543	2	0.147368	3	--	--	--	--	--	--	--	--	--	--	--
HORVU.MOREX.r3.1HG0017240	HORVU.MOREX.r3.1HG0017240	--	38.7558	2367	41.8152	2493	43.016	2630	36.8773	2097	37.5167	2152	38.329	2357	48.5418	3311	49.175	2798	46.3041	3117	53.1424	3036	49.3124	2885	50.0298	2837	51.5211	3225	49.0859	2790	51.1894	2855	55.2456	3239	55.9783	3196	51.9037	2919	0.473325	0.0610889	normal	8.74218e-05	-0.255114	normal	0.246106	0.0822175	normal	0.000105741	-0.272702
HORVU.MOREX.r3.1HG0017250	HORVU.MOREX.r3.1HG0017250	--	15.0801	1490	12.5776	1210	13.2804	1308	13.8079	1270	14.0656	1300	15.2995	1525	13.7603	1492	12.7864	1176	11.9711	1301	13.1558	1216	14.2904	1353	13.7834	1265	13.0857	1324	12.6433	1140	12.8919	1160	16.2681	1538	14.5485	1342	14.2227	1294	0.00706349	0.270685	normal	0.580726	0.0598507	normal	0.270534	0.107627	normal	0.0121961	0.227036
HORVU.MOREX.r3.1HG0017260	HORVU.MOREX.r3.1HG0017260	--	0	0	0	0	0	0	0	0	0	0	0	0	0	0	0	0	0	0	0	0	0	0	0	0	0	0	0	0	0	0	0	0	0	0	0	0	--	--	--	--	--	--	--	--	--	--	--
HORVU.MOREX.r3.1HG0017280	HORVU.MOREX.r3.1HG0017280	--	82.3708	4584	87.042	4728	85.7991	4780	103.069	5341	114.53	5985	84.2992	4723	315.299	19594	301.276	15620	317.475	19475	321.282	16726	325.867	17367	320.159	16543	1045.15	59614	1020.54	52846	1059.96	53864	789.921	42202	757.407	39395	750.381	38445	3.32432e-06	0.434269	normal	0	-1.90502	down	0.272476	0.0499276	normal	2.62538e-69	-1.51236
HORVU.MOREX.r3.1HG0017290	HORVU.MOREX.r3.1HG0017290	--	0	0	0	0	0	0	0	0	0	0	0	0	0	0	0	0	0	0	0	0	0	0	0	0	0	0	0	0	0	0	0	0	0	0	0	0	--	--	--	--	--	--	--	--	--	--	--
HORVU.MOREX.r3.1HG0017300	HORVU.MOREX.r3.1HG0017300	--	0	0	0	0	0	0	0	0	0	0	0	0	0	0	0	0	0	0	0	0	0	0	0	0	0	0	0	0	0	0	0	0	0	0	0	0	--	--	--	--	--	--	--	--	--	--	--
HORVU.MOREX.r3.1HG0017310	HORVU.MOREX.r3.1HG0017310	--	1.52501	118	1.20162	91	1.15047	89	0.20959	15	0.272589	20	0.294197	23	0.485912	42	0.620286	45	0.33981	29	0.535949	39	1.02198	76	0.530898	38	0.168019	14	0.306966	22	0.267241	19	0.416573	31	0.373995	27	0.280067	20	1.60809e-08	-1.93061	down	5.84708e-05	1.28913	up	0.311204	0.405984	normal	0.0124346	-1.18178
HORVU.MOREX.r3.1HG0017330	HORVU.MOREX.r3.1HG0017330	--	0	0	0	0	0	0	0	0	0	0	0	0	0	0	0	0	0	0	0	0	0	0	0	0	0	0	0	0	0	0	0	0	0	0	0	0	--	--	--	--	--	--	--	--	--	--	--
HORVU.MOREX.r3.1HG0017340	HORVU.MOREX.r3.1HG0017340	--	0	0	0	0	0	0	0	0	0	0	0	0	0.18885	2	0.303839	3	0.478296	5	0	0	0	0	0	0	0.324866	3	0.276051	3	0	0	0	0	0	0	0	0	--	--	--	--	--	--	--	--	--	--	--
HORVU.MOREX.r3.1HG0017350	HORVU.MOREX.r3.1HG0017350	--	0	0	0	0	0	0	0	0	0	0	0	0	0	0	0	0	0	0	0	0	0	0	0	0	0	0	0	0	0	0	0	0	0	0	0	0	--	--	--	--	--	--	--	--	--	--	--
HORVU.MOREX.r3.1HG0017360	HORVU.MOREX.r3.1HG0017360	--	0.093296	2	0	0	0	0	0	0	0	0	0	0	0	0	0	0	0	0	0	0	0	0	0	0	0	0	0	0	0	0	0	0	0	0	0	0	--	--	--	--	--	--	--	--	--	--	--
HORVU.MOREX.r3.1HG0017370	HORVU.MOREX.r3.1HG0017370	--	0	0	0	0	0	0	0	0	0	0	0	0	0	0	0	0	0	0	0	0	0	0	0	0	0	0	0	0	0	0	0	0	0	0	0	0	--	--	--	--	--	--	--	--	--	--	--
HORVU.MOREX.r3.1HG0017380	HORVU.MOREX.r3.1HG0017380	--	0	0	0	0	0	0	0	0	0	0	0	0	0	0	0	0	0	0	0	0	0	0	0	0	0	0	0	0	0	0	0	0	0	0	0	0	--	--	--	--	--	--	--	--	--	--	--
HORVU.MOREX.r3.1HG0017390	HORVU.MOREX.r3.1HG0017390	--	0	0	0	0	0	0	0	0	0	0	0	0	0	0	0	0	0	0	0	0	0	0	0	0	0	0	0	0	0	0	0	0	0	0	0	0	--	--	--	--	--	--	--	--	--	--	--
HORVU.MOREX.r3.1HG0017400	HORVU.MOREX.r3.1HG0017400	--	0	0	0	0	0	0	0	0	0.052605	1	0	0	0	0	0	0	0	0	0	0	0	0	0	0	0	0	0	0	0	0	0	0	0	0	0	0	--	--	--	--	--	--	--	--	--	--	--
HORVU.MOREX.r3.1HG0017410	HORVU.MOREX.r3.1HG0017410	--	2.69319	150	1.52453	83	2.05028	114	7.04302	364	7.43327	387	7.70192	430	2.4768	154	2.3304	121	2.66773	163	2.08792	109	1.6933	90	1.41465	73	3.75649	214	4.09129	212	3.1646	161	2.14242	114	1.86362	97	1.93036	99	1.05189e-24	1.95569	up	0.323738	-0.27492	normal	0.0651385	-0.473116	normal	5.64475e-33	2.2266
HORVU.MOREX.r3.1HG0017420	HORVU.MOREX.r3.1HG0017420	--	1.45989	57	1.14982	44	1.13152	44	1.77642	64	1.47172	54	0.702977	28	1.76724	76	2.57242	93	2.55907	109	1.28589	47	1.14489	43	1.00783	36	4.81903	190	4.42592	159	3.34076	118	2.78151	103	1.32429	48	2.28401	81	0.583529	0.241216	normal	0.00817643	-0.841739	normal	0.0056915	-0.833278	normal	0.459047	0.346705
HORVU.MOREX.r3.1HG0017430	HORVU.MOREX.r3.1HG0017430	--	0.369397	18	0.364951	18	0.143817	8	0	0	0.08762	5	0.081726	5	0.423603	23	0.397253	18	0.373165	20	0	0	0.041518	2	0	0	0.067287	4	0	0	0	0	0	0	0	0	0	0	--	--	--	--	--	--	--	--	--	--	--
HORVU.MOREX.r3.1HG0017440	HORVU.MOREX.r3.1HG0017440	--	9.63904	695	9.3091	655	8.60933	621	6.96603	468	8.33971	565	7.19141	522	7.21097	581	8.28431	557	5.81344	462	7.21804	487	6.9038	477	7.79938	522	5.5717	412	6.62909	445	6.5882	434	7.49487	519	6.51843	439	7.59431	504	0.495371	-0.0968259	normal	0.0170265	0.332319	normal	0.835574	0.0409252	normal	0.160172	0.199662
HORVU.MOREX.r3.1HG0017450	HORVU.MOREX.r3.1HG0017450	--	0	0	0	0	0.065513	1	0	0	0	0	0	0	0	0	0	0	0	0	0	0	0	0	0	0	0	0	0	0	0	0	0	0	0	0	0	0	--	--	--	--	--	--	--	--	--	--	--
HORVU.MOREX.r3.1HG0017460	HORVU.MOREX.r3.1HG0017460	--	0.14916	8	0.144134	7	0.485059	24	0.889725	41	0.671217	31	0.832987	41	0.723606	40	0.648762	30	1.37741	75	0.183971	9	0.128357	6	0.194766	9	1.10111	56	1.19601	55	2.04422	92	0.508195	24	0.364756	17	0.550702	25	--	--	--	--	--	--	--	--	--	--	--
HORVU.MOREX.r3.1HG0017480	HORVU.MOREX.r3.1HG0017480	--	0	0	0	0	0	0	0	0	0	0	0	0	0	0	0	0	0	0	0	0	0	0	0	0	0.175255	7	0	0	0.125536	5	0	0	0	0	0	0	--	--	--	--	--	--	--	--	--	--	--
HORVU.MOREX.r3.1HG0017490	HORVU.MOREX.r3.1HG0017490	--	0	0	0	0	0	0	0.143076	7	0	0	0	0	0.234843	13	0	0	0.120852	7	0	0	0	0	0	0	0	0	0.008766	1	0	0	0.089182	5	0	0	0.048768	3	--	--	--	--	--	--	--	--	--	--	--
HORVU.MOREX.r3.1HG0017500	HORVU.MOREX.r3.1HG0017500	--	0	0	0	0	0	0	0	0	0	0	0	0	0	0	0	0	0	0	0	0	0.017652	1	0	0	0	0	0	0	0	0	0	0	0	0	0	0	--	--	--	--	--	--	--	--	--	--	--
HORVU.MOREX.r3.1HG0017510	HORVU.MOREX.r3.1HG0017510	--	0	0	0	0	0	0	0	0	0	0	0	0	0	0	0	0	0	0	0	0	0	0	0	0	0	0	0	0	0	0	0	0	0	0	0	0	--	--	--	--	--	--	--	--	--	--	--
HORVU.MOREX.r3.1HG0017520	HORVU.MOREX.r3.1HG0017520	--	0	0	0	0	0	0	0	0	0	0	0	0	0	0	0	0	0	0	0	0	0.033915	1	0.05614	2	0	0	0	0	0	0	0	0	0	0	0	0	--	--	--	--	--	--	--	--	--	--	--
HORVU.MOREX.r3.1HG0017530	HORVU.MOREX.r3.1HG0017530	--	0	0	0	0	0	0	0	0	0	0	0	0	0	0	0	0	0	0	0	0	0.033915	1	0	0	0	0	0	0	0	0	0	0	0	0	0	0	--	--	--	--	--	--	--	--	--	--	--
HORVU.MOREX.r3.1HG0017540	HORVU.MOREX.r3.1HG0017540	--	3.1374	46	3.45925	50	3.84401	57	1.13626	16	0.625015	9	1.23046	19	3.74695	61	3.76453	52	6.0603	98	1.72303	24	1.08556	16	1.09508	15	3.77121	57	5.94965	81	5.1335	69	0.495485	7	0.327877	5	0.508233	7	0.00178658	-1.34124	down	0.307913	-0.376536	normal	9.52517e-05	-1.33035	down	--	--
HORVU.MOREX.r3.1HG0017550	HORVU.MOREX.r3.1HG0017550	--	1.01226	10	0.997368	10	2.53101	25	0.580705	6	0.230491	3	0.54124	6	1.51568	17	2.8564	26	2.83578	31	0.939395	9	0.417281	4	1.30983	12	3.30262	33	2.82724	26	2.4221	22	0.576865	6	0.716071	7	0.679643	7	--	--	--	--	--	--	--	--	--	--	--
HORVU.MOREX.r3.1HG0017560	HORVU.MOREX.r3.1HG0017560	--	0	0	0	0	0	0	0	0	0	0	0	0	0	0	0	0	0	0	0	0	0	0	0	0	0	0	0	0	0	0	0	0	0	0	0	0	--	--	--	--	--	--	--	--	--	--	--
HORVU.MOREX.r3.1HG0017570	HORVU.MOREX.r3.1HG0017570	--	0	0	0	0	0	0	0	0	0	0	0	0	0	0	0	0	0	0	0	0	0	0	0	0	0	0	0	0	0	0	0	0	0	0	0	0	--	--	--	--	--	--	--	--	--	--	--
HORVU.MOREX.r3.1HG0017580	HORVU.MOREX.r3.1HG0017580	--	0	0	0	0	0	0	0	0	0	0	0	0	0	0	0	0	0	0	0	0	0	0	0	0	0	0	0	0	0	0	0	0	0	0	0	0	--	--	--	--	--	--	--	--	--	--	--
HORVU.MOREX.r3.1HG0017590	HORVU.MOREX.r3.1HG0017590	--	0	0	0	0	0	0	0	0	0	0	0	0	0	0	0	0	0	0	0	0	0	0	0	0	0	0	0	0	0	0	0	0	0	0	0	0	--	--	--	--	--	--	--	--	--	--	--
HORVU.MOREX.r3.1HG0017600	HORVU.MOREX.r3.1HG0017600	--	0	0	0	0	0	0	0	0	0	0	0	0	0	0	0.104692	2	0.18467	3	0	0	0	0	0	0	0.070555	1	0	0	0	0	0	0	0	0	0	0	--	--	--	--	--	--	--	--	--	--	--
HORVU.MOREX.r3.1HG0017610	HORVU.MOREX.r3.1HG0017610	--	0	0	0	0	0	0	0.089284	1	0	0	0	0	0	0	0	0	0	0	0	0	0	0	0	0	0	0	0	0	0	0	0	0	0.085853	1	0	0	--	--	--	--	--	--	--	--	--	--	--
HORVU.MOREX.r3.1HG0017620	HORVU.MOREX.r3.1HG0017620	LOC109773050	74.2773	3753	84.1257	4149	93.3511	4722	64.7297	3046	66.9787	3178	58.2169	2962	363.686	20521	359.126	16907	394.069	21949	393.558	18603	412.025	19939	423.003	19846	256.583	13289	259.631	12208	263.127	12141	182.878	8872	186.089	8789	171.997	8002	0.0251777	-0.21123	normal	1.24255e-88	-2.16596	down	0.00508363	0.136329	normal	0	-2.52673
HORVU.MOREX.r3.1HG0017630	HORVU.MOREX.r3.1HG0017630	--	0	0	0	0	0	0	0.476537	26	0.866086	47	0.672673	39	0	0	0	0	0	0	0	0	0.018405	1	0	0	0	0	0	0	0	0	0	0	0	0	0	0	--	--	--	--	--	--	--	--	--	--	--
HORVU.MOREX.r3.1HG0017650	HORVU.MOREX.r3.1HG0017650	--	0	0	0	0	0	0	0	0	0	0	0	0	0	0	0	0	0	0	0	0	0	0	0	0	0	0	0	0	0	0	0	0	0	0	0	0	--	--	--	--	--	--	--	--	--	--	--
HORVU.MOREX.r3.1HG0017660	HORVU.MOREX.r3.1HG0017660	--	0	0	0	0	0	0	0	0	0	0	0	0	0	0	0	0	0	0	0	0	0	0	0	0	0	0	0	0	0	0	0	0	0	0	0	0	--	--	--	--	--	--	--	--	--	--	--
HORVU.MOREX.r3.1HG0017670	HORVU.MOREX.r3.1HG0017670	--	2.80534	59	3.08524	63	2.74288	58	0.922575	18	1.33095	27	1.36114	29	2.15565	51	3.55384	70	3.55822	82	4.62537	91	2.9835	60	2.63216	51	4.85677	104	2.52099	49	4.63991	89	3.90927	79	2.61107	51	3.68029	71	0.0148576	-0.935914	normal	0.737963	-0.128884	normal	0.77994	0.116217	normal	0.00249829	-1.25239
HORVU.MOREX.r3.1HG0017680	HORVU.MOREX.r3.1HG0017680	--	0	0	0	0	0	0	0	0	0	0	0	0	0	0	0	0	0	0	0	0	0	0	0	0	0	0	0	0	0	0	0	0	0	0	0	0	--	--	--	--	--	--	--	--	--	--	--
HORVU.MOREX.r3.1HG0017690	HORVU.MOREX.r3.1HG0017690	--	0	0	0	0	0	0	0	0	0	0	0	0	0	0	0	0	0	0	0	0	0	0	0	0	0	0	0	0	0	0	0	0	0	0	0	0	--	--	--	--	--	--	--	--	--	--	--
HORVU.MOREX.r3.1HG0017700	HORVU.MOREX.r3.1HG0017700	--	0	0	0	0	0	0	0	0	0	0	0	0	0.370538	20	0.092813	5	0.348998	18	0	0	0.177691	8	0	0	0.042139	3	0	0	0	0	0	0	0	0	0	0	--	--	--	--	--	--	--	--	--	--	--
HORVU.MOREX.r3.1HG0017720	HORVU.MOREX.r3.1HG0017720	--	224.796	8821	245.149	9390	225.422	8856	142.152	5194	153.031	5639	131.809	5207	441.679	19355	420.599	15378	446.756	19325	304.989	11196	303.56	11409	305.573	11134	221.513	8910	205.541	7506	217.447	7793	120.875	4554	112.022	4109	108.937	3936	1.46502e-13	-0.507492	normal	2.46426e-101	-0.947451	normal	5.97308e-42	-0.517136	normal	1.12442e-47	-0.93379
HORVU.MOREX.r3.1HG0017730	HORVU.MOREX.r3.1HG0017730	--	0.765331	42	0.964017	51	0.458077	25	0.543832	28	0.367815	19	0.536311	29	0.782587	47	0.188934	10	0.5213	31	0.238857	13	0.165651	9	0.487583	25	0.333416	19	0.161553	9	0.033033	2	0.508803	27	0.422083	22	0.16908	9	--	--	--	0.403324	0.428	normal	--	--	--	--	--
HORVU.MOREX.r3.1HG0017740	HORVU.MOREX.r3.1HG0017740	--	0	0	0	0	0	0	0.652471	10	0.380864	6	0.185057	3	0	0	0	0	0	0	0	0	0	0	0	0	0	0	0	0	0	0	0	0	0	0	0	0	--	--	--	--	--	--	--	--	--	--	--
HORVU.MOREX.r3.1HG0017750	HORVU.MOREX.r3.1HG0017750	--	62.7526	3802	63.0178	3725	66.4952	3968	46.2515	2599	46.9883	2653	47.9651	2880	84.6954	5715	79.8372	4510	84.1455	5532	53.6321	3020	53.8463	3089	57.2706	3191	61.8697	3894	62.8737	3546	60.5292	3335	39.558	2302	35.4702	2007	35.1373	1954	9.293e-05	-0.255621	normal	3.96184e-15	-0.40573	normal	1.46582e-31	-0.596528	normal	0.429625	-0.0595078
HORVU.MOREX.r3.1HG0017760	HORVU.MOREX.r3.1HG0017760	--	3.29257	215	3.05567	195	3.88316	254	13.6159	828	14.5796	894	14.3898	946	2.03281	149	1.88757	115	2.54024	183	1.9368	119	2.87445	180	1.74931	106	1.51359	102	1.45215	89	0.973692	59	0.749825	47	0.982689	60	1.22012	74	4.36809e-71	2.22333	up	0.00413809	0.605627	normal	0.958295	0.018047	normal	1.78506e-73	2.83376
HORVU.MOREX.r3.1HG0017770	HORVU.MOREX.r3.1HG0017770	--	4.86784	192	3.48294	134	3.17084	126	0.843787	31	1.27044	47	1.49719	60	2.89201	128	3.52086	130	2.73744	119	2.94969	109	2.70908	103	2.85115	105	11.2781	456	11.4798	421	8.64882	312	11.6313	440	12.7403	470	12.5775	457	2.46215e-06	-1.38316	down	0.283574	0.285212	normal	0.77003	-0.0912239	normal	0.00111467	-1.04242
HORVU.MOREX.r3.1HG0017780	HORVU.MOREX.r3.1HG0017780	--	0	0	0	0	0	0	0	0	0	0	0	0	0	0	0	0	0	0	0	0	0	0	0	0	0	0	0	0	0	0	0	0	0	0	0	0	--	--	--	--	--	--	--	--	--	--	--
HORVU.MOREX.r3.1HG0017790	HORVU.MOREX.r3.1HG0017790	--	0	0	0	0	0	0	0	0	0	0	0	0	0	0	0	0	0	0	0	0	0	0	0.019916	2	0.151905	9	0.039745	3	0.120149	6	0.429526	23	0.789398	40	0.276505	14	--	--	--	--	--	--	--	--	--	--	--
HORVU.MOREX.r3.1HG0017800	HORVU.MOREX.r3.1HG0017800	--	0	0	0	0	0	0	0	0	0	0	0	0	0	0	0	0	0	0	0	0	0	0	0	0	0	0	0	0	0	0	0	0	0	0	0	0	--	--	--	--	--	--	--	--	--	--	--
HORVU.MOREX.r3.1HG0017820	HORVU.MOREX.r3.1HG0017820	--	0	0	0	0	0	0	0	0	0	0	0	0	0	0	0	0	0	0	0	0	0	0	0	0	0	0	0	0	0	0	0	0	0	0	0	0	--	--	--	--	--	--	--	--	--	--	--
HORVU.MOREX.r3.1HG0017830	HORVU.MOREX.r3.1HG0017830	--	0	0	0	0	0	0	0	0	0	0	0	0	0	0	0	0	0	0	0	0	0	0	0	0	0	0	0	0	0	0	0	0	0	0	0	0	--	--	--	--	--	--	--	--	--	--	--
HORVU.MOREX.r3.1HG0017840	HORVU.MOREX.r3.1HG0017840	--	0	0	0	0	0	0	0	0	0	0	0	0	0	0	0	0	0	0	0	0	0	0	0	0	0	0	0	0	0	0	0	0	0	0	0	0	--	--	--	--	--	--	--	--	--	--	--
HORVU.MOREX.r3.1HG0017850	HORVU.MOREX.r3.1HG0017850	--	0	0	0	0	0	0	0	0	0	0	0	0	0	0	0	0	0	0	0	0	0	0	0	0	0	0	0	0	0	0	0	0	0	0	0	0	--	--	--	--	--	--	--	--	--	--	--
HORVU.MOREX.r3.1HG0017870	HORVU.MOREX.r3.1HG0017870	--	7.38477	366	7.21252	349	7.73726	384	5.89336	272	5.98796	279	5.50617	275	5.77819	320	5.2251	241	5.22034	285	6.03935	280	6.55414	311	6.24487	287	6.13238	312	5.41863	250	7.77534	352	7.21138	343	8.70129	403	7.70057	351	0.322098	-0.164438	normal	0.00533555	0.419952	normal	0.244504	0.206202	normal	0.8017	0.0484531
HORVU.MOREX.r3.1HG0017880	HORVU.MOREX.r3.1HG0017880	--	12.3849	1501	12.094	1431	12.1479	1474	6.39701	722	5.12326	583	5.721	698	10.0033	1354	9.268	1047	8.66172	1157	8.12051	921	8.36476	971	8.42157	948	7.73013	961	8.22421	928	7.08957	785	8.19384	954	8.19117	928	7.31886	817	2.3176e-18	-0.886405	normal	2.02826e-05	0.353809	normal	0.10296	-0.163311	normal	0.00148339	-0.366555
HORVU.MOREX.r3.1HG0017890	HORVU.MOREX.r3.1HG0017890	--	9.01039	512	10.0553	558	8.95549	509	5.74531	304	5.26898	281	6.59438	377	7.21764	458	7.44194	394	7.74011	485	6.87166	365	7.36556	401	7.92024	418	5.78928	337	6.64809	352	5.8552	304	6.40673	350	6.99462	372	7.6711	401	0.00114171	-0.469037	normal	0.026946	0.283498	normal	0.932231	-0.0161571	normal	0.31942	-0.168004
HORVU.MOREX.r3.1HG0017900	HORVU.MOREX.r3.1HG0017900	--	0	0	0.277555	6	0	0	0	0	0	0	0	0	0	0	0.047098	1	0.04327	2	0	0	0.202197	5	0	0	0	0	0.079961	2	0.052231	2	0.198724	5	0	0	0	0	--	--	--	--	--	--	--	--	--	--	--
HORVU.MOREX.r3.1HG0017910	HORVU.MOREX.r3.1HG0017910	--	0	0	0	0	0	0	0	0	0	0	0	0	0	0	0	0	0	0	0	0	0	0	0	0	0	0	0	0	0	0	0	0	0	0	0	0	--	--	--	--	--	--	--	--	--	--	--
HORVU.MOREX.r3.1HG0017920	HORVU.MOREX.r3.1HG0017920	--	0	0	0	0	0	0	0	0	0	0	0	0	0	0	0	0	0	0	0	0	0	0	0	0	0	0	0	0	0	0	0	0	0	0	0	0	--	--	--	--	--	--	--	--	--	--	--
HORVU.MOREX.r3.1HG0017930	HORVU.MOREX.r3.1HG0017930	--	10.0459	526	10.0967	517	7.94899	417	8.63835	422	8.68193	427	9.41278	497	13.5541	793	16.4295	802	15.1534	875	16.5075	809	16.235	815	14.5774	709	11.7012	628	15.8106	771	12.7746	611	12.3696	622	12.1306	594	12.4099	599	0.438224	0.122266	normal	1.01051e-08	-0.711791	normal	0.63316	0.0681781	normal	2.20958e-08	-0.657625
HORVU.MOREX.r3.1HG0017940	HORVU.MOREX.r3.1HG0017940	--	0	0	0	0	0	0	0	0	0	0	0	0	0	0	0	0	0	0	0	0	0	0	0	0	0	0	0	0	0	0	0	0	0	0	0	0	--	--	--	--	--	--	--	--	--	--	--
HORVU.MOREX.r3.1HG0017950	HORVU.MOREX.r3.1HG0017950	--	0	0	0	0	0	0	0	0	0	0	0	0	0	0	0	0	0	0	0	0	0	0	0	0	0	0	0	0	0	0	0	0	0	0	0	0	--	--	--	--	--	--	--	--	--	--	--
HORVU.MOREX.r3.1HG0017960	HORVU.MOREX.r3.1HG0017960	--	0	0	0	0	0	0	0	0	0	0	0	0	0	0	0	0	0	0	0	0	0	0	0	0	0	0	0	0	0	0	0	0	0	0	0	0	--	--	--	--	--	--	--	--	--	--	--
HORVU.MOREX.r3.1HG0017980	HORVU.MOREX.r3.1HG0017980	--	49.2492	3247	51.5414	3317	50.0032	3300	57.5969	3536	57.9298	3586	57.0408	3786	63.7996	4697	73.9788	4544	71.3409	5185	68.014	4195	65.0907	4110	66.0502	4044	91.1433	6159	89.0188	5461	92.1628	5549	80.7049	5108	78.7103	4850	78.2791	4752	3.85096e-10	0.387659	normal	5.43927e-16	-0.505815	normal	0.35808	-0.0697568	normal	0.535767	-0.0439575
HORVU.MOREX.r3.1HG0017990	HORVU.MOREX.r3.1HG0017990	--	0	0	0	0	0	0	0	0	0	0	0	0	0	0	0	0	0	0	0	0	0	0	0	0	0	0	0	0	0	0	0	0	0	0	0	0	--	--	--	--	--	--	--	--	--	--	--
HORVU.MOREX.r3.1HG0018000	HORVU.MOREX.r3.1HG0018000	--	0	0	0	0	0	0	0	0	0	0	0	0	0	0	0	0	0	0	0.048726	2	0	0	0	0	0	0	0	0	0	0	0	0	0	0	0	0	--	--	--	--	--	--	--	--	--	--	--
HORVU.MOREX.r3.1HG0018010	HORVU.MOREX.r3.1HG0018010	--	0	0	0	0	0	0	0	0	0	0	0	0	0	0	0	0	0.021038	1	0	0	0	0	0	0	0	0	0	0	0	0	0	0	0	0	0	0	--	--	--	--	--	--	--	--	--	--	--
HORVU.MOREX.r3.1HG0018020	HORVU.MOREX.r3.1HG0018020	--	0	0	0.107814	5	0	0	0	0	0	0	0	0	0	0	0.142177	6	0.2585	13	0.233482	10	0	0	0.071331	3	0	0	0	0	0	0	0	0	0	0	0	0	--	--	--	--	--	--	--	--	--	--	--
HORVU.MOREX.r3.1HG0018030	HORVU.MOREX.r3.1HG0018030	--	0.07344	2	0	0	0	0	0.083907	2	0.082098	2	0.077609	2	0.172567	5	0.034659	1	0	0	0.249982	6	0.243634	6	0.237834	6	0.354168	10	0.425663	11	0.420914	10	0.216458	6	0.565596	14	0.339141	8	--	--	--	--	--	--	--	--	--	--	--
HORVU.MOREX.r3.1HG0018050	HORVU.MOREX.r3.1HG0018050	--	1.03146	64	2.22265	135	2.39445	149	1.24324	72	2.20874	129	0.802252	50	11.3314	784	12.015	693	11.693	798	9.32538	540	8.85063	525	9.42088	542	22.3029	1415	23.3933	1348	23.6636	1338	20.5246	1220	21.9567	1271	19.451	1109	0.637217	-0.19619	normal	9.80125e-14	-2.44477	down	0.00201153	-0.33785	normal	2.11234e-09	-2.39922
HORVU.MOREX.r3.1HG0018060	HORVU.MOREX.r3.1HG0018060	--	0	0	0	0	0	0	0	0	0	0	0	0	0	0	0	0	0	0	0	0	0	0	0	0	0	0	0	0	0	0	0	0	0	0	0	0	--	--	--	--	--	--	--	--	--	--	--
HORVU.MOREX.r3.1HG0018070	HORVU.MOREX.r3.1HG0018070	--	0	0	0	0	0	0	0	0	0	0	0	0	0	0	0	0	0	0	0	0	0	0	0	0	0	0	0	0	0	0	0	0	0	0	0	0	--	--	--	--	--	--	--	--	--	--	--
HORVU.MOREX.r3.1HG0018080	HORVU.MOREX.r3.1HG0018080	LOC109751064	0	0	0	0	0	0	0	0	0	0	0	0	0	0	0	0	0	0	0	0	0	0	0	0	0	0	0	0	0	0	0	0	0	0	0	0	--	--	--	--	--	--	--	--	--	--	--
HORVU.MOREX.r3.1HG0018090	HORVU.MOREX.r3.1HG0018090	LOC109751064	0	0	0	0	0	0	0	0	0	0	0	0	0	0	0	0	0	0	0	0	0	0	0	0	0	0	0	0	0	0	0.053654	1	0	0	0	0	--	--	--	--	--	--	--	--	--	--	--
HORVU.MOREX.r3.1HG0018100	HORVU.MOREX.r3.1HG0018100	--	0	0	0	0	0	0	0	0	0	0	0	0	0	0	0	0	0	0	0	0	0	0	0	0	0	0	0	0	0	0	0	0	0	0	0	0	--	--	--	--	--	--	--	--	--	--	--
HORVU.MOREX.r3.1HG0018110	HORVU.MOREX.r3.1HG0018110	--	119.432	18197	123.138	18314	127.666	19473	86.4854	12270	86.7036	12404	92.5276	14192	173.399	29504	175.967	24980	174.178	29255	159.575	22746	150.366	21943	164.655	23295	212.042	33116	211.038	29922	207.842	28920	218.396	31948	215.313	30664	213.596	29964	3.41972e-07	-0.284237	normal	3.85671e-42	-0.534666	normal	0.000798731	-0.141449	normal	1.43795e-36	-0.673729
HORVU.MOREX.r3.1HG0018130	HORVU.MOREX.r3.1HG0018130	--	32.6148	1776	34.1452	1815	30.1455	1644	29.9694	1520	26.0844	1334	29.6858	1628	35.5026	2159	39.0215	1980	34.4755	2070	43.1993	2201	41.9793	2190	40.8159	2064	35.1896	1965	40.4794	2052	37.1183	1846	42.1801	2206	43.4744	2213	42.5857	2135	0.873259	0.0180759	normal	0.00961806	-0.204167	normal	0.00496503	0.208309	normal	2.96852e-06	-0.391634
HORVU.MOREX.r3.1HG0018140	HORVU.MOREX.r3.1HG0018140	--	0	0	0.252767	6	0.372054	9	1.70745	36	1.11032	24	2.10651	48	0	0	0	0	0	0	0	0	0	0	0.281009	6	0	0	0	0	0	0	0	0	0	0	0	0	--	--	--	--	--	--	--	--	--	--	--
HORVU.MOREX.r3.1HG0018150	HORVU.MOREX.r3.1HG0018150	--	1.77894	82	2.01661	90	1.56886	72	0.436883	19	0.399444	18	0.411646	19	2.21765	113	2.39677	102	1.98679	100	1.17914	51	1.90596	84	1.48286	63	23.2756	1088	22.5484	957	26.6453	1110	42.6424	1867	45.965	1959	48.7223	2046	1.92125e-06	-1.69784	down	0.282201	-0.31178	normal	0.129914	-0.452177	normal	0.000120107	-1.59502
HORVU.MOREX.r3.1HG0018160	HORVU.MOREX.r3.1HG0018160	--	9.28529	304	9.44741	302	8.07476	265	4.34725	133	4.8586	150	5.09676	168	13.7481	503	10.6257	325	12.1287	438	9.34086	287	9.6513	303	10.05	306	5.37602	181	7.04856	215	7.20716	216	4.97839	157	5.62474	173	4.75296	144	0.000158234	-0.692509	normal	0.00221216	-0.47667	normal	0.0461269	-0.318972	normal	2.20147e-06	-0.849964
HORVU.MOREX.r3.1HG0018170	HORVU.MOREX.r3.1HG0018170	--	30.2418	1576	29.6861	1510	25.8631	1349	17.1873	834	17.5298	858	17.27	906	28.4185	1654	27.8261	1351	26.4257	1518	25.2141	1229	23.2342	1160	25.2078	1220	24.0104	1283	19.9659	968	23.6922	1128	16.8872	845	15.5413	757	21.0349	1009	3.02049e-08	-0.524921	normal	0.86491	0.0173292	normal	0.0602394	-0.164776	normal	0.000334105	-0.338975
HORVU.MOREX.r3.1HG0018190	HORVU.MOREX.r3.1HG0018190	--	57.0471	4417	55.1251	4164	55.604	4311	53.6296	3863	56.761	4125	55.2865	4307	79.9919	6914	77.5912	5596	77.7079	6631	106.26	7690	105.568	7824	106.373	7646	44.3163	3515	43.8603	3160	42.9784	3038	61.8985	4599	59.0638	4272	59.546	4240	0.00636648	0.174407	normal	7.19585e-29	-0.522369	normal	1.1144e-26	0.433486	normal	8.58486e-46	-0.778278
HORVU.MOREX.r3.1HG0018200	HORVU.MOREX.r3.1HG0018200	LOC104582762	2.60678	82	1.55562	48	1.45206	46	1.57268	46	1.85114	55	1.06962	34	2.1431	75	1.31523	39	1.41048	49	1.99879	59	1.5888	48	1.08637	32	1.09325	35	1.55982	46	1.37653	40	1.60587	49	0.992028	29	1.64924	48	0.793748	-0.116699	normal	0.717513	0.153547	normal	0.923321	-0.0449563	normal	0.84072	0.0981873
HORVU.MOREX.r3.1HG0018210	HORVU.MOREX.r3.1HG0018210	--	20.8842	694	19.0143	616	20.0824	668	23.1163	715	23.3561	728	20.4693	684	36.6507	1359	36.9321	1142	38.2982	1402	32.6632	1015	28.4605	905	32.6374	1006	18.2555	621	17.4652	540	16.8626	512	17.6186	562	17.2312	535	16.7482	512	0.00293479	0.348107	normal	2.17021e-25	-0.928787	normal	0.00749062	-0.251899	normal	0.00492297	-0.321843
HORVU.MOREX.r3.1HG0018230	HORVU.MOREX.r3.1HG0018230	--	0	0	0.425822	5	0.208489	3	0	0	0.269784	3	0	0	0	0	0	0	0	0	0	0	0	0	0	0	0	0	0	0	0	0	0	0	0	0	0	0	--	--	--	--	--	--	--	--	--	--	--
HORVU.MOREX.r3.1HG0018240	HORVU.MOREX.r3.1HG0018240	--	2.43138	76	4.10719	125	1.62599	51	0.301165	9	0.608466	18	0.63489	20	13.4029	467	14.1632	412	13.6135	468	12.6505	369	12.3501	369	10.4919	304	40.7002	1301	42.7149	1239	40.9215	1165	53.3045	1596	48.7565	1421	45.5706	1308	3.61037e-06	-1.89768	down	7.59088e-25	-2.28711	down	0.188381	-0.207433	normal	6.24976e-52	-4.22782
HORVU.MOREX.r3.1HG0018250	HORVU.MOREX.r3.1HG0018250	--	0	0	0	0	0.09281	4	0.149678	6	0.098293	4	0	0	0.275387	14	0	0	0.604472	29	0	0	0.242526	10	0	0	0	0	0.248115	10	0.101232	4	0	0	0	0	0.098559	4	--	--	--	--	--	--	--	--	--	--	--
HORVU.MOREX.r3.1HG0018260	HORVU.MOREX.r3.1HG0018260	LOC100838178	83.0214	2569	93.7047	2831	91.0233	2820	99.2812	2861	79.7114	2316	86.6888	2701	227.579	7865	265.617	7658	255.817	8726	265.331	7681	267.957	7942	238.98	6867	318.533	10104	317.534	9144	288.767	8160	251.273	7465	252.52	7304	252.66	7199	0.0575907	0.182374	normal	1.15684e-122	-1.51513	down	0.59789	0.0439246	normal	3.23394e-63	-1.37331
HORVU.MOREX.r3.1HG0018270	HORVU.MOREX.r3.1HG0018270	--	55.822	2345	51.8946	2128	56.5335	2378	56.4969	2210	52.8613	2085	48.2791	2042	53.5238	2511	51.1184	2001	52.6081	2436	49.8816	1961	52.2823	2104	48.1559	1879	37.6059	1620	37.8593	1480	36.6898	1408	40.5295	1635	36.7023	1442	38.1414	1476	0.147496	0.133739	normal	0.736279	0.0274296	normal	0.429962	-0.0645999	normal	0.00956467	0.230808
HORVU.MOREX.r3.1HG0018280	HORVU.MOREX.r3.1HG0018280	--	0.6213	20	0.761809	24	0.744206	24	0.941577	28	0.770774	23	0.753187	24	1.15135	41	0.716349	22	1.00284	35	0.954348	29	0.968421	30	1.05403	31	0.68943	23	1.15976	34	1.14309	33	0.99119	30	1.46378	44	1.5066	44	--	--	--	--	--	--	--	--	--	--	--
HORVU.MOREX.r3.1HG0018290	HORVU.MOREX.r3.1HG0018290	--	3.11977	91	3.25042	92	2.92688	85	2.60104	71	2.94311	80	3.08466	90	3.01486	98	2.682	73	3.49689	112	2.79921	76	2.116	59	0.887121	24	2.0529	61	1.46996	40	2.63713	70	2.88409	81	1.96106	54	1.99262	54	0.799282	0.0831561	normal	0.941152	-0.024119	normal	0.132002	-0.534044	normal	0.0787107	0.701422
HORVU.MOREX.r3.1HG0018300	HORVU.MOREX.r3.1HG0018300	--	9.51507	143	12.7397	187	8.72717	132	7.52579	106	9.12089	129	8.07664	123	8.5235	143	10.162	143	8.18245	136	7.2466	102	8.27746	120	8.50722	119	5.92889	92	6.87934	97	7.64703	105	11.1798	162	7.35641	104	8.92403	124	0.663061	-0.120879	normal	0.535504	0.162862	normal	0.613801	-0.14438	normal	0.462815	0.201658
HORVU.MOREX.r3.1HG0018310	HORVU.MOREX.r3.1HG0018310	--	3.44437	67	5.15636	97	4.0669	79	4.19178	75	3.95866	72	5.55494	108	3.72729	80	4.71983	85	2.31262	49	3.59853	65	3.92672	73	3.73414	67	4.59073	91	3.98277	72	3.16775	56	4.17504	77	7.27848	131	5.1547	91	0.372558	0.287078	normal	0.599595	0.195748	normal	0.877953	0.0644132	normal	0.180926	0.430472
HORVU.MOREX.r3.1HG0018320	HORVU.MOREX.r3.1HG0018320	--	0	0	0	0	0	0	0	0	0	0	0	0	0	0	0	0	0	0	0	0	0	0	0	0	0	0	0	0	0	0	0	0	0	0	0	0	--	--	--	--	--	--	--	--	--	--	--
HORVU.MOREX.r3.1HG0018330	HORVU.MOREX.r3.1HG0018330	--	0	0	0	0	0	0	0	0	0	0	0	0	0	0	0	0	0	0	0	0	0	0	0	0	0	0	0	0	0	0	0	0	0	0	0	0	--	--	--	--	--	--	--	--	--	--	--
HORVU.MOREX.r3.1HG0018340	HORVU.MOREX.r3.1HG0018340	--	0	0	0	0	0	0	0	0	0	0	0	0	0	0	0	0	0	0	0	0	0	0	0	0	0	0	0	0	0	0	0	0	0	0	0	0	--	--	--	--	--	--	--	--	--	--	--
HORVU.MOREX.r3.1HG0018350	HORVU.MOREX.r3.1HG0018350	--	0.577606	14	1.24322	29	0.843115	20	2.58458	56	2.2399	49	3.26602	76	0.620871	17	1.23957	27	0.10422	3	0.624826	14	0.609113	14	0.608997	14	0.140524	4	0.513688	12	0.992201	21	0.96812	22	0.745194	17	0.624216	14	6.44863e-05	1.55538	up	--	--	--	--	--	--	8.27897e-07	2.10525
HORVU.MOREX.r3.1HG0018360	HORVU.MOREX.r3.1HG0018360	--	0	0	0	0	0	0	0	0	0	0	0	0	0	0	0	0	0	0	0	0	0	0	0	0	0	0	0	0	0	0	0	0	0	0	0	0	--	--	--	--	--	--	--	--	--	--	--
HORVU.MOREX.r3.1HG0018390	HORVU.MOREX.r3.1HG0018390	LOC107825453	17.3126	402	15.4936	351	16.0141	372	14.4865	313	8.76309	191	10.2069	239	14.4494	374	11.1878	242	12.3771	317	16.8282	365	16.8929	375	15.9568	344	6.68408	159	6.54323	142	5.69046	121	3.71614	83	5.04285	110	4.82918	104	0.0881385	-0.341751	normal	0.0468769	0.318894	normal	0.0207076	0.36876	normal	0.0460844	-0.400495
HORVU.MOREX.r3.1HG0018400	HORVU.MOREX.r3.1HG0018400	--	0	0	0	0	0.109239	5	0	0	0.174005	7	0.344572	14	0	0	0	0	0	0	0.015099	1	0.051025	2	0	0	0	0	0	0	0	0	0	0	0	0	0	0	--	--	--	--	--	--	--	--	--	--	--
HORVU.MOREX.r3.1HG0018410	HORVU.MOREX.r3.1HG0018410	--	0.06054	2	0	0	0.201579	6	0.086691	3	0.064476	2	0.292941	8	0.017709	1	0	0	0.070785	2	0	0	0.04214	1	0.195596	5	0.078749	3	0.984823	23	0	0	0.429626	11	0	0	0.109005	3	--	--	--	--	--	--	--	--	--	--	--
HORVU.MOREX.r3.1HG0018420	HORVU.MOREX.r3.1HG0018420	--	0.052161	2	0.053438	2	0.078156	2	0.19831	4	0.055552	2	0.075305	2	0.219216	5	0	0	0	0	0.130842	3	0.054462	2	0	0	0	0	0	0	0	0	0	0	0.110866	2	0.055709	1	--	--	--	--	--	--	--	--	--	--	--
HORVU.MOREX.r3.1HG0018430	HORVU.MOREX.r3.1HG0018430	LOC111021800	18.5251	448	19.2462	455	20.0665	486	6.89865	156	8.49357	193	7.37057	180	22.5196	609	19.2025	433	21.6324	577	19.4053	439	25.1846	584	21.6224	486	14.195	352	13.8666	312	12.1804	269	9.62721	224	8.4486	191	8.58269	192	2.68604e-13	-1.12939	down	0.222259	-0.166867	normal	0.737776	0.0600432	normal	1.07071e-16	-1.36429
HORVU.MOREX.r3.1HG0018450	HORVU.MOREX.r3.1HG0018450	--	0	0	0	0	0	0	0	0	0	0	0	0	0	0	0	0	0	0	0	0	0	0	0	0	0	0	0	0	0	0	0	0	0	0	0	0	--	--	--	--	--	--	--	--	--	--	--
HORVU.MOREX.r3.1HG0018480	HORVU.MOREX.r3.1HG0018480	ycf2	0	0	0	0	0	0	0	0	0	0	0	0	0	0	0	0	0	0	0	0	0	0	0	0	0	0	0	0	0	0	0	0	0	0	0	0	--	--	--	--	--	--	--	--	--	--	--
HORVU.MOREX.r3.1HG0018490	HORVU.MOREX.r3.1HG0018490	--	0	0	0	0	0	0	0	0	0	0	0	0	0	0	0	0	0	0	0	0	0	0	0	0	0	0	0	0	0	0	0	0	0	0	0	0	--	--	--	--	--	--	--	--	--	--	--
HORVU.MOREX.r3.1HG0018500	HORVU.MOREX.r3.1HG0018500	--	0.52534	8	0.32474	5	0.771715	12	0.058331	1	0.191485	3	0.107906	2	0.635611	11	1.03422	14	1.21648	20	1.44092	20	0.891703	13	0.763431	11	0.851448	13	0.779388	11	1.27203	17	1.10265	16	1.53234	21	1.02675	14	--	--	--	--	--	--	--	--	--	--	--
HORVU.MOREX.r3.1HG0018510	HORVU.MOREX.r3.1HG0018510	--	17.4462	975	17.4881	954	18.7101	1046	9.10889	474	6.94694	365	7.36742	415	26.0823	1627	23.474	1222	22.2813	1372	24.6963	1290	24.6681	1320	22.6628	1175	32.0922	1837	29.2599	1521	33.2741	1697	31.2033	1673	31.2671	1632	33.7502	1735	8.68172e-16	-0.989357	normal	4.274e-07	-0.453896	normal	0.979506	0.00331038	normal	1.76177e-34	-1.44932
HORVU.MOREX.r3.1HG0018520	HORVU.MOREX.r3.1HG0018520	--	0	0	0	0	0	0	0.074916	1	0	0	0	0	0	0	0	0	0	0	0.163796	2	0	0	0	0	0	0	0	0	0	0	0	0	0	0	0	0	--	--	--	--	--	--	--	--	--	--	--
HORVU.MOREX.r3.1HG0018530	HORVU.MOREX.r3.1HG0018530	--	0	0	0	0	0	0	0	0	0	0	0	0	0	0	0	0	0	0	0	0	0	0	0	0	0	0	0	0	0	0	0	0	0	0	0	0	--	--	--	--	--	--	--	--	--	--	--
HORVU.MOREX.r3.1HG0018550	HORVU.MOREX.r3.1HG0018550	--	0	0	0	0	0	0	0	0	0	0	0	0	0	0	0	0	0	0	0	0	0	0	0	0	0	0	0	0	0	0	0	0	0	0	0	0	--	--	--	--	--	--	--	--	--	--	--
HORVU.MOREX.r3.1HG0018560	HORVU.MOREX.r3.1HG0018560	--	0	0	0	0	0	0	0	0	0	0	0	0	0	0	0	0	0	0	0	0	0	0	0	0	0	0	0	0	0	0	0	0	0	0	0	0	--	--	--	--	--	--	--	--	--	--	--
HORVU.MOREX.r3.1HG0018570	HORVU.MOREX.r3.1HG0018570	--	0	0	0	0	0	0	0	0	0	0	0	0	0	0	0	0	0	0	0	0	0	0	0	0	0	0	0	0	0	0	0	0	0	0	0	0	--	--	--	--	--	--	--	--	--	--	--
HORVU.MOREX.r3.1HG0018580	HORVU.MOREX.r3.1HG0018580	--	0.656495	11	0.675012	12	0.325297	6	0.28631	5	0.627771	10	0.697336	12	0.186543	4	0	0	0.268267	5	0	0	0.140424	3	0.189969	3	0.065799	2	0.259892	5	0.441378	7	0.131353	3	0.445752	7	0	0	--	--	--	--	--	--	--	--	--	--	--
HORVU.MOREX.r3.1HG0018590	HORVU.MOREX.r3.1HG0018590	--	2.20463	176	1.93613	151	1.88799	151	0.739047	55	0.616437	46	1.04366	84	1.53189	136	1.45887	108	1.35918	120	1.6656	124	1.33387	102	1.34754	100	10.8409	883	9.92722	734	9.84872	715	18.8666	1440	16.2749	1209	17.0822	1250	5.17976e-05	-1.07764	down	0.0621325	0.425167	normal	0.997409	0.000965017	normal	0.0324367	-0.674264
HORVU.MOREX.r3.1HG0018600	HORVU.MOREX.r3.1HG0018600	--	0	0	0	0	0	0	0	0	0	0	0	0	0	0	0	0	0	0	0	0	0	0	0	0	0	0	0	0	0	0	0	0	0	0	0	0	--	--	--	--	--	--	--	--	--	--	--
HORVU.MOREX.r3.1HG0018610	HORVU.MOREX.r3.1HG0018610	--	0	0	0	0	0	0	0.420383	6	0.165208	2	1.56405	21	0	0	0	0	0	0	0	0	0.019976	1	0.123067	2	0	0	0	0	0	0	0	0	0	0	0	0	--	--	--	--	--	--	--	--	--	--	--
HORVU.MOREX.r3.1HG0018620	HORVU.MOREX.r3.1HG0018620	--	3.08126	107	4.16529	140	2.71976	94	3.43985	111	4.46691	145	6.32389	220	5.30979	205	3.78253	122	4.49749	171	9.76523	315	12.0208	397	10.1422	325	3.5886	127	4.31049	139	4.50858	142	5.7471	190	4.82999	156	6.45364	205	0.0125045	0.676605	normal	0.0655936	-0.468183	normal	1.32849e-11	1.16026	up	3.55795e-06	-0.986685
HORVU.MOREX.r3.1HG0018630	HORVU.MOREX.r3.1HG0018630	--	0	0	0	0	0	0	0	0	0	0	0	0	0	0	0	0	0	0	0	0	0	0	0	0	0	0	0	0	0	0	0	0	0	0	0	0	--	--	--	--	--	--	--	--	--	--	--
HORVU.MOREX.r3.1HG0018640	HORVU.MOREX.r3.1HG0018640	--	0	0	0	0	0	0	0	0	0	0	0	0	0	0	0	0	0	0	0	0	0	0	0	0	0	0	0	0	0	0	0	0	0	0	0	0	--	--	--	--	--	--	--	--	--	--	--
HORVU.MOREX.r3.1HG0018650	HORVU.MOREX.r3.1HG0018650	--	1.66264	24	2.0909	30	2.06539	30	0	0	0	0	0	0	1.24942	20	1.66565	23	3.44089	55	0	0	0	0	0	0	1.90891	28	2.7671	37	2.13134	28	0	0	0	0	0	0	--	--	--	--	--	--	--	--	--	--	--
HORVU.MOREX.r3.1HG0018660	HORVU.MOREX.r3.1HG0018660	--	0.378976	7	0.864446	14	0.475817	8	0	0	0	0	0	0	1.33005	24	0.544733	9	1.21809	22	0	0	0	0	0	0	1.48502	25	1.68775	26	1.76129	26	0	0	0	0	0	0	--	--	--	--	--	--	--	--	--	--	--
HORVU.MOREX.r3.1HG0018670	HORVU.MOREX.r3.1HG0018670	--	1.38791	22	2.61769	41	1.48539	24	0	0	0	0	0	0	1.82097	32	2.14296	32	2.70354	47	0	0	0	0	0	0	2.71618	44	2.02549	30	3.06425	44	0	0	0	0	0	0	--	--	--	--	--	--	--	--	--	--	--
HORVU.MOREX.r3.1HG0018680	HORVU.MOREX.r3.1HG0018680	--	0.766541	10	1.27431	16	2.05249	26	0	0	0	0	0	0	2.33077	33	1.28717	15	2.09103	29	0	0	0	0	0	0	2.57308	33	3.1111	36	4.6018	52	0	0	0	0	0	0	--	--	--	--	--	--	--	--	--	--	--
HORVU.MOREX.r3.1HG0018690	HORVU.MOREX.r3.1HG0018690	--	0.530559	14	0.376935	10	0.417839	11	0	0	0	0	0	0	0.387763	12	0.491318	12	0.33668	10	0	0	0	0	0	0	0.471595	13	0.633223	16	0.197307	5	0	0	0	0	0	0	--	--	--	--	--	--	--	--	--	--	--
HORVU.MOREX.r3.1HG0018700	HORVU.MOREX.r3.1HG0018700	--	0	0	0	0	0	0	0	0	0	0	0	0	0	0	0	0	0	0	0	0	0	0	0	0	0	0	0	0	0	0	0	0	0	0	0	0	--	--	--	--	--	--	--	--	--	--	--
HORVU.MOREX.r3.1HG0018710	HORVU.MOREX.r3.1HG0018710	--	0	0	0	0	0	0	0	0	0	0	0	0	0	0	0	0	0	0	0	0	0	0	0	0	0	0	0	0	0	0	0	0	0	0	0	0	--	--	--	--	--	--	--	--	--	--	--
HORVU.MOREX.r3.1HG0018720	HORVU.MOREX.r3.1HG0018720	--	0	0	0	0	0	0	0	0	0	0	0	0	0	0	0	0	0	0	0	0	0	0	0	0	0	0	0	0	0	0	0	0	0	0	0	0	--	--	--	--	--	--	--	--	--	--	--
HORVU.MOREX.r3.1HG0018730	HORVU.MOREX.r3.1HG0018730	LOC109774414	98.2167	3840	90.894	3469	88.485	3463	97.2806	3541	100.422	3686	92.4607	3639	77.0584	3364	76.8101	2798	73.3324	3160	71.7032	2623	74.389	2786	72.8365	2644	62.8936	2521	63.0764	2295	65.6931	2346	68.3494	2566	67.4608	2465	67.8977	2444	0.000391324	0.256741	normal	3.23207e-05	0.253127	normal	0.458112	-0.0529534	normal	3.32774e-17	0.56819
HORVU.MOREX.r3.1HG0018740	HORVU.MOREX.r3.1HG0018740	--	9.62846	587	10.4779	623	8.08796	493	9.59283	544	7.29779	418	11.3198	694	7.85277	534	9.17577	521	7.71799	518	8.48489	484	10.2186	596	9.71667	550	9.90692	619	9.66743	548	10.8506	604	12.9568	758	11.3204	645	10.7256	602	0.269656	0.192616	normal	0.301065	0.151585	normal	0.175268	0.196486	normal	0.392104	0.149891
HORVU.MOREX.r3.1HG0018760	HORVU.MOREX.r3.1HG0018760	--	0	0	0	0	0	0	0	0	0	0	0	0	0	0	0	0	0	0	0	0	0	0	0	0	0	0	0	0	0	0	0	0	0	0	0	0	--	--	--	--	--	--	--	--	--	--	--
HORVU.MOREX.r3.1HG0018770	HORVU.MOREX.r3.1HG0018770	--	0	0	0	0	0	0	0	0	0	0	0	0	0	0	0	0	0	0	0	0	0	0	0	0	0	0	0	0	0	0	0	0	0	0	0	0	--	--	--	--	--	--	--	--	--	--	--
HORVU.MOREX.r3.1HG0018780	HORVU.MOREX.r3.1HG0018780	--	0	0	0	0	0	0	0	0	0	0	0	0	0	0	0	0	0	0	0	0	0	0	0	0	0	0	0	0	0	0	0	0	0	0	0	0	--	--	--	--	--	--	--	--	--	--	--
HORVU.MOREX.r3.1HG0018790	HORVU.MOREX.r3.1HG0018790	--	0	0	0	0	0	0	0	0	0	0	0	0	0	0	0	0	0	0	0	0	0	0	0	0	0	0	0	0	0	0	0	0	0	0	0	0	--	--	--	--	--	--	--	--	--	--	--
HORVU.MOREX.r3.1HG0018800	HORVU.MOREX.r3.1HG0018800	--	8.92375	453	10.0275	497	9.3112	474	105.928	5006	102.843	4901	88.768	4536	1.97794	113	1.62562	77	1.50997	85	2.16581	103	2.61203	127	1.94693	92	2.59938	136	2.02318	96	2.14776	100	2.05797	101	1.551	74	1.59569	75	0	3.56879	up	3.949e-45	2.37182	up	0.22554	0.346363	normal	0	5.60236
HORVU.MOREX.r3.1HG0018810	HORVU.MOREX.r3.1HG0018810	--	11.9611	930	11.5116	874	11.4039	887	9.58262	694	11.3768	830	11.1417	872	7.86212	683	6.94516	503	7.4858	642	7.64685	556	8.12799	605	8.74458	631	7.61009	607	7.52258	544	6.57062	467	9.01409	673	8.53903	621	7.96556	570	0.551123	0.073449	normal	1.88346e-09	0.603982	normal	0.33396	0.131726	normal	2.28737e-06	0.549316
HORVU.MOREX.r3.1HG0018820	HORVU.MOREX.r3.1HG0018820	--	0	0	0.086326	4	0.151453	8	0	0	0.06423	3	0.120798	6	0	0	0	0	0	0	0	0	0.036487	2	0	0	0	0	0	0	0	0	0	0	0	0	0	0	--	--	--	--	--	--	--	--	--	--	--
HORVU.MOREX.r3.1HG0018830	HORVU.MOREX.r3.1HG0018830	--	0	0	0.036021	2	0	0	0	0	0.037572	3	0	0	0.015795	1	0	0	0	0	0	0	0	0	0	0	0	0	0	0	0	0	0	0	0	0	0	0	--	--	--	--	--	--	--	--	--	--	--
HORVU.MOREX.r3.1HG0018840	HORVU.MOREX.r3.1HG0018840	--	0	0	0	0	0	0	0	0	0	0	0	0	0	0	0	0	0	0	0	0	0	0	0	0	0	0	0	0	0	0	0	0	0	0	0	0	--	--	--	--	--	--	--	--	--	--	--
HORVU.MOREX.r3.1HG0018850	HORVU.MOREX.r3.1HG0018850	--	0	0	0	0	0	0	0	0	0	0	0	0	0	0	0	0	0	0	0	0	0	0	0	0	0	0	0	0	0	0	0	0	0	0	0	0	--	--	--	--	--	--	--	--	--	--	--
HORVU.MOREX.r3.1HG0018870	HORVU.MOREX.r3.1HG0018870	--	0	0	0	0	0	0	0	0	0	0	0	0	0	0	0	0	0	0	0	0	0	0	0	0	0	0	0	0	0	0	0	0	0	0	0	0	--	--	--	--	--	--	--	--	--	--	--
HORVU.MOREX.r3.1HG0018880	HORVU.MOREX.r3.1HG0018880	--	0	0	0	0	0	0	0	0	0	0	0	0	0	0	0	0	0	0	0	0	0	0	0	0	0	0	0	0	0	0	0	0	0	0	0	0	--	--	--	--	--	--	--	--	--	--	--
HORVU.MOREX.r3.1HG0018900	HORVU.MOREX.r3.1HG0018900	--	0	0	0	0	0	0	0	0	0	0	0	0	0	0	0	0	0	0	0	0	0	0	0	0	0	0	0	0	0	0	0	0	0	0	0	0	--	--	--	--	--	--	--	--	--	--	--
HORVU.MOREX.r3.1HG0018910	HORVU.MOREX.r3.1HG0018910	--	0	0	0	0	0	0	0	0	0	0	0	0	0	0	0	0	0	0	0	0	0	0	0	0	0	0	0	0	0	0	0	0	0	0	0	0	--	--	--	--	--	--	--	--	--	--	--
HORVU.MOREX.r3.1HG0018930	HORVU.MOREX.r3.1HG0018930	LOC109774421	2.45486	161	3.57388	229	2.2135	145	2.70993	166	2.62087	161	2.89659	191	2.48055	182	1.89452	116	1.89535	137	2.28095	140	1.4523	91	1.92415	117	1.38373	93	1.48827	91	1.31627	79	1.19946	76	1.85455	114	1.26018	76	0.45553	0.187119	normal	0.181933	0.339747	normal	0.658061	-0.137714	normal	0.00383776	0.693251
HORVU.MOREX.r3.1HG0018940	HORVU.MOREX.r3.1HG0018940	LOC109774409	16.0824	602	17.1649	627	13.578	509	24.7736	863	24.6496	866	24.6542	929	11.1179	465	7.76956	271	7.97749	329	7.53187	264	7.14692	257	7.49972	261	5.10127	196	6.34226	221	6.58974	226	5.45671	196	6.1996	217	7.39393	255	2.96664e-14	0.848341	normal	1.32466e-06	0.750695	normal	0.177627	-0.262281	normal	2.08307e-60	1.89171
HORVU.MOREX.r3.1HG0018950	HORVU.MOREX.r3.1HG0018950	--	0.328369	11	0.543515	17	0.788664	25	0.890983	27	0.670126	20	1.0245	33	1.26817	45	1.38801	41	0.830908	29	0.588742	18	0.10634	4	0.619957	19	0.750399	25	0.679721	20	0.773867	23	0.654259	20	0	0	0.451941	14	--	--	--	--	--	--	--	--	--	--	--
HORVU.MOREX.r3.1HG0018970	HORVU.MOREX.r3.1HG0018970	--	0	0	0	0	0	0	0	0	0	0	0	0	0	0	0	0	0	0	0	0	0	0	0	0	0	0	0	0	0	0	0	0	0	0	0	0	--	--	--	--	--	--	--	--	--	--	--
HORVU.MOREX.r3.1HG0018980	HORVU.MOREX.r3.1HG0018980	--	0	0	0	0	0	0	0	0	0	0	0	0	0	0	0	0	0	0	0	0	0	0	0	0	0	0	0	0	0	0	0	0	0	0	0	0	--	--	--	--	--	--	--	--	--	--	--
HORVU.MOREX.r3.1HG0018990	HORVU.MOREX.r3.1HG0018990	--	0	0	0	0	0	0	0	0	0	0	0	0	0	0	0	0	0	0	0	0	0	0	0	0	0	0	0	0	0	0	0	0	0	0	0	0	--	--	--	--	--	--	--	--	--	--	--
HORVU.MOREX.r3.1HG0019010	HORVU.MOREX.r3.1HG0019010	--	0	0	0	0	0	0	0	0	0	0	0	0	0	0	0	0	0	0	0	0	0	0	0	0	0	0	0	0	0	0	0	0	0	0	0	0	--	--	--	--	--	--	--	--	--	--	--
HORVU.MOREX.r3.1HG0019020	HORVU.MOREX.r3.1HG0019020	--	0	0	0	0	0	0	0	0	0	0	0	0	0	0	0	0	0	0	0	0	0	0	0	0	0	0	0	0	0	0	0	0	0	0	0	0	--	--	--	--	--	--	--	--	--	--	--
HORVU.MOREX.r3.1HG0019030	HORVU.MOREX.r3.1HG0019030	--	0	0	0	0	0	0	0	0	0	0	0	0	0	0	0	0	0	0	0	0	0	0	0	0	0	0	0	0	0	0	0	0	0	0	0	0	--	--	--	--	--	--	--	--	--	--	--
HORVU.MOREX.r3.1HG0019040	HORVU.MOREX.r3.1HG0019040	--	0	0	0	0	0	0	0	0	0	0	0	0	0	0	0	0	0	0	0	0	0	0	0	0	0	0	0	0	0	0	0	0	0	0	0	0	--	--	--	--	--	--	--	--	--	--	--
HORVU.MOREX.r3.1HG0019050	HORVU.MOREX.r3.1HG0019050	--	0	0	0	0	0	0	0	0	0	0	0	0	0	0	0	0	0	0	0	0	0	0	0	0	0	0	0	0	0	0	0	0	0	0	0	0	--	--	--	--	--	--	--	--	--	--	--
HORVU.MOREX.r3.1HG0019060	HORVU.MOREX.r3.1HG0019060	--	16.6431	1902	17.2945	1929	19.1576	2192	22.056	2347	20.6738	2218	23.0368	2650	18.3592	2343	16.7085	1779	17.2944	2178	18.4482	1972	16.5979	1817	18.0074	1911	16.4959	1932	16.0329	1705	16.2609	1697	17.8291	1956	18.3439	1959	18.2663	1922	1.09761e-09	0.499971	normal	0.8733	-0.0151775	normal	0.860759	0.0182958	normal	1.16623e-09	0.471598
HORVU.MOREX.r3.1HG0019070	HORVU.MOREX.r3.1HG0019070	--	0	0	0	0	0	0	0	0	0	0	0	0	0	0	0	0	0	0	0	0	0	0	0	0	0	0	0	0	0	0	0	0	0	0	0	0	--	--	--	--	--	--	--	--	--	--	--
HORVU.MOREX.r3.1HG0019090	HORVU.MOREX.r3.1HG0019090	--	2.52025	27	2.96363	31	1.82177	20	1.75215	18	1.65533	17	2.65309	29	4.29715	51	3.90943	39	5.8052	68	2.47894	25	1.98942	21	2.72713	27	4.05959	44	3.41597	34	3.46699	34	2.04981	21	3.24519	32	3.14885	31	--	--	--	0.0353355	-0.854323	normal	0.0500696	-0.71739	normal	--	--
HORVU.MOREX.r3.1HG0019100	HORVU.MOREX.r3.1HG0019100	--	27.0752	993	29.7172	1064	27.7439	1019	34.6557	1184	36.5002	1257	34.8974	1288	41.0846	1683	42.8356	1464	40.4653	1636	37.1487	1275	31.767	1116	30.8298	1050	68.8055	2586	70.768	2415	68.3464	2289	58.8883	2073	61.9535	2123	65.8589	2224	5.30592e-09	0.518278	normal	6.14577e-14	-0.590074	normal	0.000629071	-0.313634	normal	0.0148238	0.250139
HORVU.MOREX.r3.1HG0019130	HORVU.MOREX.r3.1HG0019130	--	0	0	0	0	0	0	0	0	0	0	0	0	0	0	0	0	0	0	0	0	0	0	0	0	0	0	0	0	0	0	0	0	0	0	0	0	--	--	--	--	--	--	--	--	--	--	--
HORVU.MOREX.r3.1HG0019140	HORVU.MOREX.r3.1HG0019140	--	1.66734	19	1.82997	21	3.85327	44	3.83239	41	5.77115	62	5.76014	66	8.0498	102	10.9565	116	12.5244	157	10.9063	116	15.6237	170	10.0954	107	3.99822	47	4.66918	50	6.68936	70	0.9321	11	1.38826	15	1.05702	12	0.00701622	1.09774	up	1.16767e-08	-1.93392	down	0.53089	0.194843	normal	0.000540646	-1.05545
HORVU.MOREX.r3.1HG0019150	HORVU.MOREX.r3.1HG0019150	--	3.50817	84	1.76959	42	2.43266	59	3.06002	69	2.88605	65	1.15822	28	1.47186	40	1.60831	36	1.74447	46	3.09003	70	4.1341	95	2.84335	64	1.02246	26	0.709598	16	0.41083	9	0	0	0	0	0	0	0.896072	0.0638311	normal	0.128077	0.58442	normal	0.00377776	0.884969	normal	0.44768	-0.327147
HORVU.MOREX.r3.1HG0019160	HORVU.MOREX.r3.1HG0019160	--	0.782532	14	0.448009	8	0.553832	10	0.341796	6	0.672143	11	0.456225	8	0.899105	18	1.37706	23	0.63124	13	0.345132	6	0.650503	11	1.31703	22	1.00963	18	0.676961	11	0.723569	12	2.41268	41	0.671904	11	0.596747	10	--	--	--	--	--	--	--	--	--	--	--
HORVU.MOREX.r3.1HG0019170	HORVU.MOREX.r3.1HG0019170	--	6.57618	741	6.28137	691	7.02289	792	2.89411	304	3.64291	386	4.80539	545	4.67105	588	4.41216	463	4.27802	531	4.17715	440	4.21485	455	5.35776	560	3.26668	377	3.05775	321	2.93293	302	2.66915	289	2.98466	315	3.55931	369	0.000142616	-0.604574	normal	1.42458e-06	0.534011	normal	0.834834	0.0388283	normal	0.579719	-0.113246
HORVU.MOREX.r3.1HG0019180	HORVU.MOREX.r3.1HG0019180	--	0	0	0.582974	11	0.374392	7	0	0	0	0	0	0	1.18789	25	0.498971	9	1.47902	31	0	0	0	0	0	0	1.0748	21	0.537928	10	1.68271	29	0	0	0	0	0.083765	2	--	--	--	--	--	--	--	--	--	--	--
HORVU.MOREX.r3.1HG0019190	HORVU.MOREX.r3.1HG0019190	--	0	0	0	0	0.208823	3	0	0	0	0	0	0	0	0	0.393402	6	1.58037	25	0	0	0	0	0	0	0.377983	6	0	0	0	0	0	0	0	0	0	0	--	--	--	--	--	--	--	--	--	--	--
HORVU.MOREX.r3.1HG0019200	HORVU.MOREX.r3.1HG0019200	--	2.32856	19	2.8208	22	2.11167	17	1.86868	14	1.47494	11	0.452009	4	8.02796	70	11.2077	81	7.70527	66	9.12168	67	9.06017	68	7.45364	54	9.30038	74	7.02723	51	7.70329	55	10.4555	78	10.1687	74	8.83314	63	--	--	--	6.01681e-06	-1.67998	down	0.906123	-0.0480301	normal	8.7626e-07	-2.36079
HORVU.MOREX.r3.1HG0019210	HORVU.MOREX.r3.1HG0019210	--	0.063961	1	0.062966	1	0	0	0.497485	7	1.73917	22	0.254147	4	0.813472	13	2.18496	28	0.645504	10	0.713075	9	1.34452	18	1.185	15	2.18885	30	0.576181	8	0.392327	5	1.84714	24	1.07081	14	1.51042	19	--	--	--	--	--	--	--	--	--	--	--
HORVU.MOREX.r3.1HG0019220	HORVU.MOREX.r3.1HG0019220	--	1.09837	24	0.451947	10	0.308811	7	0	0	0	0	0	0	0.686357	17	1.40809	29	0.635173	15	1.25461	26	2.19514	46	2.44021	49	2.2819	51	1.16159	24	2.94889	58	4.07608	84	5.24864	106	5.37846	107	--	--	--	--	--	--	--	--	--	--	--
HORVU.MOREX.r3.1HG0019230	HORVU.MOREX.r3.1HG0019230	--	10.2348	256	14.3056	349	15.1373	379	18.9904	442	21.6949	509	14.1355	356	27.0185	754	32.8828	765	32.3165	890	36.2098	846	46.0729	1102	32.81	761	16.2259	416	17.2434	401	20.287	463	27.676	664	34.5642	807	30	690	0.000627093	0.644422	normal	2.39711e-17	-1.2318	down	0.0233278	0.311108	normal	3.40654e-08	-0.898621
HORVU.MOREX.r3.1HG0019240	HORVU.MOREX.r3.1HG0019240	--	9.86748	387	8.6927	332	9.9343	390	12.7191	464	14.5874	536	11.1687	440	12.0221	526	10.3827	379	8.80244	380	8.01325	294	6.76443	254	7.60483	277	9.49863	381	12.5033	456	11.9411	427	9.09398	342	9.3943	344	8.654	312	3.08106e-05	0.615378	normal	0.33789	-0.162551	normal	0.00523977	-0.457875	normal	1.672e-09	0.935396
HORVU.MOREX.r3.1HG0019260	HORVU.MOREX.r3.1HG0019260	--	211.653	18653	206.172	17697	219.107	19301	530.206	43494	506.629	41927	574.942	50995	171.473	16860	169.884	13942	175.729	17053	125.96	10330	134.93	11294	135.495	11069	113.605	10153	116.449	9454	105.187	8440	58.4279	4910	63.2353	5119	65.673	5161	3.51733e-155	1.53066	up	5.17215e-10	0.264492	normal	6.06685e-22	-0.389045	normal	0	2.19077
HORVU.MOREX.r3.1HG0019270	HORVU.MOREX.r3.1HG0019270	--	20.0458	938	21.4093	978	20.1621	945	22.9953	1002	21.3692	939	21.1403	996	20.94	1095	19.1314	835	20.445	1055	34.3868	1506	32.9748	1478	32.1909	1399	19.0157	912	17.7491	773	20.3553	870	18.2009	818	17.2483	755	16.4575	709	0.00467174	0.280543	normal	0.919503	-0.0113552	normal	4.54878e-19	0.708399	normal	1.18797e-06	-0.440258
HORVU.MOREX.r3.1HG0019280	HORVU.MOREX.r3.1HG0019280	--	0.126751	2	0.093516	2	0.100561	2	0.136128	2	0.093883	2	0.06166	1	0.154136	3	0	0	0	0	0.409811	5	0.288104	4	0.065163	1	0	0	0	0	0	0	0	0	0.036831	1	0	0	--	--	--	--	--	--	--	--	--	--	--
HORVU.MOREX.r3.1HG0019320	HORVU.MOREX.r3.1HG0019320	--	4.01102	188	3.46209	159	4.41465	207	5.15927	225	5.0686	223	5.28534	250	1.57727	83	1.64342	72	1.52653	79	1.47391	65	1.81384	82	1.93437	85	0.862259	42	1.52352	67	0.551106	24	1.41528	64	1.40269	62	1.98409	86	0.00277213	0.563047	normal	4.94814e-08	1.24031	up	0.723612	0.125461	normal	2.41859e-15	1.69845
HORVU.MOREX.r3.1HG0019330	HORVU.MOREX.r3.1HG0019330	--	14.5438	846	10.11	574	11.4843	669	31.442	1703	35.3513	1931	31.9205	1869	5.71978	372	6.20872	337	5.78831	372	6.95924	379	11.768	656	12.4523	673	1.98015	119	2.17525	118	2.48685	133	2.07683	116	2.03303	111	2.06979	111	4.6573e-45	1.62627	up	6.76573e-12	0.978056	normal	9.56294e-06	0.770834	normal	7.22078e-12	1.78612
HORVU.MOREX.r3.1HG0019340	HORVU.MOREX.r3.1HG0019340	LOC109746720	11.7413	864	11.44	821	10.7824	794	8.37616	574	8.41911	582	8.22869	609	17.2508	1417	17.1247	1173	15.9049	1289	11.9253	821	11.9646	843	12.8635	879	20.1402	1518	20.5898	1409	20.167	1354	14.1021	996	14.6048	1004	13.625	923	0.0291764	-0.244367	normal	5.00888e-12	-0.59779	normal	2.426e-07	-0.445492	normal	0.00031155	-0.390537
HORVU.MOREX.r3.1HG0019350	HORVU.MOREX.r3.1HG0019350	--	0.039827	4	0	0	0	0	0.077972	8	0	0	0.020606	2	0.037149	4	0.022189	2	0	0	0.022099	2	0	0	0	0	1.85995	184	1.67435	151	1.90626	168	3.7206	345	3.8909	351	4.25546	378	--	--	--	--	--	--	--	--	--	--	--
HORVU.MOREX.r3.1HG0019360	HORVU.MOREX.r3.1HG0019360	--	22.2453	1999	24.6195	2159	22.3748	2013	17.7538	1486	17.3693	1466	18.6136	1684	27.1295	2722	25.2068	2110	26.1517	2590	27.1079	2279	25.7318	2215	25.491	2127	32.8423	3025	32.6394	2729	30.4333	2497	36.7783	3173	40.8404	3430	36.9027	3053	0.0442879	-0.170105	normal	0.0017597	-0.216476	normal	0.974804	-0.0030148	normal	5.92727e-07	-0.38021
HORVU.MOREX.r3.1HG0019370	HORVU.MOREX.r3.1HG0019370	--	0.114844	4	0	0	0	0	0	0	0	0	0	0	0	0	0	0	0	0	0	0	0.076742	2	0	0	0.009212	1	0	0	0.005589	1	0	0	0.001613	1	0	0	--	--	--	--	--	--	--	--	--	--	--
HORVU.MOREX.r3.1HG0019380	HORVU.MOREX.r3.1HG0019380	LOC109784933	40.9584	2554	37.7037	2295	38.0189	2373	27.9788	1624	25.1377	1472	26.7655	1680	34.2642	2386	33.3392	1937	31.2148	2145	31.8073	1855	34.7715	2076	30.6579	1775	27.1115	1733	25.35	1471	23.8556	1358	26.8108	1605	28.2195	1645	26.6818	1532	1.61299e-05	-0.351238	normal	0.00384289	0.203966	normal	0.82381	-0.0230653	normal	0.200016	-0.120636
HORVU.MOREX.r3.1HG0019390	HORVU.MOREX.r3.1HG0019390	--	2.39263	21	1.45083	13	1.03166	9	0.622661	5	1.1616	10	1.14641	10	1.63595	16	0.591192	5	0.760172	8	0.961801	8	0.263869	3	0.526641	5	0.715224	7	0.227016	2	0.634007	5	0	0	0.271213	3	0.008498	1	--	--	--	--	--	--	--	--	--	--	--
HORVU.MOREX.r3.1HG0019400	HORVU.MOREX.r3.1HG0019400	--	0	0	0	0	0	0	0	0	0	0	0	0	0	0	0	0	0	0	0	0	0	0	0	0	0	0	0	0	0	0	0	0	0	0	0	0	--	--	--	--	--	--	--	--	--	--	--
HORVU.MOREX.r3.1HG0019410	HORVU.MOREX.r3.1HG0019410	--	16.1413	1116	18.4538	1245	16.0026	1107	13.2585	854	12.6578	822	14.1759	987	16.6427	1285	18.5024	1192	17.7107	1350	15.7104	1016	15.8066	1047	15.0645	967	16.7668	1188	17.6104	1133	17.4506	1102	15.7726	1047	20.4289	1320	18.2014	1158	0.205542	-0.139088	normal	0.322205	-0.098759	normal	0.0560378	-0.179654	normal	0.639661	-0.0532418
HORVU.MOREX.r3.1HG0019420	HORVU.MOREX.r3.1HG0019420	--	12.3434	1032	12.856	1049	13.0116	1089	11.1572	869	10.1947	800	10.0177	843	11.8387	1105	11.2025	873	11.1166	1024	12.155	951	12.847	1029	13.5872	1055	8.74091	749	7.34011	571	8.76281	669	9.62298	773	8.84162	691	8.80123	678	0.423466	-0.0900202	normal	0.187208	0.125498	normal	0.0792215	0.173566	normal	0.227829	-0.13579
HORVU.MOREX.r3.1HG0019430	HORVU.MOREX.r3.1HG0019430	--	0	0	0	0	0	0	0	0	0	0	0	0	0	0	0	0	0	0	0	0	0	0	0	0	0	0	0	0	0	0	0	0	0	0	0	0	--	--	--	--	--	--	--	--	--	--	--
HORVU.MOREX.r3.1HG0019440	HORVU.MOREX.r3.1HG0019440	--	0	0	0	0	0	0	0	0	0	0	0	0	0	0	0	0	0	0	0	0	0	0	0	0	0	0	0	0	0	0	0	0	0	0	0	0	--	--	--	--	--	--	--	--	--	--	--
HORVU.MOREX.r3.1HG0019490	HORVU.MOREX.r3.1HG0019490	LOC109736874	0	0	0	0	0	0	0	0	0	0	0	0	0	0	0	0	0	0	0	0	0	0	0	0	0	0	0	0	0	0	0	0	0	0	0	0	--	--	--	--	--	--	--	--	--	--	--
HORVU.MOREX.r3.1HG0019510	HORVU.MOREX.r3.1HG0019510	--	0	0	0	0	0	0	0	0	0	0	0	0	0	0	0	0	0	0	0	0	0	0	0	0	0	0	0	0	0	0	0	0	0	0	0	0	--	--	--	--	--	--	--	--	--	--	--
HORVU.MOREX.r3.1HG0019520	HORVU.MOREX.r3.1HG0019520	--	0	0	0	0	0	0	0	0	0	0	0	0	0	0	0	0	0	0	0	0	0	0	0	0	0	0	0	0	0	0	0	0	0	0	0	0	--	--	--	--	--	--	--	--	--	--	--
HORVU.MOREX.r3.1HG0019530	HORVU.MOREX.r3.1HG0019530	--	0	0	0	0	0	0	0	0	0	0	0	0	0	0	0	0	0	0	0	0	0	0	0	0	0	0	0	0	0	0	0	0	0	0	0	0	--	--	--	--	--	--	--	--	--	--	--
HORVU.MOREX.r3.1HG0019550	HORVU.MOREX.r3.1HG0019550	--	6.64572	219	4.84418	156	5.51425	182	0	0	0	0	0	0	11.8643	436	11.6335	357	8.38494	304	0	0	0	0	0	0	2.20524	75	4.09401	126	3.65995	110	0	0	0	0	0	0	2.86161e-34	-5.87787	down	1.21582e-06	-0.91475	normal	2.4219e-72	-5.60072	down	--	--
HORVU.MOREX.r3.1HG0019570	HORVU.MOREX.r3.1HG0019570	--	0.766133	12	0.892151	14	0.460986	8	2.17642	32	0.940308	14	2.23137	35	0.886679	16	0.956402	14	1.60149	28	1.02114	15	2.02322	30	0.981939	15	1.63232	26	1.08863	16	1.52924	22	2.98682	45	0.675825	10	1.2243	18	--	--	--	--	--	--	--	--	--	--	--
HORVU.MOREX.r3.1HG0019580	HORVU.MOREX.r3.1HG0019580	--	4.7132	403	4.29773	359	4.324	370	3.13992	250	4.1067	330	4.54883	392	3.2046	306	3.2753	261	2.66311	251	3.4245	274	3.0621	251	3.72413	296	3.0092	264	2.2187	177	2.37785	186	3.80441	313	4.05395	324	3.65448	288	0.935212	0.017328	normal	0.00118085	0.502718	normal	0.449884	0.153924	normal	0.0491433	0.366943
HORVU.MOREX.r3.1HG0019600	HORVU.MOREX.r3.1HG0019600	--	0	0	0	0	0	0	0	0	0	0	0	0	0	0	0	0	0	0	0	0	0	0	0	0	0	0	0	0	0	0	0	0	0	0	0	0	--	--	--	--	--	--	--	--	--	--	--
HORVU.MOREX.r3.1HG0019650	HORVU.MOREX.r3.1HG0019650	--	4.303	274	4.0746	253	4.2832	273	2.64775	157	1.9922	119	2.40951	155	5.97836	425	7.14819	424	6.04928	424	7.55627	450	8.0356	489	6.15322	363	10.758	701	10.6132	628	10.5915	615	7.68945	470	9.25046	550	8.56611	502	0.00113186	-0.632451	normal	2.7358e-05	-0.622741	normal	0.307343	0.175771	normal	1.19218e-15	-1.44435
HORVU.MOREX.r3.1HG0019660	HORVU.MOREX.r3.1HG0019660	--	2.34357	258	1.93381	208	2.47155	273	0.744088	77	0.1652	18	0.522593	58	1.06478	131	1.06506	110	1.00842	123	2.03484	210	1.69489	179	1.72345	177	0.913049	103	1.1992	123	1.28151	129	1.16229	123	1.01011	104	1.01571	103	0.000705215	-1.64019	down	1.46146e-07	1.03749	up	0.000271757	0.740147	normal	1.11387e-06	-1.6874
HORVU.MOREX.r3.1HG0019680	HORVU.MOREX.r3.1HG0019680	--	10.672	1288	10.1142	1191	11.809	1426	9.55662	1074	8.63973	979	9.16568	1113	3.79431	512	4.02742	453	3.9742	529	7.01922	792	7.58972	877	6.92508	776	3.90541	483	4.46603	502	4.06724	448	4.2192	489	4.77634	539	4.42627	492	0.616341	-0.0583847	normal	1.14236e-46	1.42055	up	8.39368e-17	0.851041	normal	3.84517e-07	0.506853
HORVU.MOREX.r3.1HG0019690	HORVU.MOREX.r3.1HG0019690	--	0	0	0	0	0	0	0	0	0	0	0	0	0	0	0	0	0	0	0	0	0	0	0	0	0	0	0	0	0	0	0	0	0	0	0	0	--	--	--	--	--	--	--	--	--	--	--
HORVU.MOREX.r3.1HG0019710	HORVU.MOREX.r3.1HG0019710	--	0	0	0	0	0	0	0	0	0	0	0	0	0	0	0	0	0	0	0	0	0	0	0	0	0	0	0	0	0	0	0	0	0	0	0	0	--	--	--	--	--	--	--	--	--	--	--
HORVU.MOREX.r3.1HG0019720	HORVU.MOREX.r3.1HG0019720	--	0	0	0	0	0	0	0	0	0	0	0	0	0	0	0	0	0	0	0	0	0	0	0	0	0	0	0	0	0	0	0	0	0	0	0	0	--	--	--	--	--	--	--	--	--	--	--
HORVU.MOREX.r3.1HG0019730	HORVU.MOREX.r3.1HG0019730	--	19.8209	2732	21.5968	2905	21.5787	2977	20.211	2593	20.3704	2636	21.1753	2938	20.348	3132	19.6084	2518	20.308	3085	22.8588	2947	22.9966	3035	24.2225	3100	21.5144	3039	21.466	2753	21.5756	2715	23.3333	3087	24.0424	3097	24.2303	3074	0.0253287	0.164726	normal	0.707024	0.0279076	normal	0.000226309	0.21565	normal	0.807047	-0.0197206
HORVU.MOREX.r3.1HG0019740	HORVU.MOREX.r3.1HG0019740	--	0	0	0	0	0	0	0	0	0	0	0	0	0	0	0	0	0	0	0	0	0	0	0	0	0	0	0	0	0	0	0	0	0	0	0	0	--	--	--	--	--	--	--	--	--	--	--
HORVU.MOREX.r3.1HG0019780	HORVU.MOREX.r3.1HG0019780	--	0	0	0	0	0	0	0	0	0.371918	5	0.080549	1	0	0	0	0	0	0	0	0	0	0	0.083834	1	0.189857	3	0	0	0.190213	3	0	0	0.384021	5	0.078089	1	--	--	--	--	--	--	--	--	--	--	--
HORVU.MOREX.r3.1HG0019810	HORVU.MOREX.r3.1HG0019810	--	0	0	0	0	0	0	0	0	0	0	0	0	0	0	0	0	0	0	0	0	0	0	0	0	0	0	0	0	0	0	0	0	0	0	0	0	--	--	--	--	--	--	--	--	--	--	--
HORVU.MOREX.r3.1HG0019830	HORVU.MOREX.r3.1HG0019830	--	0	0	0	0	0	0	0	0	0	0	0	0	0	0	0	0	0	0	0	0	0	0	0	0	0	0	0	0	0	0	0	0	0	0	0	0	--	--	--	--	--	--	--	--	--	--	--
HORVU.MOREX.r3.1HG0019840	HORVU.MOREX.r3.1HG0019840	--	0	0	0	0	0	0	0	0	0	0	0	0	0	0	0	0	0	0	0	0	0	0	0	0	0	0	0	0	0	0	0	0	0	0	0	0	--	--	--	--	--	--	--	--	--	--	--
HORVU.MOREX.r3.1HG0019870	HORVU.MOREX.r3.1HG0019870	LOC109764276	21.3476	2546	22.8889	2664	22.6899	2711	17.2216	1915	17.2829	1935	18.8421	2264	22.6628	3017	21.6815	2413	23.134	3039	21.3541	2386	19.8922	2273	21.1309	2337	22.6185	2765	24.2508	2697	23.1595	2523	23.6981	2721	25.7376	2871	24.1576	2659	0.0996009	-0.131939	normal	0.508277	-0.0476945	normal	0.112786	-0.113238	normal	0.463797	-0.0622751
HORVU.MOREX.r3.1HG0019900	HORVU.MOREX.r3.1HG0019900	--	0.100786	3	0.102908	2	0	0	0	0	0.053669	2	0	0	0	0	0.597473	12	0.07741	2	0.086186	2	0.103829	2	0	0	0	0	0.008667	1	0.047824	1	0.116873	3	0.319168	6	0	0	--	--	--	--	--	--	--	--	--	--	--
HORVU.MOREX.r3.1HG0019910	HORVU.MOREX.r3.1HG0019910	--	0.618233	22	0.275778	10	0.630946	23	1.54872	51	1.9399	65	2.89478	103	0	0	0	0	0	0	0.331736	11	0.374295	13	0.545047	18	0	0	0	0	0	0	0	0	0	0	0	0	5.00731e-07	1.95952	up	--	--	--	--	--	--	3.21631e-08	2.35573
HORVU.MOREX.r3.1HG0019920	HORVU.MOREX.r3.1HG0019920	LOC109764277	52.4747	4466	53.5479	4448	52.2206	4449	45.822	3631	45.2091	3613	50.0853	4291	57.5691	5471	53.1753	4216	53.4319	5013	55.0267	4381	52.9088	4313	56.6472	4476	54.0196	4712	56.3108	4459	52.752	4100	59.3804	4852	57.4583	4571	58.1706	4558	0.716052	0.0286861	normal	0.115455	-0.0887867	normal	0.969014	0.00311529	normal	0.422021	-0.0593336
HORVU.MOREX.r3.1HG0019930	HORVU.MOREX.r3.1HG0019930	--	9.01029	921	8.20097	818	8.35268	855	5.63804	537	5.80799	557	5.92409	610	6.65399	760	6.70204	639	5.60443	631	6.71356	643	6.45629	632	6.71257	633	4.93762	517	5.16372	491	4.35179	406	4.54554	446	4.43499	424	3.85159	361	0.00103965	-0.3606	normal	0.000339395	0.393217	normal	0.661537	0.0650987	normal	0.830527	-0.0294041
HORVU.MOREX.r3.1HG0019940	HORVU.MOREX.r3.1HG0019940	--	0	0	0	0	0	0	0	0	0	0	0	0	0	0	0	0	0	0	0	0	0	0	0	0	0	0	0	0	0	0	0	0	0	0	0	0	--	--	--	--	--	--	--	--	--	--	--
HORVU.MOREX.r3.1HG0019950	HORVU.MOREX.r3.1HG0019950	--	0	0	0	0	0	0	0	0	0	0	0	0	0	0	0	0	0	0	0	0	0	0	0	0	0	0	0	0	0	0	0	0	0	0	0	0	--	--	--	--	--	--	--	--	--	--	--
HORVU.MOREX.r3.1HG0019960	HORVU.MOREX.r3.1HG0019960	--	0.830537	54	0.751788	48	0.909786	60	1.0355	63	1.82834	112	0.757887	50	2.8688	208	2.88369	175	2.65591	190	0.698968	43	1.14184	71	1.42704	86	2.56165	171	2.17672	132	3.28838	195	1.76517	110	2.06802	126	1.56959	94	0.0699682	0.664241	normal	3.94403e-13	-1.70692	down	4.97664e-07	-1.21409	down	0.480948	0.303292
HORVU.MOREX.r3.1HG0019970	HORVU.MOREX.r3.1HG0019970	--	1.28654	79	1.40659	84	1.54356	95	1.22826	70	1.84166	106	1.0393	64	3.63284	247	3.66348	208	3.68997	248	1.14026	65	0.814946	48	0.705575	40	1.95661	123	1.47368	84	1.91491	107	1.19462	70	1.53633	88	1.65417	93	0.699472	0.136559	normal	3.27739e-11	-1.35811	down	4.84295e-17	-1.84685	down	0.0372106	0.762361
HORVU.MOREX.r3.1HG0019980	HORVU.MOREX.r3.1HG0019980	--	16.948	885	18.1561	925	15.6476	818	14.9615	727	13.6892	671	14.3819	756	20.2939	1183	21.7858	1059	20.4257	1175	19.6509	960	18.7575	938	17.833	864	15.2954	818	17.037	828	15.302	730	14.5307	728	17.5754	858	15.5318	747	0.73808	-0.0433656	normal	0.000353096	-0.333607	normal	0.143371	-0.149153	normal	0.0419968	-0.222908
HORVU.MOREX.r3.1HG0019990	HORVU.MOREX.r3.1HG0019990	--	0	0	0	0	0	0	0	0	0	0	0	0	0	0	0	0	0	0	0	0	0	0	0	0	0	0	0	0	0	0	0	0	0	0	0	0	--	--	--	--	--	--	--	--	--	--	--
HORVU.MOREX.r3.1HG0020000	HORVU.MOREX.r3.1HG0020000	--	0	0	0	0	0	0	0	0	0	0	0	0	0	0	0	0	0	0	0	0	0	0	0	0	0	0	0	0	0	0	0	0	0	0	0	0	--	--	--	--	--	--	--	--	--	--	--
HORVU.MOREX.r3.1HG0020010	HORVU.MOREX.r3.1HG0020010	--	0	0	0	0	0	0	0	0	0	0	0	0	0	0	0	0	0	0	0	0	0	0	0	0	0	0	0	0	0	0	0	0	0	0	0	0	--	--	--	--	--	--	--	--	--	--	--
HORVU.MOREX.r3.1HG0020020	HORVU.MOREX.r3.1HG0020020	--	0	0	0	0	0	0	0	0	0	0	0	0	0	0	0	0	0	0	0	0	0	0	0.005365	1	0	0	0	0	0	0	0	0	0	0	0	0	--	--	--	--	--	--	--	--	--	--	--
HORVU.MOREX.r3.1HG0020030	HORVU.MOREX.r3.1HG0020030	--	8.24512	109	8.18342	105	7.39539	98	11.7633	144	15.2121	188	16.4193	217	1.03308	16	1.1777	15	1.42696	21	12.9923	160	8.59132	108	8.06022	99	5.82349	79	4.45339	55	4.27388	52	14.8513	188	14.9714	184	15.7686	191	4.44448e-06	1.01695	up	3.55045e-13	2.4088	up	9.97492e-17	2.41676	up	0.00600606	0.695973
HORVU.MOREX.r3.1HG0020040	HORVU.MOREX.r3.1HG0020040	--	10.065	114	11.6608	129	8.80983	100	15.1336	160	15.9782	170	17.0962	195	0.623149	8	2.48526	27	0.794727	10	12.4645	133	11.6892	127	10.777	114	5.81841	68	5.20317	55	4.76752	50	18.8309	205	18.5789	197	19.4263	203	0.00014045	0.82699	normal	8.36674e-12	2.59337	up	4.24814e-15	2.44694	up	0.00501239	0.613266
HORVU.MOREX.r3.1HG0020050	HORVU.MOREX.r3.1HG0020050	--	16.5419	292	17.3541	299	13.9292	246	19.6831	323	26.8677	445	29.238	519	1.17449	24	1.98396	33	1.67842	33	19.9708	329	19.6471	332	20.6829	339	8.67516	157	9.40216	155	10.3004	166	28.7531	486	30.0046	494	32.7912	532	8.15027e-07	0.839842	normal	5.76419e-38	3.11083	up	4.76508e-57	3.30274	up	0.00346746	0.487499
HORVU.MOREX.r3.1HG0020060	HORVU.MOREX.r3.1HG0020060	--	19.4838	359	20.2161	363	17.4042	321	29.4516	505	28.1093	486	30.693	569	1.94936	41	2.65561	46	2.87083	59	28.5045	491	20.1812	356	24.2784	415	9.84219	186	10.5413	181	10.244	173	40.271	711	32.6469	562	32.7008	554	4.53278e-10	0.812771	normal	1.88657e-41	2.78799	up	8.36757e-54	3.0186	up	0.00381775	0.434851
HORVU.MOREX.r3.1HG0020070	HORVU.MOREX.r3.1HG0020070	--	10.3287	133	12.5033	156	7.08929	91	13.8532	165	11.6193	140	15.329	198	0.932758	14	1.33466	16	0.682806	10	18.5976	223	11.4419	141	10.5738	126	4.06947	54	3.51006	42	6.8924	81	17.5251	216	19.8934	238	17.1637	202	0.0136311	0.616733	normal	1.89644e-17	2.96418	up	9.14379e-26	3.03108	up	0.56806	0.16404
HORVU.MOREX.r3.1HG0020080	HORVU.MOREX.r3.1HG0020080	--	0	0	0	0	0	0	0	0	0	0	0	0	0	0	0	0	0	0	0	0	0	0	0	0	0	0	0	0	0	0	0	0	0	0	0	0	--	--	--	--	--	--	--	--	--	--	--
HORVU.MOREX.r3.1HG0020100	HORVU.MOREX.r3.1HG0020100	--	0	0	0	0	0	0	0	0	0	0	0	0	0	0	0	0	0	0	0	0	0	0	0	0	0	0	0	0	0	0	0.023226	1	0	0	0	0	--	--	--	--	--	--	--	--	--	--	--
HORVU.MOREX.r3.1HG0020120	HORVU.MOREX.r3.1HG0020120	--	0	0	0	0	0	0	0	0	0	0	0	0	0	0	0	0	0	0	0	0	0	0	0	0	0	0	0	0	0.09302	1	0	0	0	0	0	0	--	--	--	--	--	--	--	--	--	--	--
HORVU.MOREX.r3.1HG0020130	HORVU.MOREX.r3.1HG0020130	--	0	0	0	0	0	0	0	0	0	0	0	0	0	0	0	0	0	0	0	0	0	0	0	0	0	0	0	0	0	0	0	0	0	0	0	0	--	--	--	--	--	--	--	--	--	--	--
HORVU.MOREX.r3.1HG0020140	HORVU.MOREX.r3.1HG0020140	--	0	0	0	0	0	0	0	0	0	0	0	0	0	0	0	0	0	0	0	0	0	0	0	0	0.082691	2	0	0	0	0	0	0	0	0	0	0	--	--	--	--	--	--	--	--	--	--	--
HORVU.MOREX.r3.1HG0020170	HORVU.MOREX.r3.1HG0020170	--	0	0	0	0	0	0	0	0	0	0	0	0	0	0	0	0	0	0	0	0	0	0	0	0	0	0	0	0	0	0	0	0	0	0	0	0	--	--	--	--	--	--	--	--	--	--	--
HORVU.MOREX.r3.1HG0020180	HORVU.MOREX.r3.1HG0020180	--	0	0	0	0	0	0	0	0	0	0	0	0	0	0	0	0	0	0	0.161595	9	0	0	0.110838	6	26.275	1571	26.8963	1460	28.1309	1498	31.7274	1776	35.0455	1910	35.7842	1921	--	--	--	--	--	--	--	--	--	--	--
HORVU.MOREX.r3.1HG0020190	HORVU.MOREX.r3.1HG0020190	--	6.91559	443	7.8247	489	8.6437	554	5.16583	308	4.77612	288	5.79749	374	13.0259	932	13.8236	825	12.2847	867	4.57717	275	4.13393	254	4.16481	248	2.35877	155	2.27211	136	2.89581	170	1.84299	114	1.4094	85	1.47493	87	0.0161658	-0.369664	normal	1.87828e-11	-0.770585	normal	3.87013e-42	-1.5613	down	0.00708215	0.447443
HORVU.MOREX.r3.1HG0020200	HORVU.MOREX.r3.1HG0020200	--	0	0	0	0	0	0	0	0	0	0	0	0	0	0	0	0	0	0	0	0	0	0	0	0	0	0	0	0	0	0	0	0	0	0	0	0	--	--	--	--	--	--	--	--	--	--	--
HORVU.MOREX.r3.1HG0020210	HORVU.MOREX.r3.1HG0020210	--	2.61529	210	2.17614	171	2.06108	166	1.19067	89	0.735179	56	1.0195	83	1.39757	126	1.2872	97	1.69894	151	1.33899	101	1.28387	99	1.39467	104	1.26437	104	1.70443	128	1.47922	109	1.39351	108	1.1717	88	0.830699	62	0.000100421	-0.974218	normal	0.0100735	0.580783	normal	0.696421	-0.120538	normal	0.395699	-0.273741
HORVU.MOREX.r3.1HG0020220	HORVU.MOREX.r3.1HG0020220	--	12.4032	1182	14.3757	1337	14.4168	1375	11.1773	992	11.4468	1024	13.6896	1313	14.3614	1528	13.9707	1240	14.344	1507	13.4095	1195	12.6021	1150	11.729	1038	14.7217	1438	12.5532	1113	12.5295	1090	14.034	1284	13.2678	1182	13.8448	1215	0.930086	0.0120855	normal	0.368031	-0.0864048	normal	0.0566707	-0.175438	normal	0.364211	0.106089
HORVU.MOREX.r3.1HG0020240	HORVU.MOREX.r3.1HG0020240	--	0	0	0	0	0	0	0	0	0	0	0	0	0	0	0	0	0	0	0	0	0	0	0	0	0	0	0	0	0	0	0	0	0	0	0	0	--	--	--	--	--	--	--	--	--	--	--
HORVU.MOREX.r3.1HG0020250	HORVU.MOREX.r3.1HG0020250	--	0	0	0	0	0	0	0	0	0	0	0	0	0	0	0	0	0	0	0	0	0	0	0	0	0	0	0	0	0	0	0	0	0	0	0	0	--	--	--	--	--	--	--	--	--	--	--
HORVU.MOREX.r3.1HG0020260	HORVU.MOREX.r3.1HG0020260	--	1.04149	60	1.14494	65	1.07755	62	1.39986	75	0.681259	37	1.20219	70	5.44902	349	4.69172	251	5.39516	341	4.44403	239	4.34291	239	5.22993	279	4.19138	247	5.05341	270	4.39795	231	4.7042	259	4.07802	219	5.42133	286	0.636603	0.186275	normal	1.75477e-28	-2.21158	down	0.478354	-0.141876	normal	9.69812e-14	-1.88527
HORVU.MOREX.r3.1HG0020270	HORVU.MOREX.r3.1HG0020270	--	42.3871	3080	42.6153	3023	44.4491	3233	47.0464	3183	43.3484	2957	41.7371	3053	44.4729	3609	47.3672	3207	46.0145	3686	49.0717	3336	48.8117	3397	50.8112	3428	41.8841	3120	43.4299	2937	42.0954	2793	47.3681	3304	48.8129	3315	46.6276	3119	0.00343181	0.222601	normal	0.0415382	-0.125593	normal	0.0775018	0.108591	normal	0.937165	-0.00725064
HORVU.MOREX.r3.1HG0020280	HORVU.MOREX.r3.1HG0020280	LOC109756396	39.4637	2711	36.7724	2466	35.9433	2472	33.995	2175	32.8283	2118	33.0032	2283	25.2873	1940	20.6416	1322	20.6248	1562	20.3861	1310	20.5848	1355	24.4399	1559	18.0377	1270	15.4415	987	13.6608	857	17.1237	1130	17.8746	1148	19.1457	1211	0.776316	0.0257919	normal	7.13419e-18	0.713354	normal	0.855757	-0.0257065	normal	6.10525e-19	0.771444
HORVU.MOREX.r3.1HG0020290	HORVU.MOREX.r3.1HG0020290	--	1.81963	239	2.10741	270	1.70063	223	1.31605	161	1.63968	202	1.68649	223	1.47269	216	1.71884	210	1.73774	251	1.36717	168	1.84494	232	1.54748	188	2.03459	273	1.82459	223	1.93892	232	1.50084	189	2.07328	254	2.66491	322	0.723985	-0.0796986	normal	0.449886	0.152335	normal	0.85855	-0.0472059	normal	0.597926	0.125653
HORVU.MOREX.r3.1HG0020300	HORVU.MOREX.r3.1HG0020300	--	9.73442	933	10.5096	983	9.42082	904	6.51224	581	6.60755	595	7.5487	728	8.29688	888	7.60188	679	8.45437	893	7.83154	702	9.34208	857	7.73991	689	7.11895	699	6.57367	586	6.87906	602	6.13137	564	5.70074	511	5.37962	475	0.00373861	-0.32411	normal	0.0142981	0.245854	normal	0.841676	0.0308776	normal	0.439079	-0.106828
HORVU.MOREX.r3.1HG0020310	HORVU.MOREX.r3.1HG0020310	--	0	0	0	0	0.030451	2	0	0	0	0	0.026544	1	0.409632	17	0	0	0	0	0.093533	4	0	0	0	0	0.383685	14	0.84992	29	0.275911	9	0.591916	21	0.526861	18	0.530168	18	--	--	--	--	--	--	--	--	--	--	--
HORVU.MOREX.r3.1HG0020320	HORVU.MOREX.r3.1HG0020320	--	0.700728	79	0.594692	65	1.05063	118	0.657991	69	0.621661	66	0.961953	109	1.22907	154	0.593876	62	0.680138	84	0.880111	92	0.751898	81	0.775482	81	0.419537	49	0.352866	37	0.548045	56	0.231201	25	0.542477	57	0.740067	77	0.738923	0.123378	normal	0.76345	-0.117057	normal	0.902281	-0.0494503	normal	0.859523	0.0643742
HORVU.MOREX.r3.1HG0020340	HORVU.MOREX.r3.1HG0020340	--	0	0	0	0	0	0	0	0	0	0	0	0	0	0	0	0	0	0	0	0	0	0	0	0	0	0	0	0	0	0	0	0	0	0	0	0	--	--	--	--	--	--	--	--	--	--	--
HORVU.MOREX.r3.1HG0020350	HORVU.MOREX.r3.1HG0020350	--	0	0	0	0	0	0	0	0	0	0	0	0	0	0	0	0	0	0	0	0	0	0	0	0	0	0	0	0	0	0	0	0	0	0	0	0	--	--	--	--	--	--	--	--	--	--	--
HORVU.MOREX.r3.1HG0020370	HORVU.MOREX.r3.1HG0020370	--	0	0	0	0	0	0	0	0	0	0	0	0	0	0	0	0	0	0	0	0	0	0	0	0	0	0	0	0	0	0	0	0	0	0	0	0	--	--	--	--	--	--	--	--	--	--	--
HORVU.MOREX.r3.1HG0020380	HORVU.MOREX.r3.1HG0020380	--	0	0	0	0	0	0	0	0	0	0	0	0	0	0	0	0	0	0	0	0	0	0	0	0	0	0	0	0	0	0	0	0	0	0	0	0	--	--	--	--	--	--	--	--	--	--	--
HORVU.MOREX.r3.1HG0020390	HORVU.MOREX.r3.1HG0020390	--	0	0	0.03124	2	0.030359	2	0.15065	10	0	0	0	0	0	0	0.098188	7	0.055142	4	0.127994	8	0	0	0.032841	2	0.02727	2	0.030148	2	0	0	0.060559	4	0	0	0.08247	5	--	--	--	--	--	--	--	--	--	--	--
HORVU.MOREX.r3.1HG0020400	HORVU.MOREX.r3.1HG0020400	--	0	0	0	0	0	0	0	0	0	0	0	0	0	0	0	0	0	0	0	0	0	0	0	0	0	0	0	0	0	0	0	0	0	0	0	0	--	--	--	--	--	--	--	--	--	--	--
HORVU.MOREX.r3.1HG0020410	HORVU.MOREX.r3.1HG0020410	--	0	0	0	0	0	0	0	0	0	0	0	0	0	0	0	0	0	0	0	0	0	0	0	0	0	0	0	0	0	0	0	0	0	0	0	0	--	--	--	--	--	--	--	--	--	--	--
HORVU.MOREX.r3.1HG0020430	HORVU.MOREX.r3.1HG0020430	--	0	0	0	0	0	0	0	0	0	0	0	0	0	0	0	0	0	0	0	0	0.012619	1	0	0	0	0	0	0	0	0	0	0	0	0	0	0	--	--	--	--	--	--	--	--	--	--	--
HORVU.MOREX.r3.1HG0020440	HORVU.MOREX.r3.1HG0020440	--	2.09807	112	3.18696	165	3.15579	168	4.65414	230	3.99633	199	4.05693	217	4.94995	294	5.42324	268	6.44546	377	8.94887	444	7.31561	372	9.1456	451	2.90623	158	3.47253	172	3.29302	160	3.03877	155	1.94431	97	2.29679	113	0.000424368	0.757745	normal	6.7833e-07	-1.00008	down	0.000275394	0.569925	normal	4.74746e-07	-0.829647
HORVU.MOREX.r3.1HG0020450	HORVU.MOREX.r3.1HG0020450	--	37.5227	2830	36.6579	2699	37.3119	2817	43.0579	3024	43.9689	3114	40.5544	3079	30.5011	2569	37.8048	2657	39.5461	3288	27.2118	1920	27.5554	1991	28.2097	1976	0.21431	17	0.156744	11	0.128841	9	0.16509	12	0.25299	18	0.178776	13	1.81972e-08	0.387052	normal	0.908053	0.0122158	normal	2.20131e-05	-0.373772	normal	1.30985e-28	0.782192
HORVU.MOREX.r3.1HG0020460	HORVU.MOREX.r3.1HG0020460	--	0	0	0	0	0	0	0	0	0	0	0	0	0	0	0	0	0	0	0	0	0	0	0	0	0	0	0	0	0	0	0	0	0	0	0	0	--	--	--	--	--	--	--	--	--	--	--
HORVU.MOREX.r3.1HG0020470	HORVU.MOREX.r3.1HG0020470	--	0	0	0	0	0	0	0	0	0	0	0	0	0	0	0	0	0	0	0	0	0	0	0	0	0	0	0	0	0	0	0	0	0	0	0	0	--	--	--	--	--	--	--	--	--	--	--
HORVU.MOREX.r3.1HG0020480	HORVU.MOREX.r3.1HG0020480	--	3.23714	66	1.75457	35	2.36529	48	3.00119	57	1.18884	23	3.63398	74	0.853136	20	0.666584	13	1.85085	42	2.76495	53	2.55658	50	3.34857	63	1.72101	36	1.34866	26	1.65752	31	3.04897	60	2.90238	55	4.07333	76	0.594026	0.247821	normal	0.0450043	0.904804	normal	0.00735622	0.974503	normal	0.981159	0.0122963
HORVU.MOREX.r3.1HG0020490	HORVU.MOREX.r3.1HG0020490	--	0	0	0.015892	1	0	0	0	0	0	0	0	0	0	0	0	0	0	0	0	0	0.111157	5	0.037422	2	0.111935	6	0.082399	4	0.036652	2	0	0	0.030528	2	0	0	--	--	--	--	--	--	--	--	--	--	--
HORVU.MOREX.r3.1HG0020500	HORVU.MOREX.r3.1HG0020500	--	2.67918	34	3.02493	37	1.80365	23	0.736168	9	0.534881	7	0.781614	10	3.88612	55	2.99876	35	3.87546	54	1.30578	16	0.590886	8	0.919713	11	5.08092	65	3.65243	43	2.79738	32	1.06155	13	1.27022	15	0.975854	12	--	--	--	0.236837	-0.497289	normal	0.000544346	-1.27974	down	--	--
HORVU.MOREX.r3.1HG0020510	HORVU.MOREX.r3.1HG0020510	--	0.434832	4	0.853934	7	0.313205	3	0	0	0.253537	2	0.315721	3	0.602097	6	1.20789	10	1.47241	14	0.091222	1	0	0	0.147264	2	2.04749	17	1.27722	10	1.57341	12	0.207714	2	0.089964	1	0.634858	5	--	--	--	--	--	--	--	--	--	--	--
HORVU.MOREX.r3.1HG0020520	HORVU.MOREX.r3.1HG0020520	--	1.55001	68	2.13793	91	1.57763	69	0.395699	16	0.370162	16	0.594078	26	3.29074	160	3.88253	157	4.19839	201	0.586197	24	0.570471	24	0.59961	25	3.39041	151	4.20866	170	4.21007	167	0.599925	25	1.22407	50	0.691545	28	2.91398e-05	-1.5573	down	6.98827e-06	-1.09277	down	1.15742e-19	-2.30861	down	--	--
HORVU.MOREX.r3.1HG0020530	HORVU.MOREX.r3.1HG0020530	--	0	0	0	0	0	0	0	0	0	0	0	0	0	0	0	0	0	0	0	0	0	0	0	0	0	0	0	0	0	0	0	0	0	0	0	0	--	--	--	--	--	--	--	--	--	--	--
HORVU.MOREX.r3.1HG0020570	HORVU.MOREX.r3.1HG0020570	--	1.01931	42	0.669775	27	1.16049	48	0	0	0	0	0	0	2.17993	101	2.88312	111	1.93894	88	0	0	0	0	0.027745	2	1.4236	61	1.23521	48	1.30642	50	0	0	0	0	0	0	--	--	--	0.000161282	-1.22884	down	1.8706e-25	-3.64929	down	--	--
HORVU.MOREX.r3.1HG0020580	HORVU.MOREX.r3.1HG0020580	--	3.636	46	4.39358	54	3.30983	42	2.06	24	1.83535	22	2.42327	31	6.51306	91	3.27316	38	4.95675	68	2.59875	31	2.50062	30	2.61148	31	6.32842	81	4.55476	53	4.12777	47	2.71985	33	2.93346	35	0.923481	11	0.171724	-0.571625	normal	0.346545	-0.366789	normal	0.0425554	-0.715161	normal	--	--
HORVU.MOREX.r3.1HG0020590	HORVU.MOREX.r3.1HG0020590	LOC109764606	0	0	0	0	0	0	0	0	0	0	0	0	0	0	0	0	0	0	0	0	0	0	0	0	0	0	0	0	0	0	0	0	0	0	0	0	--	--	--	--	--	--	--	--	--	--	--
HORVU.MOREX.r3.1HG0020620	HORVU.MOREX.r3.1HG0020620	--	1.17637	49	0.794379	32	1.17661	49	0	0	0	0	0	0	2.45319	113	3.27682	126	2.21496	101	0	0	0	0	0.027746	2	1.53631	65	1.6306	63	2.09868	79	0	0	0	0	0	0	--	--	--	3.39726e-05	-1.2675	down	1.29134e-28	-3.83032	down	--	--
HORVU.MOREX.r3.1HG0020630	HORVU.MOREX.r3.1HG0020630	--	0	0	0.017075	1	0	0	0	0	0	0	0	0	0	0	0	0	0	0	0	0	0	0	0.026142	2	0.09954	5	0.057819	3	0.022658	1	0	0	0	0	0	0	--	--	--	--	--	--	--	--	--	--	--
[truncated: 67,367 more rows]
[truncated: 28 more columns]
