# Supplementary material for: Identification and Cloning of a Putative Male Fertility Gene Encoding an Oxidosqualene Cyclase in Qingke
Source: MDPI journal article supplement (doi:10.3390/agronomy13051292), 2023-04-30
Supplement: s1 [file s1 › Appendix A.2.pdf]

>*HvtOSC12*, genomic sequence

ATGTGGAAGCTCAAGATCGCTGAGGGTGGCCCGTGGCTCACGAGTGGCAACAATCATGCCGGA  
AGAGAAACATGGGAGTTTGACCAAAACGACGCCGGATCAAGCGAAGACCGGGATGCGGTGCA  
TGCTGCACGGTCTGAATTCCAGAAGAACAGGTTTAGGACAAGGCACAGCTCTGATGTTTTGGCT  
CGCCTGCAGGTAATTAATGCACTGATATAAACGCACCTTCGTGGTATCTGATGATCCAGCTG  
AATATTTGAAGCGTTATTGTAAGAACTGAGTACATGCTCTGTTTTTTGTTGTGCAGCTAGCAAA  
GGAGAATAACTTCAGCCTTGACCAAAAACAGAAACCAAAAGATGATGAAACTAGTGTCTGTTAT  
CAATATAGCTACGGTGTGCGGAGACACTGGAAAGGGCACTCGGATACTTCTCGGCCATACAAGC  
GCATGATGGGCACTGGCCAGGAGATTTTCCGGGGCCACTCTTACCACAGCAACCATGGTAACT  
AAGATACATCATAATTAACCTTGCTGTTTAATTGTTTGGGTATCACCTTCAAGTGAGTTATAGG  
CTTATAGCCAACATTAGATGCTCATGCACACTATATTCTCATATTCTTGCACTTCCACATGACAT  
TCTTATGTTTATTCTTCTGCTACAGATCATAGTTTTGTATATCACGGAGTCGTTAGGTAGTACG  
CTGTCATCAGAACATCGCAAGGAGATCTGTCGCTATTTGTACAACCGTCAGGTAATTAAGGTGT  
ATATTTGTCAGGAAATTAAGTATGGATACCTTTTAGCAAGTCCTATTTCCACAATATGTATTTT  
GACTGAAACTGATCCTCTGGATGTCTTACAAAATTTATACAAGAAAATAAAAAATGGACTGACC  
CAACTTTTGTATTGTATCAGAATATAGATGGGGGATGGGGACTACACGCGGAAGGCGAAAGC  
TCCATGCTCAGCTCAGCTCTCAACTACACTGCTCTAAGACTGCTTGGCGAGGGTGTGATGATG  
GACCAGACATGTCCATGCCAAAAGCAAGGAAATGGATACATGACCATGGCGGTGCAACGATG  
GTACCCATCTTGGGAAAAGTGTGGCTCTCGGTCAGTTTTATCTTTCTCCTTCTGCCCCAAGTCTCT  
ATCTAGCTATTTTCAGCAAGTGATTACAAAGTTAGCTTGATTGCTGAACATTCGCCGCTTAC  
CTGTGTAGCCTAAATTAATATGTTTGACATCATAATACTCGAATGGAAGCAGAGTTCTTGTTAAT  
ATACTTATTACAAGTCTGAAACCGCATGATTCAATTATGCAGAAGTAATTCAACCAGGGTAAA  
ATTTTGACAAAACCTGCATGCCTGATGCTGCTGCAGGTGCTTGGAGTTTTTGAATGGTCAGGCGTG  
AACCCTATCCCCCAGAATTGTTCTTCTGCCATCCTTGGTTCCTATTCAACCAGGTACGTAGAG  
TTCTTCGCTGGTGGCTAAGTGCTCAACCAGGTAAGAACTTTATTTCTGAGATCAATCATGTTGT  
TTTTCAAATGCAGGAAGATTGTGGAGCCACTTCAGAATGGCTTCATTCCCATGTCCTATTTGTA  
TGGCAAGAAATTTGTTGGCCCAATAACCAAATTTGGTTTTGTCATTAAGAGAAGAGCTACATATT  
CATCCCTACAAAAAGATTAACCTGGAGGCAAGCACGCAAAATGTGTGCAAAGGTGAGTATTACA  
CAAACAATATAATTTTAGCTTCTCCGAGAAAATTTCTTGTTTAGATGTTTCAAGTTTGAAGAATCA  
GTGAGACAACAGATTATGAATTCAAATGCGTGCAGGAAGACGCCTATCACCCACACACCTGGC  
TTCAAGAATGCTTGTCCGACTGCCTTTACAGTTTTGGCGAACCTTTTCTGGCACGTTGGCCGGTTT  
CCTACATGAGAAGAAGAGCTCTACGACAAACTGCCGAGTTTCTGAAATACGAAGATGACAACT  
CACGGTATATCTGCATCGGCGCCGCGCAAAAGGTAAGGCTTACGGAGGTCTTCTCAAAATAATT  
CAGCGCTGGGTTTTTTCAGTGAGCTGTAAAGGAACATGATTTGCTTAAATAGAATAAACATTATT  
ACAGGCACTATCCATGTTATGCTGTTGGTCTGAGAATCCCAATTCAGATGCATTCAAGAACCAC  
TTGGCTAGAGTTGCTGATTTCTGTGGCTCGGCGAAGATGGGATGAAAGTTCGGGTAAATTTTA  
ATGACTCTTGTTTCTGTAATATACAGGGCGAAATATACCCTTCCTATTTAAAATGCATCTCAGTC  
AAACTGAAATTTGTGCACGAACTAACTGATGTTACACGACTTCATTGTTTCAATTCAAAGGTGTG  
TGCAGGTCAATCATGGGATGTCGCTTTCGCCGTGCAAGCGATACTAGCATGTAGTGTGAGAG  
GAATTTGGAAGTACTCTCAAGAAAGCACATCATTTTATAAAAGCGTCACAGGTTTATATTATTT  
ACAGAACTGAATTTTTTGCTATATTTGTCTTGACTTAAATCCTAACTCTACTAACATGATATTTT  
TAAGATTTTGACAATCCTTCTGGTGACTTCGGCAGAAGGTACCGTCACATTTCTAAAGGAGGA  
TGGGCCTTCCAGGTTGCAGATCAGGGTTGGCAGGTTTTCAGATTGCACAGCAGAAGCTCTTAAGG  
TGCGATATATCAAATCGACTAAGGATGCAAAAAAAAAAAAAAAAAAAGTGAACAGGACTAAAATTC

TTGAAACATGCCTTTAATTTTGCTACATGTTGCTACAAAGTAGTGCATTTCACTTTGTTTCATCCT  
TTCAGCCTTTTGTAATTCTTCTTCTGTTTCAGGCTCTGTTACTGCTCTCAAAGTTTCCGTCAGATAT  
CGTTGGCGATCAGATGGAAACATGCCGCTACCATGATGCGGTGAATGTATTACTATCTTTACAG  
GTATGGAACCACATTTCACTTTCAGAGTCCATATCTTGATCTATGCAACGTATATTACAGTTCT  
GTTACAGATTTACACCGATGACAGGCAAATCACAGAGTGAAAATGATTTGACACTAGGTTGTAT  
GCAGAATCCTAATGGTGGCTATGGAACTTGGGAGCTAGCTCGTACATATCCATGGATGGAGGC  
AAGTGTCTGTAAACACCTGCACTGCATGCTATTTTTATTTTGAAATCTAGGCAACTCAACTCAA  
CTCAGCACCTGCACTACATGCTACTATGGCCACAAGATTTCTTAAAGCATCTAACACAATTTCT  
GGATTGGAGGATATCACAGCGCATAGCAGTAGCTAACTGTACACAAGTAGATCATTGGGTAGT  
GAGACTTCTAACATCTTTTCCCCTTTTCAGAACTTAAACATGACAGAGATATATGCAGACATCAT  
GGTGGAGCATCAGTAAGGAATTTACATCCTTTCTTACCAATAGCTCTCGCATGTGACTCGATATT  
AAGACGCATACATATCGCAGGTACGTCTGAGTGCACCTCGTCGGTCATCCAGGCATTGGCCCTGT  
TTCGGCAAAAATACCCGGGCATCGGGAAGATGAAATAGAACAGTGCATCAGGAGAGCGACA  
GAGTTCATCGAGAAGTTACAGAATGAGGACGGTTCATGGTCAGTACAGCATGAACAATTTTGTA  
GTGTTTATATCAAAGAGAAGGTCTGTTGTGCGACGCATTGATCAATAAGTTGTTCTGCAGGTTTG  
ATCATGGGGTATTTGCTTCACATATGGCACATGGTTCGCTATAGAGGGCCTGTCAGCAGTTGGA  
CAGTGTACGATAATAGCACCTACATTCGGAAGGGTTGCCAGTTTCTATTATCGAAGCAGCTAA  
CGAATGGTGGATGGGGTGAGAGTCATCTTTCATCCACAACCAAGGTAAACGCTGGCTTCTTATG  
TTGATGAAAAAAGGTGCTCACATCTTAGAGAAAATCAAGCATCCTAACAAGGAGAAGATCA  
AGCATCTTGACAGAAAATTTTATTTATTCTTGCTTCAATATACAGAATTCTGCAGTTTCTACGGG  
AACTGATCATACGTGTCATCTCAAATTCTAAACAGGCATACACGAACCTTGACGGGGAGAAAT  
CGCATGTAGTCAACACGGCGTGGGCAATGTTGGCACTAATGAAAGCTGGACAGGTGACCACTT  
ATCTTCCTCTCTCCAATATTATAGTGCCTGAACATTGGAGGAAAAAAGCCCTTCCAAAATGGCC  
AGTGACCTTTGGACCCAGAATAACTGAACCAATATTATAGTATCAACTTCTGATCTTGAAAAA  
AATCATAAGATAACTTCAAGGTTCAAGTTCTAATTCAATTGAATTATGAAGTACTATCGAATTA  
AATCCAGCTTTTTTTTCTCCAATGTTTCAGGCCGAAAGAGATCCATCTCCTTTGCACGAAGCAGCA  
AGACTTATCATGAGCATGCAGCTTGGAATGGTGACTTCCCACAGGAGGTAACCTAACAGCTAC  
AATGTACCATATGTAACACAATTTAAACCGAGATCTTGTTTTATCGATGCTATAATAATAACAT  
GATTTGTGTATTACGTATGTAGGAAATGATCGGAAGTTTCTTGAAAAATGGCCCCCTTGTTTATA  
TGGCTTATCGCAATATATTCCCCATATGGGCCCTTGAGAGTATCATAGATTGGTACTTTGCTCC  
GATTAA
