# Supplementary material for: Identification and Cloning of a Putative Male Fertility Gene Encoding an Oxidosqualene Cyclase in Qingke
Source: MDPI journal article supplement (doi:10.3390/agronomy13051292), 2023-04-30
Supplement: s1 [file s1 › Appendix A.3.pdf]

>*HvtOSC12*, promoter sequence

CCTCCGTA CTACCATCGCAACTGCATGAGCGAGTTCATGGGGCTCATCTACGGCGTATACGAGG  
TAATAAATCTCTAGCCTCGGTATAAGCTGAGCTGAACCTGTTATCTGTTTCCTGAACTGAACCTG  
TCATTTGTAATCCTGGACTGAACTGAGCTGAACTTCACAACACAGGCTAAAGCCGATGGTTTCC  
TTCCCGGAGGCGCGAGCCTGCACAGCTGCATGACGCCGCACGGGCCGGACACCAAGACGTACG  
AGGCGACCATCAGCAAGCTCGGTGGGCCGGACGCCAACACGCCGACGAGGCTGAGCGGCACT  
TTGGCCTTCATGTTTGAGTCGGCGCTGATCCCGCGCGTGTGCCGCTGGGCTCTGGAGTCGCCGTC  
CCGGGATCTGGACTACTACCAGTGCTGGATCGGGCTCAAATCCCACTTCTCACATGTCGAAGAT  
GACGGTGATGGACCGGCGACAACCGGGGATAATGACAAGGATGGCGAGAAGTAGCTCTGTTTC  
CCCCAGGTAGGAAATGAAGGGGAATTCCTAGGCCATGTATGTATACTAGTTGTTACTTGTGTAA  
AGGGAGAAAACAAACAGTAATGCAGTAGGGATAAATAAGCAGAATGTGCAGCATGCATGTAC  
AATCAATCCCTATCCTATCCATTCCTATCACCATGTCATGTGTATACATAATAATAGCATTAGCA  
GAAAAGCATGTACATTGACGGTGTGAGCAGTTGCAAGTTTTCTGGTTAGCAGCCTGTTTATTGG  
CTGATTGTACCCTGACCACATTTGTTGAATAAAGCTCCCCTAGTTAATTCTGCAAGGAAGAAGA  
TGCAACTAACCGCATCGAAAGAGGATCCTAGTTAATTCTGGAATAATTTGGCTGCACCTTCAGT  
CTTCTGCTTGCTGTGTTGTGTTGAAATCAGTTATGTGTGCACCTTCAGTCTAACTAGCTAGAGTGT  
GTGATTGTTTCATGGAACAGCTAGCTAGCTAGCTAGTACTGAAGATTGCGGAGATGAGGGAGG  
GAGGGTCTCTGAATTCCTGGCAACTTGCTCTGCATTTGTTTCATGGTTGCCTGAAAATATAAAT  
CTAATTCAAGTGTGCAATTTATCTTTCTCGACTCAGGAGAGCAGTTCGGGATGGGTGTCTGTGTC  
TTCAACTTTTAGGCGTTGCAGTTATCAACTTATATAAAATGTTTCTACTTGCACAATCTTCTTTCT  
TTCTACAATTAACCACTGTATTTGGGCCGTCAGTTATTTGCACCTGGATTGAATATACAGAGCGC  
TTCAGAAGTATGGACTTAAGCAAATTCGGCAACCAAATTTTCATATTTAGAAAGAACATTAATG  
AATCGTAAGACGAAAGGGGGCAACAACTCCATAGCGAAATCGGCTAAATATATCATCGGTAG  
GGCACACGATTGGTTTCAGAGTGCACCTACACAATTCACACTCTTACGTTTTTCATCGAATTTTCA  
TAAACCATTTGAACAAATGAGATGGATGATGTGCCGCACTCATACGGCACGCACCGAGAATCG  
CATGACGGTGCAGCATGCATAAGCTATTTCCCCCTGGTTTGCAGCTGCCAAGCAAGCTCCATCC  
ACATCTAGCACGCAACACGAAGGCCTCATCGGGTTCCTGGTGATTTGCCCCGCCCCGCTTCCCT  
GGACATATAAACACATTCGGGCCAATTCTTCATGCATCATCCCATGCTGCCACTCCGGCCGACC  
GGGATGTACAACATTCTACTCATCACCTGCTTCCTTCATTTGGCGTTGGTAGGGTGGCTGATCG  
GTGCGCACGCTCATCTGTGATTCCCTCCCGCTGTGATCGTGCCTGCTAACAACCTGCAAATCAA  
ATATTCTGTAGGTGCTGTGATGCTCTCTTATTTATGTCAGTACTGTTTGATGTTTACATGCCATGTT  
TTCTATTTCAAAAATAAAATTAATTATATCGAACTACTGCATTCATGGACAAAGGTGACAAAAG  
GAGAGTAAATCCCCCTTTCGGGTATGGATATTTCTTTCCAAAGTATCTGACCAATTAATCCTC  
CTTTTGCCATCAGTTTGGTTAGTGGCAGAAGAACAATGTGTTTGTGCTGTAAAATATAT
