# Supplementary material for: Identification and Cloning of a Putative Male Fertility Gene Encoding an Oxidosqualene Cyclase in Qingke
Source: MDPI journal article supplement (doi:10.3390/agronomy13051292), 2023-04-30
Supplement: s1 [file s1 › Appendix A.4.xlsx]

## Sheet: classification
#ID	Family	Type
HORVU.MOREX.r3.1HG0000130	Others	TR
HORVU.MOREX.r3.1HG0000290	B3	TF
HORVU.MOREX.r3.1HG0002030	C2H2	TF
HORVU.MOREX.r3.1HG0002230	C2H2	TF
HORVU.MOREX.r3.1HG0002750	MADS-M-type	TF
HORVU.MOREX.r3.1HG0002870	C2H2	TF
HORVU.MOREX.r3.1HG0003970	AP2/ERF-ERF	TF
HORVU.MOREX.r3.1HG0004640	GRAS	TF
HORVU.MOREX.r3.1HG0004650	GRAS	TF
HORVU.MOREX.r3.1HG0004670	GRAS	TF
HORVU.MOREX.r3.1HG0004840	GRAS	TF
HORVU.MOREX.r3.1HG0005760	AP2/ERF-ERF	TF
HORVU.MOREX.r3.1HG0005830	C2C2-Dof	TF
HORVU.MOREX.r3.1HG0006070	HB-other	TF
HORVU.MOREX.r3.1HG0007240	C2H2	TF
HORVU.MOREX.r3.1HG0007250	C2H2	TF
HORVU.MOREX.r3.1HG0007300	Others	TR
HORVU.MOREX.r3.1HG0007420	B3	TF
HORVU.MOREX.r3.1HG0007510	B3	TF
HORVU.MOREX.r3.1HG0008000	FAR1	TF
HORVU.MOREX.r3.1HG0008600	MADS-MIKC	TF
HORVU.MOREX.r3.1HG0008610	MADS-MIKC	TF
HORVU.MOREX.r3.1HG0008950	SET	TR
HORVU.MOREX.r3.1HG0009030	TRAF	TR
HORVU.MOREX.r3.1HG0009050	MYB	TF
HORVU.MOREX.r3.1HG0010970	HB-WOX	TF
HORVU.MOREX.r3.1HG0011380	C2H2	TF
HORVU.MOREX.r3.1HG0012250	AP2/ERF-AP2	TF
HORVU.MOREX.r3.1HG0012680	B3	TF
HORVU.MOREX.r3.1HG0012720	FAR1	TF
HORVU.MOREX.r3.1HG0012990	C2H2	TF
HORVU.MOREX.r3.1HG0013280	LOB	TF
HORVU.MOREX.r3.1HG0014340	PHD	TR
HORVU.MOREX.r3.1HG0014730	PLATZ	TF
HORVU.MOREX.r3.1HG0014740	MYB-related	TF
HORVU.MOREX.r3.1HG0015250	C3H	TF
HORVU.MOREX.r3.1HG0015430	Trihelix	TF
HORVU.MOREX.r3.1HG0016310	bZIP	TF
HORVU.MOREX.r3.1HG0016370	HB-KNOX	TF
HORVU.MOREX.r3.1HG0017050	MYB	TF
HORVU.MOREX.r3.1HG0017240	DBP	TF
HORVU.MOREX.r3.1HG0018350	AUX/IAA	TR
HORVU.MOREX.r3.1HG0018510	bHLH	TF
HORVU.MOREX.r3.1HG0018590	MYB	TF
HORVU.MOREX.r3.1HG0018630	B3	TF
HORVU.MOREX.r3.1HG0018760	C2H2	TF
HORVU.MOREX.r3.1HG0019240	GNAT	TR
HORVU.MOREX.r3.1HG0019580	mTERF	TR
HORVU.MOREX.r3.1HG0019730	SNF2	TR
HORVU.MOREX.r3.1HG0020170	B3	TF
HORVU.MOREX.r3.1HG0020890	FAR1	TF
HORVU.MOREX.r3.1HG0021280	bHLH	TF
HORVU.MOREX.r3.1HG0021290	NAC	TF
HORVU.MOREX.r3.1HG0021740	FAR1	TF
HORVU.MOREX.r3.1HG0022380	C2H2	TF
HORVU.MOREX.r3.1HG0022440	SNF2	TR
HORVU.MOREX.r3.1HG0022760	TRAF	TR
HORVU.MOREX.r3.1HG0022790	NAC	TF
HORVU.MOREX.r3.1HG0022890	MYB	TF
HORVU.MOREX.r3.1HG0023970	C2C2-GATA	TF
HORVU.MOREX.r3.1HG0024370	Jumonji	TR
HORVU.MOREX.r3.1HG0024860	MADS-MIKC	TF
HORVU.MOREX.r3.1HG0025510	MYB-related	TF
HORVU.MOREX.r3.1HG0025550	Alfin-like	TF
HORVU.MOREX.r3.1HG0025660	bHLH	TF
HORVU.MOREX.r3.1HG0025890	LOB	TF
HORVU.MOREX.r3.1HG0025910	B3	TF
HORVU.MOREX.r3.1HG0026290	C2H2	TF
HORVU.MOREX.r3.1HG0026400	NAC	TF
HORVU.MOREX.r3.1HG0027080	B3	TF
HORVU.MOREX.r3.1HG0027200	AUX/IAA	TR
HORVU.MOREX.r3.1HG0027530	SET	TR
HORVU.MOREX.r3.1HG0027800	C3H	TF
HORVU.MOREX.r3.1HG0029280	HMG	TR
HORVU.MOREX.r3.1HG0029360	WRKY	TF
HORVU.MOREX.r3.1HG0029690	B3	TF
HORVU.MOREX.r3.1HG0029890	AUX/IAA	TR
HORVU.MOREX.r3.1HG0031260	MADS-MIKC	TF
HORVU.MOREX.r3.1HG0031320	GNAT	TR
HORVU.MOREX.r3.1HG0031520	MYB	TF
HORVU.MOREX.r3.1HG0032910	Jumonji	TR
HORVU.MOREX.r3.1HG0033120	TRAF	TR
HORVU.MOREX.r3.1HG0035840	C2H2	TF
HORVU.MOREX.r3.1HG0035920	GNAT	TR
HORVU.MOREX.r3.1HG0037890	FAR1	TF
HORVU.MOREX.r3.1HG0038550	E2F-DP	TF
HORVU.MOREX.r3.1HG0039150	AP2/ERF-ERF	TF
HORVU.MOREX.r3.1HG0039230	ARID	TR
HORVU.MOREX.r3.1HG0040050	SNF2	TR
HORVU.MOREX.r3.1HG0040370	AP2/ERF-ERF	TF
HORVU.MOREX.r3.1HG0041130	TRAF	TR
HORVU.MOREX.r3.1HG0041150	Others	TR
HORVU.MOREX.r3.1HG0043220	MYB	TF
HORVU.MOREX.r3.1HG0043330	C2H2	TF
HORVU.MOREX.r3.1HG0043670	B3-ARF	TF
HORVU.MOREX.r3.1HG0043710	HB-HD-ZIP	TF
HORVU.MOREX.r3.1HG0044910	SNF2	TR
HORVU.MOREX.r3.1HG0046120	C2H2	TF
HORVU.MOREX.r3.1HG0046890	C2C2-Dof	TF
HORVU.MOREX.r3.1HG0047510	GNAT	TR
HORVU.MOREX.r3.1HG0048060	LIM	TF
HORVU.MOREX.r3.1HG0049130	SET	TR
HORVU.MOREX.r3.1HG0049220	C2C2-YABBY	TF
HORVU.MOREX.r3.1HG0049410	Trihelix	TF
HORVU.MOREX.r3.1HG0049430	B3	TF
HORVU.MOREX.r3.1HG0049700	SWI/SNF-BAF60b	TR
HORVU.MOREX.r3.1HG0051600	AP2/ERF-ERF	TF
HORVU.MOREX.r3.1HG0051920	bZIP	TF
HORVU.MOREX.r3.1HG0052060	OFP	TF
HORVU.MOREX.r3.1HG0052320	HB-BELL	TF
HORVU.MOREX.r3.1HG0052450	NAC	TF
HORVU.MOREX.r3.1HG0053060	PLATZ	TF
HORVU.MOREX.r3.1HG0053170	bHLH	TF
HORVU.MOREX.r3.1HG0053250	HB-HD-ZIP	TF
HORVU.MOREX.r3.1HG0053590	Jumonji	TR
HORVU.MOREX.r3.1HG0053860	WRKY	TF
HORVU.MOREX.r3.1HG0054220	MADS-M-type	TF
HORVU.MOREX.r3.1HG0054310	B3	TF
HORVU.MOREX.r3.1HG0054480	MYB	TF
HORVU.MOREX.r3.1HG0054640	GARP-G2-like	TF
HORVU.MOREX.r3.1HG0055310	AP2/ERF-ERF	TF
HORVU.MOREX.r3.1HG0055800	B3	TF
HORVU.MOREX.r3.1HG0055960	GRAS	TF
HORVU.MOREX.r3.1HG0056120	B3	TF
HORVU.MOREX.r3.1HG0056220	FAR1	TF
HORVU.MOREX.r3.1HG0056540	C2H2	TF
HORVU.MOREX.r3.1HG0056640	bHLH	TF
HORVU.MOREX.r3.1HG0056980	STAT	TF
HORVU.MOREX.r3.1HG0057540	Trihelix	TF
HORVU.MOREX.r3.1HG0057750	AP2/ERF-ERF	TF
HORVU.MOREX.r3.1HG0057900	MYB-related	TF
HORVU.MOREX.r3.1HG0057960	HB-HD-ZIP	TF
HORVU.MOREX.r3.1HG0057970	MYB-related	TF
HORVU.MOREX.r3.1HG0058140	AP2/ERF-ERF	TF
HORVU.MOREX.r3.1HG0058180	Others	TR
HORVU.MOREX.r3.1HG0058200	FAR1	TF
HORVU.MOREX.r3.1HG0058390	C2C2-GATA	TF
HORVU.MOREX.r3.1HG0058550	AP2/ERF-ERF	TF
HORVU.MOREX.r3.1HG0058810	SET	TR
HORVU.MOREX.r3.1HG0058870	B3	TF
HORVU.MOREX.r3.1HG0058900	SRS	TF
HORVU.MOREX.r3.1HG0058960	AP2/ERF-ERF	TF
HORVU.MOREX.r3.1HG0060770	AP2/ERF-ERF	TF
HORVU.MOREX.r3.1HG0060800	WRKY	TF
HORVU.MOREX.r3.1HG0061960	C2H2	TF
HORVU.MOREX.r3.1HG0062030	AP2/ERF-ERF	TF
HORVU.MOREX.r3.1HG0062200	AP2/ERF-ERF	TF
HORVU.MOREX.r3.1HG0062250	LOB	TF
HORVU.MOREX.r3.1HG0062390	AP2/ERF-ERF	TF
HORVU.MOREX.r3.1HG0062640	SBP	TF
HORVU.MOREX.r3.1HG0063030	MYB	TF
HORVU.MOREX.r3.1HG0063060	mTERF	TR
HORVU.MOREX.r3.1HG0063280	mTERF	TR
HORVU.MOREX.r3.1HG0063290	FAR1	TF
HORVU.MOREX.r3.1HG0063780	TRAF	TR
HORVU.MOREX.r3.1HG0064430	SNF2	TR
HORVU.MOREX.r3.1HG0064570	AP2/ERF-ERF	TF
HORVU.MOREX.r3.1HG0065020	bZIP	TF
HORVU.MOREX.r3.1HG0065060	MADS-MIKC	TF
HORVU.MOREX.r3.1HG0065130	NAC	TF
HORVU.MOREX.r3.1HG0065340	SWI/SNF-BAF60b	TR
HORVU.MOREX.r3.1HG0065400	AP2/ERF-ERF	TF
HORVU.MOREX.r3.1HG0065420	SNF2	TR
HORVU.MOREX.r3.1HG0065500	MADS-MIKC	TF
HORVU.MOREX.r3.1HG0065530	CSD	TF
HORVU.MOREX.r3.1HG0065590	Alfin-like	TF
HORVU.MOREX.r3.1HG0065610	NAC	TF
HORVU.MOREX.r3.1HG0066110	LOB	TF
HORVU.MOREX.r3.1HG0066240	IWS1	TR
HORVU.MOREX.r3.1HG0066310	mTERF	TR
HORVU.MOREX.r3.1HG0066390	GARP-G2-like	TF
HORVU.MOREX.r3.1HG0066710	AP2/ERF-ERF	TF
HORVU.MOREX.r3.1HG0066720	Others	TR
HORVU.MOREX.r3.1HG0067040	NAC	TF
HORVU.MOREX.r3.1HG0067390	C2H2	TF
HORVU.MOREX.r3.1HG0067850	GRAS	TF
HORVU.MOREX.r3.1HG0068660	MYB-related	TF
HORVU.MOREX.r3.1HG0068710	AP2/ERF-ERF	TF
HORVU.MOREX.r3.1HG0068750	AP2/ERF-ERF	TF
HORVU.MOREX.r3.1HG0068860	C2H2	TF
HORVU.MOREX.r3.1HG0068870	mTERF	TR
HORVU.MOREX.r3.1HG0069100	bZIP	TF
HORVU.MOREX.r3.1HG0069320	MADS-M-type	TF
HORVU.MOREX.r3.1HG0069390	NF-YC	TF
HORVU.MOREX.r3.1HG0069640	bZIP	TF
HORVU.MOREX.r3.1HG0069670	GARP-G2-like	TF
HORVU.MOREX.r3.1HG0069800	SET	TR
HORVU.MOREX.r3.1HG0069820	MYB	TF
HORVU.MOREX.r3.1HG0070040	bZIP	TF
HORVU.MOREX.r3.1HG0070150	GARP-G2-like	TF
HORVU.MOREX.r3.1HG0070370	GRAS	TF
HORVU.MOREX.r3.1HG0070400	FAR1	TF
HORVU.MOREX.r3.1HG0070660	B3	TF
HORVU.MOREX.r3.1HG0070690	GNAT	TR
HORVU.MOREX.r3.1HG0070870	WRKY	TF
HORVU.MOREX.r3.1HG0070890	WRKY	TF
HORVU.MOREX.r3.1HG0070900	WRKY	TF
HORVU.MOREX.r3.1HG0070910	WRKY	TF
HORVU.MOREX.r3.1HG0071130	OFP	TF
HORVU.MOREX.r3.1HG0071500	WRKY	TF
HORVU.MOREX.r3.1HG0071700	AP2/ERF-ERF	TF
HORVU.MOREX.r3.1HG0071990	AP2/ERF-ERF	TF
HORVU.MOREX.r3.1HG0072420	C3H	TF
HORVU.MOREX.r3.1HG0072650	Others	TR
HORVU.MOREX.r3.1HG0072670	bHLH	TF
HORVU.MOREX.r3.1HG0072800	SNF2	TR
HORVU.MOREX.r3.1HG0072890	NF-YB	TF
HORVU.MOREX.r3.1HG0073260	C2H2	TF
HORVU.MOREX.r3.1HG0073340	C2C2-GATA	TF
HORVU.MOREX.r3.1HG0073480	MYB	TF
HORVU.MOREX.r3.1HG0073880	bHLH	TF
HORVU.MOREX.r3.1HG0073900	HB-BELL	TF
HORVU.MOREX.r3.1HG0073910	SNF2	TR
HORVU.MOREX.r3.1HG0074070	B3	TF
HORVU.MOREX.r3.1HG0074190	C2C2-LSD	TF
HORVU.MOREX.r3.1HG0074280	MYB	TF
HORVU.MOREX.r3.1HG0074710	C2H2	TF
HORVU.MOREX.r3.1HG0074720	bZIP	TF
HORVU.MOREX.r3.1HG0074840	NAC	TF
HORVU.MOREX.r3.1HG0074910	MYB-related	TF
HORVU.MOREX.r3.1HG0074960	OFP	TF
HORVU.MOREX.r3.1HG0074970	OFP	TF
HORVU.MOREX.r3.1HG0075010	FAR1	TF
HORVU.MOREX.r3.1HG0075080	C2C2-Dof	TF
HORVU.MOREX.r3.1HG0075320	MYB	TF
HORVU.MOREX.r3.1HG0075450	FAR1	TF
HORVU.MOREX.r3.1HG0075860	bZIP	TF
HORVU.MOREX.r3.1HG0075890	TUB	TF
HORVU.MOREX.r3.1HG0076900	C2C2-GATA	TF
HORVU.MOREX.r3.1HG0077220	HB-PHD	TF
HORVU.MOREX.r3.1HG0077310	OFP	TF
HORVU.MOREX.r3.1HG0077430	VOZ	TF
HORVU.MOREX.r3.1HG0077510	B3-ARF	TF
HORVU.MOREX.r3.1HG0077560	Trihelix	TF
HORVU.MOREX.r3.1HG0077610	C2C2-Dof	TF
HORVU.MOREX.r3.1HG0077640	TUB	TF
HORVU.MOREX.r3.1HG0077760	FAR1	TF
HORVU.MOREX.r3.1HG0077830	TCP	TF
HORVU.MOREX.r3.1HG0078350	bZIP	TF
HORVU.MOREX.r3.1HG0078480	FAR1	TF
HORVU.MOREX.r3.1HG0078500	AP2/ERF-ERF	TF
HORVU.MOREX.r3.1HG0078520	FAR1	TF
HORVU.MOREX.r3.1HG0078550	FAR1	TF
HORVU.MOREX.r3.1HG0078750	CPP	TF
HORVU.MOREX.r3.1HG0079000	bHLH	TF
HORVU.MOREX.r3.1HG0079180	TRAF	TR
HORVU.MOREX.r3.1HG0079700	MYB-related	TF
HORVU.MOREX.r3.1HG0079750	MYB	TF
HORVU.MOREX.r3.1HG0079760	MYB	TF
HORVU.MOREX.r3.1HG0080510	SET	TR
HORVU.MOREX.r3.1HG0080560	MYB-related	TF
HORVU.MOREX.r3.1HG0080910	B3	TF
HORVU.MOREX.r3.1HG0080920	WRKY	TF
HORVU.MOREX.r3.1HG0080940	WRKY	TF
HORVU.MOREX.r3.1HG0081030	AP2/ERF-AP2	TF
HORVU.MOREX.r3.1HG0081770	NF-YC	TF
HORVU.MOREX.r3.1HG0082040	HSF	TF
HORVU.MOREX.r3.1HG0082370	WRKY	TF
HORVU.MOREX.r3.1HG0082640	AUX/IAA	TR
HORVU.MOREX.r3.1HG0082680	C2H2	TF
HORVU.MOREX.r3.1HG0082810	C3H	TF
HORVU.MOREX.r3.1HG0083130	AP2/ERF-ERF	TF
HORVU.MOREX.r3.1HG0083140	AP2/ERF-ERF	TF
HORVU.MOREX.r3.1HG0083280	FAR1	TF
HORVU.MOREX.r3.1HG0083340	AP2/ERF-RAV	TF
HORVU.MOREX.r3.1HG0083370	AP2/ERF-RAV	TF
HORVU.MOREX.r3.1HG0083610	HB-HD-ZIP	TF
HORVU.MOREX.r3.1HG0083950	HSF	TF
HORVU.MOREX.r3.1HG0084480	TRAF	TR
HORVU.MOREX.r3.1HG0084760	MYB	TF
HORVU.MOREX.r3.1HG0085200	C2H2	TF
HORVU.MOREX.r3.1HG0085510	NAC	TF
HORVU.MOREX.r3.1HG0086460	AUX/IAA	TR
HORVU.MOREX.r3.1HG0086920	Trihelix	TF
HORVU.MOREX.r3.1HG0087450	HB-other	TF
HORVU.MOREX.r3.1HG0087670	B3-ARF	TF
HORVU.MOREX.r3.1HG0087800	B3	TF
HORVU.MOREX.r3.1HG0088440	HB-WOX	TF
HORVU.MOREX.r3.1HG0088460	AP2/ERF-ERF	TF
HORVU.MOREX.r3.1HG0088760	WRKY	TF
HORVU.MOREX.r3.1HG0089470	FAR1	TF
HORVU.MOREX.r3.1HG0089570	WRKY	TF
HORVU.MOREX.r3.1HG0089600	MYB-related	TF
HORVU.MOREX.r3.1HG0089620	MYB-related	TF
HORVU.MOREX.r3.1HG0089650	MYB-related	TF
HORVU.MOREX.r3.1HG0089660	MYB-related	TF
HORVU.MOREX.r3.1HG0089690	MYB-related	TF
HORVU.MOREX.r3.1HG0089710	MYB-related	TF
HORVU.MOREX.r3.1HG0089740	MYB-related	TF
HORVU.MOREX.r3.1HG0090040	MYB	TF
HORVU.MOREX.r3.1HG0090320	bZIP	TF
HORVU.MOREX.r3.1HG0090460	WRKY	TF
HORVU.MOREX.r3.1HG0090470	WRKY	TF
HORVU.MOREX.r3.1HG0090480	WRKY	TF
HORVU.MOREX.r3.1HG0090520	WRKY	TF
HORVU.MOREX.r3.1HG0090590	AP2/ERF-ERF	TF
HORVU.MOREX.r3.1HG0090720	GARP-G2-like	TF
HORVU.MOREX.r3.1HG0090760	NF-YB	TF
HORVU.MOREX.r3.1HG0091000	GRAS	TF
HORVU.MOREX.r3.1HG0091040	C3H	TF
HORVU.MOREX.r3.1HG0091060	C3H	TF
HORVU.MOREX.r3.1HG0091840	C2C2-GATA	TF
HORVU.MOREX.r3.1HG0091890	zf-HD	TF
HORVU.MOREX.r3.1HG0091980	MYB-related	TF
HORVU.MOREX.r3.1HG0091990	MYB-related	TF
HORVU.MOREX.r3.1HG0092140	MYB	TF
HORVU.MOREX.r3.1HG0092420	WRKY	TF
HORVU.MOREX.r3.1HG0092700	WRKY	TF
HORVU.MOREX.r3.1HG0093330	SET	TR
HORVU.MOREX.r3.1HG0093350	SET	TR
HORVU.MOREX.r3.1HG0093460	CPP	TF
HORVU.MOREX.r3.1HG0093510	CPP	TF
HORVU.MOREX.r3.1HG0093590	Others	TR
HORVU.MOREX.r3.1HG0093610	Others	TR
HORVU.MOREX.r3.1HG0093770	Jumonji	TR
HORVU.MOREX.r3.1HG0094470	Trihelix	TF
HORVU.MOREX.r3.1HG0094930	SNF2	TR
HORVU.MOREX.r3.1HG0095180	Others	TR
HORVU.MOREX.r3.1HG0095200	Others	TR
HORVU.MOREX.r3.1HG0095230	Others	TR
HORVU.MOREX.r3.1HG0095300	Others	TR
HORVU.MOREX.r3.1HG0095330	C3H	TF
HORVU.MOREX.r3.1HG0095390	C2H2	TF
HORVU.MOREX.r3.2HG0095490	Others	TR
HORVU.MOREX.r3.2HG0096000	C2H2	TF
HORVU.MOREX.r3.2HG0096010	C2H2	TF
HORVU.MOREX.r3.2HG0096180	SET	TR
HORVU.MOREX.r3.2HG0096440	C3H	TF
HORVU.MOREX.r3.2HG0096500	B3	TF
HORVU.MOREX.r3.2HG0096750	WRKY	TF
HORVU.MOREX.r3.2HG0097030	Rcd1-like	TR
HORVU.MOREX.r3.2HG0097120	PHD	TR
HORVU.MOREX.r3.2HG0097300	AP2/ERF-ERF	TF
HORVU.MOREX.r3.2HG0097600	Others	TR
HORVU.MOREX.r3.2HG0097730	B3	TF
HORVU.MOREX.r3.2HG0097880	TCP	TF
HORVU.MOREX.r3.2HG0098150	WRKY	TF
HORVU.MOREX.r3.2HG0099090	NAC	TF
HORVU.MOREX.r3.2HG0099690	E2F-DP	TF
HORVU.MOREX.r3.2HG0100410	C3H	TF
HORVU.MOREX.r3.2HG0100540	PHD	TR
HORVU.MOREX.r3.2HG0100570	TAZ	TR
HORVU.MOREX.r3.2HG0100800	AP2/ERF-ERF	TF
HORVU.MOREX.r3.2HG0100810	AP2/ERF-ERF	TF
HORVU.MOREX.r3.2HG0101120	WRKY	TF
HORVU.MOREX.r3.2HG0102490	TCP	TF
HORVU.MOREX.r3.2HG0103110	B3	TF
HORVU.MOREX.r3.2HG0103320	B3	TF
HORVU.MOREX.r3.2HG0103750	ARID	TR
HORVU.MOREX.r3.2HG0103780	SNF2	TR
HORVU.MOREX.r3.2HG0104050	C2H2	TF
HORVU.MOREX.r3.2HG0104100	AP2/ERF-ERF	TF
HORVU.MOREX.r3.2HG0104390	B3	TF
HORVU.MOREX.r3.2HG0104540	MYB	TF
HORVU.MOREX.r3.2HG0105140	GRAS	TF
HORVU.MOREX.r3.2HG0105310	MYB-related	TF
HORVU.MOREX.r3.2HG0105320	AUX/IAA	TR
HORVU.MOREX.r3.2HG0105340	TRAF	TR
HORVU.MOREX.r3.2HG0105370	NAC	TF
HORVU.MOREX.r3.2HG0105380	NAC	TF
HORVU.MOREX.r3.2HG0105660	AP2/ERF-ERF	TF
HORVU.MOREX.r3.2HG0106920	B3	TF
HORVU.MOREX.r3.2HG0106930	B3	TF
HORVU.MOREX.r3.2HG0107380	C2C2-Dof	TF
HORVU.MOREX.r3.2HG0107430	MYB-related	TF
HORVU.MOREX.r3.2HG0107710	Pseudo ARR-B	TR
HORVU.MOREX.r3.2HG0107860	FAR1	TF
HORVU.MOREX.r3.2HG0108170	B3	TF
HORVU.MOREX.r3.2HG0108430	C2H2	TF
HORVU.MOREX.r3.2HG0108550	HSF	TF
HORVU.MOREX.r3.2HG0108640	SNF2	TR
HORVU.MOREX.r3.2HG0108840	C2H2	TF
HORVU.MOREX.r3.2HG0109080	FAR1	TF
HORVU.MOREX.r3.2HG0109270	B3	TF
HORVU.MOREX.r3.2HG0109660	PHD	TR
HORVU.MOREX.r3.2HG0109720	PHD	TR
HORVU.MOREX.r3.2HG0109890	FAR1	TF
HORVU.MOREX.r3.2HG0110190	GRAS	TF
HORVU.MOREX.r3.2HG0110490	MYB	TF
HORVU.MOREX.r3.2HG0110640	bZIP	TF
HORVU.MOREX.r3.2HG0111000	bZIP	TF
HORVU.MOREX.r3.2HG0111100	EIL	TF
HORVU.MOREX.r3.2HG0111250	GARP-G2-like	TF
HORVU.MOREX.r3.2HG0111270	HB-WOX	TF
HORVU.MOREX.r3.2HG0111280	C2C2-Dof	TF
HORVU.MOREX.r3.2HG0111350	NAC	TF
HORVU.MOREX.r3.2HG0111370	NAC	TF
HORVU.MOREX.r3.2HG0111380	NAC	TF
HORVU.MOREX.r3.2HG0111410	NAC	TF
HORVU.MOREX.r3.2HG0111480	NAC	TF
HORVU.MOREX.r3.2HG0111500	NAC	TF
HORVU.MOREX.r3.2HG0111890	WRKY	TF
HORVU.MOREX.r3.2HG0111920	WRKY	TF
HORVU.MOREX.r3.2HG0111960	WRKY	TF
HORVU.MOREX.r3.2HG0112030	B3	TF
HORVU.MOREX.r3.2HG0112060	bZIP	TF
HORVU.MOREX.r3.2HG0112160	OFP	TF
HORVU.MOREX.r3.2HG0112960	AP2/ERF-ERF	TF
HORVU.MOREX.r3.2HG0113340	AP2/ERF-ERF	TF
HORVU.MOREX.r3.2HG0114150	GARP-G2-like	TF
HORVU.MOREX.r3.2HG0114260	AP2/ERF-ERF	TF
HORVU.MOREX.r3.2HG0114450	C3H	TF
HORVU.MOREX.r3.2HG0114460	C3H	TF
HORVU.MOREX.r3.2HG0115000	Others	TR
HORVU.MOREX.r3.2HG0115210	bHLH	TF
HORVU.MOREX.r3.2HG0115240	TUB	TF
HORVU.MOREX.r3.2HG0115480	CPP	TF
HORVU.MOREX.r3.2HG0116070	HB-other	TF
HORVU.MOREX.r3.2HG0116410	DDT	TR
HORVU.MOREX.r3.2HG0116700	SNF2	TR
HORVU.MOREX.r3.2HG0118320	mTERF	TR
HORVU.MOREX.r3.2HG0119190	bZIP	TF
HORVU.MOREX.r3.2HG0119430	FAR1	TF
HORVU.MOREX.r3.2HG0119460	B3	TF
HORVU.MOREX.r3.2HG0119560	CSD	TF
HORVU.MOREX.r3.2HG0119580	CSD	TF
HORVU.MOREX.r3.2HG0119590	CSD	TF
HORVU.MOREX.r3.2HG0119600	IWS1	TR
HORVU.MOREX.r3.2HG0119710	SNF2	TR
HORVU.MOREX.r3.2HG0119930	MADS-M-type	TF
HORVU.MOREX.r3.2HG0119950	MADS-M-type	TF
HORVU.MOREX.r3.2HG0119970	HSF	TF
HORVU.MOREX.r3.2HG0121290	SNF2	TR
HORVU.MOREX.r3.2HG0121310	GeBP	TF
HORVU.MOREX.r3.2HG0121480	MYB	TF
HORVU.MOREX.r3.2HG0121500	Others	TR
HORVU.MOREX.r3.2HG0121510	C2H2	TF
HORVU.MOREX.r3.2HG0121530	B3	TF
HORVU.MOREX.r3.2HG0122400	MYB	TF
HORVU.MOREX.r3.2HG0122660	MYB	TF
HORVU.MOREX.r3.2HG0123020	B3	TF
HORVU.MOREX.r3.2HG0123050	B3	TF
HORVU.MOREX.r3.2HG0123480	WRKY	TF
HORVU.MOREX.r3.2HG0123790	CAMTA	TF
HORVU.MOREX.r3.2HG0125050	FAR1	TF
HORVU.MOREX.r3.2HG0125070	B3	TF
HORVU.MOREX.r3.2HG0125240	C2H2	TF
HORVU.MOREX.r3.2HG0125430	Tify	TF
HORVU.MOREX.r3.2HG0126090	Alfin-like	TF
HORVU.MOREX.r3.2HG0126220	NF-YA	TF
HORVU.MOREX.r3.2HG0126240	B3	TF
HORVU.MOREX.r3.2HG0126410	NF-YB	TF
HORVU.MOREX.r3.2HG0127410	MADS-MIKC	TF
HORVU.MOREX.r3.2HG0127960	B3	TF
HORVU.MOREX.r3.2HG0128020	AP2/ERF-ERF	TF
HORVU.MOREX.r3.2HG0128270	C2H2	TF
HORVU.MOREX.r3.2HG0128410	SNF2	TR
HORVU.MOREX.r3.2HG0128530	SNF2	TR
HORVU.MOREX.r3.2HG0128680	WRKY	TF
HORVU.MOREX.r3.2HG0129320	FAR1	TF
HORVU.MOREX.r3.2HG0129370	GRAS	TF
HORVU.MOREX.r3.2HG0129400	LOB	TF
HORVU.MOREX.r3.2HG0129450	bHLH	TF
HORVU.MOREX.r3.2HG0129490	C2H2	TF
HORVU.MOREX.r3.2HG0130000	HRT	TF
HORVU.MOREX.r3.2HG0130150	GRAS	TF
HORVU.MOREX.r3.2HG0130450	GNAT	TR
HORVU.MOREX.r3.2HG0130890	WRKY	TF
HORVU.MOREX.r3.2HG0130900	GRAS	TF
HORVU.MOREX.r3.2HG0131040	mTERF	TR
HORVU.MOREX.r3.2HG0131280	HB-other	TF
HORVU.MOREX.r3.2HG0131300	C2H2	TF
HORVU.MOREX.r3.2HG0131380	BES1	TF
HORVU.MOREX.r3.2HG0132000	SNF2	TR
HORVU.MOREX.r3.2HG0132160	AP2/ERF-ERF	TF
HORVU.MOREX.r3.2HG0132190	SNF2	TR
HORVU.MOREX.r3.2HG0132870	C2C2-YABBY	TF
HORVU.MOREX.r3.2HG0133360	C2H2	TF
HORVU.MOREX.r3.2HG0133650	C3H	TF
HORVU.MOREX.r3.2HG0133890	GRAS	TF
HORVU.MOREX.r3.2HG0134090	NAC	TF
HORVU.MOREX.r3.2HG0134820	FAR1	TF
HORVU.MOREX.r3.2HG0134870	B3	TF
HORVU.MOREX.r3.2HG0134940	HSF	TF
HORVU.MOREX.r3.2HG0135140	GRAS	TF
HORVU.MOREX.r3.2HG0135680	MYB	TF
HORVU.MOREX.r3.2HG0136970	bHLH	TF
HORVU.MOREX.r3.2HG0137380	HSF	TF
HORVU.MOREX.r3.2HG0138250	GRAS	TF
HORVU.MOREX.r3.2HG0138530	bHLH	TF
HORVU.MOREX.r3.2HG0139210	FAR1	TF
HORVU.MOREX.r3.2HG0139640	B3	TF
HORVU.MOREX.r3.2HG0139900	NAC	TF
HORVU.MOREX.r3.2HG0141740	SNF2	TR
HORVU.MOREX.r3.2HG0142300	C2C2-Dof	TF
HORVU.MOREX.r3.2HG0142950	SBP	TF
HORVU.MOREX.r3.2HG0143700	PHD	TR
HORVU.MOREX.r3.2HG0144280	AP2/ERF-ERF	TF
HORVU.MOREX.r3.2HG0144830	FAR1	TF
HORVU.MOREX.r3.2HG0144990	MYB	TF
HORVU.MOREX.r3.2HG0145410	FAR1	TF
HORVU.MOREX.r3.2HG0145580	CAMTA	TF
HORVU.MOREX.r3.2HG0145640	DDT	TR
HORVU.MOREX.r3.2HG0145730	PHD	TR
HORVU.MOREX.r3.2HG0146580	Alfin-like	TF
HORVU.MOREX.r3.2HG0146930	SET	TR
HORVU.MOREX.r3.2HG0147280	PHD	TR
HORVU.MOREX.r3.2HG0147590	PHD	TR
HORVU.MOREX.r3.2HG0147770	GRF	TF
HORVU.MOREX.r3.2HG0148280	bZIP	TF
HORVU.MOREX.r3.2HG0149300	C2H2	TF
HORVU.MOREX.r3.2HG0150590	AP2/ERF-ERF	TF
HORVU.MOREX.r3.2HG0151050	ARID	TR
HORVU.MOREX.r3.2HG0152290	C2H2	TF
HORVU.MOREX.r3.2HG0152890	TCP	TF
HORVU.MOREX.r3.2HG0153620	HSF	TF
HORVU.MOREX.r3.2HG0153790	bHLH	TF
HORVU.MOREX.r3.2HG0154120	mTERF	TR
HORVU.MOREX.r3.2HG0154270	HB-KNOX	TF
HORVU.MOREX.r3.2HG0154350	AP2/ERF-AP2	TF
HORVU.MOREX.r3.2HG0155540	GARP-G2-like	TF
HORVU.MOREX.r3.2HG0156580	FAR1	TF
HORVU.MOREX.r3.2HG0156590	Others	TR
HORVU.MOREX.r3.2HG0156680	WRKY	TF
HORVU.MOREX.r3.2HG0156870	MADS-MIKC	TF
HORVU.MOREX.r3.2HG0156880	B3	TF
HORVU.MOREX.r3.2HG0158000	C2H2	TF
HORVU.MOREX.r3.2HG0158690	WRKY	TF
HORVU.MOREX.r3.2HG0158740	bHLH	TF
HORVU.MOREX.r3.2HG0158950	bHLH	TF
HORVU.MOREX.r3.2HG0159010	LOB	TF
HORVU.MOREX.r3.2HG0159040	bHLH	TF
HORVU.MOREX.r3.2HG0160010	Others	TR
HORVU.MOREX.r3.2HG0160020	Others	TR
HORVU.MOREX.r3.2HG0160050	Others	TR
HORVU.MOREX.r3.2HG0160120	LOB	TF
HORVU.MOREX.r3.2HG0160130	bHLH	TF
HORVU.MOREX.r3.2HG0161630	bHLH	TF
HORVU.MOREX.r3.2HG0161670	SWI/SNF-BAF60b	TR
HORVU.MOREX.r3.2HG0162660	B3	TF
HORVU.MOREX.r3.2HG0162910	CAMTA	TF
HORVU.MOREX.r3.2HG0163880	Tify	TF
HORVU.MOREX.r3.2HG0164160	Trihelix	TF
HORVU.MOREX.r3.2HG0164340	AP2/ERF-ERF	TF
HORVU.MOREX.r3.2HG0164540	AP2/ERF-ERF	TF
HORVU.MOREX.r3.2HG0165050	B3	TF
HORVU.MOREX.r3.2HG0165080	PHD	TR
HORVU.MOREX.r3.2HG0165360	Trihelix	TF
HORVU.MOREX.r3.2HG0165540	B3	TF
HORVU.MOREX.r3.2HG0165740	S1Fa-like	TF
HORVU.MOREX.r3.2HG0165970	B3	TF
HORVU.MOREX.r3.2HG0165980	B3	TF
HORVU.MOREX.r3.2HG0166060	B3	TF
HORVU.MOREX.r3.2HG0166570	bHLH	TF
HORVU.MOREX.r3.2HG0166800	OFP	TF
HORVU.MOREX.r3.2HG0166980	B3	TF
HORVU.MOREX.r3.2HG0167030	Others	TR
HORVU.MOREX.r3.2HG0167210	E2F-DP	TF
HORVU.MOREX.r3.2HG0168100	SET	TR
HORVU.MOREX.r3.2HG0168260	SET	TR
HORVU.MOREX.r3.2HG0168770	GRAS	TF
HORVU.MOREX.r3.2HG0169150	zf-HD	TF
HORVU.MOREX.r3.2HG0169570	NAC	TF
HORVU.MOREX.r3.2HG0169720	C3H	TF
HORVU.MOREX.r3.2HG0169970	DDT	TR
HORVU.MOREX.r3.2HG0170170	B3-ARF	TF
HORVU.MOREX.r3.2HG0170250	Others	TR
HORVU.MOREX.r3.2HG0170300	FAR1	TF
HORVU.MOREX.r3.2HG0170460	AP2/ERF-ERF	TF
HORVU.MOREX.r3.2HG0170570	MADS-MIKC	TF
HORVU.MOREX.r3.2HG0170610	NAC	TF
HORVU.MOREX.r3.2HG0170820	C2H2	TF
HORVU.MOREX.r3.2HG0170910	PHD	TR
HORVU.MOREX.r3.2HG0171130	Trihelix	TF
HORVU.MOREX.r3.2HG0171780	OFP	TF
HORVU.MOREX.r3.2HG0172420	C2H2	TF
HORVU.MOREX.r3.2HG0172880	EIL	TF
HORVU.MOREX.r3.2HG0173400	NAC	TF
HORVU.MOREX.r3.2HG0173410	MYB	TF
HORVU.MOREX.r3.2HG0173440	MADS-MIKC	TF
HORVU.MOREX.r3.2HG0173890	C2H2	TF
HORVU.MOREX.r3.2HG0174000	GNAT	TR
HORVU.MOREX.r3.2HG0174600	MYB	TF
HORVU.MOREX.r3.2HG0174630	C2H2	TF
HORVU.MOREX.r3.2HG0174700	WRKY	TF
HORVU.MOREX.r3.2HG0175090	NAC	TF
HORVU.MOREX.r3.2HG0175100	NAC	TF
HORVU.MOREX.r3.2HG0175110	NAC	TF
HORVU.MOREX.r3.2HG0175130	NAC	TF
HORVU.MOREX.r3.2HG0175320	FAR1	TF
HORVU.MOREX.r3.2HG0175540	NAC	TF
HORVU.MOREX.r3.2HG0175550	NAC	TF
HORVU.MOREX.r3.2HG0175560	NAC	TF
HORVU.MOREX.r3.2HG0176200	TAZ	TR
HORVU.MOREX.r3.2HG0176250	TAZ	TR
HORVU.MOREX.r3.2HG0176660	GNAT	TR
HORVU.MOREX.r3.2HG0176860	Trihelix	TF
HORVU.MOREX.r3.2HG0177070	FAR1	TF
HORVU.MOREX.r3.2HG0177240	FAR1	TF
HORVU.MOREX.r3.2HG0177640	DBB	TF
HORVU.MOREX.r3.2HG0178050	Jumonji	TR
HORVU.MOREX.r3.2HG0178240	bZIP	TF
HORVU.MOREX.r3.2HG0178290	RWP-RK	TF
HORVU.MOREX.r3.2HG0178580	C2C2-CO-like	TF
HORVU.MOREX.r3.2HG0179830	FAR1	TF
HORVU.MOREX.r3.2HG0179900	NAC	TF
HORVU.MOREX.r3.2HG0179910	NAC	TF
HORVU.MOREX.r3.2HG0179920	AP2/ERF-AP2	TF
HORVU.MOREX.r3.2HG0180020	NF-YB	TF
HORVU.MOREX.r3.2HG0180510	NAC	TF
HORVU.MOREX.r3.2HG0180530	MYB	TF
HORVU.MOREX.r3.2HG0180830	TRAF	TR
HORVU.MOREX.r3.2HG0180890	TRAF	TR
HORVU.MOREX.r3.2HG0181770	NAC	TF
HORVU.MOREX.r3.2HG0181840	MYB	TF
HORVU.MOREX.r3.2HG0182280	B3-ARF	TF
HORVU.MOREX.r3.2HG0182740	Others	TR
HORVU.MOREX.r3.2HG0183310	TCP	TF
HORVU.MOREX.r3.2HG0183670	AP2/ERF-ERF	TF
HORVU.MOREX.r3.2HG0184070	LIM	TF
HORVU.MOREX.r3.2HG0184080	MYB	TF
HORVU.MOREX.r3.2HG0184130	MYB	TF
HORVU.MOREX.r3.2HG0184160	MYB	TF
HORVU.MOREX.r3.2HG0184370	SNF2	TR
HORVU.MOREX.r3.2HG0184460	C2C2-YABBY	TF
HORVU.MOREX.r3.2HG0184480	NAC	TF
HORVU.MOREX.r3.2HG0184740	HB-other	TF
HORVU.MOREX.r3.2HG0184840	C2C2-GATA	TF
HORVU.MOREX.r3.2HG0184930	DBB	TF
HORVU.MOREX.r3.2HG0185030	MBF1	TR
HORVU.MOREX.r3.2HG0185070	Trihelix	TF
HORVU.MOREX.r3.2HG0185100	HB-HD-ZIP	TF
HORVU.MOREX.r3.2HG0185150	FAR1	TF
HORVU.MOREX.r3.2HG0185400	SET	TR
HORVU.MOREX.r3.2HG0185510	C2C2-GATA	TF
HORVU.MOREX.r3.2HG0185550	WRKY	TF
HORVU.MOREX.r3.2HG0185570	OFP	TF
HORVU.MOREX.r3.2HG0185830	AP2/ERF-ERF	TF
HORVU.MOREX.r3.2HG0186060	B3	TF
HORVU.MOREX.r3.2HG0186240	GRAS	TF
HORVU.MOREX.r3.2HG0186500	OFP	TF
HORVU.MOREX.r3.2HG0186750	GRF	TF
HORVU.MOREX.r3.2HG0187000	AP2/ERF-ERF	TF
HORVU.MOREX.r3.2HG0187010	AP2/ERF-ERF	TF
HORVU.MOREX.r3.2HG0187460	HB-HD-ZIP	TF
HORVU.MOREX.r3.2HG0187550	HSF	TF
HORVU.MOREX.r3.2HG0187570	C2C2-Dof	TF
HORVU.MOREX.r3.2HG0187690	GARP-G2-like	TF
HORVU.MOREX.r3.2HG0187780	C2H2	TF
HORVU.MOREX.r3.2HG0187800	SNF2	TR
HORVU.MOREX.r3.2HG0187890	HMG	TR
HORVU.MOREX.r3.2HG0187910	RWP-RK	TF
HORVU.MOREX.r3.2HG0187920	RWP-RK	TF
HORVU.MOREX.r3.2HG0188220	SWI/SNF-SWI3	TR
HORVU.MOREX.r3.2HG0188710	bHLH	TF
HORVU.MOREX.r3.2HG0188770	NAC	TF
HORVU.MOREX.r3.2HG0188900	mTERF	TR
HORVU.MOREX.r3.2HG0189400	C2H2	TF
HORVU.MOREX.r3.2HG0189430	C2H2	TF
HORVU.MOREX.r3.2HG0189580	SBP	TF
HORVU.MOREX.r3.2HG0189780	AP2/ERF-ERF	TF
HORVU.MOREX.r3.2HG0189790	AP2/ERF-ERF	TF
HORVU.MOREX.r3.2HG0189800	AP2/ERF-ERF	TF
HORVU.MOREX.r3.2HG0189810	MYB	TF
HORVU.MOREX.r3.2HG0189890	HB-HD-ZIP	TF
HORVU.MOREX.r3.2HG0190070	AP2/ERF-ERF	TF
HORVU.MOREX.r3.2HG0190100	AP2/ERF-ERF	TF
HORVU.MOREX.r3.2HG0190320	C2H2	TF
HORVU.MOREX.r3.2HG0190330	Others	TR
HORVU.MOREX.r3.2HG0190430	FAR1	TF
HORVU.MOREX.r3.2HG0190700	MADS-MIKC	TF
HORVU.MOREX.r3.2HG0191110	Rcd1-like	TR
HORVU.MOREX.r3.2HG0191770	AP2/ERF-ERF	TF
HORVU.MOREX.r3.2HG0191950	PHD	TR
HORVU.MOREX.r3.2HG0192790	FAR1	TF
HORVU.MOREX.r3.2HG0192820	SNF2	TR
HORVU.MOREX.r3.2HG0192860	WRKY	TF
HORVU.MOREX.r3.2HG0193210	Trihelix	TF
HORVU.MOREX.r3.2HG0193490	GRF	TF
HORVU.MOREX.r3.2HG0193750	GARP-G2-like	TF
HORVU.MOREX.r3.2HG0193920	B3	TF
HORVU.MOREX.r3.2HG0194180	bHLH	TF
HORVU.MOREX.r3.2HG0194240	LFY	TF
HORVU.MOREX.r3.2HG0194370	WRKY	TF
HORVU.MOREX.r3.2HG0194440	AP2/ERF-ERF	TF
HORVU.MOREX.r3.2HG0194580	HMG	TR
HORVU.MOREX.r3.2HG0194820	bZIP	TF
HORVU.MOREX.r3.2HG0195150	AP2/ERF-ERF	TF
HORVU.MOREX.r3.2HG0195390	NAC	TF
HORVU.MOREX.r3.2HG0195460	bHLH	TF
HORVU.MOREX.r3.2HG0195520	B3	TF
HORVU.MOREX.r3.2HG0195730	MADS-M-type	TF
HORVU.MOREX.r3.2HG0196010	SET	TR
HORVU.MOREX.r3.2HG0196050	MYB-related	TF
HORVU.MOREX.r3.2HG0197140	bHLH	TF
HORVU.MOREX.r3.2HG0197200	PLATZ	TF
HORVU.MOREX.r3.2HG0197300	MYB	TF
HORVU.MOREX.r3.2HG0197310	MYB	TF
HORVU.MOREX.r3.2HG0197320	MYB	TF
HORVU.MOREX.r3.2HG0197540	MYB	TF
HORVU.MOREX.r3.2HG0197810	TRAF	TR
HORVU.MOREX.r3.2HG0197910	bHLH	TF
HORVU.MOREX.r3.2HG0197920	TRAF	TR
HORVU.MOREX.r3.2HG0197950	TRAF	TR
HORVU.MOREX.r3.2HG0198150	HB-HD-ZIP	TF
HORVU.MOREX.r3.2HG0198250	B3	TF
HORVU.MOREX.r3.2HG0198290	B3	TF
HORVU.MOREX.r3.2HG0198300	B3	TF
HORVU.MOREX.r3.2HG0198730	SET	TR
HORVU.MOREX.r3.2HG0199050	SET	TR
HORVU.MOREX.r3.2HG0199060	SNF2	TR
HORVU.MOREX.r3.2HG0199460	MYB-related	TF
HORVU.MOREX.r3.2HG0200070	FAR1	TF
HORVU.MOREX.r3.2HG0200130	FAR1	TF
HORVU.MOREX.r3.2HG0200170	C2H2	TF
HORVU.MOREX.r3.2HG0200290	C3H	TF
HORVU.MOREX.r3.2HG0200310	GARP-G2-like	TF
HORVU.MOREX.r3.2HG0200320	SWI/SNF-BAF60b	TR
HORVU.MOREX.r3.2HG0200360	FAR1	TF
HORVU.MOREX.r3.2HG0200560	WRKY	TF
HORVU.MOREX.r3.2HG0200970	B3-ARF	TF
HORVU.MOREX.r3.2HG0201080	HB-WOX	TF
HORVU.MOREX.r3.2HG0201120	C3H	TF
HORVU.MOREX.r3.2HG0201350	AP2/ERF-ERF	TF
HORVU.MOREX.r3.2HG0201570	PHD	TR
HORVU.MOREX.r3.2HG0201700	bZIP	TF
HORVU.MOREX.r3.2HG0201750	FAR1	TF
HORVU.MOREX.r3.2HG0201880	WRKY	TF
HORVU.MOREX.r3.2HG0202310	TRAF	TR
HORVU.MOREX.r3.2HG0202440	AP2/ERF-ERF	TF
HORVU.MOREX.r3.2HG0202650	SBP	TF
HORVU.MOREX.r3.2HG0202730	AP2/ERF-ERF	TF
HORVU.MOREX.r3.2HG0203350	AP2/ERF-AP2	TF
HORVU.MOREX.r3.2HG0203390	AUX/IAA	TR
HORVU.MOREX.r3.2HG0203510	Tify	TF
HORVU.MOREX.r3.2HG0203670	MYB	TF
HORVU.MOREX.r3.2HG0203690	B3	TF
HORVU.MOREX.r3.2HG0203960	TRAF	TR
HORVU.MOREX.r3.2HG0204060	AP2/ERF-ERF	TF
HORVU.MOREX.r3.2HG0204420	GRAS	TF
HORVU.MOREX.r3.2HG0204530	GRAS	TF
HORVU.MOREX.r3.2HG0204730	HB-WOX	TF
HORVU.MOREX.r3.2HG0204770	AP2/ERF-AP2	TF
HORVU.MOREX.r3.2HG0204820	AP2/ERF-ERF	TF
HORVU.MOREX.r3.2HG0204990	bHLH	TF
HORVU.MOREX.r3.2HG0205970	bHLH	TF
HORVU.MOREX.r3.2HG0206640	MADS-M-type	TF
HORVU.MOREX.r3.2HG0206660	MADS-M-type	TF
HORVU.MOREX.r3.2HG0206900	B3	TF
HORVU.MOREX.r3.2HG0206910	mTERF	TR
HORVU.MOREX.r3.2HG0206960	bZIP	TF
HORVU.MOREX.r3.2HG0207400	GNAT	TR
HORVU.MOREX.r3.2HG0207460	FAR1	TF
HORVU.MOREX.r3.2HG0207910	bZIP	TF
HORVU.MOREX.r3.2HG0208230	B3	TF
HORVU.MOREX.r3.2HG0208630	B3	TF
HORVU.MOREX.r3.2HG0209510	C2C2-Dof	TF
HORVU.MOREX.r3.2HG0209540	C2C2-Dof	TF
HORVU.MOREX.r3.2HG0209560	C2C2-Dof	TF
HORVU.MOREX.r3.2HG0209580	TRAF	TR
HORVU.MOREX.r3.2HG0209830	AUX/IAA	TR
HORVU.MOREX.r3.2HG0210040	MYB-related	TF
HORVU.MOREX.r3.2HG0210050	B3	TF
HORVU.MOREX.r3.2HG0210600	AP2/ERF-ERF	TF
HORVU.MOREX.r3.2HG0210870	MYB	TF
HORVU.MOREX.r3.2HG0211040	Others	TR
HORVU.MOREX.r3.2HG0211480	AP2/ERF-ERF	TF
HORVU.MOREX.r3.2HG0211550	AP2/ERF-ERF	TF
HORVU.MOREX.r3.2HG0211740	C3H	TF
HORVU.MOREX.r3.2HG0211750	B3-ARF	TF
HORVU.MOREX.r3.2HG0213040	AP2/ERF-ERF	TF
HORVU.MOREX.r3.2HG0213810	AP2/ERF-ERF	TF
HORVU.MOREX.r3.2HG0213840	OFP	TF
HORVU.MOREX.r3.2HG0214060	B3	TF
HORVU.MOREX.r3.2HG0215220	TUB	TF
HORVU.MOREX.r3.2HG0215900	C2H2	TF
HORVU.MOREX.r3.2HG0216230	B3-ARF	TF
HORVU.MOREX.r3.2HG0216560	NAC	TF
HORVU.MOREX.r3.2HG0216570	NAC	TF
HORVU.MOREX.r3.2HG0217200	B3	TF
HORVU.MOREX.r3.2HG0217760	C2C2-GATA	TF
HORVU.MOREX.r3.2HG0217790	SNF2	TR
HORVU.MOREX.r3.2HG0217930	NAC	TF
HORVU.MOREX.r3.2HG0218020	SET	TR
HORVU.MOREX.r3.3HG0218140	bHLH	TF
HORVU.MOREX.r3.3HG0218150	bHLH	TF
HORVU.MOREX.r3.3HG0218180	bHLH	TF
HORVU.MOREX.r3.3HG0218190	bHLH	TF
HORVU.MOREX.r3.3HG0218220	bHLH	TF
HORVU.MOREX.r3.3HG0218240	HB-HD-ZIP	TF
HORVU.MOREX.r3.3HG0218500	FAR1	TF
HORVU.MOREX.r3.3HG0218640	Others	TR
HORVU.MOREX.r3.3HG0218740	Others	TR
HORVU.MOREX.r3.3HG0219210	bHLH	TF
HORVU.MOREX.r3.3HG0219660	TRAF	TR
HORVU.MOREX.r3.3HG0221050	TRAF	TR
HORVU.MOREX.r3.3HG0221590	AP2/ERF-ERF	TF
HORVU.MOREX.r3.3HG0221630	AP2/ERF-ERF	TF
HORVU.MOREX.r3.3HG0222330	MYB	TF
HORVU.MOREX.r3.3HG0222600	MYB-related	TF
HORVU.MOREX.r3.3HG0222790	AP2/ERF-ERF	TF
HORVU.MOREX.r3.3HG0223460	WRKY	TF
HORVU.MOREX.r3.3HG0223580	FAR1	TF
HORVU.MOREX.r3.3HG0224000	bHLH	TF
HORVU.MOREX.r3.3HG0225780	GeBP	TF
HORVU.MOREX.r3.3HG0227270	Others	TR
HORVU.MOREX.r3.3HG0227280	C2H2	TF
HORVU.MOREX.r3.3HG0227760	AP2/ERF-RAV	TF
HORVU.MOREX.r3.3HG0227780	AP2/ERF-RAV	TF
HORVU.MOREX.r3.3HG0227830	AP2/ERF-RAV	TF
HORVU.MOREX.r3.3HG0227850	AP2/ERF-RAV	TF
HORVU.MOREX.r3.3HG0228120	MYB-related	TF
HORVU.MOREX.r3.3HG0228140	MYB-related	TF
HORVU.MOREX.r3.3HG0228520	FAR1	TF
HORVU.MOREX.r3.3HG0228950	AP2/ERF-ERF	TF
HORVU.MOREX.r3.3HG0229710	GRAS	TF
HORVU.MOREX.r3.3HG0229750	GRAS	TF
HORVU.MOREX.r3.3HG0230070	SNF2	TR
HORVU.MOREX.r3.3HG0230160	IWS1	TR
HORVU.MOREX.r3.3HG0230530	mTERF	TR
HORVU.MOREX.r3.3HG0230550	HB-WOX	TF
HORVU.MOREX.r3.3HG0230650	LOB	TF
HORVU.MOREX.r3.3HG0231070	TRAF	TR
HORVU.MOREX.r3.3HG0231360	NAC	TF
HORVU.MOREX.r3.3HG0231380	NAC	TF
HORVU.MOREX.r3.3HG0231420	NAC	TF
HORVU.MOREX.r3.3HG0231630	DDT	TR
HORVU.MOREX.r3.3HG0231890	SNF2	TR
HORVU.MOREX.r3.3HG0233340	B3	TF
HORVU.MOREX.r3.3HG0233680	LOB	TF
HORVU.MOREX.r3.3HG0233930	LOB	TF
HORVU.MOREX.r3.3HG0233970	C2H2	TF
HORVU.MOREX.r3.3HG0234110	MYB	TF
HORVU.MOREX.r3.3HG0234980	B3	TF
HORVU.MOREX.r3.3HG0235030	AP2/ERF-ERF	TF
HORVU.MOREX.r3.3HG0235850	bHLH	TF
HORVU.MOREX.r3.3HG0236050	bHLH	TF
HORVU.MOREX.r3.3HG0236170	C2H2	TF
HORVU.MOREX.r3.3HG0236240	TRAF	TR
HORVU.MOREX.r3.3HG0236270	GARP-G2-like	TF
HORVU.MOREX.r3.3HG0236320	MYB-related	TF
HORVU.MOREX.r3.3HG0236430	C2C2-Dof	TF
HORVU.MOREX.r3.3HG0236520	MYB-related	TF
HORVU.MOREX.r3.3HG0236540	C3H	TF
HORVU.MOREX.r3.3HG0236590	NAC	TF
HORVU.MOREX.r3.3HG0236690	MYB	TF
HORVU.MOREX.r3.3HG0236780	AUX/IAA	TR
HORVU.MOREX.r3.3HG0236900	MYB-related	TF
HORVU.MOREX.r3.3HG0237200	WRKY	TF
HORVU.MOREX.r3.3HG0237210	B3	TF
HORVU.MOREX.r3.3HG0237320	FAR1	TF
HORVU.MOREX.r3.3HG0237360	WRKY	TF
HORVU.MOREX.r3.3HG0237480	HMG	TR
HORVU.MOREX.r3.3HG0237550	HB-other	TF
HORVU.MOREX.r3.3HG0237650	C2H2	TF
HORVU.MOREX.r3.3HG0237870	PHD	TR
HORVU.MOREX.r3.3HG0237950	NF-YC	TF
HORVU.MOREX.r3.3HG0238050	C2H2	TF
HORVU.MOREX.r3.3HG0238240	WRKY	TF
HORVU.MOREX.r3.3HG0238260	Trihelix	TF
HORVU.MOREX.r3.3HG0239330	HB-other	TF
HORVU.MOREX.r3.3HG0239420	HB-other	TF
HORVU.MOREX.r3.3HG0239900	AUX/IAA	TR
HORVU.MOREX.r3.3HG0240220	LUG	TR
HORVU.MOREX.r3.3HG0240300	BES1	TF
HORVU.MOREX.r3.3HG0240350	GARP-G2-like	TF
HORVU.MOREX.r3.3HG0241120	B3	TF
HORVU.MOREX.r3.3HG0241300	C3H	TF
HORVU.MOREX.r3.3HG0241310	C3H	TF
HORVU.MOREX.r3.3HG0241340	TRAF	TR
HORVU.MOREX.r3.3HG0241370	bZIP	TF
HORVU.MOREX.r3.3HG0241790	mTERF	TR
HORVU.MOREX.r3.3HG0242130	MYB	TF
HORVU.MOREX.r3.3HG0242950	NF-X1	TF
HORVU.MOREX.r3.3HG0243300	MADS-M-type	TF
HORVU.MOREX.r3.3HG0243360	FAR1	TF
HORVU.MOREX.r3.3HG0243560	BES1	TF
HORVU.MOREX.r3.3HG0243610	Others	TR
HORVU.MOREX.r3.3HG0243770	MADS-MIKC	TF
HORVU.MOREX.r3.3HG0243900	AP2/ERF-ERF	TF
HORVU.MOREX.r3.3HG0244040	AP2/ERF-ERF	TF
HORVU.MOREX.r3.3HG0244080	HB-HD-ZIP	TF
HORVU.MOREX.r3.3HG0244110	MADS-M-type	TF
HORVU.MOREX.r3.3HG0244900	PHD	TR
HORVU.MOREX.r3.3HG0244970	bHLH	TF
HORVU.MOREX.r3.3HG0245560	TCP	TF
HORVU.MOREX.r3.3HG0245960	bZIP	TF
HORVU.MOREX.r3.3HG0246560	MBF1	TR
HORVU.MOREX.r3.3HG0246830	B3	TF
HORVU.MOREX.r3.3HG0247610	AP2/ERF-ERF	TF
HORVU.MOREX.r3.3HG0247960	FAR1	TF
HORVU.MOREX.r3.3HG0248230	C2H2	TF
HORVU.MOREX.r3.3HG0248370	OFP	TF
HORVU.MOREX.r3.3HG0248740	MYB	TF
HORVU.MOREX.r3.3HG0248770	FAR1	TF
HORVU.MOREX.r3.3HG0248790	FAR1	TF
HORVU.MOREX.r3.3HG0249060	AUX/IAA	TR
HORVU.MOREX.r3.3HG0249810	bHLH	TF
HORVU.MOREX.r3.3HG0249890	B3-ARF	TF
HORVU.MOREX.r3.3HG0249960	RWP-RK	TF
HORVU.MOREX.r3.3HG0250220	GARP-G2-like	TF
HORVU.MOREX.r3.3HG0250560	NAC	TF
HORVU.MOREX.r3.3HG0251180	C2H2	TF
HORVU.MOREX.r3.3HG0251290	LOB	TF
HORVU.MOREX.r3.3HG0251770	mTERF	TR
HORVU.MOREX.r3.3HG0251830	RWP-RK	TF
HORVU.MOREX.r3.3HG0251900	WRKY	TF
HORVU.MOREX.r3.3HG0251990	B3	TF
HORVU.MOREX.r3.3HG0252030	FAR1	TF
HORVU.MOREX.r3.3HG0252380	GeBP	TF
HORVU.MOREX.r3.3HG0252620	C3H	TF
HORVU.MOREX.r3.3HG0252670	Others	TR
HORVU.MOREX.r3.3HG0252680	Others	TR
HORVU.MOREX.r3.3HG0252690	Others	TR
HORVU.MOREX.r3.3HG0252710	bHLH	TF
HORVU.MOREX.r3.3HG0252730	Others	TR
HORVU.MOREX.r3.3HG0252800	FAR1	TF
HORVU.MOREX.r3.3HG0253990	C3H	TF
HORVU.MOREX.r3.3HG0254020	C3H	TF
HORVU.MOREX.r3.3HG0254070	GeBP	TF
HORVU.MOREX.r3.3HG0254270	FAR1	TF
HORVU.MOREX.r3.3HG0254600	NAC	TF
HORVU.MOREX.r3.3HG0255050	C2C2-Dof	TF
HORVU.MOREX.r3.3HG0255160	B3	TF
HORVU.MOREX.r3.3HG0255480	FAR1	TF
HORVU.MOREX.r3.3HG0256690	MYB	TF
HORVU.MOREX.r3.3HG0257400	WRKY	TF
HORVU.MOREX.r3.3HG0257450	C2C2-Dof	TF
HORVU.MOREX.r3.3HG0257540	B3	TF
HORVU.MOREX.r3.3HG0258710	C2H2	TF
HORVU.MOREX.r3.3HG0260410	bZIP	TF
HORVU.MOREX.r3.3HG0260780	B3	TF
HORVU.MOREX.r3.3HG0260790	B3	TF
HORVU.MOREX.r3.3HG0263430	C2H2	TF
HORVU.MOREX.r3.3HG0263460	B3	TF
HORVU.MOREX.r3.3HG0263560	PHD	TR
HORVU.MOREX.r3.3HG0264770	bZIP	TF
HORVU.MOREX.r3.3HG0264850	MYB	TF
HORVU.MOREX.r3.3HG0265580	B3	TF
HORVU.MOREX.r3.3HG0265970	B3	TF
HORVU.MOREX.r3.3HG0266110	bHLH	TF
HORVU.MOREX.r3.3HG0266220	C2H2	TF
HORVU.MOREX.r3.3HG0266450	Jumonji	TR
HORVU.MOREX.r3.3HG0267080	C3H	TF
HORVU.MOREX.r3.3HG0267140	C2H2	TF
HORVU.MOREX.r3.3HG0267190	LOB	TF
HORVU.MOREX.r3.3HG0267290	bHLH	TF
HORVU.MOREX.r3.3HG0267620	FAR1	TF
HORVU.MOREX.r3.3HG0268090	WRKY	TF
HORVU.MOREX.r3.3HG0268620	MYB-related	TF
HORVU.MOREX.r3.3HG0269750	C2H2	TF
HORVU.MOREX.r3.3HG0270100	MYB-related	TF
HORVU.MOREX.r3.3HG0270620	LUG	TR
HORVU.MOREX.r3.3HG0270710	LUG	TR
HORVU.MOREX.r3.3HG0270990	GNAT	TR
HORVU.MOREX.r3.3HG0271180	CPP	TF
HORVU.MOREX.r3.3HG0271290	C2C2-LSD	TF
HORVU.MOREX.r3.3HG0271360	C2H2	TF
HORVU.MOREX.r3.3HG0271560	SNF2	TR
HORVU.MOREX.r3.3HG0271710	C3H	TF
HORVU.MOREX.r3.3HG0272300	AP2/ERF-ERF	TF
HORVU.MOREX.r3.3HG0273500	WRKY	TF
HORVU.MOREX.r3.3HG0273590	HSF	TF
HORVU.MOREX.r3.3HG0273610	OFP	TF
HORVU.MOREX.r3.3HG0273660	WRKY	TF
HORVU.MOREX.r3.3HG0274350	zf-HD	TF
HORVU.MOREX.r3.3HG0274520	MYB	TF
HORVU.MOREX.r3.3HG0274620	B3	TF
HORVU.MOREX.r3.3HG0274730	FAR1	TF
HORVU.MOREX.r3.3HG0275220	HB-HD-ZIP	TF
HORVU.MOREX.r3.3HG0275290	B3	TF
HORVU.MOREX.r3.3HG0275490	C3H	TF
HORVU.MOREX.r3.3HG0275650	GRAS	TF
HORVU.MOREX.r3.3HG0276610	PHD	TR
HORVU.MOREX.r3.3HG0276810	WRKY	TF
HORVU.MOREX.r3.3HG0276890	AP2/ERF-ERF	TF
HORVU.MOREX.r3.3HG0277700	C2C2-GATA	TF
HORVU.MOREX.r3.3HG0277710	MYB-related	TF
HORVU.MOREX.r3.3HG0278050	MYB-related	TF
HORVU.MOREX.r3.3HG0278140	WRKY	TF
HORVU.MOREX.r3.3HG0278210	HMG	TR
HORVU.MOREX.r3.3HG0278480	NAC	TF
HORVU.MOREX.r3.3HG0278560	HB-WOX	TF
HORVU.MOREX.r3.3HG0279110	NAC	TF
HORVU.MOREX.r3.3HG0279250	HB-other	TF
HORVU.MOREX.r3.3HG0279380	Trihelix	TF
HORVU.MOREX.r3.3HG0279470	TUB	TF
HORVU.MOREX.r3.3HG0279750	AUX/IAA	TR
HORVU.MOREX.r3.3HG0279760	NAC	TF
HORVU.MOREX.r3.3HG0279920	NAC	TF
HORVU.MOREX.r3.3HG0280050	E2F-DP	TF
HORVU.MOREX.r3.3HG0280840	MYB	TF
HORVU.MOREX.r3.3HG0280940	B3	TF
HORVU.MOREX.r3.3HG0281730	AP2/ERF-RAV	TF
HORVU.MOREX.r3.3HG0281770	MYB-related	TF
HORVU.MOREX.r3.3HG0282130	B3	TF
HORVU.MOREX.r3.3HG0282680	MYB	TF
HORVU.MOREX.r3.3HG0283250	MYB	TF
HORVU.MOREX.r3.3HG0283700	bHLH	TF
HORVU.MOREX.r3.3HG0283710	Coactivator p15	TR
HORVU.MOREX.r3.3HG0283970	MYB-related	TF
HORVU.MOREX.r3.3HG0284070	MYB	TF
HORVU.MOREX.r3.3HG0284730	B3	TF
HORVU.MOREX.r3.3HG0284810	WRKY	TF
HORVU.MOREX.r3.3HG0285160	B3	TF
HORVU.MOREX.r3.3HG0285280	Trihelix	TF
HORVU.MOREX.r3.3HG0285480	PHD	TR
HORVU.MOREX.r3.3HG0285770	MYB	TF
HORVU.MOREX.r3.3HG0285890	B3	TF
HORVU.MOREX.r3.3HG0285930	B3	TF
HORVU.MOREX.r3.3HG0286170	MADS-MIKC	TF
HORVU.MOREX.r3.3HG0286660	WRKY	TF
HORVU.MOREX.r3.3HG0286890	HSF	TF
HORVU.MOREX.r3.3HG0286980	WRKY	TF
HORVU.MOREX.r3.3HG0287760	AUX/IAA	TR
HORVU.MOREX.r3.3HG0288270	C2C2-GATA	TF
HORVU.MOREX.r3.3HG0288670	HB-PHD	TF
HORVU.MOREX.r3.3HG0288860	HSF	TF
HORVU.MOREX.r3.3HG0288900	OFP	TF
HORVU.MOREX.r3.3HG0288940	WRKY	TF
HORVU.MOREX.r3.3HG0289220	AP2/ERF-ERF	TF
HORVU.MOREX.r3.3HG0289300	VOZ	TF
HORVU.MOREX.r3.3HG0289370	B3-ARF	TF
HORVU.MOREX.r3.3HG0289720	bZIP	TF
HORVU.MOREX.r3.3HG0290000	C2C2-Dof	TF
HORVU.MOREX.r3.3HG0290230	B3	TF
HORVU.MOREX.r3.3HG0290300	HB-HD-ZIP	TF
HORVU.MOREX.r3.3HG0290400	Others	TR
HORVU.MOREX.r3.3HG0290510	CPP	TF
HORVU.MOREX.r3.3HG0290700	FAR1	TF
HORVU.MOREX.r3.3HG0290910	TCP	TF
HORVU.MOREX.r3.3HG0291620	TRAF	TR
HORVU.MOREX.r3.3HG0291920	B3	TF
HORVU.MOREX.r3.3HG0292400	SET	TR
HORVU.MOREX.r3.3HG0292410	LOB	TF
HORVU.MOREX.r3.3HG0292810	bHLH	TF
HORVU.MOREX.r3.3HG0293510	SNF2	TR
HORVU.MOREX.r3.3HG0293580	ULT	TF
HORVU.MOREX.r3.3HG0293870	B3	TF
HORVU.MOREX.r3.3HG0294280	C2H2	TF
HORVU.MOREX.r3.3HG0294460	HB-HD-ZIP	TF
HORVU.MOREX.r3.3HG0294880	AP2/ERF-ERF	TF
HORVU.MOREX.r3.3HG0294900	AP2/ERF-ERF	TF
HORVU.MOREX.r3.3HG0295240	bZIP	TF
HORVU.MOREX.r3.3HG0295600	IWS1	TR
HORVU.MOREX.r3.3HG0295690	bZIP	TF
HORVU.MOREX.r3.3HG0296030	SET	TR
HORVU.MOREX.r3.3HG0296060	NAC	TF
HORVU.MOREX.r3.3HG0296070	MYB	TF
HORVU.MOREX.r3.3HG0296180	bZIP	TF
HORVU.MOREX.r3.3HG0296240	AP2/ERF-ERF	TF
HORVU.MOREX.r3.3HG0296630	NAC	TF
HORVU.MOREX.r3.3HG0296860	B3	TF
HORVU.MOREX.r3.3HG0297050	FAR1	TF
HORVU.MOREX.r3.3HG0297270	HB-WOX	TF
HORVU.MOREX.r3.3HG0297450	WRKY	TF
HORVU.MOREX.r3.3HG0297460	B3	TF
HORVU.MOREX.r3.3HG0297470	WRKY	TF
HORVU.MOREX.r3.3HG0297500	WRKY	TF
HORVU.MOREX.r3.3HG0297530	WRKY	TF
HORVU.MOREX.r3.3HG0297540	WRKY	TF
HORVU.MOREX.r3.3HG0297550	WRKY	TF
HORVU.MOREX.r3.3HG0297730	OFP	TF
HORVU.MOREX.r3.3HG0297760	FAR1	TF
HORVU.MOREX.r3.3HG0298010	NAC	TF
HORVU.MOREX.r3.3HG0298130	PHD	TR
HORVU.MOREX.r3.3HG0298600	TRAF	TR
HORVU.MOREX.r3.3HG0298640	TRAF	TR
HORVU.MOREX.r3.3HG0298680	MYB	TF
HORVU.MOREX.r3.3HG0299100	C2H2	TF
HORVU.MOREX.r3.3HG0299440	AP2/ERF-ERF	TF
HORVU.MOREX.r3.3HG0299650	bZIP	TF
HORVU.MOREX.r3.3HG0299740	TUB	TF
HORVU.MOREX.r3.3HG0299780	NAC	TF
HORVU.MOREX.r3.3HG0299860	C2C2-Dof	TF
HORVU.MOREX.r3.3HG0299940	SET	TR
HORVU.MOREX.r3.3HG0300150	OFP	TF
HORVU.MOREX.r3.3HG0300160	OFP	TF
HORVU.MOREX.r3.3HG0300210	MYB	TF
HORVU.MOREX.r3.3HG0300280	NAC	TF
HORVU.MOREX.r3.3HG0300660	C2H2	TF
HORVU.MOREX.r3.3HG0300720	bZIP	TF
HORVU.MOREX.r3.3HG0300770	bZIP	TF
HORVU.MOREX.r3.3HG0300790	C2H2	TF
HORVU.MOREX.r3.3HG0301170	MYB	TF
HORVU.MOREX.r3.3HG0301330	HB-WOX	TF
HORVU.MOREX.r3.3HG0301430	MYB-related	TF
HORVU.MOREX.r3.3HG0301880	MYB	TF
HORVU.MOREX.r3.3HG0302040	HB-BELL	TF
HORVU.MOREX.r3.3HG0302280	GARP-G2-like	TF
HORVU.MOREX.r3.3HG0302500	WRKY	TF
HORVU.MOREX.r3.3HG0302590	GRAS	TF
HORVU.MOREX.r3.3HG0302630	MADS-M-type	TF
HORVU.MOREX.r3.3HG0302660	MYB	TF
HORVU.MOREX.r3.3HG0302770	HB-WOX	TF
HORVU.MOREX.r3.3HG0302780	HB-WOX	TF
HORVU.MOREX.r3.3HG0303000	C2H2	TF
HORVU.MOREX.r3.3HG0303060	C2H2	TF
HORVU.MOREX.r3.3HG0303120	AP2/ERF-ERF	TF
HORVU.MOREX.r3.3HG0303380	Others	TR
HORVU.MOREX.r3.3HG0303500	C3H	TF
HORVU.MOREX.r3.3HG0303530	NF-YB	TF
HORVU.MOREX.r3.3HG0304380	WRKY	TF
HORVU.MOREX.r3.3HG0304610	LOB	TF
HORVU.MOREX.r3.3HG0304740	B3	TF
HORVU.MOREX.r3.3HG0304770	GARP-ARR-B	TF
HORVU.MOREX.r3.3HG0304880	AP2/ERF-ERF	TF
HORVU.MOREX.r3.3HG0304930	GRAS	TF
HORVU.MOREX.r3.3HG0304950	GRAS	TF
HORVU.MOREX.r3.3HG0305080	HSF	TF
HORVU.MOREX.r3.3HG0305340	bHLH	TF
HORVU.MOREX.r3.3HG0305370	AP2/ERF-AP2	TF
HORVU.MOREX.r3.3HG0305420	EIL	TF
HORVU.MOREX.r3.3HG0306010	FAR1	TF
HORVU.MOREX.r3.3HG0306270	TAZ	TR
HORVU.MOREX.r3.3HG0306520	FAR1	TF
HORVU.MOREX.r3.3HG0306540	LOB	TF
HORVU.MOREX.r3.3HG0306590	C2H2	TF
HORVU.MOREX.r3.3HG0306690	NAC	TF
HORVU.MOREX.r3.3HG0306700	C2C2-Dof	TF
HORVU.MOREX.r3.3HG0306710	Alfin-like	TF
HORVU.MOREX.r3.3HG0306860	AP2/ERF-ERF	TF
HORVU.MOREX.r3.3HG0306970	B3	TF
HORVU.MOREX.r3.3HG0307030	SWI/SNF-BAF60b	TR
HORVU.MOREX.r3.3HG0307040	NAC	TF
HORVU.MOREX.r3.3HG0307160	MADS-MIKC	TF
HORVU.MOREX.r3.3HG0307320	B3	TF
HORVU.MOREX.r3.3HG0307400	GRAS	TF
HORVU.MOREX.r3.3HG0307470	SNF2	TR
HORVU.MOREX.r3.3HG0307700	B3	TF
HORVU.MOREX.r3.3HG0307880	NAC	TF
HORVU.MOREX.r3.3HG0307960	C2H2	TF
HORVU.MOREX.r3.3HG0308180	TAZ	TR
HORVU.MOREX.r3.3HG0308190	TAZ	TR
HORVU.MOREX.r3.3HG0308250	MYB-related	TF
HORVU.MOREX.r3.3HG0308540	C2H2	TF
HORVU.MOREX.r3.3HG0308890	B3	TF
HORVU.MOREX.r3.3HG0309080	MYB	TF
HORVU.MOREX.r3.3HG0309240	B3	TF
HORVU.MOREX.r3.3HG0309530	bHLH	TF
HORVU.MOREX.r3.3HG0309660	C3H	TF
HORVU.MOREX.r3.3HG0310170	FAR1	TF
HORVU.MOREX.r3.3HG0310360	NAC	TF
HORVU.MOREX.r3.3HG0310630	AP2/ERF-ERF	TF
HORVU.MOREX.r3.3HG0310780	SBP	TF
HORVU.MOREX.r3.3HG0310820	MADS-M-type	TF
HORVU.MOREX.r3.3HG0310920	Others	TR
HORVU.MOREX.r3.3HG0310930	CAMTA	TF
HORVU.MOREX.r3.3HG0311160	MADS-M-type	TF
HORVU.MOREX.r3.3HG0311250	MADS-M-type	TF
HORVU.MOREX.r3.3HG0311460	TCP	TF
HORVU.MOREX.r3.3HG0311740	NAC	TF
HORVU.MOREX.r3.3HG0311940	MYB	TF
HORVU.MOREX.r3.3HG0312220	SET	TR
HORVU.MOREX.r3.3HG0312230	Trihelix	TF
HORVU.MOREX.r3.3HG0312310	B3-ARF	TF
HORVU.MOREX.r3.3HG0312340	bHLH	TF
HORVU.MOREX.r3.3HG0312370	bHLH	TF
HORVU.MOREX.r3.3HG0312890	FAR1	TF
HORVU.MOREX.r3.3HG0313110	B3-ARF	TF
HORVU.MOREX.r3.3HG0313210	B3	TF
HORVU.MOREX.r3.3HG0313340	NF-YB	TF
HORVU.MOREX.r3.3HG0313410	TRAF	TR
HORVU.MOREX.r3.3HG0313860	MADS-M-type	TF
HORVU.MOREX.r3.3HG0313870	HB-other	TF
HORVU.MOREX.r3.3HG0314040	C2H2	TF
HORVU.MOREX.r3.3HG0314060	B3	TF
HORVU.MOREX.r3.3HG0314140	NF-YB	TF
HORVU.MOREX.r3.3HG0314150	NF-YB	TF
HORVU.MOREX.r3.3HG0314220	SET	TR
HORVU.MOREX.r3.3HG0314610	B3	TF
HORVU.MOREX.r3.3HG0315010	TRAF	TR
HORVU.MOREX.r3.3HG0315050	SET	TR
HORVU.MOREX.r3.3HG0315090	FAR1	TF
HORVU.MOREX.r3.3HG0316260	MYB	TF
HORVU.MOREX.r3.3HG0318270	C2H2	TF
HORVU.MOREX.r3.3HG0318280	FAR1	TF
HORVU.MOREX.r3.3HG0319060	B3	TF
HORVU.MOREX.r3.3HG0319140	AP2/ERF-ERF	TF
HORVU.MOREX.r3.3HG0319180	B3	TF
HORVU.MOREX.r3.3HG0319200	B3	TF
HORVU.MOREX.r3.3HG0319210	B3	TF
HORVU.MOREX.r3.3HG0319240	B3	TF
HORVU.MOREX.r3.3HG0319270	B3	TF
HORVU.MOREX.r3.3HG0319460	NAC	TF
HORVU.MOREX.r3.3HG0319900	TRAF	TR
HORVU.MOREX.r3.3HG0320400	B3	TF
HORVU.MOREX.r3.3HG0320480	AP2/ERF-ERF	TF
HORVU.MOREX.r3.3HG0320710	SNF2	TR
HORVU.MOREX.r3.3HG0320850	NAC	TF
HORVU.MOREX.r3.3HG0321410	Others	TR
HORVU.MOREX.r3.3HG0321590	bHLH	TF
HORVU.MOREX.r3.3HG0321600	bHLH	TF
HORVU.MOREX.r3.3HG0321630	bHLH	TF
HORVU.MOREX.r3.3HG0321990	SRS	TF
HORVU.MOREX.r3.3HG0322090	LOB	TF
HORVU.MOREX.r3.3HG0322330	AP2/ERF-ERF	TF
HORVU.MOREX.r3.3HG0322490	B3	TF
HORVU.MOREX.r3.3HG0322950	C2H2	TF
HORVU.MOREX.r3.3HG0322980	PLATZ	TF
HORVU.MOREX.r3.3HG0323340	B3	TF
HORVU.MOREX.r3.3HG0323640	C2H2	TF
HORVU.MOREX.r3.3HG0325840	PHD	TR
HORVU.MOREX.r3.3HG0326530	FAR1	TF
HORVU.MOREX.r3.3HG0326620	FAR1	TF
HORVU.MOREX.r3.3HG0326920	AP2/ERF-ERF	TF
HORVU.MOREX.r3.3HG0327750	TAZ	TR
HORVU.MOREX.r3.3HG0328340	GARP-G2-like	TF
HORVU.MOREX.r3.3HG0328720	WRKY	TF
HORVU.MOREX.r3.3HG0328810	B3	TF
HORVU.MOREX.r3.3HG0329690	C2C2-Dof	TF
HORVU.MOREX.r3.3HG0329710	C2C2-Dof	TF
HORVU.MOREX.r3.3HG0329720	C2C2-Dof	TF
HORVU.MOREX.r3.3HG0329970	B3	TF
HORVU.MOREX.r3.3HG0330140	B3	TF
HORVU.MOREX.r3.3HG0330150	MYB	TF
HORVU.MOREX.r3.3HG0330170	MADS-M-type	TF
HORVU.MOREX.r3.3HG0330180	MADS-M-type	TF
HORVU.MOREX.r3.3HG0330190	MADS-M-type	TF
HORVU.MOREX.r3.3HG0330940	C2C2-GATA	TF
HORVU.MOREX.r3.3HG0331020	C3H	TF
HORVU.MOREX.r3.4HG0331350	OFP	TF
HORVU.MOREX.r3.4HG0331360	AP2/ERF-ERF	TF
HORVU.MOREX.r3.4HG0331380	AP2/ERF-ERF	TF
HORVU.MOREX.r3.4HG0331440	LOB	TF
HORVU.MOREX.r3.4HG0331610	HMG	TR
HORVU.MOREX.r3.4HG0331730	C2H2	TF
HORVU.MOREX.r3.4HG0331880	BES1	TF
HORVU.MOREX.r3.4HG0332040	NF-YB	TF
HORVU.MOREX.r3.4HG0332940	GARP-G2-like	TF
HORVU.MOREX.r3.4HG0333090	FAR1	TF
HORVU.MOREX.r3.4HG0333220	WRKY	TF
HORVU.MOREX.r3.4HG0333290	LOB	TF
HORVU.MOREX.r3.4HG0333540	GNAT	TR
HORVU.MOREX.r3.4HG0333630	Trihelix	TF
HORVU.MOREX.r3.4HG0333690	TRAF	TR
HORVU.MOREX.r3.4HG0333790	B3	TF
HORVU.MOREX.r3.4HG0333850	bHLH	TF
HORVU.MOREX.r3.4HG0333870	bHLH	TF
HORVU.MOREX.r3.4HG0333990	HB-KNOX	TF
HORVU.MOREX.r3.4HG0334040	HB-KNOX	TF
HORVU.MOREX.r3.4HG0334080	GRF	TF
HORVU.MOREX.r3.4HG0334110	bZIP	TF
HORVU.MOREX.r3.4HG0334170	MADS-M-type	TF
HORVU.MOREX.r3.4HG0334350	HB-BELL	TF
HORVU.MOREX.r3.4HG0334360	HB-BELL	TF
HORVU.MOREX.r3.4HG0334570	C2C2-GATA	TF
HORVU.MOREX.r3.4HG0334760	CPP	TF
HORVU.MOREX.r3.4HG0334840	FAR1	TF
HORVU.MOREX.r3.4HG0335570	NF-YA	TF
HORVU.MOREX.r3.4HG0335690	C3H	TF
HORVU.MOREX.r3.4HG0335780	GNAT	TR
HORVU.MOREX.r3.4HG0336430	SET	TR
HORVU.MOREX.r3.4HG0336620	GRAS	TF
HORVU.MOREX.r3.4HG0336690	TCP	TF
HORVU.MOREX.r3.4HG0336700	TCP	TF
HORVU.MOREX.r3.4HG0336720	TCP	TF
HORVU.MOREX.r3.4HG0336850	GeBP	TF
HORVU.MOREX.r3.4HG0337070	C2C2-CO-like	TF
HORVU.MOREX.r3.4HG0337720	PHD	TR
HORVU.MOREX.r3.4HG0337770	Others	TR
HORVU.MOREX.r3.4HG0337940	AP2/ERF-ERF	TF
HORVU.MOREX.r3.4HG0337970	bHLH	TF
HORVU.MOREX.r3.4HG0338090	MYB	TF
HORVU.MOREX.r3.4HG0338270	SNF2	TR
HORVU.MOREX.r3.4HG0338340	GRAS	TF
HORVU.MOREX.r3.4HG0338770	bHLH	TF
HORVU.MOREX.r3.4HG0339120	HB-KNOX	TF
HORVU.MOREX.r3.4HG0339300	bHLH	TF
HORVU.MOREX.r3.4HG0339430	GRF	TF
HORVU.MOREX.r3.4HG0339560	B3	TF
HORVU.MOREX.r3.4HG0339810	HB-BELL	TF
HORVU.MOREX.r3.4HG0340090	C2C2-GATA	TF
HORVU.MOREX.r3.4HG0340860	NAC	TF
HORVU.MOREX.r3.4HG0340870	NAC	TF
HORVU.MOREX.r3.4HG0340880	NAC	TF
HORVU.MOREX.r3.4HG0340900	WRKY	TF
HORVU.MOREX.r3.4HG0341060	Others	TR
HORVU.MOREX.r3.4HG0341360	AP2/ERF-ERF	TF
HORVU.MOREX.r3.4HG0341410	NAC	TF
HORVU.MOREX.r3.4HG0341430	GARP-G2-like	TF
HORVU.MOREX.r3.4HG0341450	B3	TF
HORVU.MOREX.r3.4HG0341460	B3	TF
HORVU.MOREX.r3.4HG0341480	B3	TF
HORVU.MOREX.r3.4HG0341500	B3	TF
HORVU.MOREX.r3.4HG0341510	B3	TF
HORVU.MOREX.r3.4HG0341520	B3	TF
HORVU.MOREX.r3.4HG0341540	B3	TF
HORVU.MOREX.r3.4HG0341910	WRKY	TF
HORVU.MOREX.r3.4HG0342170	C2H2	TF
HORVU.MOREX.r3.4HG0342180	HSF	TF
HORVU.MOREX.r3.4HG0342720	LOB	TF
HORVU.MOREX.r3.4HG0342800	C2H2	TF
HORVU.MOREX.r3.4HG0342940	LOB	TF
HORVU.MOREX.r3.4HG0343040	bHLH	TF
HORVU.MOREX.r3.4HG0343060	mTERF	TR
HORVU.MOREX.r3.4HG0343140	C2C2-Dof	TF
HORVU.MOREX.r3.4HG0343160	B3	TF
HORVU.MOREX.r3.4HG0343370	FAR1	TF
HORVU.MOREX.r3.4HG0343420	B3	TF
HORVU.MOREX.r3.4HG0343430	B3	TF
HORVU.MOREX.r3.4HG0343440	B3	TF
HORVU.MOREX.r3.4HG0343580	HB-HD-ZIP	TF
HORVU.MOREX.r3.4HG0343670	RWP-RK	TF
HORVU.MOREX.r3.4HG0344110	Alfin-like	TF
HORVU.MOREX.r3.4HG0344270	zf-HD	TF
HORVU.MOREX.r3.4HG0344430	AP2/ERF-ERF	TF
HORVU.MOREX.r3.4HG0344750	PHD	TR
HORVU.MOREX.r3.4HG0345160	AUX/IAA	TR
HORVU.MOREX.r3.4HG0345170	AUX/IAA	TR
HORVU.MOREX.r3.4HG0345830	FAR1	TF
HORVU.MOREX.r3.4HG0346020	MYB	TF
HORVU.MOREX.r3.4HG0346280	mTERF	TR
HORVU.MOREX.r3.4HG0346770	B3	TF
HORVU.MOREX.r3.4HG0346910	C2H2	TF
HORVU.MOREX.r3.4HG0346960	C2H2	TF
HORVU.MOREX.r3.4HG0347200	C2C2-GATA	TF
HORVU.MOREX.r3.4HG0347360	NAC	TF
HORVU.MOREX.r3.4HG0347540	B3	TF
HORVU.MOREX.r3.4HG0347690	B3	TF
HORVU.MOREX.r3.4HG0347760	MYB	TF
HORVU.MOREX.r3.4HG0348060	B3	TF
HORVU.MOREX.r3.4HG0348070	B3	TF
HORVU.MOREX.r3.4HG0348080	B3	TF
HORVU.MOREX.r3.4HG0348310	FAR1	TF
HORVU.MOREX.r3.4HG0348650	LOB	TF
HORVU.MOREX.r3.4HG0348800	TCP	TF
HORVU.MOREX.r3.4HG0349280	C2H2	TF
HORVU.MOREX.r3.4HG0349530	TUB	TF
HORVU.MOREX.r3.4HG0349550	Trihelix	TF
HORVU.MOREX.r3.4HG0349660	FAR1	TF
HORVU.MOREX.r3.4HG0349850	GRAS	TF
HORVU.MOREX.r3.4HG0349900	bZIP	TF
HORVU.MOREX.r3.4HG0350220	HB-BELL	TF
HORVU.MOREX.r3.4HG0350620	C2H2	TF
HORVU.MOREX.r3.4HG0350690	Others	TR
HORVU.MOREX.r3.4HG0351130	OFP	TF
HORVU.MOREX.r3.4HG0351150	OFP	TF
HORVU.MOREX.r3.4HG0351290	B3	TF
HORVU.MOREX.r3.4HG0351410	bZIP	TF
HORVU.MOREX.r3.4HG0351750	TRAF	TR
HORVU.MOREX.r3.4HG0352000	C2H2	TF
HORVU.MOREX.r3.4HG0352780	WRKY	TF
HORVU.MOREX.r3.4HG0352930	AP2/ERF-ERF	TF
HORVU.MOREX.r3.4HG0353010	B3	TF
HORVU.MOREX.r3.4HG0353430	MYB	TF
HORVU.MOREX.r3.4HG0353780	GRAS	TF
HORVU.MOREX.r3.4HG0354170	Others	TR
HORVU.MOREX.r3.4HG0354720	AP2/ERF-AP2	TF
HORVU.MOREX.r3.4HG0355130	PHD	TR
HORVU.MOREX.r3.4HG0355210	bZIP	TF
HORVU.MOREX.r3.4HG0355590	DDT	TR
HORVU.MOREX.r3.4HG0355970	FAR1	TF
HORVU.MOREX.r3.4HG0356090	GRAS	TF
HORVU.MOREX.r3.4HG0356170	NAC	TF
HORVU.MOREX.r3.4HG0357380	C2H2	TF
HORVU.MOREX.r3.4HG0357680	GRAS	TF
HORVU.MOREX.r3.4HG0357830	GRAS	TF
HORVU.MOREX.r3.4HG0357840	GRAS	TF
HORVU.MOREX.r3.4HG0357930	GRAS	TF
HORVU.MOREX.r3.4HG0357950	GRAS	TF
HORVU.MOREX.r3.4HG0358310	GRAS	TF
HORVU.MOREX.r3.4HG0358340	GRAS	TF
HORVU.MOREX.r3.4HG0358620	C2H2	TF
HORVU.MOREX.r3.4HG0358770	MYB-related	TF
HORVU.MOREX.r3.4HG0359060	MYB	TF
HORVU.MOREX.r3.4HG0360310	B3	TF
HORVU.MOREX.r3.4HG0360400	PHD	TR
HORVU.MOREX.r3.4HG0361490	B3	TF
HORVU.MOREX.r3.4HG0362740	MADS-M-type	TF
HORVU.MOREX.r3.4HG0363560	FAR1	TF
HORVU.MOREX.r3.4HG0364520	NF-YC	TF
HORVU.MOREX.r3.4HG0366190	FAR1	TF
HORVU.MOREX.r3.4HG0368070	GRF	TF
HORVU.MOREX.r3.4HG0370070	FAR1	TF
HORVU.MOREX.r3.4HG0370540	RB	TR
HORVU.MOREX.r3.4HG0372140	B3	TF
HORVU.MOREX.r3.4HG0374480	mTERF	TR
HORVU.MOREX.r3.4HG0374640	GeBP	TF
HORVU.MOREX.r3.4HG0375120	SNF2	TR
HORVU.MOREX.r3.4HG0375930	Jumonji	TR
HORVU.MOREX.r3.4HG0376140	B3	TF
HORVU.MOREX.r3.4HG0376920	WRKY	TF
HORVU.MOREX.r3.4HG0377080	TUB	TF
HORVU.MOREX.r3.4HG0377280	Others	TR
HORVU.MOREX.r3.4HG0378330	OFP	TF
HORVU.MOREX.r3.4HG0378520	NAC	TF
HORVU.MOREX.r3.4HG0378580	bZIP	TF
HORVU.MOREX.r3.4HG0378680	WRKY	TF
HORVU.MOREX.r3.4HG0379380	GARP-G2-like	TF
HORVU.MOREX.r3.4HG0379610	NAC	TF
HORVU.MOREX.r3.4HG0379620	AP2/ERF-ERF	TF
HORVU.MOREX.r3.4HG0379700	NAC	TF
HORVU.MOREX.r3.4HG0379710	Others	TR
HORVU.MOREX.r3.4HG0379880	HB-WOX	TF
HORVU.MOREX.r3.4HG0379900	GARP-G2-like	TF
HORVU.MOREX.r3.4HG0380030	EIL	TF
HORVU.MOREX.r3.4HG0380200	bZIP	TF
HORVU.MOREX.r3.4HG0380330	WRKY	TF
HORVU.MOREX.r3.4HG0380340	FAR1	TF
HORVU.MOREX.r3.4HG0380820	bZIP	TF
HORVU.MOREX.r3.4HG0380990	MYB	TF
HORVU.MOREX.r3.4HG0381010	bHLH	TF
HORVU.MOREX.r3.4HG0381400	AP2/ERF-AP2	TF
HORVU.MOREX.r3.4HG0381570	FAR1	TF
HORVU.MOREX.r3.4HG0382250	SET	TR
HORVU.MOREX.r3.4HG0382520	bZIP	TF
HORVU.MOREX.r3.4HG0382810	B3	TF
HORVU.MOREX.r3.4HG0383040	MYB	TF
HORVU.MOREX.r3.4HG0383230	PHD	TR
HORVU.MOREX.r3.4HG0383320	C3H	TF
HORVU.MOREX.r3.4HG0384200	MYB	TF
HORVU.MOREX.r3.4HG0384450	Trihelix	TF
HORVU.MOREX.r3.4HG0384470	Trihelix	TF
HORVU.MOREX.r3.4HG0384820	PHD	TR
HORVU.MOREX.r3.4HG0384990	B3	TF
HORVU.MOREX.r3.4HG0385430	LOB	TF
HORVU.MOREX.r3.4HG0385940	Pseudo ARR-B	TR
HORVU.MOREX.r3.4HG0386610	Others	TR
HORVU.MOREX.r3.4HG0386620	C2H2	TF
HORVU.MOREX.r3.4HG0387000	C2H2	TF
HORVU.MOREX.r3.4HG0387020	C2H2	TF
HORVU.MOREX.r3.4HG0387030	SET	TR
HORVU.MOREX.r3.4HG0388120	C2C2-Dof	TF
HORVU.MOREX.r3.4HG0388760	FAR1	TF
HORVU.MOREX.r3.4HG0389200	Others	TR
HORVU.MOREX.r3.4HG0389470	LIM	TF
HORVU.MOREX.r3.4HG0389700	C2H2	TF
HORVU.MOREX.r3.4HG0390030	GRAS	TF
HORVU.MOREX.r3.4HG0390130	AP2/ERF-ERF	TF
HORVU.MOREX.r3.4HG0390530	bHLH	TF
HORVU.MOREX.r3.4HG0391050	FAR1	TF
HORVU.MOREX.r3.4HG0391110	FAR1	TF
HORVU.MOREX.r3.4HG0391280	C3H	TF
HORVU.MOREX.r3.4HG0391340	MYB-related	TF
HORVU.MOREX.r3.4HG0391570	NF-YC	TF
HORVU.MOREX.r3.4HG0391970	LOB	TF
HORVU.MOREX.r3.4HG0392620	MYB	TF
HORVU.MOREX.r3.4HG0392660	bHLH	TF
HORVU.MOREX.r3.4HG0393010	MYB-related	TF
HORVU.MOREX.r3.4HG0393110	bZIP	TF
HORVU.MOREX.r3.4HG0393120	C2H2	TF
HORVU.MOREX.r3.4HG0393450	NAC	TF
HORVU.MOREX.r3.4HG0393590	BBR-BPC	TF
HORVU.MOREX.r3.4HG0393610	C2H2	TF
HORVU.MOREX.r3.4HG0393680	MYB	TF
HORVU.MOREX.r3.4HG0394070	FAR1	TF
HORVU.MOREX.r3.4HG0394410	bHLH	TF
HORVU.MOREX.r3.4HG0394540	Others	TR
HORVU.MOREX.r3.4HG0394550	C2H2	TF
HORVU.MOREX.r3.4HG0394590	HB-HD-ZIP	TF
HORVU.MOREX.r3.4HG0394680	bHLH	TF
HORVU.MOREX.r3.4HG0394710	AP2/ERF-AP2	TF
HORVU.MOREX.r3.4HG0395190	HSF	TF
HORVU.MOREX.r3.4HG0395240	GARP-ARR-B	TF
HORVU.MOREX.r3.4HG0395370	B3	TF
HORVU.MOREX.r3.4HG0395920	NAC	TF
HORVU.MOREX.r3.4HG0396350	AP2/ERF-ERF	TF
HORVU.MOREX.r3.4HG0396400	MADS-MIKC	TF
HORVU.MOREX.r3.4HG0396410	MADS-M-type	TF
HORVU.MOREX.r3.4HG0396460	B3	TF
HORVU.MOREX.r3.4HG0396510	C2C2-YABBY	TF
HORVU.MOREX.r3.4HG0397000	MYB-related	TF
HORVU.MOREX.r3.4HG0397110	B3	TF
HORVU.MOREX.r3.4HG0397260	B3	TF
HORVU.MOREX.r3.4HG0397600	B3	TF
HORVU.MOREX.r3.4HG0398360	GNAT	TR
HORVU.MOREX.r3.4HG0398440	MYB	TF
HORVU.MOREX.r3.4HG0398470	bHLH	TF
HORVU.MOREX.r3.4HG0399240	HB-other	TF
HORVU.MOREX.r3.4HG0399460	OFP	TF
HORVU.MOREX.r3.4HG0399530	C2H2	TF
HORVU.MOREX.r3.4HG0400030	GNAT	TR
HORVU.MOREX.r3.4HG0400300	GRAS	TF
HORVU.MOREX.r3.4HG0400710	AP2/ERF-ERF	TF
HORVU.MOREX.r3.4HG0400800	E2F-DP	TF
HORVU.MOREX.r3.4HG0401460	AP2/ERF-ERF	TF
HORVU.MOREX.r3.4HG0401760	FAR1	TF
HORVU.MOREX.r3.4HG0402030	bHLH	TF
HORVU.MOREX.r3.4HG0402170	HSF	TF
HORVU.MOREX.r3.4HG0402590	mTERF	TR
HORVU.MOREX.r3.4HG0402620	SET	TR
HORVU.MOREX.r3.4HG0402720	SNF2	TR
HORVU.MOREX.r3.4HG0402730	HB-BELL	TF
HORVU.MOREX.r3.4HG0402770	B3	TF
HORVU.MOREX.r3.4HG0402780	AP2/ERF-ERF	TF
HORVU.MOREX.r3.4HG0403230	SET	TR
HORVU.MOREX.r3.4HG0403400	C2C2-Dof	TF
HORVU.MOREX.r3.4HG0403440	B3	TF
HORVU.MOREX.r3.4HG0403590	HB-HD-ZIP	TF
HORVU.MOREX.r3.4HG0403680	bHLH	TF
HORVU.MOREX.r3.4HG0403770	bHLH	TF
HORVU.MOREX.r3.4HG0404100	AP2/ERF-ERF	TF
HORVU.MOREX.r3.4HG0404220	NF-YA	TF
HORVU.MOREX.r3.4HG0404330	FAR1	TF
HORVU.MOREX.r3.4HG0404500	GNAT	TR
HORVU.MOREX.r3.4HG0404560	AP2/ERF-AP2	TF
HORVU.MOREX.r3.4HG0405070	C2H2	TF
HORVU.MOREX.r3.4HG0405100	FAR1	TF
HORVU.MOREX.r3.4HG0405120	FAR1	TF
HORVU.MOREX.r3.4HG0405230	Tify	TF
HORVU.MOREX.r3.4HG0405240	Tify	TF
HORVU.MOREX.r3.4HG0405380	FAR1	TF
HORVU.MOREX.r3.4HG0405580	MYB	TF
HORVU.MOREX.r3.4HG0405650	AP2/ERF-ERF	TF
HORVU.MOREX.r3.4HG0405710	AP2/ERF-ERF	TF
HORVU.MOREX.r3.4HG0405770	FAR1	TF
HORVU.MOREX.r3.4HG0405940	B3	TF
HORVU.MOREX.r3.4HG0406030	TRAF	TR
HORVU.MOREX.r3.4HG0406100	AP2/ERF-ERF	TF
HORVU.MOREX.r3.4HG0406150	MADS-MIKC	TF
HORVU.MOREX.r3.4HG0406540	bHLH	TF
HORVU.MOREX.r3.4HG0406710	HB-HD-ZIP	TF
HORVU.MOREX.r3.4HG0406930	CAMTA	TF
HORVU.MOREX.r3.4HG0407160	bHLH	TF
HORVU.MOREX.r3.4HG0407180	bHLH	TF
HORVU.MOREX.r3.4HG0407380	C2C2-GATA	TF
HORVU.MOREX.r3.4HG0407760	TRAF	TR
HORVU.MOREX.r3.4HG0407800	TRAF	TR
HORVU.MOREX.r3.4HG0407830	MYB	TF
HORVU.MOREX.r3.4HG0408210	C2H2	TF
HORVU.MOREX.r3.4HG0408230	B3	TF
HORVU.MOREX.r3.4HG0408240	C2H2	TF
HORVU.MOREX.r3.4HG0408270	LOB	TF
HORVU.MOREX.r3.4HG0408280	LOB	TF
HORVU.MOREX.r3.4HG0408430	AP2/ERF-ERF	TF
HORVU.MOREX.r3.4HG0408610	GRAS	TF
HORVU.MOREX.r3.4HG0409010	bHLH	TF
HORVU.MOREX.r3.4HG0409140	AP2/ERF-ERF	TF
HORVU.MOREX.r3.4HG0409490	NAC	TF
HORVU.MOREX.r3.4HG0409510	NAC	TF
HORVU.MOREX.r3.4HG0409520	NAC	TF
HORVU.MOREX.r3.4HG0409950	AP2/ERF-RAV	TF
HORVU.MOREX.r3.4HG0410010	AP2/ERF-RAV	TF
HORVU.MOREX.r3.4HG0410020	RWP-RK	TF
HORVU.MOREX.r3.4HG0410350	bHLH	TF
HORVU.MOREX.r3.4HG0410360	B3	TF
HORVU.MOREX.r3.4HG0410400	GARP-G2-like	TF
HORVU.MOREX.r3.4HG0410410	WRKY	TF
HORVU.MOREX.r3.4HG0410460	FAR1	TF
HORVU.MOREX.r3.4HG0410500	MYB	TF
HORVU.MOREX.r3.4HG0410680	B3	TF
HORVU.MOREX.r3.4HG0410830	bZIP	TF
HORVU.MOREX.r3.4HG0410880	NAC	TF
HORVU.MOREX.r3.4HG0410980	OFP	TF
HORVU.MOREX.r3.4HG0411000	C2H2	TF
HORVU.MOREX.r3.4HG0411010	C2H2	TF
HORVU.MOREX.r3.4HG0411150	AP2/ERF-ERF	TF
HORVU.MOREX.r3.4HG0411230	bHLH	TF
HORVU.MOREX.r3.4HG0411270	GNAT	TR
HORVU.MOREX.r3.4HG0411310	C2H2	TF
HORVU.MOREX.r3.4HG0411520	bZIP	TF
HORVU.MOREX.r3.4HG0411680	Others	TR
HORVU.MOREX.r3.4HG0412080	MYB	TF
HORVU.MOREX.r3.4HG0412330	HB-BELL	TF
HORVU.MOREX.r3.4HG0412370	HB-KNOX	TF
HORVU.MOREX.r3.4HG0412460	MADS-MIKC	TF
HORVU.MOREX.r3.4HG0412560	bHLH	TF
HORVU.MOREX.r3.4HG0412680	B3	TF
HORVU.MOREX.r3.4HG0412900	FAR1	TF
HORVU.MOREX.r3.4HG0413050	NAC	TF
HORVU.MOREX.r3.4HG0413180	MADS-M-type	TF
HORVU.MOREX.r3.4HG0413600	AP2/ERF-ERF	TF
HORVU.MOREX.r3.4HG0414010	FAR1	TF
HORVU.MOREX.r3.4HG0414370	LOB	TF
HORVU.MOREX.r3.4HG0414380	LOB	TF
HORVU.MOREX.r3.4HG0414440	TRAF	TR
HORVU.MOREX.r3.4HG0415180	Tify	TF
HORVU.MOREX.r3.4HG0415230	bHLH	TF
HORVU.MOREX.r3.4HG0415290	bHLH	TF
HORVU.MOREX.r3.4HG0415430	MYB	TF
HORVU.MOREX.r3.4HG0415480	GRAS	TF
HORVU.MOREX.r3.4HG0415650	AP2/ERF-ERF	TF
HORVU.MOREX.r3.4HG0416070	C2C2-GATA	TF
HORVU.MOREX.r3.4HG0416240	SNF2	TR
HORVU.MOREX.r3.4HG0416490	C2H2	TF
HORVU.MOREX.r3.4HG0416970	Trihelix	TF
HORVU.MOREX.r3.4HG0417220	TRAF	TR
HORVU.MOREX.r3.4HG0417310	NAC	TF
HORVU.MOREX.r3.4HG0417500	NAC	TF
HORVU.MOREX.r3.4HG0417910	HSF	TF
HORVU.MOREX.r3.4HG0417970	HB-HD-ZIP	TF
HORVU.MOREX.r3.4HG0418180	HSF	TF
HORVU.MOREX.r3.4HG0418760	FAR1	TF
HORVU.MOREX.r3.5HG0419840	MADS-MIKC	TF
HORVU.MOREX.r3.5HG0419930	MADS-MIKC	TF
HORVU.MOREX.r3.5HG0420450	C2C2-LSD	TF
HORVU.MOREX.r3.5HG0420480	HB-BELL	TF
HORVU.MOREX.r3.5HG0420650	B3	TF
HORVU.MOREX.r3.5HG0420910	B3	TF
HORVU.MOREX.r3.5HG0421420	bHLH	TF
HORVU.MOREX.r3.5HG0423980	bZIP	TF
HORVU.MOREX.r3.5HG0424280	C2C2-GATA	TF
HORVU.MOREX.r3.5HG0425050	TRAF	TR
HORVU.MOREX.r3.5HG0425540	B3	TF
HORVU.MOREX.r3.5HG0425590	B3	TF
HORVU.MOREX.r3.5HG0425660	C2C2-YABBY	TF
HORVU.MOREX.r3.5HG0426060	FAR1	TF
HORVU.MOREX.r3.5HG0426260	NF-YA	TF
HORVU.MOREX.r3.5HG0426390	B3	TF
HORVU.MOREX.r3.5HG0426530	AP2/ERF-ERF	TF
HORVU.MOREX.r3.5HG0426840	TCP	TF
HORVU.MOREX.r3.5HG0427170	FAR1	TF
HORVU.MOREX.r3.5HG0427590	TRAF	TR
HORVU.MOREX.r3.5HG0427600	TRAF	TR
HORVU.MOREX.r3.5HG0428100	B3-ARF	TF
HORVU.MOREX.r3.5HG0428320	C2H2	TF
HORVU.MOREX.r3.5HG0428360	TRAF	TR
HORVU.MOREX.r3.5HG0428450	MYB-related	TF
HORVU.MOREX.r3.5HG0428850	SET	TR
HORVU.MOREX.r3.5HG0429050	NF-YA	TF
HORVU.MOREX.r3.5HG0429100	HB-HD-ZIP	TF
HORVU.MOREX.r3.5HG0429230	FAR1	TF
HORVU.MOREX.r3.5HG0430170	C2C2-LSD	TF
HORVU.MOREX.r3.5HG0430200	NAC	TF
HORVU.MOREX.r3.5HG0430270	bHLH	TF
HORVU.MOREX.r3.5HG0431150	B3	TF
HORVU.MOREX.r3.5HG0431810	C2H2	TF
HORVU.MOREX.r3.5HG0432030	CPP	TF
HORVU.MOREX.r3.5HG0432090	AP2/ERF-ERF	TF
HORVU.MOREX.r3.5HG0432270	CPP	TF
HORVU.MOREX.r3.5HG0432580	NAC	TF
HORVU.MOREX.r3.5HG0432590	NAC	TF
HORVU.MOREX.r3.5HG0432600	NAC	TF
HORVU.MOREX.r3.5HG0432610	NAC	TF
HORVU.MOREX.r3.5HG0432620	NAC	TF
HORVU.MOREX.r3.5HG0432920	NAC	TF
HORVU.MOREX.r3.5HG0432930	NAC	TF
HORVU.MOREX.r3.5HG0433050	B3	TF
HORVU.MOREX.r3.5HG0433250	bZIP	TF
HORVU.MOREX.r3.5HG0433440	AUX/IAA	TR
HORVU.MOREX.r3.5HG0433470	AUX/IAA	TR
HORVU.MOREX.r3.5HG0433720	bHLH	TF
HORVU.MOREX.r3.5HG0433910	WRKY	TF
HORVU.MOREX.r3.5HG0434020	B3	TF
HORVU.MOREX.r3.5HG0434270	WRKY	TF
HORVU.MOREX.r3.5HG0434350	FAR1	TF
HORVU.MOREX.r3.5HG0436650	Others	TR
HORVU.MOREX.r3.5HG0437600	GARP-G2-like	TF
HORVU.MOREX.r3.5HG0437620	B3	TF
HORVU.MOREX.r3.5HG0437690	AP2/ERF-ERF	TF
HORVU.MOREX.r3.5HG0437700	B3	TF
HORVU.MOREX.r3.5HG0437710	FAR1	TF
HORVU.MOREX.r3.5HG0438120	C3H	TF
HORVU.MOREX.r3.5HG0438180	B3	TF
HORVU.MOREX.r3.5HG0438190	B3	TF
HORVU.MOREX.r3.5HG0438210	B3	TF
HORVU.MOREX.r3.5HG0438220	B3	TF
HORVU.MOREX.r3.5HG0438250	B3	TF
HORVU.MOREX.r3.5HG0438270	B3	TF
HORVU.MOREX.r3.5HG0438300	FAR1	TF
HORVU.MOREX.r3.5HG0438330	B3	TF
HORVU.MOREX.r3.5HG0438460	bHLH	TF
HORVU.MOREX.r3.5HG0438620	GARP-G2-like	TF
HORVU.MOREX.r3.5HG0438880	C2H2	TF
HORVU.MOREX.r3.5HG0439080	AP2/ERF-ERF	TF
HORVU.MOREX.r3.5HG0439500	B3	TF
HORVU.MOREX.r3.5HG0439710	C2H2	TF
HORVU.MOREX.r3.5HG0439970	B3	TF
HORVU.MOREX.r3.5HG0440380	NAC	TF
HORVU.MOREX.r3.5HG0440900	FAR1	TF
HORVU.MOREX.r3.5HG0441360	GRAS	TF
HORVU.MOREX.r3.5HG0441760	MYB	TF
HORVU.MOREX.r3.5HG0441840	C2C2-Dof	TF
HORVU.MOREX.r3.5HG0441870	C2H2	TF
HORVU.MOREX.r3.5HG0442330	MYB-related	TF
HORVU.MOREX.r3.5HG0442370	MYB-related	TF
HORVU.MOREX.r3.5HG0442590	FAR1	TF
HORVU.MOREX.r3.5HG0442720	HB-WOX	TF
HORVU.MOREX.r3.5HG0442790	NAC	TF
HORVU.MOREX.r3.5HG0443240	MYB	TF
HORVU.MOREX.r3.5HG0443350	C2H2	TF
HORVU.MOREX.r3.5HG0443520	bZIP	TF
HORVU.MOREX.r3.5HG0443910	B3	TF
HORVU.MOREX.r3.5HG0444050	bHLH	TF
HORVU.MOREX.r3.5HG0446500	B3	TF
HORVU.MOREX.r3.5HG0447180	PHD	TR
HORVU.MOREX.r3.5HG0447610	C3H	TF
HORVU.MOREX.r3.5HG0447760	MYB	TF
HORVU.MOREX.r3.5HG0448250	LIM	TF
HORVU.MOREX.r3.5HG0448530	SWI/SNF-BAF60b	TR
HORVU.MOREX.r3.5HG0448590	WRKY	TF
HORVU.MOREX.r3.5HG0448940	C2H2	TF
HORVU.MOREX.r3.5HG0449210	bZIP	TF
HORVU.MOREX.r3.5HG0449510	B3	TF
HORVU.MOREX.r3.5HG0451080	C2H2	TF
HORVU.MOREX.r3.5HG0451090	Others	TR
HORVU.MOREX.r3.5HG0451310	FAR1	TF
HORVU.MOREX.r3.5HG0452200	B3	TF
HORVU.MOREX.r3.5HG0452510	B3	TF
HORVU.MOREX.r3.5HG0452840	C3H	TF
HORVU.MOREX.r3.5HG0454080	C2H2	TF
HORVU.MOREX.r3.5HG0454390	IWS1	TR
HORVU.MOREX.r3.5HG0454540	TCP	TF
HORVU.MOREX.r3.5HG0454780	C2C2-GATA	TF
HORVU.MOREX.r3.5HG0455020	AP2/ERF-ERF	TF
HORVU.MOREX.r3.5HG0455060	SET	TR
HORVU.MOREX.r3.5HG0455320	MYB	TF
HORVU.MOREX.r3.5HG0455530	bHLH	TF
HORVU.MOREX.r3.5HG0456170	C3H	TF
HORVU.MOREX.r3.5HG0457280	AP2/ERF-ERF	TF
HORVU.MOREX.r3.5HG0457870	bZIP	TF
HORVU.MOREX.r3.5HG0457930	GNAT	TR
HORVU.MOREX.r3.5HG0457960	TUB	TF
HORVU.MOREX.r3.5HG0458170	E2F-DP	TF
HORVU.MOREX.r3.5HG0458300	OFP	TF
HORVU.MOREX.r3.5HG0458320	OFP	TF
HORVU.MOREX.r3.5HG0458480	bZIP	TF
HORVU.MOREX.r3.5HG0458770	B3	TF
HORVU.MOREX.r3.5HG0458840	NAC	TF
HORVU.MOREX.r3.5HG0459450	DDT	TR
HORVU.MOREX.r3.5HG0460770	Others	TR
HORVU.MOREX.r3.5HG0460940	TRAF	TR
HORVU.MOREX.r3.5HG0460950	GRAS	TF
HORVU.MOREX.r3.5HG0461170	FAR1	TF
HORVU.MOREX.r3.5HG0461700	C2H2	TF
HORVU.MOREX.r3.5HG0461840	FAR1	TF
HORVU.MOREX.r3.5HG0462530	GRAS	TF
HORVU.MOREX.r3.5HG0462770	SET	TR
HORVU.MOREX.r3.5HG0463060	bZIP	TF
HORVU.MOREX.r3.5HG0463120	AP2/ERF-AP2	TF
HORVU.MOREX.r3.5HG0463340	MYB	TF
HORVU.MOREX.r3.5HG0463370	zf-HD	TF
HORVU.MOREX.r3.5HG0463440	NAC	TF
HORVU.MOREX.r3.5HG0463450	NAC	TF
HORVU.MOREX.r3.5HG0463490	bZIP	TF
HORVU.MOREX.r3.5HG0463700	GRAS	TF
HORVU.MOREX.r3.5HG0464040	GNAT	TR
HORVU.MOREX.r3.5HG0464240	WRKY	TF
HORVU.MOREX.r3.5HG0464260	WRKY	TF
HORVU.MOREX.r3.5HG0464270	WRKY	TF
HORVU.MOREX.r3.5HG0465420	LOB	TF
HORVU.MOREX.r3.5HG0465640	GARP-G2-like	TF
HORVU.MOREX.r3.5HG0466550	C2C2-Dof	TF
HORVU.MOREX.r3.5HG0466730	C2H2	TF
HORVU.MOREX.r3.5HG0466860	WRKY	TF
HORVU.MOREX.r3.5HG0467090	HB-WOX	TF
HORVU.MOREX.r3.5HG0467140	Others	TR
HORVU.MOREX.r3.5HG0467150	Others	TR
HORVU.MOREX.r3.5HG0467660	MYB	TF
HORVU.MOREX.r3.5HG0468150	FAR1	TF
HORVU.MOREX.r3.5HG0468840	SWI/SNF-BAF60b	TR
HORVU.MOREX.r3.5HG0469040	PHD	TR
HORVU.MOREX.r3.5HG0469210	C2C2-CO-like	TF
HORVU.MOREX.r3.5HG0469230	Jumonji	TR
HORVU.MOREX.r3.5HG0469540	AP2/ERF-ERF	TF
HORVU.MOREX.r3.5HG0470190	FAR1	TF
HORVU.MOREX.r3.5HG0470510	C2H2	TF
HORVU.MOREX.r3.5HG0470590	WRKY	TF
HORVU.MOREX.r3.5HG0471090	bZIP	TF
HORVU.MOREX.r3.5HG0471210	C2H2	TF
HORVU.MOREX.r3.5HG0471940	GARP-G2-like	TF
HORVU.MOREX.r3.5HG0471950	GARP-G2-like	TF
HORVU.MOREX.r3.5HG0472040	bZIP	TF
HORVU.MOREX.r3.5HG0472460	C2H2	TF
HORVU.MOREX.r3.5HG0472530	SET	TR
HORVU.MOREX.r3.5HG0472740	B3	TF
HORVU.MOREX.r3.5HG0472800	AP2/ERF-ERF	TF
HORVU.MOREX.r3.5HG0474120	WRKY	TF
HORVU.MOREX.r3.5HG0474130	WRKY	TF
HORVU.MOREX.r3.5HG0474160	B3	TF
HORVU.MOREX.r3.5HG0474200	TRAF	TR
HORVU.MOREX.r3.5HG0474390	B3	TF
HORVU.MOREX.r3.5HG0474400	AP2/ERF-ERF	TF
HORVU.MOREX.r3.5HG0474550	GNAT	TR
HORVU.MOREX.r3.5HG0474610	SET	TR
HORVU.MOREX.r3.5HG0474940	OFP	TF
HORVU.MOREX.r3.5HG0475080	B3	TF
HORVU.MOREX.r3.5HG0475090	mTERF	TR
HORVU.MOREX.r3.5HG0475650	SET	TR
HORVU.MOREX.r3.5HG0475920	C3H	TF
HORVU.MOREX.r3.5HG0475930	LOB	TF
HORVU.MOREX.r3.5HG0476520	AP2/ERF-ERF	TF
HORVU.MOREX.r3.5HG0476590	FAR1	TF
HORVU.MOREX.r3.5HG0477580	FAR1	TF
HORVU.MOREX.r3.5HG0477650	C2H2	TF
HORVU.MOREX.r3.5HG0477680	bHLH	TF
HORVU.MOREX.r3.5HG0477750	HB-HD-ZIP	TF
HORVU.MOREX.r3.5HG0478440	PHD	TR
HORVU.MOREX.r3.5HG0478600	Jumonji	TR
HORVU.MOREX.r3.5HG0478780	GARP-G2-like	TF
HORVU.MOREX.r3.5HG0479070	MYB	TF
HORVU.MOREX.r3.5HG0479120	Tify	TF
HORVU.MOREX.r3.5HG0479720	TCP	TF
HORVU.MOREX.r3.5HG0479800	FAR1	TF
HORVU.MOREX.r3.5HG0480600	Tify	TF
HORVU.MOREX.r3.5HG0481050	FAR1	TF
HORVU.MOREX.r3.5HG0481240	AP2/ERF-ERF	TF
HORVU.MOREX.r3.5HG0481310	ARID	TR
HORVU.MOREX.r3.5HG0481550	GRAS	TF
HORVU.MOREX.r3.5HG0481640	C2H2	TF
HORVU.MOREX.r3.5HG0481670	C2H2	TF
HORVU.MOREX.r3.5HG0481700	MYB	TF
HORVU.MOREX.r3.5HG0482530	AP2/ERF-AP2	TF
HORVU.MOREX.r3.5HG0484040	WRKY	TF
HORVU.MOREX.r3.5HG0484060	WRKY	TF
HORVU.MOREX.r3.5HG0484070	WRKY	TF
HORVU.MOREX.r3.5HG0484090	bHLH	TF
HORVU.MOREX.r3.5HG0484290	zf-HD	TF
HORVU.MOREX.r3.5HG0484310	zf-HD	TF
HORVU.MOREX.r3.5HG0484320	MYB	TF
HORVU.MOREX.r3.5HG0484530	NAC	TF
HORVU.MOREX.r3.5HG0484760	SET	TR
HORVU.MOREX.r3.5HG0484930	bHLH	TF
HORVU.MOREX.r3.5HG0485390	HB-HD-ZIP	TF
HORVU.MOREX.r3.5HG0485710	PHD	TR
HORVU.MOREX.r3.5HG0485730	C2H2	TF
HORVU.MOREX.r3.5HG0485830	GeBP	TF
HORVU.MOREX.r3.5HG0486260	HSF	TF
HORVU.MOREX.r3.5HG0486320	bHLH	TF
HORVU.MOREX.r3.5HG0486380	bZIP	TF
HORVU.MOREX.r3.5HG0486440	HSF	TF
HORVU.MOREX.r3.5HG0486530	AP2/ERF-ERF	TF
HORVU.MOREX.r3.5HG0487210	AP2/ERF-ERF	TF
HORVU.MOREX.r3.5HG0487250	mTERF	TR
HORVU.MOREX.r3.5HG0487550	bHLH	TF
HORVU.MOREX.r3.5HG0487750	zf-HD	TF
HORVU.MOREX.r3.5HG0488000	bHLH	TF
HORVU.MOREX.r3.5HG0488170	HB-HD-ZIP	TF
HORVU.MOREX.r3.5HG0488350	C2H2	TF
HORVU.MOREX.r3.5HG0488370	bHLH	TF
HORVU.MOREX.r3.5HG0488420	bZIP	TF
HORVU.MOREX.r3.5HG0488610	bHLH	TF
HORVU.MOREX.r3.5HG0488650	C2C2-Dof	TF
HORVU.MOREX.r3.5HG0489380	AP2/ERF-ERF	TF
HORVU.MOREX.r3.5HG0489580	NF-YC	TF
HORVU.MOREX.r3.5HG0489860	WRKY	TF
HORVU.MOREX.r3.5HG0490540	C2H2	TF
HORVU.MOREX.r3.5HG0490730	bHLH	TF
HORVU.MOREX.r3.5HG0490760	GNAT	TR
HORVU.MOREX.r3.5HG0490830	Jumonji	TR
HORVU.MOREX.r3.5HG0490840	bZIP	TF
HORVU.MOREX.r3.5HG0490860	EIL	TF
HORVU.MOREX.r3.5HG0490900	SBP	TF
HORVU.MOREX.r3.5HG0490960	MYB-related	TF
HORVU.MOREX.r3.5HG0491640	B3	TF
HORVU.MOREX.r3.5HG0491650	B3	TF
HORVU.MOREX.r3.5HG0492460	NAC	TF
HORVU.MOREX.r3.5HG0492890	MYB-related	TF
HORVU.MOREX.r3.5HG0492940	MYB-related	TF
HORVU.MOREX.r3.5HG0493040	bHLH	TF
HORVU.MOREX.r3.5HG0493820	LOB	TF
HORVU.MOREX.r3.5HG0494170	SBP	TF
HORVU.MOREX.r3.5HG0494180	SBP	TF
HORVU.MOREX.r3.5HG0494190	MADS-MIKC	TF
HORVU.MOREX.r3.5HG0494790	NAC	TF
HORVU.MOREX.r3.5HG0494820	MYB	TF
HORVU.MOREX.r3.5HG0495090	bHLH	TF
HORVU.MOREX.r3.5HG0495750	B3	TF
HORVU.MOREX.r3.5HG0496120	FAR1	TF
HORVU.MOREX.r3.5HG0496170	Coactivator p15	TR
HORVU.MOREX.r3.5HG0496250	bZIP	TF
HORVU.MOREX.r3.5HG0496550	FAR1	TF
HORVU.MOREX.r3.5HG0496920	AP2/ERF-ERF	TF
HORVU.MOREX.r3.5HG0497120	AP2/ERF-ERF	TF
HORVU.MOREX.r3.5HG0497130	bHLH	TF
HORVU.MOREX.r3.5HG0497150	bHLH	TF
HORVU.MOREX.r3.5HG0497200	MYB	TF
HORVU.MOREX.r3.5HG0497230	PHD	TR
HORVU.MOREX.r3.5HG0497280	AP2/ERF-ERF	TF
HORVU.MOREX.r3.5HG0497330	bZIP	TF
HORVU.MOREX.r3.5HG0497460	TCP	TF
HORVU.MOREX.r3.5HG0497530	AP2/ERF-ERF	TF
HORVU.MOREX.r3.5HG0497540	AP2/ERF-ERF	TF
HORVU.MOREX.r3.5HG0497560	AP2/ERF-ERF	TF
HORVU.MOREX.r3.5HG0497570	AP2/ERF-ERF	TF
HORVU.MOREX.r3.5HG0497580	AP2/ERF-ERF	TF
HORVU.MOREX.r3.5HG0497590	AP2/ERF-ERF	TF
HORVU.MOREX.r3.5HG0497610	AP2/ERF-ERF	TF
HORVU.MOREX.r3.5HG0497620	AP2/ERF-ERF	TF
HORVU.MOREX.r3.5HG0497640	AP2/ERF-ERF	TF
HORVU.MOREX.r3.5HG0497650	AP2/ERF-ERF	TF
HORVU.MOREX.r3.5HG0497660	AP2/ERF-ERF	TF
HORVU.MOREX.r3.5HG0497670	AP2/ERF-ERF	TF
HORVU.MOREX.r3.5HG0497680	AP2/ERF-ERF	TF
HORVU.MOREX.r3.5HG0497710	AP2/ERF-ERF	TF
HORVU.MOREX.r3.5HG0497940	HB-HD-ZIP	TF
HORVU.MOREX.r3.5HG0497970	AP2/ERF-ERF	TF
HORVU.MOREX.r3.5HG0497990	HSF	TF
HORVU.MOREX.r3.5HG0498270	HB-HD-ZIP	TF
HORVU.MOREX.r3.5HG0498320	DBB	TF
HORVU.MOREX.r3.5HG0498330	AUX/IAA	TR
HORVU.MOREX.r3.5HG0498550	FAR1	TF
HORVU.MOREX.r3.5HG0498660	SRS	TF
HORVU.MOREX.r3.5HG0498830	Pseudo ARR-B	TR
HORVU.MOREX.r3.5HG0498910	MYB	TF
HORVU.MOREX.r3.5HG0499160	MADS-M-type	TF
HORVU.MOREX.r3.5HG0499930	C2H2	TF
HORVU.MOREX.r3.5HG0500520	MYB	TF
HORVU.MOREX.r3.5HG0500550	HB-HD-ZIP	TF
HORVU.MOREX.r3.5HG0500770	bZIP	TF
HORVU.MOREX.r3.5HG0501760	NAC	TF
HORVU.MOREX.r3.5HG0501840	SNF2	TR
HORVU.MOREX.r3.5HG0502310	WRKY	TF
HORVU.MOREX.r3.5HG0502370	bHLH	TF
HORVU.MOREX.r3.5HG0502710	SNF2	TR
HORVU.MOREX.r3.5HG0502890	C2H2	TF
HORVU.MOREX.r3.5HG0502900	C2H2	TF
HORVU.MOREX.r3.5HG0503060	RWP-RK	TF
HORVU.MOREX.r3.5HG0503260	TRAF	TR
HORVU.MOREX.r3.5HG0503710	HMG	TR
HORVU.MOREX.r3.5HG0504080	C2H2	TF
HORVU.MOREX.r3.5HG0504130	NAC	TF
HORVU.MOREX.r3.5HG0504140	NAC	TF
HORVU.MOREX.r3.5HG0504230	B3	TF
HORVU.MOREX.r3.5HG0504500	C2H2	TF
HORVU.MOREX.r3.5HG0504680	CPP	TF
HORVU.MOREX.r3.5HG0504800	SET	TR
HORVU.MOREX.r3.5HG0505180	Trihelix	TF
HORVU.MOREX.r3.5HG0505190	Trihelix	TF
HORVU.MOREX.r3.5HG0505240	C2H2	TF
HORVU.MOREX.r3.5HG0505250	C2H2	TF
HORVU.MOREX.r3.5HG0505310	C2H2	TF
HORVU.MOREX.r3.5HG0505740	mTERF	TR
HORVU.MOREX.r3.5HG0505900	B3	TF
HORVU.MOREX.r3.5HG0505960	C2H2	TF
HORVU.MOREX.r3.5HG0507420	FAR1	TF
HORVU.MOREX.r3.5HG0507700	C2C2-YABBY	TF
HORVU.MOREX.r3.5HG0507800	FAR1	TF
HORVU.MOREX.r3.5HG0508050	NF-YA	TF
HORVU.MOREX.r3.5HG0508400	MYB-related	TF
HORVU.MOREX.r3.5HG0508470	HB-HD-ZIP	TF
HORVU.MOREX.r3.5HG0508650	C2C2-LSD	TF
HORVU.MOREX.r3.5HG0508700	bHLH	TF
HORVU.MOREX.r3.5HG0509090	AUX/IAA	TR
HORVU.MOREX.r3.5HG0509120	AUX/IAA	TR
HORVU.MOREX.r3.5HG0509430	bHLH	TF
HORVU.MOREX.r3.5HG0509460	WRKY	TF
HORVU.MOREX.r3.5HG0509580	Others	TR
HORVU.MOREX.r3.5HG0509640	AP2/ERF-ERF	TF
HORVU.MOREX.r3.5HG0509730	AUX/IAA	TR
HORVU.MOREX.r3.5HG0509760	AUX/IAA	TR
HORVU.MOREX.r3.5HG0509970	HSF	TF
HORVU.MOREX.r3.5HG0510260	AP2/ERF-ERF	TF
HORVU.MOREX.r3.5HG0510280	PHD	TR
HORVU.MOREX.r3.5HG0510370	PHD	TR
HORVU.MOREX.r3.5HG0510910	C2H2	TF
HORVU.MOREX.r3.5HG0510920	MYB-related	TF
HORVU.MOREX.r3.5HG0511210	MADS-MIKC	TF
HORVU.MOREX.r3.5HG0511250	MADS-MIKC	TF
HORVU.MOREX.r3.5HG0511790	WRKY	TF
HORVU.MOREX.r3.5HG0512020	FAR1	TF
HORVU.MOREX.r3.5HG0512090	FAR1	TF
HORVU.MOREX.r3.5HG0512210	WRKY	TF
HORVU.MOREX.r3.5HG0512410	SWI/SNF-BAF60b	TR
HORVU.MOREX.r3.5HG0512710	GNAT	TR
HORVU.MOREX.r3.5HG0512730	C2H2	TF
HORVU.MOREX.r3.5HG0512740	bHLH	TF
HORVU.MOREX.r3.5HG0512760	SWI/SNF-BAF60b	TR
HORVU.MOREX.r3.5HG0512800	GARP-G2-like	TF
HORVU.MOREX.r3.5HG0512830	C2C2-Dof	TF
HORVU.MOREX.r3.5HG0512910	GRAS	TF
HORVU.MOREX.r3.5HG0513030	GARP-G2-like	TF
HORVU.MOREX.r3.5HG0513370	bZIP	TF
HORVU.MOREX.r3.5HG0513410	AP2/ERF-AP2	TF
HORVU.MOREX.r3.5HG0513490	MYB	TF
HORVU.MOREX.r3.5HG0513530	HB-KNOX	TF
HORVU.MOREX.r3.5HG0514020	GRAS	TF
HORVU.MOREX.r3.5HG0514310	NAC	TF
HORVU.MOREX.r3.5HG0514340	NAC	TF
HORVU.MOREX.r3.5HG0514350	NAC	TF
HORVU.MOREX.r3.5HG0514550	FAR1	TF
HORVU.MOREX.r3.5HG0515900	bHLH	TF
HORVU.MOREX.r3.5HG0516020	FAR1	TF
HORVU.MOREX.r3.5HG0516490	Rcd1-like	TR
HORVU.MOREX.r3.5HG0516530	C3H	TF
HORVU.MOREX.r3.5HG0516640	mTERF	TR
HORVU.MOREX.r3.5HG0516680	TCP	TF
HORVU.MOREX.r3.5HG0516900	Others	TR
HORVU.MOREX.r3.5HG0517220	AP2/ERF-ERF	TF
HORVU.MOREX.r3.5HG0517600	TRAF	TR
HORVU.MOREX.r3.5HG0518130	GNAT	TR
HORVU.MOREX.r3.5HG0518140	GNAT	TR
HORVU.MOREX.r3.5HG0518220	B3	TF
HORVU.MOREX.r3.5HG0518270	TRAF	TR
HORVU.MOREX.r3.5HG0518360	TRAF	TR
HORVU.MOREX.r3.5HG0518440	TRAF	TR
HORVU.MOREX.r3.5HG0518450	TRAF	TR
HORVU.MOREX.r3.5HG0518460	TRAF	TR
HORVU.MOREX.r3.5HG0519000	HSF	TF
HORVU.MOREX.r3.5HG0519050	B3	TF
HORVU.MOREX.r3.5HG0519060	B3	TF
HORVU.MOREX.r3.5HG0519220	B3	TF
HORVU.MOREX.r3.5HG0519420	bZIP	TF
HORVU.MOREX.r3.5HG0519660	bHLH	TF
HORVU.MOREX.r3.5HG0519690	AUX/IAA	TR
HORVU.MOREX.r3.5HG0519920	WRKY	TF
HORVU.MOREX.r3.5HG0520250	PHD	TR
HORVU.MOREX.r3.5HG0520960	DDT	TR
HORVU.MOREX.r3.5HG0521030	bHLH	TF
HORVU.MOREX.r3.5HG0521120	B3	TF
HORVU.MOREX.r3.5HG0521130	B3	TF
HORVU.MOREX.r3.5HG0521570	MYB	TF
HORVU.MOREX.r3.5HG0522040	Others	TR
HORVU.MOREX.r3.5HG0522470	mTERF	TR
HORVU.MOREX.r3.5HG0523210	bZIP	TF
HORVU.MOREX.r3.5HG0523290	MADS-M-type	TF
HORVU.MOREX.r3.5HG0523350	MADS-M-type	TF
HORVU.MOREX.r3.5HG0523460	TRAF	TR
HORVU.MOREX.r3.5HG0523890	FAR1	TF
HORVU.MOREX.r3.5HG0524270	bHLH	TF
HORVU.MOREX.r3.5HG0524340	mTERF	TR
HORVU.MOREX.r3.5HG0524400	NAC	TF
HORVU.MOREX.r3.5HG0524540	NAC	TF
HORVU.MOREX.r3.5HG0524630	AP2/ERF-ERF	TF
HORVU.MOREX.r3.5HG0524690	IWS1	TR
HORVU.MOREX.r3.5HG0525050	MYB-related	TF
HORVU.MOREX.r3.5HG0525560	Alfin-like	TF
HORVU.MOREX.r3.5HG0525620	AP2/ERF-AP2	TF
[truncated: 2,639 more rows]
