# Supplementary material for: Identification and Cloning of a Putative Male Fertility Gene Encoding an Oxidosqualene Cyclase in Qingke
Source: MDPI journal article supplement (doi:10.3390/agronomy13051292), 2023-04-30
Supplement: s1 [file s1 › Figure S1.pdf]

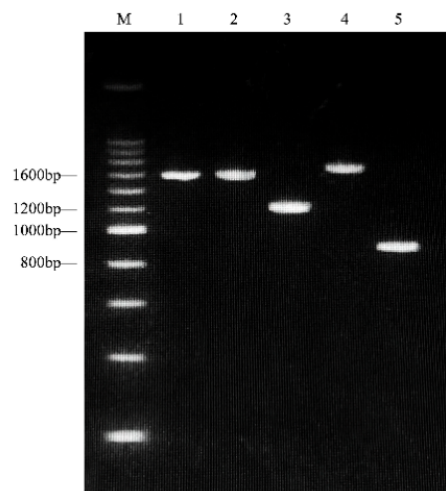

**Figure S1.** PCR amplification of DNA and promoter sequence of *HvtOSC12*. M, 200 bp DNA Ladder; 1, QK2000-1, the first DNA fragment of *HvtOSC12*; 2, QK2000-2, the second DNA fragment of *HvtOSC12*; 3, QK2000-3, the third DNA fragment of *HvtOSC12*; 4, Pro-1, the first promoter fragment of *HvtOSC12*; 5, Pro-2, the second promoter DNA fragment of *HvtOSC12*.
