# Supplementary material for: Identification and Cloning of a Putative Male Fertility Gene Encoding an Oxidosqualene Cyclase in Qingke
Source: MDPI journal article supplement (doi:10.3390/agronomy13051292), 2023-04-30
Supplement: s1 [file s1 › Figure S2.pdf]

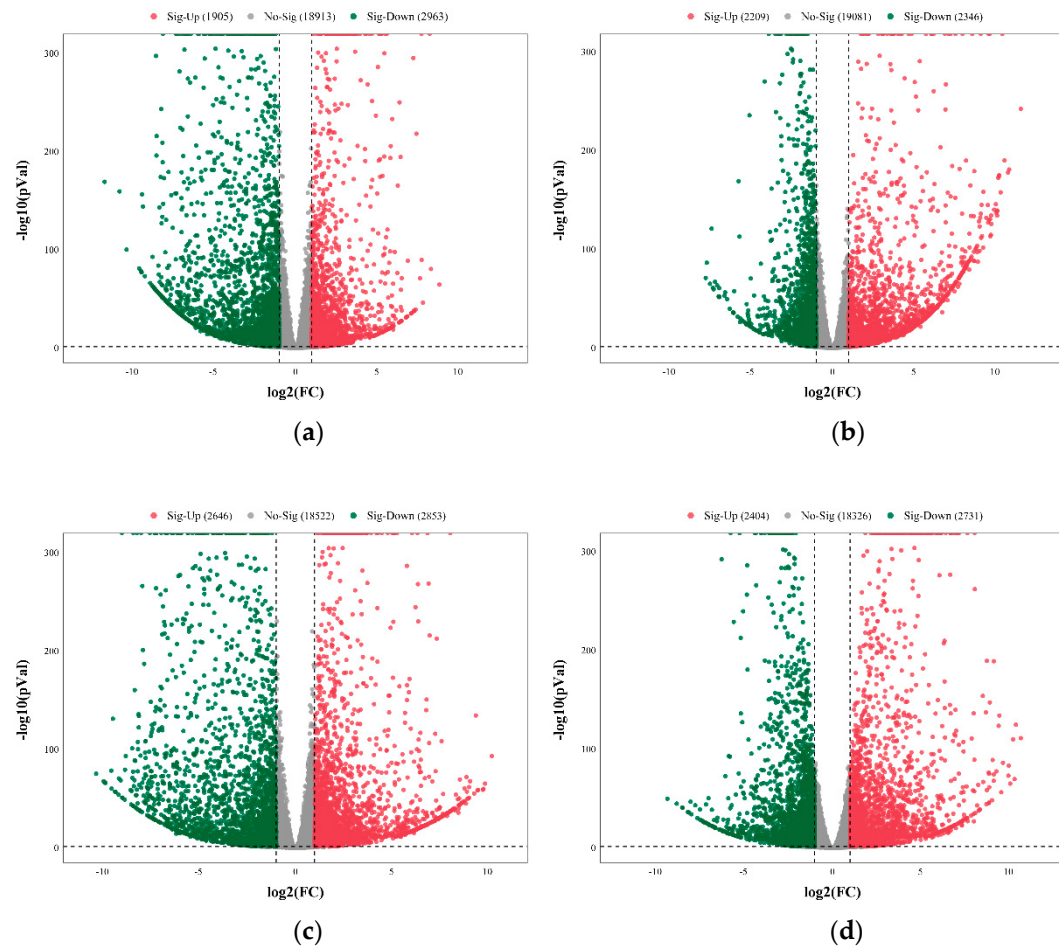

**Figure S2.** Volcano plot analysis of DEGs in ZQ2000 and XML22 at different periods. (a) ZQ2000-S1 vs. ZQ2000-S2; (b) ZQ2000-S2 vs. ZQ2000-S3; (c) XML22-S1 vs. XML22-S2; (d) XML22-S2 vs. XML22-S3. ZQ2000, Zangqing 2000; XML22, Ximala 22; S1, the anther was white, i.e., before anther maturation; S2, the anther was yellow and full, i.e., pollen just complete maturation but before anther dehiscence; S3, the anther was from yellow to white and dehiscence, i.e., after completion of pollination. The spot highlighted in red and green showed the up-regulated and down-regulated trends, respectively.
