# Supplementary material for: Identification and Cloning of a Putative Male Fertility Gene Encoding an Oxidosqualene Cyclase in Qingke
Source: MDPI journal article supplement (doi:10.3390/agronomy13051292), 2023-04-30
Supplement: s1 [file s1 › Figure S3.pdf]

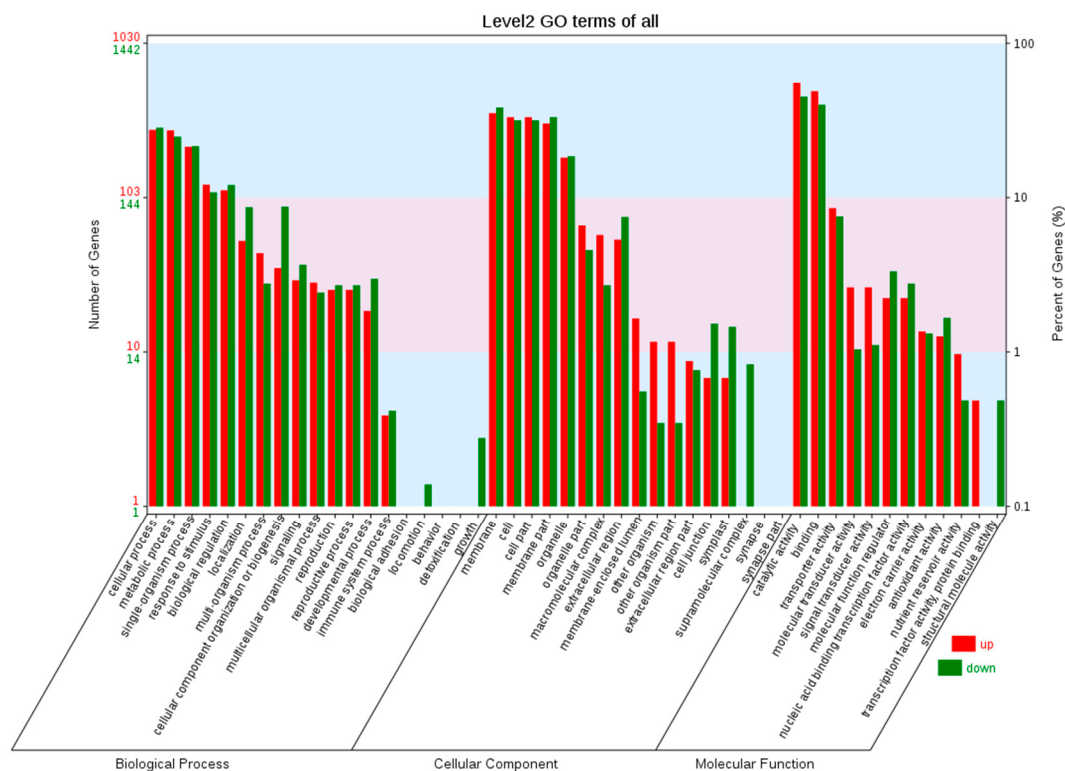

(a)

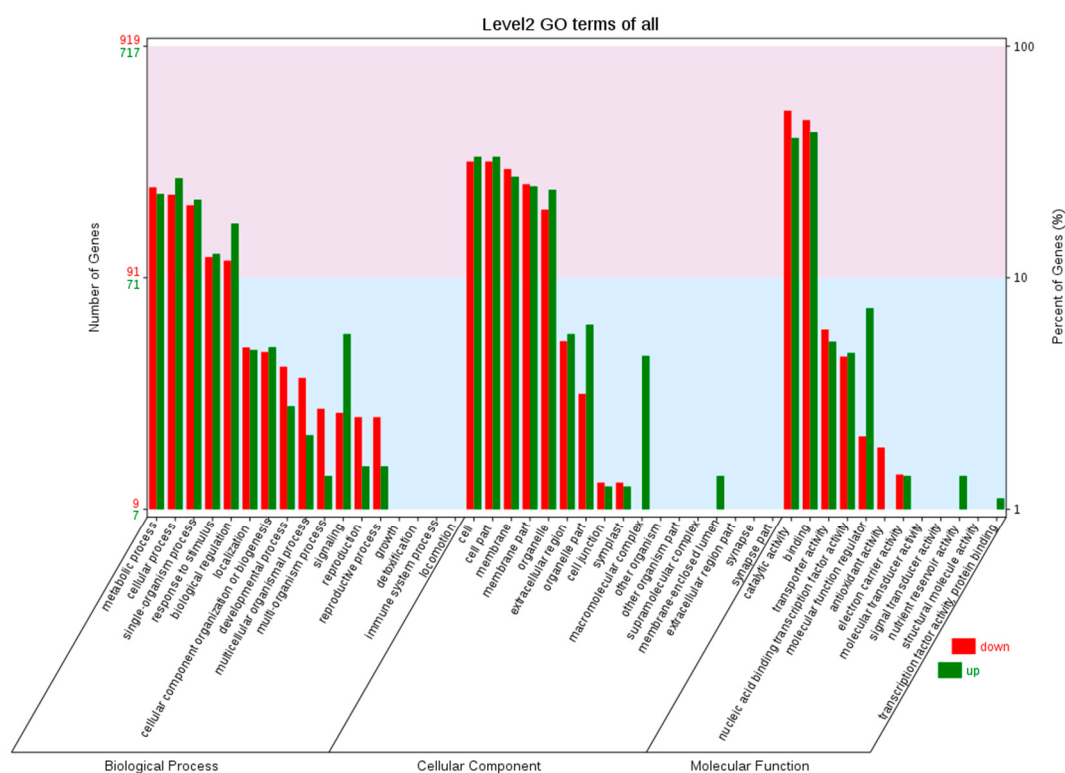

(b)

**Figure S3.** GO enrichment analysis of DEGs in Qingke at different stages. (a) S1 vs. S2; (b) S2 vs. S3. S1, the anther was white, i.e., before anther maturation; S2, the anther was yellow and full, i.e., pollen just

complete maturation but before anther dehiscence; S3, the anther was from yellow to white and dehisced, i.e., after completion of pollination.
