# Supplementary material for: Identification and Cloning of a Putative Male Fertility Gene Encoding an Oxidosqualene Cyclase in Qingke
Source: MDPI journal article supplement (doi:10.3390/agronomy13051292), 2023-04-30
Supplement: s1 [file s1 › Figure S4.pdf]

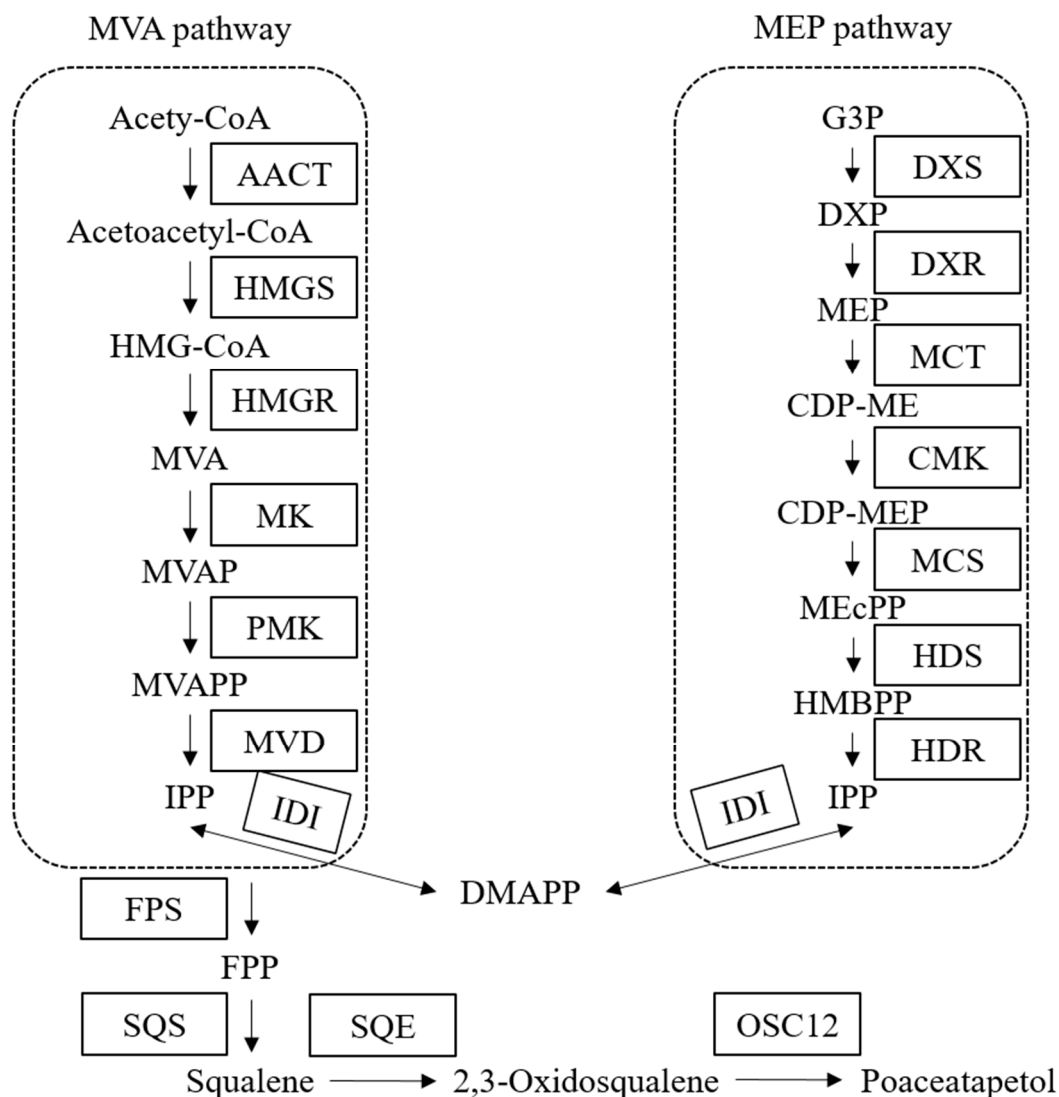

**Figure S4.** The genes encoding key enzymes were involved in the possible poaceatpetol biosynthesis pathway. MVA, Mevalonate; MEP, 2-C-methyl-D-erythritol-4-phosphate; HMG-CoA, 3-Hydroxy-3-methylglutaryl-CoA; MAVP, Mvalonate-5-phosphate; MVAPP, Mvalonate-5-diphosphate; IPP, Isopentenylpyrophosphate; G3P, Glyceraldehyde-3-phosphate; DXP, 1-Deoxy-D-xylulose-5-phosphate; CDP-ME, 4-Diphosphocytidyl-2-C-methylerythritol; CDE-MEP, 4-Diphosphocytidyl-2-C-methyl-D-erythritol 2-phosphat; MEcPP, 2-C-methyl-D-erythritol 2,4-cyclodiphosphate; HMBPP, 1-Hydroxy-2-methyl-2-(E)-butenyl 4-diphosphate; DMAPP, Dimethylallylpyrophosphate; FPP, Farnesyl diphosphate; AACT, Acetyl-CoA C-acetyltransferase; HMGS, Hydroxymethylglutaryl-CoA synthase; HMGR, 3-Hydroxy-3-methylglutaryl-CoA reductase; MK, Mevalonate kinase; PMK, Phosphomevalonate kinase; MVD, Diphosphomevalonate decarboxylase; DXS, 1-Deoxy-D-xylulose-5-phosphate synthase; DXR, 1-Deoxy-Dl-xylulose 5-phosphate reductoisomerases; MCT, 2-C-methyl-D-erythritol 4-phosphate cytidyltransferase; CMK, 4-Diphosphocytidyl-2-C-methyl-D-erythritol kinase; MCS, 2-C-methyl-D-erythritol 2,4-cyclodiphosphate synthase; HDS, (E)-4-hydroxy-3-methylbut-2-enyl-diphosphate synthase; HDR, (E)-4-hydroxy-3-methylbut-2-enyl-diphosphate reductase; IDI, Isopentenyl-diphosphate Delta-isomerase; FPS, Farnesyl diphosphate synthase; SQS, Squalene synthase; SQE, Squalene epoxidase; OSC, Oxidosqualene cyclase.
