# Supplementary material for: Identification and Cloning of a Putative Male Fertility Gene Encoding an Oxidosqualene Cyclase in Qingke
Source: MDPI journal article supplement (doi:10.3390/agronomy13051292), 2023-04-30
Supplement: s1 [file s1 › Figure S6.pdf]

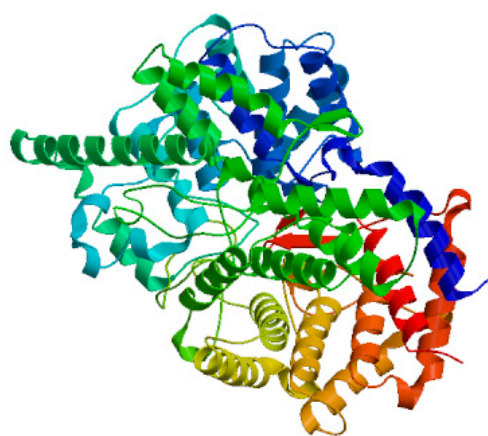

(a)

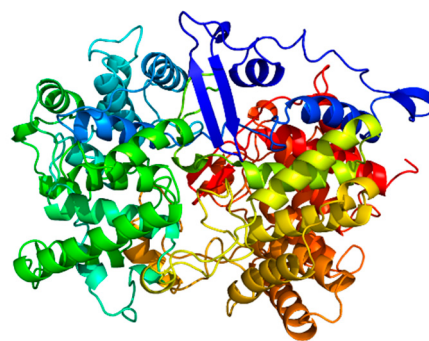

(b)

**Figure S6.** Prediction of the tertiary structure of HvtOSC12 protein. (a) Prediction by SWISS-MODEL; (b) Prediction by Phyre2.
