# Supplementary material for: Identification and Cloning of a Putative Male Fertility Gene Encoding an Oxidosqualene Cyclase in Qingke
Source: MDPI journal article supplement (doi:10.3390/agronomy13051292), 2023-04-30
Supplement: s1 [file s1 › Table S1.xlsx]

## Sheet: Sheet1
Table S1. Primers of HvtOSC12 gene for PCR amplification.
Primer name	Primer sequence (5’-3’)	Length (bp)	Purpose
qRT-1-F	AGGGCCTGTCAGCAGTTGG	138	qRT-PCR
qRT-1-R	CAGCGTTTACCTTGGTTGTGG
Actin 3-F	TCCAGGCAGTGCTTTCCCTA	219	qRT-PCR
Actin 3-R	AGCGAGGTCAAGACGAAGGA
QK2000-1-F	TGTTTGGGTCATCACCTTCAA	1592	Gene cloning
QK2000-1-R	ATGGATAGTGCCTGTAATAATGTTT
QK2000-2-F	CTTACGGAGGTCTTCTCAAAAT	1613	Gene cloning
QK2000-2-R	GAACCGTCCTCATTCTGTAACT
QK2000-3-F	CCCTGTTTCGGCAAAAATACCC	1214	Gene cloning
QK2000-3-R	CGGCAGAGGAGAGGAGCATCAT
Pro-1-F	GTTTATTGGCTGATTGTACC	1695	Promoter cloning
Pro-1-R	GGCTGAAGTTATTCTCCTTTGCTA
Pro-2-F	CCTCCGTACTACCATCGC	880	Promoter cloning
Pro-2-R	AGAAGACTGAAGGTGCAG
