# Supplementary material for: Identification and Cloning of a Putative Male Fertility Gene Encoding an Oxidosqualene Cyclase in Qingke
Source: MDPI journal article supplement (doi:10.3390/agronomy13051292), 2023-04-30
Supplement: s1 [file s1 › Table S2.xlsx]

## Sheet: Sheet1
Table S2. Statistics on mapping of sequencing data with the reference genome.
Sample	Total Reads	Mapped Reads	Uniq Mapped Reads	Multiple Map Reads	Reads Map to '+'	Reads Map to '-'
ZQ2000-S1-1	44170894	41,462,949 (93.87%)	40,583,532 (91.88%)	879,417 (1.99%)	21,392,077 (48.43%)	21,395,142 (48.44%)
ZQ2000-S1-2	39878874	37,551,880 (94.16%)	36,764,053 (92.19%)	787,827 (1.98%)	19,371,558 (48.58%)	19,370,148 (48.57%)
ZQ2000-S1-3	40738214	37,077,763 (91.01%)	36,215,228 (88.90%)	862,535 (2.12%)	19,207,474 (47.15%)	19,213,775 (47.16%)
ZQ2000-S2-1	47596914	44,611,298 (93.73%)	43,659,449 (91.73%)	951,849 (2.00%)	23,003,368 (48.33%)	22,999,419 (48.32%)
ZQ2000-S2-2	41062320	37,378,364 (91.03%)	36,501,199 (88.89%)	877,165 (2.14%)	19,352,377 (47.13%)	19,362,018 (47.15%)
ZQ2000-S2-3	46890420	44,069,112 (93.98%)	43,115,219 (91.95%)	953,893 (2.03%)	22,725,138 (48.46%)	22,729,151 (48.47%)
ZQ2000-S3-1	42084648	39,736,805 (94.42%)	38,845,551 (92.30%)	891,254 (2.12%)	20,550,450 (48.83%)	20,519,962 (48.76%)
ZQ2000-S3-2	41224394	38,926,756 (94.43%)	38,053,169 (92.31%)	873,587 (2.12%)	20,122,331 (48.81%)	20,102,386 (48.76%)
ZQ2000-S3-3	43027128	39,808,674 (92.52%)	38,894,123 (90.39%)	914,551 (2.13%)	20,593,676 (47.86%)	20,585,864 (47.84%)
XML22-S1-1	41815494	39,058,948 (93.41%)	38,182,685 (91.31%)	876,263 (2.10%)	20,183,927 (48.27%)	20,188,964 (48.28%)
XML22-S1-2	40952718	37,958,903 (92.69%)	37,073,571 (90.53%)	885,332 (2.16%)	19,651,323 (47.99%)	19,664,956 (48.02%)
XML22-S1-3	40137604	37,389,662 (93.15%)	36,543,224 (91.04%)	846,438 (2.11%)	19,336,909 (48.18%)	19,342,203 (48.19%)
XML22-S2-1	41255134	37,617,890 (91.18%)	36,663,772 (88.87%)	954,118 (2.31%)	19,564,174 (47.42%)	19,560,683 (47.41%)
XML22-S2-2	41122588	38,293,109 (93.12%)	37,326,767 (90.77%)	966,342 (2.35%)	19,908,979 (48.41%)	19,898,550 (48.39%)
XML22-S2-3	40354590	37,226,410 (92.25%)	36,282,067 (89.91%)	944,343 (2.34%)	19,348,500 (47.95%)	19,347,109 (47.94%)
XML22-S3-1	41364516	37,812,666 (91.41%)	35,940,285 (86.89%)	1,872,381 (4.53%)	20,589,159 (49.77%)	20,681,133 (50.00%)
XML22-S3-2	40816452	38,091,162 (93.32%)	36,193,617 (88.67%)	1,897,545 (4.65%)	20,791,026 (50.94%)	20,863,666 (51.12%)
XML22-S3-3	44240226	41,173,712 (93.07%)	39,028,441 (88.22%)	2,145,271 (4.85%)	22,525,660 (50.92%)	22,633,375 (51.16%)
ZQ2000, Zangqing 2000; XML22, Ximala 22; S1, the anther was white, i.e., before anther maturation; S2, the anther was yellow and full, i.e., pollen just complete maturation but before anther dehiscence; S3, the anther was from yellow to white and dehisced, i.e., after completion of pollination.
