# Supplementary material for: Identification and Cloning of a Putative Male Fertility Gene Encoding an Oxidosqualene Cyclase in Qingke
Source: MDPI journal article supplement (doi:10.3390/agronomy13051292), 2023-04-30
Supplement: s1 [file s1 › Table S3.xlsx]

## Sheet: Sheet1
Table S3. Terpenoid biosynthesis-related gene annotation.
Gene name	Gene ID	log2FC (S1 vs. S2)		log2FC (S2 vs. S3)
		ZQ2000	XML22	ZQ2000	XML22
AACT	HORVU.MOREX.r3.2HG0100130	/	/	/	/
	HORVU.MOREX.r3.3HG0219040	0.288	0.291	-0.013	0.265
	HORVU.MOREX.r3.5HG0470030	0.47	0.728	0.619	0.898
HMGS	HORVU.MOREX.r3.7HG0686730	0.311	0.262	0.193	-0.282
	HORVU.MOREX.r3.4HG0413400	-0.403	-0.089	0.37	0.312
	HORVU.MOREX.r3.4HG0413410	1.271	0.848	0.004	0.084
HMGR	HORVU.MOREX.r3.6HG0609100	-2.391	-2.334	2.982	4.021
	HORVU.MOREX.r3.7HG0680680	-0.227	-0.327	-0.238	-1.231
	HORVU.MOREX.r3.5HG0491360	0.099	0.279	-0.987	-0.623
MK	HORVU.MOREX.r3.2HG0209080	0.266	0.441	0.189	-0.143
PMK	HORVU.MOREX.r3.4HG0391330	0.624	0.937	-0.068	-0.219
MVD	HORVU.MOREX.r3.3HG0326430	0.46	0.455	-1.032	-0.807
	HORVU.MOREX.r3.5HG0519810	0.095	0.409	0.824	0.584
DXS	HORVU.MOREX.r3.1HG0062480	0.319	0.862	-1.392	-2.051
	HORVU.MOREX.r3.1HG0085440	2.824	4.094	-1.206	-0.552
	HORVU.MOREX.r3.2HG0216680	6.006	/	0.374	2.128
DXR	HORVU.MOREX.r3.3HG0218370	0.302	-0.09	0.172	0.145
MCT	HORVU.MOREX.r3.3HG0306730	0.418	0.334	-1.062	-0.449
CMK	HORVU.MOREX.r3.3HG0295260	0.49	0.467	-0.223	-0.255
MCS	HORVU.MOREX.r3.6HG0604230	0.863	0.597	0.123	0.685
HDS	HORVU.MOREX.r3.6HG0592460	1.399	1.994	-0.906	-0.59
IDI	HORVU.MOREX.r3.1HG0066250	0.934	1.122	-0.9	-0.336
	HORVU.MOREX.r3.2HG0138210	1.564	1.951	1.356	2.555
FPS	HORVU.MOREX.r3.1HG0079800	0.109	0.306	2.058	3.303
	HORVU.MOREX.r3.2HG0202590	0.114	-0.253	-0.159	0.894
	HORVU.MOREX.r3.3HG0282380	/	/	/	/
	HORVU.MOREX.r3.3HG0283300	-0.022	0.083	-0.763	-0.069
	HORVU.MOREX.r3.4HG0356780	-0.547	-0.41	-0.062	0.046
	HORVU.MOREX.r3.5HG0449620	-0.798	-1.055	-0.094	0.016
SQS	HORVU.MOREX.r3.5HG0522240	0.224	-0.129	0.406	1.215
OSC12	HORVU.MOREX.r3.7HG0634780	-6.739	-7.619	/	/
The box highlighted in red and green showed the up-regulated and down-regulated trends, respectively. ZQ2000, Zangqing 2000; XML22, Ximala 22; S1, the anther was white, i.e., before anther maturation; S2, the anther was yellow and full, i.e., pollen just complete maturation but before anther dehiscence; S3, the anther was from yellow to white and dehisced, i.e., after completion of pollination.
