# Supplementary material for: Identification and Cloning of a Putative Male Fertility Gene Encoding an Oxidosqualene Cyclase in Qingke
Source: MDPI journal article supplement (doi:10.3390/agronomy13051292), 2023-04-30
Supplement: s1 [file s1 › Table S4.xlsx]

## Sheet: Sheet1
Table S4. Physical and chemical properties of HvtOSC12 protein.
Protein character	HvtOSC12
Formula	C3870H5900N1056O1124S39
Total number of atoms	11989
Molecular weight (kDa)	86.45
Theoretical pI	6.02
Total number of negatively charged residues (Asp + Glu)	89
Total number of positively charged residues (Arg + Lys)	76
Extinction coefficients	2.06
Estimated half-life (h)	30
Instability index	38.77
Aliphatic index	78.7
Grand average of hydropathicity (GRAVY)	-0.316
