# Supplementary material for: Identification and Cloning of a Putative Male Fertility Gene Encoding an Oxidosqualene Cyclase in Qingke
Source: MDPI journal article supplement (doi:10.3390/agronomy13051292), 2023-04-30
Supplement: s1 [file s1 › Table S5.xlsx]

## Sheet: Sheet1
Table S5. Prediction of the secondary structure of HvtOSC12 protein.
Form of secondary structure	Frequency (%)	Frequency (%)
	Website: PSIPRED	Website: SOPMA
Alpha-helix	50.79	45.03
Random coil	45.81	35.34
Extended strand	3.4	12.7
Beta-burn	/	6.94
