# Supplementary material for: Identification and Cloning of a Putative Male Fertility Gene Encoding an Oxidosqualene Cyclase in Qingke
Source: MDPI journal article supplement (doi:10.3390/agronomy13051292), 2023-04-30
Supplement: s1 [file s1 › Table S6.xlsx]

## Sheet: Sheet1
Table S6. The cis-acting elements and functions of the HvtOSC12 promoter.
Name of cis-acting element	Number	Function
TATA-box	24	Core promoter element around -30 of transcription start
CAAT-box	35	Common cis-acting element in promoter and enhancer regions
A-box	1	Cis-acting regulatory element
ATCT-motif	1	Part of a conserved DNA module involved in light responsiveness
Box 4	2	Part of a conserved DNA module involved in light responsiveness
TCCC-motif	1	Part of a light responsive element
Sp1	1	Light responsive element
GT1-motif	2	Light responsive element
TCT-motif	2	Part of a light responsive element
GATA-motif	2	Part of a light responsive element
TGACG-motif	5	Cis-acting regulatory element involved in the MeJA-responsiveness
CCGTCC-motif	1	Cis-acting regulatory element involved in the MeJA-responsiveness
CGTCA-motif	5	Cis-acting regulatory element involved in the MeJA-responsiveness
LTR	1	Cis-acting element involved in low-temperature responsiveness
MYB	5	Cis-acting regulatory element involved in the adversity stress response
MYB-like sequence	3	Cis-acting regulatory element involved in the adversity stress response
Myc	1	Cis-acting components of drought and ABA response
MBS	3	MYB binding site involved in drought-inducibility
DRE1	1	Cis-acting regulatory element involved in the adversity stress response
DRE core	3	Cis-acting regulatory element involved in the adversity stress response
STRE	1	Duress response elements
ARE	4	Cis-regulatory elements necessary for anaerobic induction
CCGTCC-box	1	Cis-primers associated with hyphal tissue activity
CAT-box	2	cis-acting regulatory element related to meristem expression
RY-element	1	cis-acting regulatory element involved in seed-specific regulation
AuxRR-core	1	cis-acting regulatory element involved in auxin responsiveness
P-box	2	gibberellin-responsive element
O2-site	2	cis-acting regulatory element involved in zein metabolism regulation
AACA_motif	1	involved in endosperm-specific negative expression
