# Supplementary material for: Identification and Cloning of a Putative Male Fertility Gene Encoding an Oxidosqualene Cyclase in Qingke
Source: MDPI journal article supplement (doi:10.3390/agronomy13051292), 2023-04-30
Supplement: s1 [file s1 › Table S7.xlsx]

## Sheet: Sheet1
Table S7. Predictive analysis of the transcription start site for HvtOSC12.
Start	End	Score	Sequence
596	646	0.82	GCAGTAGGGATAAATAAGCAGAATGTGCAGCATGCATGTACAATCAATCC
784	834	0.89	ACATTTGTTGAATAAAGCTCCCCTAGTTAATTCTGCAAGGAAGAAGATGC
1176	1226	0.83	TATCAACTTATATAAAATGTTTCTACTTGCACAATCTTCTTTCTTTCTAC
1386	1436	0.95	AAATCGGCTAAATATATCATCGGTAGGGCACACGATTGGTTTCAGAGTGC
1663	1713	0.9	TCCCTGGACATATAAACACATTCGGGCCAATTCTTCATGCATCATCCCAT
