# Supplementary material for: Identification and Cloning of a Putative Male Fertility Gene Encoding an Oxidosqualene Cyclase in Qingke
Source: MDPI journal article supplement (doi:10.3390/agronomy13051292), 2023-04-30
Supplement: s1 [file s1 › Table S8.xlsx]

## Sheet: Sheet1
Table S8. The expression change trends of genes that encoding MYB/MYB-related transcription factor.
Gene ID	ZQ2000-S1 vs. ZQ2000-S2	XML22-S1 vs. XML22-S2
HORVU.MOREX.r3.1HG0018590	Down	Down
HORVU.MOREX.r3.1HG0079750	Down	Down
HORVU.MOREX.r3.1HG0079760	Down	Down
HORVU.MOREX.r3.1HG0090040	Down	Up
HORVU.MOREX.r3.2HG0121480	Down	Down
HORVU.MOREX.r3.2HG0184130	Down	Down
HORVU.MOREX.r3.2HG0189810	Down	Down
HORVU.MOREX.r3.2HG0196050	Down	Up
HORVU.MOREX.r3.3HG0264850	Down	Down
HORVU.MOREX.r3.3HG0270100	Down	Down
HORVU.MOREX.r3.3HG0283250	Down	Down
HORVU.MOREX.r3.3HG0284070	Up	Up
HORVU.MOREX.r3.4HG0346020	Up	Up
HORVU.MOREX.r3.4HG0347760	Down	Down
HORVU.MOREX.r3.4HG0383040	Down	Down
HORVU.MOREX.r3.4HG0407830	Down	Down
HORVU.MOREX.r3.5HG0447760	Down	Down
HORVU.MOREX.r3.6HG0566060	Down	Down
HORVU.MOREX.r3.6HG0604730	Down	Down
HORVU.MOREX.r3.6HG0612680	Down	Down
HORVU.MOREX.r3.6HG0617380	Down	Down
HORVU.MOREX.r3.7HG0687560	Down	Down
HORVU.MOREX.r3.7HG0711530	Down	Down
HORVU.MOREX.r3.7HG0734500	Down	Down
HORVU.MOREX.r3.7HG0744480	Up	Up
HORVU.MOREX.r3.7HG0746520	Down	Down
HORVU.MOREX.r3.7HG0751030	Down	Down
